1 **Emergence and Persistent Dominance of Omicron BA.2.3.7 Variant in**  
2 **Community Outbreaks in Taiwan**

3

4 Pei-Lan Shao<sup>1,2\*</sup>, Hsiao-Chen Tu<sup>3\*</sup>, Yu-Nong Gong<sup>4,5,6\*</sup>, Hung-Yu Shu<sup>7</sup>, Ralph  
5 Kirby<sup>8</sup>, Li-Yun Hsu<sup>1</sup>, Hui-Yee Yeo<sup>1</sup>, Han-Yueh Kuo<sup>9</sup>, Yi-Chia Huang<sup>9</sup>, Yung-Feng  
6 Lin<sup>3</sup>, Hui-Ying Weng<sup>10,11</sup>, Yueh-Lin Wu<sup>12,13,14,15</sup>, Chien-Chih Chen<sup>16</sup>, Tzen-Wen  
7 Chen<sup>12</sup>, Kuo-Ming Lee<sup>4,6,17</sup>, Chung-Guei Huang<sup>5,18</sup>, Shin-Ru Shih<sup>4,5,18,19</sup>, Wei J  
8 Chen<sup>20,21</sup>, Chen-Chi Wu<sup>1</sup>, Chong-Jen Yu<sup>9#</sup>, Shih-Feng Tsai<sup>3,8#</sup>

9

10 <sup>1</sup>Department of Laboratory Medicine, National Taiwan University Hospital Hsin-Chu  
11 Branch

12 <sup>2</sup>Department of Pediatrics, National Taiwan University Hospital Hsin-Chu Branch

13 <sup>3</sup>Institute of Molecular and Genomic Medicine, National Health Research Institutes,  
14 Miaoli, Taiwan

15 <sup>4</sup>Research Center for Emerging Viral Infections, College of Medicine, Chang Gung  
16 University, Taoyuan, Taiwan

17 <sup>5</sup>Department of Laboratory Medicine, Linkou Chang Gung Memorial Hospital,  
18 Taoyuan, Taiwan

19 <sup>6</sup>International Master Degree Program for Molecular Medicine in Emerging Viral  
20 Infections, College of Medicine, Chang Gung University, Taoyuan, Taiwan

21 <sup>7</sup>Department of Bioscience Technology, Chang Jung Christian University, Tainan,  
22 Taiwan

23 <sup>8</sup>National Yang Ming Chiao Tung University, Taipei, Taiwan

24 <sup>9</sup>Department of Internal Medicine, National Taiwan University Hospital Hsin-Chu  
25 Branch

26 <sup>10</sup>Biomedical Industry Ph.D. Program, National Yang-Ming University, Taipei,  
27 Taiwan.

28 <sup>11</sup>Biomedical Industry Ph.D. Program, National Yang Ming Chiao Tung University

29 <sup>12</sup>Division of Nephrology, Department of Internal Medicine, Wei-Gong Memorial  
30 Hospital, Miaoli, Taiwan

31 <sup>13</sup>Institute of Molecular and Genomic Medicine, College of Medicine, National  
32 Health Research Institutes, Miaoli, Taiwan

33 <sup>14</sup>TMU Research Center of Urology and Kidney, Taipei Medical University, Taipei,  
34 Taiwan

35 <sup>15</sup>Division of Nephrology, Department of Internal Medicine, Taipei Medical  
36 University Hospital, Taipei, Taiwan

37 <sup>16</sup>Department of Laboratory Medicine, Wei-Gong Memorial Hospital, Miaoli, Taiwan

38 <sup>17</sup>Division of Infectious Disease, Department of Pediatrics, Linkou Chang Gung  
39 Memorial Hospital, Taoyuan, Taiwan

40 <sup>18</sup>Department of Medical Biotechnology and Laboratory Science, College of  
41 Medicine, Chang Gung University, Taoyuan, Taiwan

42 <sup>19</sup>Research Center for Chinese Herbal Medicine, Research Center for Food and  
43 Cosmetic Safety, Graduate Institute of Health Industry Technology, College of  
44 Human Ecology, Chang Gung University of Science and Technology, Taoyuan,  
45 Taiwan

46 <sup>20</sup>Center for Neuropsychiatric Research, National Health Research Institutes, Miaoli,  
47 Taiwan

48 <sup>21</sup>Institute of Epidemiology and Preventive Medicine, College of Public Health,  
49 National Taiwan University, Taipei, Taiwan

50

51 \* These authors contributed equally

52 # Corresponding authors

53

54 **ABSTRACT**

55 Since April 2022, waves of Omicron cases have surfaced in Taiwan and spread  
56 throughout the island. Using high-throughput sequencing of the SARS-CoV-2  
57 genome, we have analyzed 2405 PCR-positive swab samples from 2339 individuals  
58 and identified the Omicron BA.2.3.7 variant as a major lineage within the recent  
59 community outbreak in Taiwan.

60

61 **THE STUDY**

62 The coronavirus disease 2019 (COVID-19) pandemic, caused by severe acute  
63 respiratory syndrome coronavirus 2 (SARS-CoV-2), originated in the People's  
64 Republic of China (PRC) in late 2019, probably in the city of Wuhan<sup>1-2</sup>. The outbreak  
65 of this unusual respiratory disease led to a wide variety of different responses by  
66 various countries across the world<sup>3-6</sup>. The response of Taiwan was rapid and based on  
67 both its proximity to the PRC and its experiences during the SARS pandemic almost  
68 two decades earlier<sup>5,7,8</sup>. The introduction of almost complete travel restrictions on  
69 incoming air and sea passengers, long compulsory quarantine periods for the few  
70 residents who were allowed to enter Taiwan and a very wide acceptance by the  
71 population of social distancing, temperature checks, mask wearing, etc., in all social  
72 situations, meant that, unlike many other countries, the entry of the COVID-19  
73 pandemic was delayed significantly<sup>5,9,10</sup>. Until April 2022, there were only limited  
74 breakthroughs, all of which were quickly contained. Hence, Taiwan provides a unique  
75 opportunity to explore what happened when the Omicron variant finally evaded the  
76 controls put in place by the Taiwan government and began to spread through the  
77 country's population. The Taiwanese population had not been exposed on a large  
78 scale to any of the virus variants before Omicron. By the time the virus began to

79 spread widely in April 2022, there had been around seventeen thousand recorded  
80 cases of COVID-19, and most of them were infected by the Alpha variant. Almost all  
81 of the cases in our current study had not been infected with COVID-19 before.  
82 Furthermore, the vaccination rates of Taiwan's population at that time, were 82.7%,  
83 78.0%, and 59.1% with single dose, double doses, and triple doses, respectively. The  
84 vaccines used in Taiwan before May 2022 were the Oxford–AstraZeneca COVID-19  
85 vaccine, the Pfizer-BioNTech vaccine, the Moderna COVID-19 vaccine, the Johnson  
86 & Johnson's Janssen (J&J/Janssen) COVID-19 vaccine, and The Median COVID-19  
87 vaccine (a protein subunit COVID-19 vaccine made in Taiwan). Most Taiwanese  
88 received doses of the first three vaccines.  
89 Very few COVID-19 cases had occurred in Taiwan during 2020 and 2021. Clustered  
90 infections were reported in May and June 2021, mainly in northern Taiwan. Even at  
91 their peak, only hundreds of positive cases were recorded by Taiwan's Centers for  
92 Disease Control (CDC). At the beginning of 2022, a number of Omicron infection  
93 clusters were noted, first in northern Taiwan, and very soon after new cases began to  
94 exceed fifty thousand per day with outbreaks affecting the entire country (Figure 1A)  
95 (<https://nidss.cdc.gov.tw/nndss/disease?id=19CoV>). To gain insights into community  
96 transmission and to monitor viral evolution, we deployed a genomic surveillance  
97 protocol at National Taiwan University Hospital Hsinchu Branch (NTU-HCH)  
98 whereby left-over nasal swab samples that had been detected by PCR to be positive  
99 were whole-genome sequenced (see Appendix methods for details).  
100 To ensure data quality, we have only submitted genomic data to GISAID on those  
101 sequences that had a greater than 98% coverage of the 29903 bp SARS-CoV-2 target  
102 genome. The same set of high-quality sequences were used for tracking the signature  
103 mutations in the viral samples (**Table 1**) and for phylogenetic analysis (**Figure 2**, see

104 Appendix methods for details). Overall, 2405 samples in all five batches met the  
105 above criterion and this generated 2043 sequences (84.9% pass rate), and 1966  
106 sequences were selected for GISAID submission. (**Appendix Table 1**)  
107 We analyzed the assembled viral genome sequences (**Appendix Table 2**) and tracked  
108 the lineages and significant amino acid changes in the Omicron samples collected  
109 during year 2022 (**Figures 1B and 1C**). Comparing the later three data sets (batch 3  
110 to batch 5), we discovered that three amino acid changes (ORF1a:L631F, S:K97E,  
111 N:M322I) occurred only after the fourth sequencing batch. The percentage of  
112 sequences containing the signatures progressed steadily from 62 % in batch 4 to 85%  
113 in batch 5. All batch 3 isolates belonged to the BA.1 or BA.2 classification. This  
114 suggests that the rapid increase of cases in Taiwan in April and May, from previously  
115 zero cases per day, to almost reaching a hundred thousand per day, came from a  
116 strain, BA.2.3.7, that might have been involved in a founder effect.  
117 To construct the framework of the phylogenetic tree, first we took 1966 genome  
118 sequences from this study and analyzed them in the global context of 872 GISAID  
119 reference sequences (**Figure 2A**). On this basis, we then zoomed in and compared the  
120 1584 Omicron sequences of the current study against the 228 Omicron BA.2.3.7  
121 strains from the GISAID database. These sequences were reported from 21 countries,  
122 including 51 from Taiwan (**Table 2**). We have conducted phylogenetic analysis using  
123 the Pango-dynamic nomenclature system<sup>11</sup>.  
124 It is evident that this novel lineage BA.2.3.7 with three amino acid changes  
125 (ORF1a:L631F, ORF1a:S:K97E, and N:M322I) was circulating dominantly in  
126 Taiwan over the study period. Notably, the first BA.2.3.7 strain identified in the  
127 epidemic in Taiwan was collected on March 27<sup>th</sup>, 2022, and, since that point, we were  
128 able to detect several genomic changes affecting this Omicron lineage. For example, a

129 new mutation, G1251V (**Figure 2B**, marked in green) in the Spike protein, was  
130 detected from April onwards, and this particular circulating lineage then rapidly  
131 spread across Taiwan.

132 While this paper was in preparation, we became aware that a number of viral  
133 sequences with the same signature mutations had been reported from Taiwan. Even  
134 though the number was relatively small (51 cases) as compared to our serial  
135 investigation at a single medical center, the four locations in Taiwan of the reported  
136 cases are different from our collection point at the hospital. Thus, this new lineage  
137 would seem to be detectable broadly across Taiwan.

138 Notably, over the same time period, other Asia Pacific countries also reported a  
139 significant cumulative prevalence of the BA.2.3.7 variant (**Table 2**). Among the 44  
140 Omicron BA.2.3.7 strains reported from Japan, two of the affected individuals had  
141 travel history to Vietnam and 41 to Taiwan, suggesting significant silent outward  
142 transmission from Taiwan. In contrast, BA.2.3.7 forms less than 0.5% of the  
143 sequences reported in either California, USA, or globally. The emergence of Omicron  
144 BA.2.3.7 in Asia is remarkable. While there is no reliable genomic data from the early  
145 cases in Malaysia and Vietnam, our phylogenetic analysis and the metadata from  
146 GISAID suggests that travel between Asian countries contributed to the rapid spread  
147 of this unique Omicron lineage.

148 Finally, this study has limitation, as we have conducted the genomic surveillance in  
149 only one medical center, therefore, the observed dominance of BA.2.3.7 might be due  
150 to clustering of cases.

151

152 **CONCLUSIONS**

153 In conclusion, our genomic dataset is uniquely valuable for understanding how a  
154 major COVID-19 outbreak occurs in a naïve and vaccinated population in Taiwan  
155 with a very limited number of entry events, and the dominant circulation of BA.2.3.7  
156 in Taiwan probably is due to genetic drift or a founder effect, although it is also  
157 possible that increased transmissibility or vaccine evasion played some part. As Asian  
158 countries began to move from zero tolerance to more open COVID-19 policies,  
159 continued surveillance of SARS-CoV-2 using NGS is important. Early detection of  
160 significant viral evolution events in endemic areas will help to minimize any future  
161 disruption due to a new variant.

162

### 163 **ACKNOWLEDGEMENTS**

164 This work was supported by Ministry of Health and Welfare of Taiwan (MOHW110-  
165 TDU-C-222-000010) to S.F.T., by the Research Center for Emerging Viral Infections  
166 from The Featured Areas Research Center Program within the framework of the  
167 Higher Education Sprout Project by the Ministry of Education (MOE) of Taiwan, the  
168 Ministry of Science and Technology (MOST) of Taiwan (MOST 111-2321-B-182-  
169 001, MOST 111-2634-F-182-001, MOST 110-2222-E-182-004, and MOST 111-  
170 2221-E-182-053-MY3), and the National Institute Of Allergy And Infectious  
171 Diseases of the National Institutes of Health under Award Number 5U01AI151698-02  
172 to Y.N.G. and S.R.S.. The authors wish to thank Y Henry Sun and Hsiao-Hui Tso for  
173 critical reading of the manuscript, to Yi-Chun Tsai, Shuo-Peng Chou, Jhen-Rong  
174 Huang, and Yuan-Yu You for sample collection and nucleic acid preparation, to Tai-  
175 Yun Lin, Yu-Chen Huang and Chiao-Chan Wang for library construction and  
176 sequencing operation.

177



178 **AUTHOR CONTRIBUTION**

179 P.L.S. Collecting clinical specimens and performed clinical data analysis.

180 H.C.T. Performing COVIDseq and manuscript preparation

181 Y.N.G. Phylogenetic analyses and manuscript preparation.

182 H.Y.S. Mutation signature analyses and manuscript preparation.

183 R.K. Interpretation and manuscript preparation

184 L.Y.H. Collecting clinical samples, nucleic acid extraction

185 H.Y.Y. Collecting clinical samples, nucleic acid extraction

186 H.Y.K. Clinical data management

187 Y.C.H. Clinical data interpretation

188 Y.F.L. Genomic data analysis

189 H.Y.W. Genomic data analysis

190 Y.L.W. Data interpretation and manuscript preparation

191 C.C.C. Collecting samples and viral analysis

192 T.W.C. Collecting samples and clinical data analysis

193 K.M.L. Establishing protocols and sample processing

194 C.G.H. Establishing protocols and sample processing

195 S.R.S. Virology study and functional analysis

196 W.J.C. Data interpretation and manuscript preparation

197 C.C.W. Project management and manuscript preparation

198 C.J.Y. Project management and manuscript preparation

199 S.F.T. Project management and manuscript preparation

200

201

202

203 **ABOUT THE AUTHORS**

204 Dr. Shao is an assistant professor in the Department of Laboratory Medicine and  
205 Pediatrics, National Taiwan University College of Medicine, Taiwan. Her main  
206 research interests include infectious disease, clinical virology, clinical microbiology,  
207 and vaccines.

208

209 Dr. Tu is postdoctoral fellow in the Institute of Molecular and Genomic Medicine,  
210 National Health Research Institutes, Taiwan. Her research interests include NGS  
211 technology, cancer and genomic research.

212

213 Dr. Gong is an assistant professor in Research Center for Emerging Viral Infections  
214 and International Master Degree Program for Molecular Medicine in Emerging Viral  
215 Infections, Chang Gung University, Taiwan. His research interests include  
216 bioinformatics, phylogenetics, machine learning, and viral evolution.

217

218 The authors wish to thank Y Henry Sun and Hsiao-Hui Tso for critical reading of the  
219 manuscript, Yi-Chun Tsai, Shuo-Peng Chou, Jhen-Rong Huang, and Yuan-Yu You  
220 for sample collection and nucleic acid preparation, and Tai-Yun Lin, Yu-Chen Huang  
221 and Chiao-Chan Wang for library construction and sequencing operation.

## REFERENCES

- 1 WHO. WHO statement regarding cluster of pneumonia cases in Wuhan, China. Jan 9, 2020.
- 2 Zhu, N. *et al.* A Novel Coronavirus from Patients with Pneumonia in China, 2019. *N Engl J Med* **382**, 727-733, doi:10.1056/NEJMoa2001017 (2020).
- 3 Ritchie, H. *et al.* Coronavirus Pandemic (COVID-19). *Published online at OurWorldInData.org*. Retrieved from: 'https://ourworldindata.org/coronavirus' [Online Resource] (2020)
- 4 Jung, A. S. *et al.* National responses to covid-19: drivers, complexities, and uncertainties in the first year of the pandemic. *BMJ* **375**, e068954, doi:10.1136/bmj-2021-068954 (2021).
- 5 Summers, J. *et al.* Potential lessons from the Taiwan and New Zealand health responses to the COVID-19 pandemic. *Lancet Reg Health West Pac* **4**, 100044, doi:10.1016/j.lanwpc.2020.100044 (2020).
- 6 Tsou, H. H. *et al.* A comprehensive evaluation of COVID-19 policies and outcomes in 50 countries and territories. *Sci Rep* **12**, 8802, doi:10.1038/s41598-022-12853-7 (2022).
- 7 Chen, S. C. Taiwan's experience in fighting COVID-19. *Nat Immunol* **22**, 393-394, doi:10.1038/s41590-021-00908-2 (2021).
- 8 Wang, C. J., Ng, C. Y. & Brook, R. H. Response to COVID-19 in Taiwan: Big Data Analytics, New Technology, and Proactive Testing. *JAMA* **323**, 1341-1342, doi:10.1001/jama.2020.3151 (2020).
- 9 Gong, Y. N. *et al.* SARS-CoV-2 genomic surveillance in Taiwan revealed novel ORF8-deletion mutant and clade possibly associated with infections in Middle East. *Emerg Microbes Infect* **9**, 1457-1466, doi:10.1080/22221751.2020.1782271 (2020).
- 10 Lin, C. *et al.* Policy Decisions and Use of Information Technology to Fight COVID-19, Taiwan. *Emerg Infect Dis* **26**, 1506-1512, doi:10.3201/eid2607.200574 (2020).
- 11 Azad, G. K. Identification and molecular characterization of mutations in nucleocapsid phosphoprotein of SARS-CoV-2. *PeerJ* **9**, e10666, doi:10.7717/peerj.10666 (2021).

222 **APPENDIX**

223

224 **METHODS**

225

226 We applied Illumina COVIDSeq amplicon sequencing technology to the whole-  
227 genome analysis of SARS-CoV-2. RNA was extracted from virus-inactivated swab  
228 samples. Complementary DNA synthesis was carried out using the reagents provided  
229 by the manufacturer, by which the SARS-CoV-2 genome underwent reverse  
230 transcription and was then amplified in 98 overlapping amplicons, together with  
231 appropriate human controls. In the final optimized procedure, we processed 384  
232 samples at a time, and analyzed the pooled libraries on a single lane of a S4 chip  
233 using a NovaSeq6000.

234

235 **Patients and RNA extraction**

236

237 Representative samples were collected from National Taiwan University Hospital  
238 Hsinchu Branch (NTU-HCH). Before the major outbreak, nearly 300 samples were  
239 surveyed in January-April, 2022. On the other hand, we sequenced close to 2000  
240 samples during the major outbreak in May, representing approximately 0.1% of the  
241 estimated 2 million confirmed cases of Taiwan. Samples for RNA extraction were  
242 collected in 3 mL sterile viral transport medium (VTM) tubes and consisted of 2405  
243 nasopharyngeal swabs belonging to 2339 patients. RNA was prepared by automated  
244 extraction using TANBead Nucleic Acid Extraction kits REF M665A46 (Taiwan  
245 Advanced Nanotech Inc.) and the QIASymphony SP protocol (QIAGEN). This study  
246 was reviewed and approved by the Research Ethics Committee (110-110-E) of NTU-  
247 HCH.

248

249 **COVIDseq**

250

251 We carried out the sequencing using Illumina COVIDSeq Test kits (RUO version)  
252 according to the manufacturer's instructions. The workflow consists the following  
253 steps: cDNA synthesis, then virus target amplification using V3 nCov-2019 primers,  
254 followed by library preparation and library pooling. Subsequently, 98 SARS-CoV-2  
255 targets and 11 human targets, the latter acting as controls, were analyzed on a  
256 NovaSeq 6000 instrument using 2x151-bp paired-end reads. Next, we used Illumina  
257 DRAGEN COVID Lineage app version 3.5.9 (base on pangolin 4.1.2 pangolin-data  
258 1.12 and NextClade 1.11.0) in the BaseSpace Sequence Hub for rapid analysis.

259

260 **Phylogenetic analysis**

261

262 A set of 1966 NTU-HCH sequences were deposited to the Global Initiative on  
263 Sharing All Influenza Data (GISAID)<sup>1</sup> with the following epi accession numbers:  
264 EPI\_ISL\_14192849 to EPI\_ISL\_14192840, EPI\_ISL\_14191496 to  
265 EPI\_ISL\_14191488, EPI\_ISL\_14191320 to EPI\_ISL\_14190364, and  
266 EPI\_ISL\_14190353 to EPI\_ISL\_14189364. To investigate the global transmission,  
267 249 BA.2.3.7, 282 global, and 403 additional sequences from Taiwanese were  
268 retrieved from GISAID as of July 2022. A total of 2847 sequences, including 1966  
269 from NTU-HCH and 881 reference sequences (Appendix Table 3:  
270 GISAID\_Acknowledgement) that had met the quality standard, were used for the

271 analysis. The phylogenetic tree was initially constructed using Nextstrain CLI  
272 (command-line interface) (version 3.2.5)<sup>2</sup>, and annotated and visualized using ggtree  
273 package<sup>3</sup>.

274

275

276 References

- 1 Shu, Y. & McCauley, J. GISAID: Global initiative on sharing all influenza data - from vision to reality. *Euro Surveill* **22**, doi:10.2807/1560-7917.ES.2017.22.13.30494 (2017).
- 2 Hadfield, J. *et al.* Nextstrain: real-time tracking of pathogen evolution. *Bioinformatics* **34**, 4121-4123, doi:10.1093/bioinformatics/bty407 (2018).
- 3 Yu, G. *et al.* ggtree: an r package for visualization and annotation of phylogenetic trees with their covariates and other associated data. *Methods in Ecology and Evolution* **8**, 28-36, doi: 10.1111/2041-210X.12628 (2017).

277

## **Main Data**

**Table 1. Mutations in the BA.2.3.7 sublineages**

**Table 2. Submitted sequences of SARS-CoV-2 BA2.3.7 from different countries**

**Figure 1. Community outbreaks of COVID-19 in Taiwan**

**Figure 2. Phylogenetic analysis of the SARS-CoV-2 sequences**

**Table 1**  
**Mutations in the BA.2.3.7 sublineages**

| Accumulated mutations* |         |         |          |                     |
|------------------------|---------|---------|----------|---------------------|
|                        | BA.2    | BA.2.3  | BA.2.3.7 | Selected mutations† |
| <b>ORF1a</b>           | S135R   | S135R   | S135R    | A591V               |
|                        |         |         | L631F    | L631F               |
|                        | T842I   | T842I   | T842I    | I1091T              |
|                        | G1307S  | G1307S  | G1307S   |                     |
|                        | L3027F  | A2909V  | A2909V   |                     |
|                        | T3090I  | L3027F  | L3027F   |                     |
|                        | L3201F  | T3090I  | T3090I   |                     |
|                        |         | L3201F  | L3201F   | T3224A              |
|                        | T3255I  | T3255I  | T3255I   |                     |
|                        | P3395H  | P3395H  | P3395H   |                     |
| del3675                | del3675 | del3675 |          |                     |
| del3676                | del3676 | del3676 |          |                     |
| del3677                | del3677 | del3677 | V3683I   |                     |
| <b>S</b>               | T19I    | T19I    | T19I     |                     |
|                        | L24S    | L24S    | L24S     |                     |
|                        | del25   | del25   | del25    |                     |
|                        | del26   | del26   | del26    |                     |
|                        | del27   | del27   | del27    |                     |
|                        |         |         | K97E     | K97E                |
|                        | G142D   | G142D   | G142D    |                     |
|                        | V213G   | V213G   | V213G    |                     |
|                        | G339D   | G339D   | G339D    |                     |
|                        | S371F   | S371F   | S371F    |                     |
|                        | S373P   | S373P   | S373P    |                     |
|                        | S375F   | S375F   | S375F    |                     |
|                        | T376A   | T376A   | T376A    |                     |
|                        | D405N   | D405N   | D405N    |                     |
|                        | R408S   | R408S   | R408S    |                     |
|                        | K417N   | K417N   | K417N    |                     |
|                        | N440K   | N440K   | N440K    |                     |
|                        | S477N   | S477N   | S477N    |                     |
|                        | T478K   | T478K   | T478K    |                     |
|                        | E484A   | E484A   | E484A    |                     |
|                        | Q493R   | Q493R   | Q493R    |                     |
|                        | Q498R   | Q498R   | Q498R    |                     |
|                        | N501Y   | N501Y   | N501Y    |                     |
|                        | Y505H   | Y505H   | Y505H    |                     |
|                        | D614G   | D614G   | D614G    |                     |
|                        | H655Y   | H655Y   | H655Y    |                     |
|                        | N679K   | N679K   | N679K    |                     |
|                        | P681H   | P681H   | P681H    |                     |
|                        | N764K   | N764K   | N764K    |                     |
|                        | D796Y   | D796Y   | D796Y    |                     |
| Q954H                  | Q954H   | Q954H   |          |                     |
| N969K                  | N969K   | N969K   | G1251V   |                     |
| <b>3a</b>              |         | L140F   | L140F    |                     |
|                        | T223I   | T223I   | T223I    |                     |
| <b>N</b>               | P13L    | P13L    | P13L     |                     |
|                        | del31   | del31   | del31    |                     |
|                        | del32   | del32   | del32    |                     |
|                        | del33   | del33   | del33    |                     |
|                        | R203K   | R203K   | R203K    |                     |
|                        | G204R   | G204R   | G204R    |                     |
|                        |         |         | M322I    | M322I               |
| S413R                  | S413R   | S413R   |          |                     |

\* Using SARS-CoV-2 Wuhan-Hu-1 (MN90847.3) as the reference sequence. Mutations in ORF1b, E, M, 6 and 8 are not shown as they are identical between BA.2, BA.2.3 and BA.2.3.7

†Mutations detected in the Omicron lineages are characterized by the current study

**Table 2**  
**Submitted sequences of SARS-CoV-2 BA2.3.7 from different countries**

| Country     | Count |
|-------------|-------|
| Taiwan      | 51    |
| Japan       | 44    |
| USA         | 37    |
| Indonesia   | 27    |
| Hong Kong   | 22    |
| Australia   | 7     |
| Denmark     | 6     |
| Canada      | 5     |
| Singapore   | 4     |
| South Korea | 4     |
| Philippines | 3     |
| Thailand    | 3     |
| France      | 3     |
| Cambodia    | 2     |
| Austria     | 2     |
| Sweden      | 2     |
| Germany     | 2     |
| Spain       | 1     |
| Vietnam     | 1     |
| Slovenia    | 1     |
| New Zealand | 1     |
| Total       | 228   |

\* The case number does not include the contribution from this study.



**Figure 1: Weekly statistics for confirmed cases and sequenced samples, lineages distribution, and mutations prevalence in the NTU-HCH surveillance program.**

This figure was constructed using the publicly available data of Taiwan CDC (<https://nidss.cdc.gov.tw/nndss/disease?id=19CoV>).

**1A.** The number of COVID-19 confirmed cases in Taiwan and the sequenced samples of NTU-HCH from January (the first week) to early June (the 23<sup>rd</sup> week) in 2022.

**1B.** Lineages distribution of NTU-HCH strains. Most of them were identified as BA.1 or BA.2 lineages and sub-lineages annotated with an asterisk sign (\*) before the wave of community outbreak in end of March. Since then, the BA.2.3.7 lineage became the dominant variant circulating in Taiwan.

**1C.** Proportion of the different signature mutations in the period of January 1<sup>st</sup> to June 6<sup>th</sup>, 2022. Note that there was a sharp increase of the Omicron variant 2.3.7 from week 13 (March 27<sup>th</sup>– April 2<sup>nd</sup>) onwards, and the proportion of this Omicron variant remained high for at least ten weeks. The three signature mutations (S:K97E, N:M322I, ORF1a:L631F) of BA.2.3.7 are completely overlapped. A steady increase of sequences positive for S:G1251V was noted from week 14 (April 3<sup>rd</sup>–9<sup>th</sup>) and reached plateau at week 17 (April 24<sup>th</sup>–30<sup>th</sup>).

**Fig. 1A**

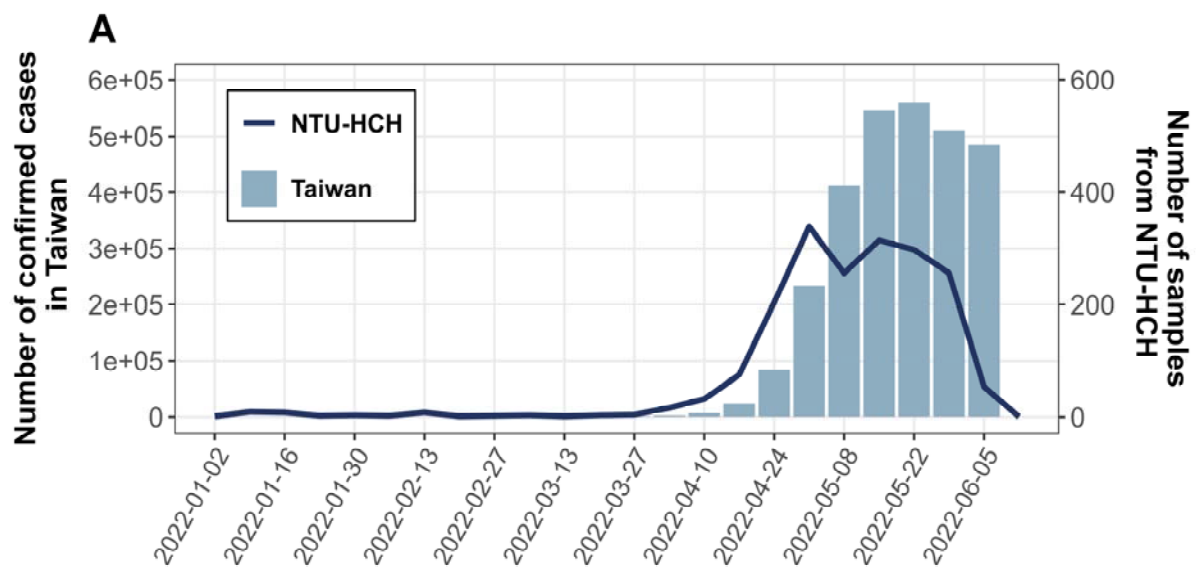

**Fig. 1B**

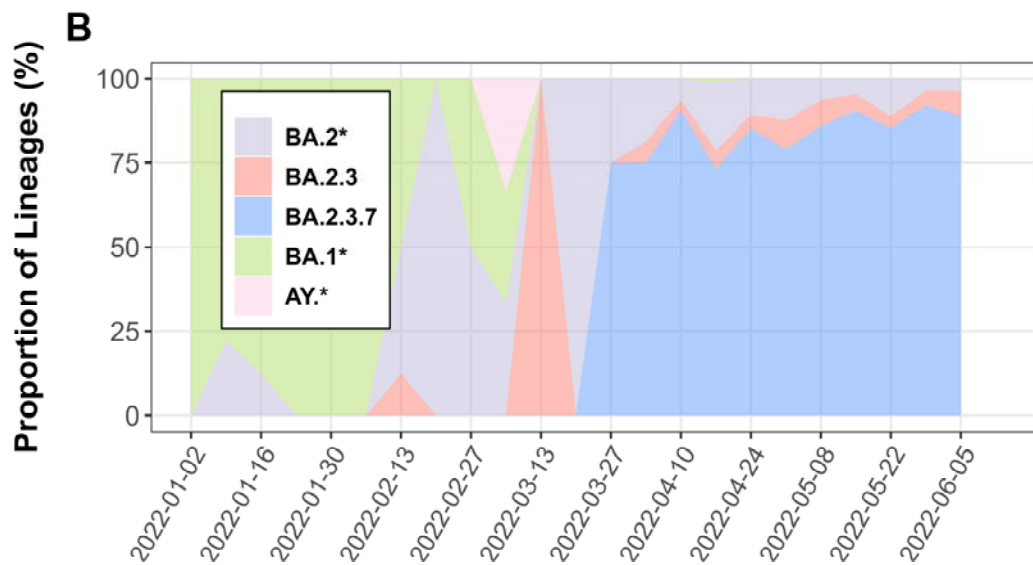

Fig. 1C

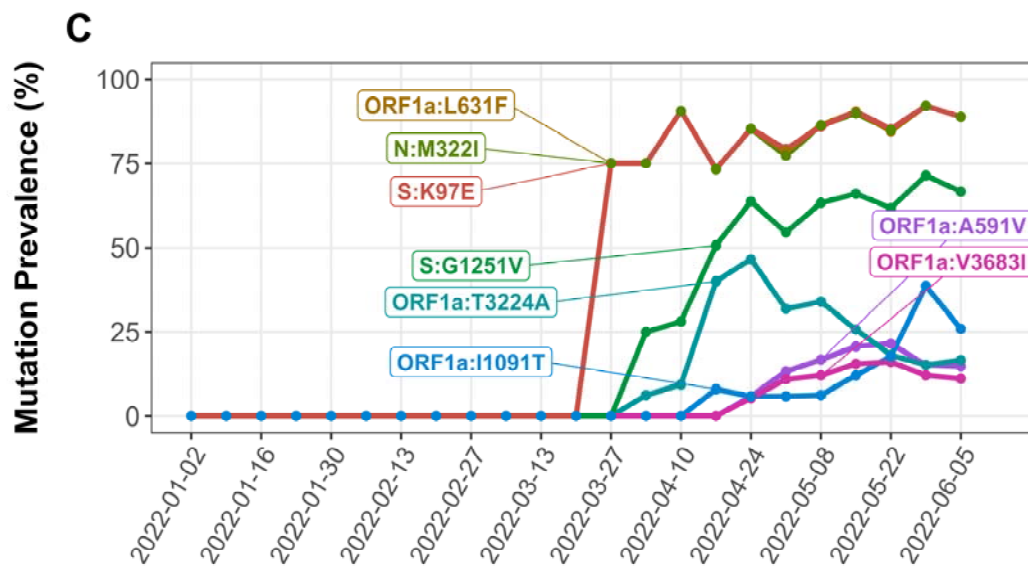

## **Figure 2. Phylogenetic analysis of the SARS-CoV-2 sequences**

**2A.** We used 1966 sequences from NTU-HCH and 881 sequences from GISAID as a framework for constructing the phylogenetic tree. Lineages of NTU-HCH strains are annotated in different colors, and an asterisk sign (\*) represents the collection of a specific lineage with its sub-lineage. The BA.2.3.7 strains were dominantly circulating in Taiwan from March 2022, highlighted by light blue in the tree.

**2B.** We analyzed 1584 BA.2.3.7 sequences submitted to GISAID from the current study together with 228 BA.2.3.7 sequences deposited to GISAID by other groups. The position of signature mutations are indicated; three (S:K97E, N:M322I, ORF 1a:L631F) are located at the origin of the B.A.2.3.7 lineages. S:G1251V is mapped at a major branch in the upper trunk of the tree, under which three minor branches can be defined by mutations in ORF1a:T3224A in blue, ORF1a:A591V and ORF1a:V3683I in purple, and ORF1a:I1091T in orange. Sample origins are color coded. An arrow in red denotes the index case collected from Taiwan on March 27<sup>th</sup>, 2022.

Fig. 2A

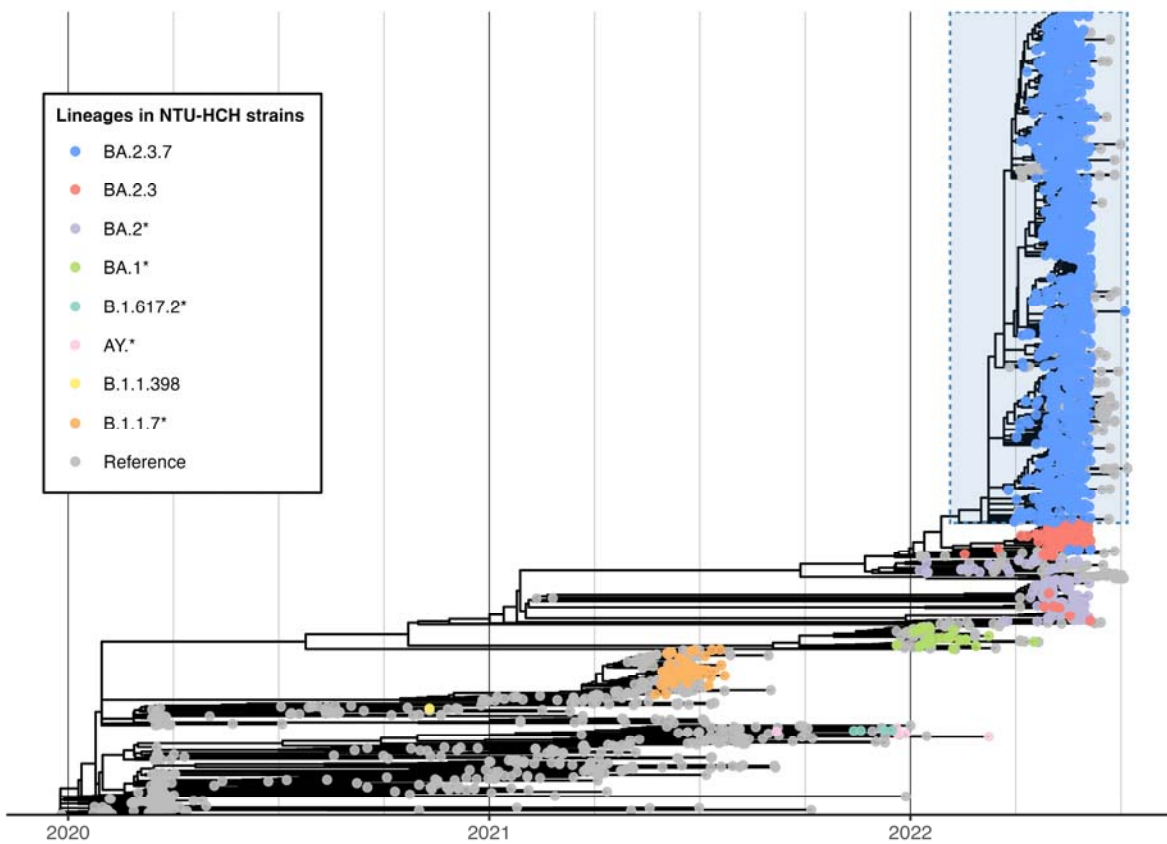

Fig. 2B

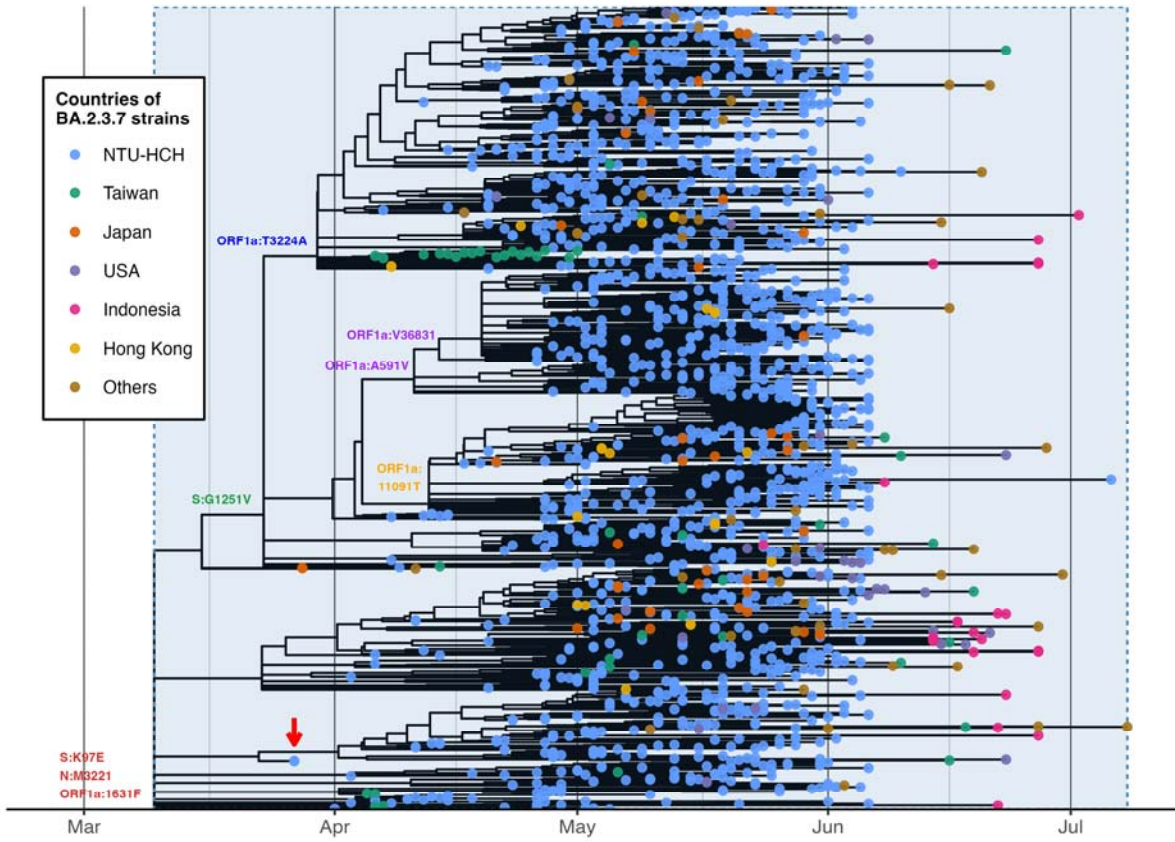

## **Appendix**

### **Appendix Table 1**

**Sequences selected for GISAID submission and phylogenetics analysis.**

**Appendix Table 2. Samples and cases collected for this study as analyzed by the Illumina COVIDSeq system on NovaSeq6000.**

### **Appendix Table 3**

**Acknowledgement of public sequences retrieved from GISAID and NCBI GenBank.**



## Appendix Table 1 Sequences selected for GISAID submission and phylogenetics analysis

| Batch | Run      | Coverage |       |       |       |       |     | Total |
|-------|----------|----------|-------|-------|-------|-------|-----|-------|
|       |          | >=98     | 90-97 | 80-89 | 70-79 | 60-69 | <60 |       |
| 1     | 1        | 77       | 12    | 0     | 4     | 0     | 1   | 94    |
| 2     | 2        | 63       | 0     | 5     | 3     | 4     | 18  | 93    |
| 3     | 3        | 43       | 14    | 4     | 2     | 5     | 38  | 106   |
| 4     | 4        | 140      | 17    | 2     | 3     | 0     | 30  | 192   |
| 5     | 5A       | 360      | 15    | 5     | 2     | 0     | 2   | 384   |
|       | 5B       | 331      | 30    | 11    | 6     | 1     | 5   | 384   |
|       | 5C       | 304      | 47    | 15    | 14    | 4     | 0   | 384   |
|       | 5D       | 366      | 16    | 2     | 0     | 0     | 0   | 384   |
|       | 5E       | 359      | 24    | 0     | 1     | 0     | 0   | 384   |
|       | NTU-HCH* | 1966     | 163   | 44    | 31    | 14    | 93  | 2311  |
|       | Total#   | 2043     | 175   | 44    | 35    | 14    | 94  | 2405  |

\* Count of NTU-HCH cases, from Batch (Run-2) through Batch 5 (Runs 5A-5E)

# Total count of all three hospitals

## Appendix Table 2

### Samples and cases collected for this study as analyzed by the Illumina COVIDSeq system on NovaSeq6000

| Batch | Sampling time period                                    | Hospital source                | Sample number | Case number | Sequencing run                        |
|-------|---------------------------------------------------------|--------------------------------|---------------|-------------|---------------------------------------|
| 1st   | 2021 (May)                                              | WKH 12 CGMH 82                 | 94            | 93          | SP 2x51bp                             |
| 2nd   | 2021 (May-July)                                         | WKH 12* CGMH 82*<br>NTU-HCH 93 | 93#           | 69#         | S4 lane 2x151bp                       |
| 3rd   | 2021 (Dec)~2022 (Feb)+2020(Nov)~2021(April~Nov)11 cases | NTU-HCH 106                    | 106           | 66          | S4 lane 2x151bp                       |
| 4th   | 2022 (Feb 25~April 27)<br>April 27 (1 case)             | NTU-HCH 192                    | 192           | 191         | S4 lane 2x151bp<br>(288 sample/ lane) |
| 5th   | 5A_2022<br>(April 26~May 3)                             | NTU-HCH 384                    | 384           | 384         | S4 lane 2x151bp                       |
|       | 5B_2022<br>(May 3~May 23)                               | NTU-HCH 384                    | 384           | 384         | S4 lane 2x151bp                       |
|       | 5C_2022<br>(May 17~June 6)                              | NTU-HCH 384                    | 384           | 384         | S4 lane 2x151bp                       |
|       | 5D_2022<br>(May 4~June 6)                               | NTU-HCH 384                    | 384           | 384         | S4 lane 2x151bp                       |
|       | 5E_2022<br>(May 18~June 6)<br>+ July 6 (1 case)         | NTU-HCH 384                    | 384           | 384         | S4 lane 2x151bp                       |

\*Repeat from the first batch  
#New samples from NTU-HCH

**Appendix Table 3. Acknowledgement of public sequences retrieved from GISAID and NCBI GenBank.** We gratefully acknowledge the following Authors from the Originating laboratories responsible for obtaining the specimens, as well as the Submitting laboratories where the genome data were generated and shared via GISAID and GenBank, on which this research is based.

| strain                              | gisaid_epi_isl   | genbank_accession | originating_lab                                                                                                                                                                     | submitting_lab                                           | authors                                                                                                                                                                                                                                                                                                                                                                                            |
|-------------------------------------|------------------|-------------------|-------------------------------------------------------------------------------------------------------------------------------------------------------------------------------------|----------------------------------------------------------|----------------------------------------------------------------------------------------------------------------------------------------------------------------------------------------------------------------------------------------------------------------------------------------------------------------------------------------------------------------------------------------------------|
| Wuhan/WH01/2019                     | EPI_ISL_406798   | LR757998          | BGI, Institute of Microbiology, Chinese Academy of Sciences, Shandong First Medical University and General Hospital of Central Theater Command of People's Liberation Army of China | Beijing Genome Institute                                 | Hunter et al                                                                                                                                                                                                                                                                                                                                                                                       |
| Wuhan-Hu-1/2019                     | EPI_ISL_402125   | MN908947          | -                                                                                                                                                                                   | -                                                        | Wu et al                                                                                                                                                                                                                                                                                                                                                                                           |
| Wales/ALDP-BCAAEB/2020              | EPI_ISL_710749   | OD905542          | Lighthouse Lab in Alderley Park                                                                                                                                                     | Wellcome Sanger Institute                                | Wynn et al                                                                                                                                                                                                                                                                                                                                                                                         |
| hCoV-19/Vietnam/NHTD-OUCRU2815/2022 | EPI_ISL_13298595 | -                 | National Hospital for Tropical Diseases                                                                                                                                             | Oxford University Clinical Research Unit, Hanoi, Vietnam | Pham Ngoc Thach, Van Dinh Trang, Le Van Duyet, Nguyen Thi Kim Chi, Vu Ngoc Lien, Nguyen Thi Hang, Nguyen My Hanh, Nguyen Thi Hong Phuong, Tran Thi Van Dung, Ngo Thi Thu Hang, Nguyen Thi Nhu Ha, Luu Thi Dieu Lien, Nguyen Thu Trang, Nguyen Thi Hong Thuong, Trinh Cong Dien, Trinh Son Tung, Thomas Kesteman, Nguyen Thi Tam, H.Rogier van Doorn on behalf of the OUCRU COVID-19 research group |
| Vero/RUS/Dubrovka-37/2021           | -                | ON380441          | -                                                                                                                                                                                   | -                                                        | Faizuloev et al                                                                                                                                                                                                                                                                                                                                                                                    |
| USA/WI-UW-189/2020                  | EPI_ISL_428285   | MT706317          | Milwaukee Public Health Department                                                                                                                                                  | UW-Madison                                               | Moreno et al                                                                                                                                                                                                                                                                                                                                                                                       |

|                                       |                      |              |                                       |                                                                  |                                                                                                                                                                                                                                                                                                          |
|---------------------------------------|----------------------|--------------|---------------------------------------|------------------------------------------------------------------|----------------------------------------------------------------------------------------------------------------------------------------------------------------------------------------------------------------------------------------------------------------------------------------------------------|
| hCoV-19/USA/WA-UW-22050797001/2022    | EPI_ISL_1<br>3042178 | -            | UW Virology Lab                       | UW Virology Lab                                                  | Pavitra Roychoudhury, Pooneh Hajian, Seffir T. Wendm, Shah Mohamed Bakhsh, Sarai Luna, Isabel Arnould, Hong Xie, Sean Ellis, Saraswathi Sathees, Keith R Jerome, Alexander Greninger                                                                                                                     |
| USA/WA-UW-2021041573410/2021          | EPI_ISL_1<br>826154  | MZ240582     | -                                     | -                                                                | Roychoudhury et al                                                                                                                                                                                                                                                                                       |
| USA/WA-UW-2021041407333/2021          | EPI_ISL_1<br>785896  | MZ233339     | -                                     | -                                                                | Roychoudhury et al                                                                                                                                                                                                                                                                                       |
| hCoV-19/USA/WA-S20291/2022            | EPI_ISL_1<br>3077945 | -            | Seattle Flu Study                     | Seattle Flu Study                                                | Chris D. Frazar, Jover Lee, Erica Ryke, Luis Gamboa, Evan McDermot, Jeremy Stone, Tom Kolar, Peter D. Han, Thomas R. Sibley, Melissa Truong, Caitlin R. Wolf, Michael Boeckh, Janet A. Englund, Barry R. Lutz, Alpna Waghmare, Cecile Viboud, Lea M. Starita, Jay Shendure, Trevor Bedford, Helen Y. Chu |
| USA/WA-S17899/2022                    | EPI_ISL_9<br>881504  | OM67619<br>2 | Seattle Flu Study                     | Seattle Flu Study submission group                               | Nickerson et al                                                                                                                                                                                                                                                                                          |
| USA/WA-S1018/2020                     | EPI_ISL_4<br>63508   | MT642295     | Washington State Department of Health | Seattle Flu Study submission group                               | Nickerson et al                                                                                                                                                                                                                                                                                          |
| hCoV-19/USA/WA-PHL-022687/2022        | EPI_ISL_1<br>3607984 | -            | Northwest Laboratory                  | Washington State Department of Health Public Health Laboratories | Drew MacKellar, Philip Dykema, Denny Russell, Holly Halstead, Kathryn Sickles, Kristin Roche, Ardizon Valdez, Claire Howell, Alex Latham, JohnAric Peterson, Avi Singh, Rebecca Cao                                                                                                                      |
| hCoV-19/USA/WA-CDC-UW22060631788/2022 | EPI_ISL_1<br>3356469 | -            | UW Virology Lab                       | UW Virology Lab                                                  | Pavitra Roychoudhury, Isabel Arnould, Sarai Luna, Seffir T. Wendm, Pooneh Hajian, Hong Xie, Sean Ellis, Nathan Breit, Keith R Jerome, Patrick Mathias,                                                                                                                                                   |

|                                       |                      |          |                                         |                                                                                                             |                                                                                                                                                                                                                                                                                                                                                                                                                                                                                                                                                                                                                                                                                                                                                                                                                                                                                                               |
|---------------------------------------|----------------------|----------|-----------------------------------------|-------------------------------------------------------------------------------------------------------------|---------------------------------------------------------------------------------------------------------------------------------------------------------------------------------------------------------------------------------------------------------------------------------------------------------------------------------------------------------------------------------------------------------------------------------------------------------------------------------------------------------------------------------------------------------------------------------------------------------------------------------------------------------------------------------------------------------------------------------------------------------------------------------------------------------------------------------------------------------------------------------------------------------------|
|                                       |                      |          |                                         |                                                                                                             | Alexander Greninger                                                                                                                                                                                                                                                                                                                                                                                                                                                                                                                                                                                                                                                                                                                                                                                                                                                                                           |
| USA/WA-CDC-<br>UW21070817852/2021     | EPI_ISL_3<br>063685  | MZ688283 | UW Virology Lab                         | CDC-OAMD                                                                                                    | Howard et al                                                                                                                                                                                                                                                                                                                                                                                                                                                                                                                                                                                                                                                                                                                                                                                                                                                                                                  |
| USA/WA-CDC-<br>UW21050348508/2021     | EPI_ISL_2<br>104864  | MZ217580 | UW Virology Lab                         | CDC-OAMD                                                                                                    | Howard et al                                                                                                                                                                                                                                                                                                                                                                                                                                                                                                                                                                                                                                                                                                                                                                                                                                                                                                  |
| USA/WA-CDC-<br>QDX36715281/2022       | EPI_ISL_1<br>2874489 | ON574192 | Quest<br>Diagnostics<br>Incorporated    | CDC-OAMD                                                                                                    | Howard et al                                                                                                                                                                                                                                                                                                                                                                                                                                                                                                                                                                                                                                                                                                                                                                                                                                                                                                  |
| USA/WA-CDC-<br>QDX35136286/2022       | EPI_ISL_1<br>1863199 | ON177504 | Quest<br>Diagnostics<br>Incorporated    | CDC-OAMD                                                                                                    | Howard et al                                                                                                                                                                                                                                                                                                                                                                                                                                                                                                                                                                                                                                                                                                                                                                                                                                                                                                  |
| hCoV-19/USA/WA-<br>CDC-LC0736061/2022 | EPI_ISL_1<br>3706296 | -        | Laboratory<br>Corporation of<br>America | Centers for<br>Disease Control<br>and Prevention<br>Division of Viral<br>Diseases,<br>Pathogen<br>Discovery | Dakota Howard,<br>Dhwani Batra, Peter<br>Cook, Jason Caravas,<br>Benjamin Rambo-<br>Martin, Scott<br>Sammons, Yvette<br>Unoarumhi, Matthew<br>Schmerer, Kristine<br>Lacek, Tymeckia<br>Kendall, Victoria<br>Caban Figueroa,<br>Shatavia Morrison,<br>Christopher Gulvick,<br>Mino Agarwal, Eyad<br>Almasri, Debbie Boles,<br>Ayla Burns, Nuthawin<br>Charoensri, Oren<br>Cohen, Susan<br>Countryman, Mary<br>Cristobal, Bobbi Croy,<br>Suzanne Dale,<br>Hrushikesh<br>Deshmukh, Amanda<br>Douglas, Vincent<br>Drouillon, Marcia<br>Eisenberg, Howard<br>Engler, Rama Ghatti,<br>Prashant Gupta, Susan<br>Hicks, Jake Humphrey,<br>Lax Iyer, Lisa Pfeifferle,<br>Manoj Jain, Matthew<br>Robinson, Mohan<br>Kolli, Brian Krueger,<br>Tim Kuphal, Stanley<br>Letovsky, Michael<br>Levandoski, Craig<br>Lukasik, Jonathan<br>Meltzer, Brian Norvell,<br>Mindy Nye, Scott<br>Parker, Christos<br>Petropoulos, John |

|                                         |                      |              |                                                                |                                                                                     |   |                                                                                                                                                                                                                                                                                                |
|-----------------------------------------|----------------------|--------------|----------------------------------------------------------------|-------------------------------------------------------------------------------------|---|------------------------------------------------------------------------------------------------------------------------------------------------------------------------------------------------------------------------------------------------------------------------------------------------|
|                                         |                      |              |                                                                |                                                                                     |   | Pruitt, Steven Ragan, Scott Ryan, Mike Sapeta, Jana Schroth, Suresh Selvaraju, Goran Stevovic, Amanda Suchanek, Andrea Throop, Lyndon Tilson, Thomas Urban, Joe Voshell, Kimberly Wagner, Jonathan Williams, Mary Williamson, Qian Zeng, Tricia Zwiefelhofer, Clinton Paden, Duncan MacCannell |
| USA/WA-CDC-LC0044750/2021               | EPI_ISL_4<br>378085  | OK233071     | -                                                              | -                                                                                   | - | Howard et al                                                                                                                                                                                                                                                                                   |
| USA/WA-CDC-2-4044417/2020               | EPI_ISL_9<br>03955   | MW55053<br>4 | -                                                              | -                                                                                   | - | Queen et al                                                                                                                                                                                                                                                                                    |
| USA/VT-CDCBI-CRSP_3VZDJZSOUCL3Y4HH/2022 | EPI_ISL_1<br>0714527 | OM91738<br>6 | Broad Institute<br>Clinical Research<br>Sequencing<br>Platform | Broad Institute<br>Genomic Center<br>for Infectious<br>Diseases                     |   | Lemieux et al                                                                                                                                                                                                                                                                                  |
| USA/VSP1078/2021                        | EPI_ISL_3<br>022446  | MZ578660     | -                                                              | -                                                                                   | - | McCormick et al                                                                                                                                                                                                                                                                                |
| USA/VA-CDC-LC0259435/2021               | EPI_ISL_4<br>484225  | OK279472     | -                                                              | -                                                                                   | - | Howard et al                                                                                                                                                                                                                                                                                   |
| USA/UW21040143381/2021                  | EPI_ISL_1<br>0515196 | OM89793<br>0 | -                                                              | -                                                                                   | - | Roychoudhury et al                                                                                                                                                                                                                                                                             |
| hCoV-19/USA/UT-UPHL-220607768850/2022   | EPI_ISL_1<br>3166800 | -            | Utah Public<br>Health<br>Laboratory                            | Utah Public<br>Health<br>Laboratory                                                 |   | Erin L. Young, Kelly F. Oakeson, Pooja Gupta, John Arnn, Tom Iverson, Olinto Linares-Perdomo                                                                                                                                                                                                   |
| hCoV-19/USA/UT-UPHL-220607177130/2022   | EPI_ISL_1<br>3166755 | -            | Utah Public<br>Health<br>Laboratory                            | Utah Public<br>Health<br>Laboratory                                                 |   | Erin L. Young, Kelly F. Oakeson, Pooja Gupta, John Arnn, Tom Iverson, Olinto Linares-Perdomo                                                                                                                                                                                                   |
| hCoV-19/USA/UT-UPHL-220530512538/2022   | EPI_ISL_1<br>3057604 | -            | Utah Public<br>Health<br>Laboratory                            | Utah Public<br>Health<br>Laboratory                                                 |   | Erin L. Young, Kelly F. Oakeson, Pooja Gupta, John Arnn, Tom Iverson, Olinto Linares-Perdomo                                                                                                                                                                                                   |
| USA/UT-UPHL-220315872276/2022           | -                    | ON051971     | Utah Public<br>Health<br>Laboratory                            | Utah Public<br>Health<br>Laboratory<br>Infectious<br>Disease<br>submission<br>group |   | Linares-Perdomo et al                                                                                                                                                                                                                                                                          |

|                               |                     |              |                                           |                                                                       |                       |
|-------------------------------|---------------------|--------------|-------------------------------------------|-----------------------------------------------------------------------|-----------------------|
| USA/UT-UPHL-210921010790/2021 | -                   | OK254222     | Utah Public Health Laboratory             | Utah Public Health Laboratory Infectious Disease submission group     | Linares-Perdomo et al |
| USA/UT-UPHL-210820369191/2021 | EPI_ISL_3<br>833172 | OK039691     | Utah Public Health Laboratory             | Utah Public Health Laboratory Infectious Disease submission group     | Linares et al         |
| USA/UT-UPHL-210721062026/2021 | -                   | MZ647049     | Utah Public Health Laboratory             | Utah Public Health Laboratory Infectious Disease submission group     | Linares-Perdomo et al |
| USA/UT-UPHL-2104536561/2020   | EPI_ISL_2<br>496754 | MZ373660     | Utah Public Health Laboratory             | Utah Public Health Laboratory Infectious Disease submission group     | Gallagher et al       |
| USA/UT-UPHL-2104190675/2021   | EPI_ISL_2<br>081706 | MZ189550     | Utah Public Health Laboratory             | Utah Public Health Laboratory Infectious Disease submission group     | Gallagher et al       |
| USA/UT-CDC-LC0016319/2021     | EPI_ISL_1<br>161717 | MW70620<br>0 | -                                         | -                                                                     | Cook et al            |
| USA/TX-HHD-210713KVI5991/2021 | EPI_ISL_2<br>968665 | MZ569173     | -                                         | -                                                                     | Penn et al            |
| USA/TX-DSHS-3811/2020         | -                   | MW80922<br>1 | Texas Department of State Health Services | Texas Department of State Health Services-SARS-CoV-2 submission group | Pokharel et al        |
| USA/TX-DSHS-0564/2020         | EPI_ISL_5<br>74466  | MW09347<br>9 | Texas Department of State Health Services | Texas Department of State Health Services-SARS-CoV-2 submission       | Tuladhar et al        |

|                                       |                      |          |                                | group                                                                                     |                                                                                                                                                                                                                                                                                             |
|---------------------------------------|----------------------|----------|--------------------------------|-------------------------------------------------------------------------------------------|---------------------------------------------------------------------------------------------------------------------------------------------------------------------------------------------------------------------------------------------------------------------------------------------|
| USA/TX-CDC-STM-ZC2Q6VKJT/2022         | -                    | ON718555 | 'Helix'                        | CDC-OAMD                                                                                  | Howard et al                                                                                                                                                                                                                                                                                |
| USA/TX-CDC-STM-S5C5FQPH7/2022         | -                    | ON899107 | 'Helix'                        | CDC-OAMD                                                                                  | Howard et al                                                                                                                                                                                                                                                                                |
| hCoV-19/USA/TX-CDC-STM-HU4B4YA6Y/2022 | EPI_ISL_1<br>3191405 | -        | Helix                          | Centers for Disease Control and Prevention Division of Viral Diseases, Pathogen Discovery | Dakota Howard, Dhwani Batra, Peter Cook, Jason Caravas, Benjamin Rambo-Martin, Scott Sammons, Yvette Unoarumhi, Matthew Schmerer, Kristine Lacek, Tymeckia Kendall, Victoria Caban Figueroa, Helix CA, Shatavia Morrison, Christopher Gulvick, Erisa Sula, Clinton Paden, Duncan MacCannell |
| hCoV-19/USA/TX-CDC-STM-76E3V82K2/2022 | EPI_ISL_1<br>3423378 | -        | Helix                          | Centers for Disease Control and Prevention Division of Viral Diseases, Pathogen Discovery | Dakota Howard, Dhwani Batra, Peter Cook, Jason Caravas, Benjamin Rambo-Martin, Scott Sammons, Yvette Unoarumhi, Matthew Schmerer, Kristine Lacek, Tymeckia Kendall, Victoria Caban Figueroa, Helix CA, Shatavia Morrison, Christopher Gulvick, Erisa Sula, Clinton Paden, Duncan MacCannell |
| hCoV-19/USA/TX-CDC-QDX37100883/2022   | EPI_ISL_1<br>3116042 | -        | Quest Diagnostics Incorporated | Centers for Disease Control and Prevention Division of Viral Diseases, Pathogen Discovery | Dakota Howard, Dhwani Batra, Peter Cook, Jason Caravas, Benjamin Rambo-Martin, Scott Sammons, Yvette Unoarumhi, Matthew Schmerer, Kristine Lacek, Tymeckia Kendall, Victoria Caban Figueroa, Shatavia Morrison, Christopher Gulvick, Erisa Sula, S. Rosenthal, A.                           |



|                                     |                      |              |                                         |                                                                                                             |                                                                                                                                                                                                                                                                                                                                                                                                                                                                                                                                       |
|-------------------------------------|----------------------|--------------|-----------------------------------------|-------------------------------------------------------------------------------------------------------------|---------------------------------------------------------------------------------------------------------------------------------------------------------------------------------------------------------------------------------------------------------------------------------------------------------------------------------------------------------------------------------------------------------------------------------------------------------------------------------------------------------------------------------------|
|                                     |                      |              |                                         |                                                                                                             | Gerasimova, R. Kagan, B. Anderson, M. Hua, Y. Liu, L. Bernstein, K. Livingston, A. Perez, I. Shlyakhter, R. Rolando, R. Owen, P. Tanpaiboon, F. Lacbawan, Clinton Paden, Duncan MacCannell                                                                                                                                                                                                                                                                                                                                            |
| hCoV-19/USA/TX-CDC-QDX37100882/2022 | EPI_ISL_1<br>3117114 | -            | Quest<br>Diagnostics<br>Incorporated    | Centers for<br>Disease Control<br>and Prevention<br>Division of Viral<br>Diseases,<br>Pathogen<br>Discovery | Dakota Howard,<br>Dhwani Batra, Peter<br>Cook, Jason Caravas,<br>Benjamin Rambo-<br>Martin, Scott<br>Sammons, Yvette<br>Unoarumhi, Matthew<br>Schmerer, Kristine<br>Lacek, Tymeckia<br>Kendall, Victoria<br>Caban Figueroa,<br>Shatavia Morrison,<br>Christopher Gulvick,<br>Erisa Sula, S.<br>Rosenthal, A.<br>Gerasimova, R. Kagan,<br>B. Anderson, M. Hua,<br>Y. Liu, L. Bernstein, K.<br>Livingston, A. Perez, I.<br>Shlyakhter, R.<br>Rolando, R. Owen, P.<br>Tanpaiboon, F.<br>Lacbawan, Clinton<br>Paden, Duncan<br>MacCannell |
| USA/TX-CDC-QDX25890825/2021         | EPI_ISL_4<br>368055  | OK249249     | -                                       | -                                                                                                           | Howard et al                                                                                                                                                                                                                                                                                                                                                                                                                                                                                                                          |
| USA/TX-CDC-QDX24603711/2021         | EPI_ISL_4<br>370309  | OK250592     | -                                       | -                                                                                                           | Howard et al                                                                                                                                                                                                                                                                                                                                                                                                                                                                                                                          |
| USA/TX-CDC-QDX23916643/2021         | EPI_ISL_1<br>906845  | MZ090520     | -                                       | -                                                                                                           | Howard et al                                                                                                                                                                                                                                                                                                                                                                                                                                                                                                                          |
| USA/TX-CDC-QDX22285247/2021         | EPI_ISL_1<br>220717  | MW72873<br>3 | -                                       | -                                                                                                           | Cook et al                                                                                                                                                                                                                                                                                                                                                                                                                                                                                                                            |
| USA/TX-CDC-LC0105515/2021           | EPI_ISL_3<br>430808  | MZ743656     | Laboratory<br>Corporation of<br>America | CDC-OAMD                                                                                                    | Howard et al                                                                                                                                                                                                                                                                                                                                                                                                                                                                                                                          |
| USA/TX-CDC-LC0097101/2021           | EPI_ISL_3<br>113239  | MZ850683     | Laboratory<br>Corporation of<br>America | CDC-OAMD                                                                                                    | Howard et al                                                                                                                                                                                                                                                                                                                                                                                                                                                                                                                          |
| USA/TX-CDC-LC0073732/2021           | EPI_ISL_4<br>381556  | OK234786     | -                                       | -                                                                                                           | Howard et al                                                                                                                                                                                                                                                                                                                                                                                                                                                                                                                          |
| USA/TX-CDC-                         | EPI_ISL_3            | OK014715     | -                                       | -                                                                                                           | Howard et al                                                                                                                                                                                                                                                                                                                                                                                                                                                                                                                          |

|                                   |                      |              |                                         |                                                                                           |                                                                                                                                                                                                                                                                                                                                                     |
|-----------------------------------|----------------------|--------------|-----------------------------------------|-------------------------------------------------------------------------------------------|-----------------------------------------------------------------------------------------------------------------------------------------------------------------------------------------------------------------------------------------------------------------------------------------------------------------------------------------------------|
| ASC210209149/2021                 | 820902               |              |                                         |                                                                                           |                                                                                                                                                                                                                                                                                                                                                     |
| USA/TX-CDC-2-6050958/2022         | -                    | ON926267     | TX-Houston Health Department Laboratory | CDC DVD Genomics and Discovery Team                                                       | Sheth et al                                                                                                                                                                                                                                                                                                                                         |
| USA/TN-CDC-ASC210736786/2022      | EPI_ISL_1<br>1491122 | ON080515     | Aegis Sciences Corporation              | CDC-OAMD                                                                                  | Howard et al                                                                                                                                                                                                                                                                                                                                        |
| USA/TN-CDC-ASC210315284/2021      | EPI_ISL_6<br>068505  | OL398577     | -                                       | -                                                                                         | Howard et al                                                                                                                                                                                                                                                                                                                                        |
| USA/TN-CDC-ASC210187911/2021      | EPI_ISL_3<br>863098  | OK010718     | -                                       | -                                                                                         | Howard et al                                                                                                                                                                                                                                                                                                                                        |
| USA/TN-CDC-ASC210016026/2021      | EPI_ISL_1<br>513430  | MW89184<br>0 | -                                       | -                                                                                         | Howard et al                                                                                                                                                                                                                                                                                                                                        |
| USA/TG935688/2020                 | EPI_ISL_2<br>769301  | MZ917842     | Sonora Quest Laboratories - Phoenix     | The Translational Genomics Research Institute COVID submission group                      | Bowers et al                                                                                                                                                                                                                                                                                                                                        |
| USA/SC-COVID21-1563/2021          | EPI_ISL_2<br>313023  | MZ264360     | -                                       | -                                                                                         | Freeman et al                                                                                                                                                                                                                                                                                                                                       |
| USA/RI-CDCBI-RIDOH_00573/2021     | EPI_ISL_1<br>407362  | MW83475<br>3 | Rhode Island Department of Health       | Broad Institute Genomic Center for Infectious Diseases                                    | Lemieux et al                                                                                                                                                                                                                                                                                                                                       |
| USA/RI-CDC-2-4462205/2021         | EPI_ISL_2<br>645361  | MZ429169     | -                                       | -                                                                                         | Sheth et al                                                                                                                                                                                                                                                                                                                                         |
| USA/PA-CDC-STM-000053943/2021     | EPI_ISL_1<br>804343  | MZ061111     | -                                       | -                                                                                         | Howard et al                                                                                                                                                                                                                                                                                                                                        |
| USA/PA-CDC-QDX36964190/2022       | -                    | ON636708     | Quest Diagnostics Incorporated          | CDC-OAMD                                                                                  | Howard et al                                                                                                                                                                                                                                                                                                                                        |
| hCoV-19/USA/OR-CDC-LC0748914/2022 | EPI_ISL_1<br>3808012 | -            | Laboratory Corporation of America       | Centers for Disease Control and Prevention Division of Viral Diseases, Pathogen Discovery | Dakota Howard, Dhwani Batra, Peter Cook, Jason Caravas, Benjamin Rambo-Martin, Scott Sammons, Yvette Unoarumhi, Matthew Schmerer, Kristine Lacek, Tymeckia Kendall, Victoria Caban Figueroa, Shatavia Morrison, Christopher Gulvick, Minoo Agarwal, Eyad Almasri, Debbie Boles, Ayla Burns, Nuthawin Charoensri, Oren Cohen, Susan Countryman, Mary |

|                                          |                        |                                   |                                  |                                                                                                                                                                                                                                                                                                                                                                                                                                                                                                                                                                                                                                                                                                                                                                                                                                                                                                                                  |
|------------------------------------------|------------------------|-----------------------------------|----------------------------------|----------------------------------------------------------------------------------------------------------------------------------------------------------------------------------------------------------------------------------------------------------------------------------------------------------------------------------------------------------------------------------------------------------------------------------------------------------------------------------------------------------------------------------------------------------------------------------------------------------------------------------------------------------------------------------------------------------------------------------------------------------------------------------------------------------------------------------------------------------------------------------------------------------------------------------|
|                                          |                        |                                   |                                  | <p>Cristobal, Bobbi Croy,<br/> Suzanne Dale,<br/> Hrushikesh<br/> Deshmukh, Amanda<br/> Douglas, Vincent<br/> Drouillon, Marcia<br/> Eisenberg, Howard<br/> Engler, Rama Ghatti,<br/> Prashant Gupta, Susan<br/> Hicks, Jake Humphrey,<br/> Lax Iyer, Lisa Pfeifferle,<br/> Manoj Jain, Matthew<br/> Robinson, Mohan<br/> Kolli, Brian Krueger,<br/> Tim Kuphal, Stanley<br/> Letovsky, Michael<br/> Levandoski, Craig<br/> Lukasik, Jonathan<br/> Meltzer, Brian Norvell,<br/> Mindy Nye, Scott<br/> Parker, Christos<br/> Petropoulos, John<br/> Pruitt, Steven Ragan,<br/> Scott Ryan, Mike<br/> Sapeta, Jana Schroth,<br/> Suresh Selvaraju,<br/> Goran Stevovic,<br/> Amanda Suchanek,<br/> Andrea Throop,<br/> Lyndon Tilson, Thomas<br/> Urban, Joe Voshell,<br/> Kimberly Wagner,<br/> Jonathan Williams,<br/> Mary Williamson, Qian<br/> Zeng, Tricia<br/> Zwiefelhofer, Clinton<br/> Paden, Duncan<br/> MacCannell</p> |
| hCoV-19/USA/NY-PRL-<br>220617_02E19/2022 | EPI_ISL_1 -<br>3480419 | Pandemic<br>Response Lab -<br>NYC | Pandemic<br>Response Lab,<br>R&D | <p>Isabel Fernandez<br/> Escapa, Michael<br/> Hammerling, Melissa<br/> Hopkins, Cybill del<br/> Castillo, William Ward,<br/> Steven Chase, Simran<br/> Chhabria, Sol Rey, Alex<br/> Carpio, Simran Gupta,<br/> Tiara Rivera, Haiping<br/> Hao, Jon Laurent</p>                                                                                                                                                                                                                                                                                                                                                                                                                                                                                                                                                                                                                                                                   |
| hCoV-19/USA/NY-PRL-<br>220516_01C10/2022 | EPI_ISL_1 -<br>2857056 | Pandemic<br>Response Lab -<br>NYC | Pandemic<br>Response Lab,<br>R&D | <p>Isabel Fernandez<br/> Escapa, Michael<br/> Hammerling, Melissa<br/> Hopkins, Cybill del</p>                                                                                                                                                                                                                                                                                                                                                                                                                                                                                                                                                                                                                                                                                                                                                                                                                                   |

|                                   |                      |          |                                   |                                                                                           |                                                                                                                                                                                                                                                                                                                                                                                                                                                                                                                                                                                                                                                                                                                                 |
|-----------------------------------|----------------------|----------|-----------------------------------|-------------------------------------------------------------------------------------------|---------------------------------------------------------------------------------------------------------------------------------------------------------------------------------------------------------------------------------------------------------------------------------------------------------------------------------------------------------------------------------------------------------------------------------------------------------------------------------------------------------------------------------------------------------------------------------------------------------------------------------------------------------------------------------------------------------------------------------|
|                                   |                      |          |                                   |                                                                                           | Castillo, William Ward, Steven Chase, Simran Chhabria, Sol Rey, Alex Carpio, Simran Gupta, Tiara Rivera, Haiping Hao, Jon Laurent                                                                                                                                                                                                                                                                                                                                                                                                                                                                                                                                                                                               |
| hCoV-19/USA/NY-NYCPHL-012964/2022 | EPI_ISL_1<br>3263694 | -        | DOHMH PHL                         | New York City Public Health Laboratory                                                    | Jade Wang, et al.                                                                                                                                                                                                                                                                                                                                                                                                                                                                                                                                                                                                                                                                                                               |
| USA/NY-CDC-STM-B8FZA7WQA/2022     | -                    | ON991467 | -                                 | -                                                                                         | Howard et al                                                                                                                                                                                                                                                                                                                                                                                                                                                                                                                                                                                                                                                                                                                    |
| USA/NY-CDC-LC0755132/2022         | -                    | ON977380 | Laboratory Corporation of America | CDC-OAMD                                                                                  | Howard et al                                                                                                                                                                                                                                                                                                                                                                                                                                                                                                                                                                                                                                                                                                                    |
| hCoV-19/USA/NY-CDC-LC0742959/2022 | EPI_ISL_1<br>3780329 | -        | Laboratory Corporation of America | Centers for Disease Control and Prevention Division of Viral Diseases, Pathogen Discovery | Dakota Howard, Dhvani Batra, Peter Cook, Jason Caravas, Benjamin Rambo-Martin, Scott Sammons, Yvette Unoarumhi, Matthew Schmerer, Kristine Lacek, Tymeckia Kendall, Victoria Caban Figueroa, Shatavia Morrison, Christopher Gulvick, Mino Agarwal, Eyad Almasri, Debbie Boles, Ayla Burns, Nuthawin Charoensri, Oren Cohen, Susan Countryman, Mary Cristobal, Bobbi Croy, Suzanne Dale, Hrushikesh Deshmukh, Amanda Douglas, Vincent Drouillon, Marcia Eisenberg, Howard Engler, Rama Ghatti, Prashant Gupta, Susan Hicks, Jake Humphrey, Lax Iyer, Lisa Pfefferle, Manoj Jain, Matthew Robinson, Mohan Kolli, Brian Krueger, Tim Kuphal, Stanley Letovsky, Michael Levandoski, Craig Lukasik, Jonathan Meltzer, Brian Norvell, |

|                                       |                      |              |                                   |                                                                                           |                                                                                                                                                                                                                                                                                                                                                    |
|---------------------------------------|----------------------|--------------|-----------------------------------|-------------------------------------------------------------------------------------------|----------------------------------------------------------------------------------------------------------------------------------------------------------------------------------------------------------------------------------------------------------------------------------------------------------------------------------------------------|
|                                       |                      |              |                                   |                                                                                           | Mindy Nye, Scott Parker, Christos Petropoulos, John Pruitt, Steven Ragan, Scott Ryan, Mike Sapeta, Jana Schroth, Suresh Selvaraju, Goran Stevovic, Amanda Suchanek, Andrea Throop, Lyndon Tilson, Thomas Urban, Joe Voshell, Kimberly Wagner, Jonathan Williams, Mary Williamson, Qian Zeng, Tricia Zwiefelhofer, Clinton Paden, Duncan MacCannell |
| USA/NY-CDC-LC0564597/2022             | EPI_ISL_1<br>1528948 | ON091312     | Laboratory Corporation of America | CDC-OAMD                                                                                  | Howard et al                                                                                                                                                                                                                                                                                                                                       |
| USA/NY-CDC-LC0178784/2021             | EPI_ISL_3<br>746993  | MZ989578     | -                                 | -                                                                                         | Howard et al                                                                                                                                                                                                                                                                                                                                       |
| USA/NY-CDC-2-4282720/2021             | EPI_ISL_1<br>937606  | MZ143754     | -                                 | -                                                                                         | Sheth et al                                                                                                                                                                                                                                                                                                                                        |
| hCoV-19/USA/NV-CDC-STM-SYZPFZGBF/2022 | EPI_ISL_1<br>3423806 | -            | Helix                             | Centers for Disease Control and Prevention Division of Viral Diseases, Pathogen Discovery | Dakota Howard, Dhvani Batra, Peter Cook, Jason Caravas, Benjamin Rambo-Martin, Scott Sammons, Yvette Unoarumhi, Matthew Schmerer, Kristine Lacek, Tymeckia Kendall, Victoria Caban Figueroa, Helix CA, Shatavia Morrison, Christopher Gulvick, Erisa Sula, Clinton Paden, Duncan MacCannell                                                        |
| USA/NV-CDC-FG-261036/2022             | EPI_ISL_9<br>941286  | OM65222<br>9 | Fulgent Genetics                  | CDC-OAMD                                                                                  | Howard et al                                                                                                                                                                                                                                                                                                                                       |
| USA/NV-CDC-ASC210156638/2021          | EPI_ISL_3<br>322135  | MZ745067     | Aegis Sciences Corporation        | CDC-OAMD                                                                                  | Howard et al                                                                                                                                                                                                                                                                                                                                       |
| USA/NM-UNM-TC222428/2020              | EPI_ISL_7<br>018314  | OL706939     | TriCore Reference Laboratories    | The University of New Mexico Health Sciences Center                                       | Domman et al                                                                                                                                                                                                                                                                                                                                       |
| USA/NM-CDC-ASC210027022/2021          | EPI_ISL_1<br>687865  | MZ024295     | -                                 | -                                                                                         | Howard et al                                                                                                                                                                                                                                                                                                                                       |

|                                       |                      |   |                                   |                                                                                                 |                                                                                                                                                                                                                                                                                                                                                                              |
|---------------------------------------|----------------------|---|-----------------------------------|-------------------------------------------------------------------------------------------------|------------------------------------------------------------------------------------------------------------------------------------------------------------------------------------------------------------------------------------------------------------------------------------------------------------------------------------------------------------------------------|
| hCoV-19/USA/NJ-CDC-STM-GNMKC5AMM/2022 | EPI_ISL_1<br>3259144 | - | Helix                             | Centers for Disease Control and Prevention<br>Division of Viral Diseases,<br>Pathogen Discovery | Dakota Howard,<br>Dhwani Batra, Peter Cook, Jason Caravas, Benjamin Rambo-Martin, Scott Sammons, Yvette Unoarumhi, Matthew Schmerer, Kristine Lacek, Tymeckia Kendall, Victoria Caban Figueroa, Helix CA, Shatavia Morrison, Christopher Gulvick, Erisa Sula, Clinton Paden, Duncan MacCannell                                                                               |
| hCoV-19/USA/NJ-CDC-STM-9UPKQ2WEC/2022 | EPI_ISL_1<br>3505734 | - | Helix                             | Centers for Disease Control and Prevention<br>Division of Viral Diseases,<br>Pathogen Discovery | Dakota Howard,<br>Dhwani Batra, Peter Cook, Jason Caravas, Benjamin Rambo-Martin, Scott Sammons, Yvette Unoarumhi, Matthew Schmerer, Kristine Lacek, Tymeckia Kendall, Victoria Caban Figueroa, Helix CA, Shatavia Morrison, Christopher Gulvick, Erisa Sula, Clinton Paden, Duncan MacCannell                                                                               |
| hCoV-19/USA/NJ-CDC-LC0703516/2022     | EPI_ISL_1<br>3550894 | - | Laboratory Corporation of America | Centers for Disease Control and Prevention<br>Division of Viral Diseases,<br>Pathogen Discovery | Dakota Howard,<br>Dhwani Batra, Peter Cook, Jason Caravas, Benjamin Rambo-Martin, Scott Sammons, Yvette Unoarumhi, Matthew Schmerer, Kristine Lacek, Tymeckia Kendall, Victoria Caban Figueroa, Shatavia Morrison, Christopher Gulvick, Mino Agarwal, Eyad Almasri, Debbie Boles, Ayla Burns, Nuthawin Charoensri, Oren Cohen, Susan Countryman, Mary Cristobal, Bobbi Croy, |

|                                         |                      |              |                                         |                                |                                       |                                                                                                                                                                                                                                                                                                                                                                                                                                                                                                                                                                                                                                                                                                                                                                                                                      |
|-----------------------------------------|----------------------|--------------|-----------------------------------------|--------------------------------|---------------------------------------|----------------------------------------------------------------------------------------------------------------------------------------------------------------------------------------------------------------------------------------------------------------------------------------------------------------------------------------------------------------------------------------------------------------------------------------------------------------------------------------------------------------------------------------------------------------------------------------------------------------------------------------------------------------------------------------------------------------------------------------------------------------------------------------------------------------------|
|                                         |                      |              |                                         |                                |                                       | Suzanne Dale,<br>Hrushikesh<br>Deshmukh, Amanda<br>Douglas, Vincent<br>Drouillon, Marcia<br>Eisenberg, Howard<br>Engler, Rama Ghatti,<br>Prashant Gupta, Susan<br>Hicks, Jake Humphrey,<br>Lax Iyer, Lisa Pfefferle,<br>Manoj Jain, Matthew<br>Robinson, Mohan<br>Kolli, Brian Krueger,<br>Tim Kuphal, Stanley<br>Letovsky, Michael<br>Levandoski, Craig<br>Lukasik, Jonathan<br>Meltzer, Brian Norvell,<br>Mindy Nye, Scott<br>Parker, Christos<br>Petropoulos, John<br>Pruitt, Steven Ragan,<br>Scott Ryan, Mike<br>Sapeta, Jana Schroth,<br>Suresh Selvaraju,<br>Goran Stevovic,<br>Amanda Suchanek,<br>Andrea Throop,<br>Lyndon Tilson, Thomas<br>Urban, Joe Voshell,<br>Kimberly Wagner,<br>Jonathan Williams,<br>Mary Williamson, Qian<br>Zeng, Tricia<br>Zwiefelhofer, Clinton<br>Paden, Duncan<br>MacCannell |
| USA/NJ-CDC-<br>LC0593886/2022           | EPI_ISL_1<br>2595024 | ON450672     | Laboratory<br>Corporation of<br>America | CDC-OAMD                       | Howard et al                          |                                                                                                                                                                                                                                                                                                                                                                                                                                                                                                                                                                                                                                                                                                                                                                                                                      |
| USA/NJ-CDC-<br>LC0042358/2021           | EPI_ISL_1<br>683316  | MZ038106     | -                                       | -                              | Howard et al                          |                                                                                                                                                                                                                                                                                                                                                                                                                                                                                                                                                                                                                                                                                                                                                                                                                      |
| USA/NJ-CDC-<br>LC0009660/2021           | EPI_ISL_1<br>031416  | MW64146<br>4 | -                                       | -                              | Cook et al                            |                                                                                                                                                                                                                                                                                                                                                                                                                                                                                                                                                                                                                                                                                                                                                                                                                      |
| USA/NJ-CDC-<br>ASC210593373/2022        | EPI_ISL_9<br>527338  | OM51768<br>0 | Aegis Sciences<br>Corporation           | CDC-OAMD                       | Howard et al                          |                                                                                                                                                                                                                                                                                                                                                                                                                                                                                                                                                                                                                                                                                                                                                                                                                      |
| USA/NJ-CDC-<br>ASC210020462/2021        | EPI_ISL_1<br>650310  | MW96863<br>0 | -                                       | -                              | Howard et al                          |                                                                                                                                                                                                                                                                                                                                                                                                                                                                                                                                                                                                                                                                                                                                                                                                                      |
| USA/NC-CDC-STM-<br>000047276/2021       | EPI_ISL_1<br>690318  | MZ006286     | -                                       | -                              | Howard et al                          |                                                                                                                                                                                                                                                                                                                                                                                                                                                                                                                                                                                                                                                                                                                                                                                                                      |
| hCoV-19/USA/NC-CDC-<br>QDX36866549/2022 | EPI_ISL_1<br>3063848 | -            | Quest<br>Diagnostics                    | Centers for<br>Disease Control | Dakota Howard,<br>Dhwani Batra, Peter |                                                                                                                                                                                                                                                                                                                                                                                                                                                                                                                                                                                                                                                                                                                                                                                                                      |

|                                         |                      |          |                                      |                                                                                                             |                                                                                                                                                                                                                                                                                                                                                                                                                                                                                                                                       |
|-----------------------------------------|----------------------|----------|--------------------------------------|-------------------------------------------------------------------------------------------------------------|---------------------------------------------------------------------------------------------------------------------------------------------------------------------------------------------------------------------------------------------------------------------------------------------------------------------------------------------------------------------------------------------------------------------------------------------------------------------------------------------------------------------------------------|
|                                         |                      |          | Incorporated                         | and Prevention<br>Division of Viral<br>Diseases,<br>Pathogen<br>Discovery                                   | Cook, Jason Caravas,<br>Benjamin Rambo-<br>Martin, Scott<br>Sammons, Yvette<br>Unoarumhi, Matthew<br>Schmerer, Kristine<br>Lacek, Tymeckia<br>Kendall, Victoria<br>Caban Figueroa,<br>Shatavia Morrison,<br>Christopher Gulvick,<br>Erisa Sula, S.<br>Rosenthal, A.<br>Gerasimova, R. Kagan,<br>B. Anderson, M. Hua,<br>Y. Liu, L. Bernstein, K.<br>Livingston, A. Perez, I.<br>Shlyakhter, R.<br>Rolando, R. Owen, P.<br>Tanpaiboon, F.<br>Lacbawan, Clinton<br>Paden, Duncan<br>MacCannell                                          |
| hCoV-19/USA/NC-CDC-<br>QDX36219208/2022 | EPI_ISL_1<br>2640530 | -        | Quest<br>Diagnostics<br>Incorporated | Centers for<br>Disease Control<br>and Prevention<br>Division of Viral<br>Diseases,<br>Pathogen<br>Discovery | Dakota Howard,<br>Dhwani Batra, Peter<br>Cook, Jason Caravas,<br>Benjamin Rambo-<br>Martin, Scott<br>Sammons, Yvette<br>Unoarumhi, Matthew<br>Schmerer, Kristine<br>Lacek, Tymeckia<br>Kendall, Victoria<br>Caban Figueroa,<br>Shatavia Morrison,<br>Christopher Gulvick,<br>Erisa Sula, S.<br>Rosenthal, A.<br>Gerasimova, R. Kagan,<br>B. Anderson, M. Hua,<br>Y. Liu, L. Bernstein, K.<br>Livingston, A. Perez, I.<br>Shlyakhter, R.<br>Rolando, R. Owen, P.<br>Tanpaiboon, F.<br>Lacbawan, Clinton<br>Paden, Duncan<br>MacCannell |
| USA/NC-CDC-<br>QDX25890699/2021         | EPI_ISL_4<br>373693  | OK252743 | -                                    | -                                                                                                           | Howard et al                                                                                                                                                                                                                                                                                                                                                                                                                                                                                                                          |
| USA/NC-CDC-<br>LC0729057/2022           | -                    | ON918145 | Laboratory<br>Corporation of         | CDC-OAMD                                                                                                    | Howard et al                                                                                                                                                                                                                                                                                                                                                                                                                                                                                                                          |



| America                               |                      |          |                                         |                                                                                                             |                                                                                                                                                                                                                                                                                                                                                                                                                                                                                                                                                                                                                                                                                                                                                                                                                                                                                                                                                                                                                                                                   |
|---------------------------------------|----------------------|----------|-----------------------------------------|-------------------------------------------------------------------------------------------------------------|-------------------------------------------------------------------------------------------------------------------------------------------------------------------------------------------------------------------------------------------------------------------------------------------------------------------------------------------------------------------------------------------------------------------------------------------------------------------------------------------------------------------------------------------------------------------------------------------------------------------------------------------------------------------------------------------------------------------------------------------------------------------------------------------------------------------------------------------------------------------------------------------------------------------------------------------------------------------------------------------------------------------------------------------------------------------|
| USA/NC-CDC-<br>LC0657054/2022         | -                    | ON659280 | Laboratory<br>Corporation of<br>America | CDC-OAMD                                                                                                    | Howard et al                                                                                                                                                                                                                                                                                                                                                                                                                                                                                                                                                                                                                                                                                                                                                                                                                                                                                                                                                                                                                                                      |
| hCoV-19/USA/NC-CDC-<br>LC0615385/2022 | EPI_ISL_1<br>2764039 | -        | Laboratory<br>Corporation of<br>America | Centers for<br>Disease Control<br>and Prevention<br>Division of Viral<br>Diseases,<br>Pathogen<br>Discovery | Dakota Howard,<br>Dhwani Batra, Peter<br>Cook, Jason Caravas,<br>Benjamin Rambo-<br>Martin, Scott<br>Sammons, Yvette<br>Unoarumhi, Matthew<br>Schmerer, Kristine<br>Lacek, Tymeckia<br>Kendall, Victoria<br>Caban Figueroa,<br>Shatavia Morrison,<br>Christopher Gulvick,<br>Mino Agarwal, Eyad<br>Almasri, Debbie Boles,<br>Ayla Burns, Nuthawin<br>Charoensri, Oren<br>Cohen, Susan<br>Countryman, Mary<br>Cristobal, Bobbi Croy,<br>Suzanne Dale,<br>Hrushikesh<br>Deshmukh, Amanda<br>Douglas, Vincent<br>Drouillon, Marcia<br>Eisenberg, Howard<br>Engler, Rama Ghatti,<br>Prashant Gupta, Susan<br>Hicks, Jake Humphrey,<br>Lax Iyer, Lisa Pfeifferle,<br>Manoj Jain, Matthew<br>Robinson, Mohan<br>Kolli, Brian Krueger,<br>Tim Kuphal, Stanley<br>Letovsky, Michael<br>Levandoski, Craig<br>Lukasik, Jonathan<br>Meltzer, Brian Norvell,<br>Mindy Nye, Scott<br>Parker, Christos<br>Petropoulos, John<br>Pruitt, Steven Ragan,<br>Scott Ryan, Mike<br>Sapeta, Jana Schroth,<br>Suresh Selvaraju,<br>Goran Stevovic,<br>Amanda Suchanek,<br>Andrea Throop, |

|                                   |                      |              |                                                  |                                                                                           |  |                                                                                                                                                                                                                                                                                                                                   |
|-----------------------------------|----------------------|--------------|--------------------------------------------------|-------------------------------------------------------------------------------------------|--|-----------------------------------------------------------------------------------------------------------------------------------------------------------------------------------------------------------------------------------------------------------------------------------------------------------------------------------|
|                                   |                      |              |                                                  |                                                                                           |  | Lyndon Tilson, Thomas Urban, Joe Voshell, Kimberly Wagner, Jonathan Williams, Mary Williamson, Qian Zeng, Tricia Zwiefelhofer, Clinton Paden, Duncan MacCannell                                                                                                                                                                   |
| USA/NC-CDC-LC0598456/2022         | EPI_ISL_1<br>2622384 | ON468091     | Laboratory Corporation of America                | CDC-OAMD                                                                                  |  | Howard et al                                                                                                                                                                                                                                                                                                                      |
| USA/NC-CDC-LC0072832/2021         | EPI_ISL_4<br>381989  | OK235008     | -                                                | -                                                                                         |  | Howard et al                                                                                                                                                                                                                                                                                                                      |
| USA/MS-CDC-ASC210002921/2021      | EPI_ISL_2<br>243568  | MZ260175     | -                                                | -                                                                                         |  | Howard et al                                                                                                                                                                                                                                                                                                                      |
| USA/MN-MDH-4218/2021              | EPI_ISL_1<br>372464  | MW82185<br>8 | -                                                | -                                                                                         |  | Lorentz et al                                                                                                                                                                                                                                                                                                                     |
| USA/MN-MDH-26542/2022             | -                    | ON809103     | -                                                | -                                                                                         |  | Garfin et al                                                                                                                                                                                                                                                                                                                      |
| USA/MN-CDC-QDX24799521/2021       | EPI_ISL_4<br>371392  | OK251326     | -                                                | -                                                                                         |  | Howard et al                                                                                                                                                                                                                                                                                                                      |
| USA/MN-CDC-IBX130834237430/2021   | EPI_ISL_4<br>954947  | OK421063     | -                                                | -                                                                                         |  | Howard et al                                                                                                                                                                                                                                                                                                                      |
| USA/MI-MDHHS-SC41641/2022         | EPI_ISL_1<br>3718529 | ON951934     | Michigan Department of Health and Human Services | Michigan Department of Health and Human Services                                          |  | Blankenship et al                                                                                                                                                                                                                                                                                                                 |
| USA/MI-CDC-QDX37596917/2022       | -                    | ON795484     | Quest Diagnostics Incorporated                   | CDC-OAMD                                                                                  |  | Howard et al                                                                                                                                                                                                                                                                                                                      |
| USA/MI-CDC-QDX22721848/2021       | EPI_ISL_1<br>297786  | MW78303<br>6 | -                                                | -                                                                                         |  | Cook et al                                                                                                                                                                                                                                                                                                                        |
| hCoV-19/USA/MI-CDC-LC0648031/2022 | EPI_ISL_1<br>3149814 | -            | Laboratory Corporation of America                | Centers for Disease Control and Prevention Division of Viral Diseases, Pathogen Discovery |  | Dakota Howard, Dhwani Batra, Peter Cook, Jason Caravas, Benjamin Rambo-Martin, Scott Sammons, Yvette Unoarumhi, Matthew Schmerer, Kristine Lacek, Tymeckia Kendall, Victoria Caban Figueroa, Shatavia Morrison, Christopher Gulvick, Mino Agarwal, Eyad Almasri, Debbie Boles, Ayla Burns, Nuthawin Charoensri, Oren Cohen, Susan |

|                                                 |                     |              |                                                                |                                                                 |               |                                                                                                                                                                                                                                                                                                                                                                                                                                                                                                                                                                                                                                                                                                                                                                                                                                                                     |
|-------------------------------------------------|---------------------|--------------|----------------------------------------------------------------|-----------------------------------------------------------------|---------------|---------------------------------------------------------------------------------------------------------------------------------------------------------------------------------------------------------------------------------------------------------------------------------------------------------------------------------------------------------------------------------------------------------------------------------------------------------------------------------------------------------------------------------------------------------------------------------------------------------------------------------------------------------------------------------------------------------------------------------------------------------------------------------------------------------------------------------------------------------------------|
|                                                 |                     |              |                                                                |                                                                 |               | Countryman, Mary<br>Cristobal, Bobbi Croy,<br>Suzanne Dale,<br>Hrushikesh<br>Deshmukh, Amanda<br>Douglas, Vincent<br>Drouillon, Marcia<br>Eisenberg, Howard<br>Engler, Rama Ghatti,<br>Prashant Gupta, Susan<br>Hicks, Jake Humphrey,<br>Lax Iyer, Lisa Pfeifferle,<br>Manoj Jain, Matthew<br>Robinson, Mohan<br>Kolli, Brian Krueger,<br>Tim Kuphal, Stanley<br>Letovsky, Michael<br>Levandoski, Craig<br>Lukasik, Jonathan<br>Meltzer, Brian Norvell,<br>Mindy Nye, Scott<br>Parker, Christos<br>Petropoulos, John<br>Pruitt, Steven Ragan,<br>Scott Ryan, Mike<br>Sapeta, Jana Schroth,<br>Suresh Selvaraju,<br>Goran Stevovic,<br>Amanda Suchanek,<br>Andrea Throop,<br>Lyndon Tilson, Thomas<br>Urban, Joe Voshell,<br>Kimberly Wagner,<br>Jonathan Williams,<br>Mary Williamson, Qian<br>Zeng, Tricia<br>Zwiefelhofer, Clinton<br>Paden, Duncan<br>MacCannell |
| USA/MD-CDC-<br>QDX37909401/2022                 | -                   | ON868067     | Quest<br>Diagnostics<br>Incorporated                           | CDC-OAMD                                                        | Howard et al  |                                                                                                                                                                                                                                                                                                                                                                                                                                                                                                                                                                                                                                                                                                                                                                                                                                                                     |
| USA/MA-UMASSMED-<br>P001D09/2020                | EPI_ISL_3<br>409221 | OM48498<br>2 | -                                                              | -                                                               | Ward et al    |                                                                                                                                                                                                                                                                                                                                                                                                                                                                                                                                                                                                                                                                                                                                                                                                                                                                     |
| USA/MA-CDCBI-<br>CRSP_VOKPGOKW5DN<br>R3N2E/2021 | EPI_ISL_1<br>971928 | MZ149733     | Broad Institute<br>Clinical Research<br>Sequencing<br>Platform | Broad Institute<br>Genomic Center<br>for Infectious<br>Diseases | Lemieux et al |                                                                                                                                                                                                                                                                                                                                                                                                                                                                                                                                                                                                                                                                                                                                                                                                                                                                     |
| USA/MA-CDCBI-<br>CRSP_U3XH7CM4QCA<br>NR3VF/2022 | -                   | ON722983     | Broad Institute<br>Clinical Research<br>Sequencing<br>Platform | Broad Institute<br>Genomic Center<br>for Infectious<br>Diseases | Lemieux et al |                                                                                                                                                                                                                                                                                                                                                                                                                                                                                                                                                                                                                                                                                                                                                                                                                                                                     |

|                                          |                      |              |                                                                |                                                                                                             |                                                                                                                                                                                                                                                                                                                                           |
|------------------------------------------|----------------------|--------------|----------------------------------------------------------------|-------------------------------------------------------------------------------------------------------------|-------------------------------------------------------------------------------------------------------------------------------------------------------------------------------------------------------------------------------------------------------------------------------------------------------------------------------------------|
| USA/MA-CDCBI-CRSP_M62XFEVCXVNM MVII/2021 | EPI_ISL_1<br>968238  | MZ145690     | Broad Institute<br>Clinical Research<br>Sequencing<br>Platform | Broad Institute<br>Genomic Center<br>for Infectious<br>Diseases                                             | Lemieux et al                                                                                                                                                                                                                                                                                                                             |
| USA/MA-CDCBI-CRSP_G2ISENC65LOUO RDS/2022 | EPI_ISL_9<br>238623  | OM42632<br>7 | Broad Institute<br>Clinical Research<br>Sequencing<br>Platform | Broad Institute<br>Genomic Center<br>for Infectious<br>Diseases                                             | Lemieux et al                                                                                                                                                                                                                                                                                                                             |
| USA/MA-CDCBI-CRSP_CJHVH6PRWRQH COD7/2021 | EPI_ISL_5<br>251134  | OK535633     | Broad Institute<br>Clinical Research<br>Sequencing<br>Platform | Broad Institute<br>Genomic Center<br>for Infectious<br>Diseases                                             | Lemieux et al                                                                                                                                                                                                                                                                                                                             |
| USA/MA-CDC-QDX25316405/2021              | EPI_ISL_2<br>463009  | MZ360019     | -                                                              | -                                                                                                           | Howard et al                                                                                                                                                                                                                                                                                                                              |
| USA/MA-Broad-CRSP_LWATPBO4SZN3 EU77/2022 | EPI_ISL_1<br>2509250 | ON413319     | Broad Institute<br>Clinical Research<br>Sequencing<br>Platform | Broad Institute<br>Genomic Center<br>for Infectious<br>Diseases                                             | Lemieux et al                                                                                                                                                                                                                                                                                                                             |
| USA/LA-CDC-STM-5FSBRAXFA/2022            | -                    | ON892460     | 'Helix'                                                        | CDC-OAMD                                                                                                    | Howard et al                                                                                                                                                                                                                                                                                                                              |
| USA/KY-CDC-LC0757491/2022                | -                    | OP000167     | -                                                              | -                                                                                                           | Howard et al                                                                                                                                                                                                                                                                                                                              |
| USA/KY-CDC-LC0031802/2021                | EPI_ISL_1<br>513682  | MW90194<br>1 | -                                                              | -                                                                                                           | Howard et al                                                                                                                                                                                                                                                                                                                              |
| USA/KS-CDC-LC0008643/2021                | EPI_ISL_1<br>031804  | MW64115<br>9 | -                                                              | -                                                                                                           | Cook et al                                                                                                                                                                                                                                                                                                                                |
| hCoV-19/USA/IN-CDC-STM-Z82YC342P/2022    | EPI_ISL_1<br>3306540 | -            | Helix                                                          | Centers for<br>Disease Control<br>and Prevention<br>Division of Viral<br>Diseases,<br>Pathogen<br>Discovery | Dakota Howard,<br>Dhwani Batra, Peter<br>Cook, Jason Caravas,<br>Benjamin Rambo-<br>Martin, Scott<br>Sammons, Yvette<br>Unoarumhi, Matthew<br>Schmerer, Kristine<br>Lacek, Tymeckia<br>Kendall, Victoria<br>Caban Figueroa, Helix<br>CA, Shatavia Morrison,<br>Christopher Gulvick,<br>Erisa Sula, Clinton<br>Paden, Duncan<br>MacCannell |
| USA/IN-CDC-LC0072801/2021                | EPI_ISL_4<br>381071  | OK234522     | -                                                              | -                                                                                                           | Howard et al                                                                                                                                                                                                                                                                                                                              |
| USA/IL-UW-149/2020                       | EPI_ISL_4<br>27456   | MT706277     | UWHC                                                           | UW-Madison                                                                                                  | Moreno et al                                                                                                                                                                                                                                                                                                                              |
| USA/IL-CDC-STM-MARERTJFC/2022            | -                    | ON958904     | 'Helix'                                                        | CDC-OAMD                                                                                                    | Howard et al                                                                                                                                                                                                                                                                                                                              |
| USA/IL-CDC-QDX37980271/2022              | -                    | ON906743     | Quest<br>Diagnostics<br>Incorporated                           | CDC-OAMD                                                                                                    | Howard et al                                                                                                                                                                                                                                                                                                                              |
| hCoV-19/USA/IL-CDC-                      | EPI_ISL_1            | -            | Laboratory                                                     | Centers for                                                                                                 | Dakota Howard,                                                                                                                                                                                                                                                                                                                            |

|                |         |                        |                                                                               |                                                                                                                                                                                                                                                                                                                                                                                                                                                                                                                                                                                                                                                                                                                                                                                                                                                                                                                                                                                                                      |
|----------------|---------|------------------------|-------------------------------------------------------------------------------|----------------------------------------------------------------------------------------------------------------------------------------------------------------------------------------------------------------------------------------------------------------------------------------------------------------------------------------------------------------------------------------------------------------------------------------------------------------------------------------------------------------------------------------------------------------------------------------------------------------------------------------------------------------------------------------------------------------------------------------------------------------------------------------------------------------------------------------------------------------------------------------------------------------------------------------------------------------------------------------------------------------------|
| LC0731700/2022 | 3645228 | Corporation of America | Disease Control and Prevention Division of Viral Diseases, Pathogen Discovery | Dhwani Batra, Peter Cook, Jason Caravas, Benjamin Rambo-Martin, Scott Sammons, Yvette Unoarumhi, Matthew Schmerer, Kristine Lacek, Tymeckia Kendall, Victoria Caban Figueroa, Shatavia Morrison, Christopher Gulvick, Mino Agarwal, Eyad Almasri, Debbie Boles, Ayla Burns, Nuthawin Charoensri, Oren Cohen, Susan Countryman, Mary Cristobal, Bobbi Croy, Suzanne Dale, Hrushikesh Deshmukh, Amanda Douglas, Vincent Drouillon, Marcia Eisenberg, Howard Engler, Rama Ghatti, Prashant Gupta, Susan Hicks, Jake Humphrey, Lax Iyer, Lisa Pfefferle, Manoj Jain, Matthew Robinson, Mohan Kolli, Brian Krueger, Tim Kuphal, Stanley Letovsky, Michael Levandoski, Craig Lukasik, Jonathan Meltzer, Brian Norvell, Mindy Nye, Scott Parker, Christos Petropoulos, John Pruitt, Steven Ragan, Scott Ryan, Mike Sapeta, Jana Schroth, Suresh Selvaraju, Goran Stevovic, Amanda Suchanek, Andrea Throop, Lyndon Tilson, Thomas Urban, Joe Voshell, Kimberly Wagner, Jonathan Williams, Mary Williamson, Qian Zeng, Tricia |
|----------------|---------|------------------------|-------------------------------------------------------------------------------|----------------------------------------------------------------------------------------------------------------------------------------------------------------------------------------------------------------------------------------------------------------------------------------------------------------------------------------------------------------------------------------------------------------------------------------------------------------------------------------------------------------------------------------------------------------------------------------------------------------------------------------------------------------------------------------------------------------------------------------------------------------------------------------------------------------------------------------------------------------------------------------------------------------------------------------------------------------------------------------------------------------------|

|                                           |                      |              |                               |                                                                                                             |                                                                                                                                                                                                                                                                                                                                           |
|-------------------------------------------|----------------------|--------------|-------------------------------|-------------------------------------------------------------------------------------------------------------|-------------------------------------------------------------------------------------------------------------------------------------------------------------------------------------------------------------------------------------------------------------------------------------------------------------------------------------------|
|                                           |                      |              |                               |                                                                                                             | Zwiefelhofer, Clinton<br>Paden, Duncan<br>MacCannell                                                                                                                                                                                                                                                                                      |
| USA/IL-CDC-<br>ASC210568836/2021          | EPI_ISL_8<br>555468  | OM19844<br>1 | Aegis Sciences<br>Corporation | CDC-OAMD                                                                                                    | Howard et al                                                                                                                                                                                                                                                                                                                              |
| USA/IL-CDC-<br>ASC210017080/2021          | EPI_ISL_4<br>362642  | OK293973     | -                             | -                                                                                                           | Howard et al                                                                                                                                                                                                                                                                                                                              |
| USA/ID-UI-IIDS-<br>U0796/2020             | EPI_ISL_8<br>373405  | OL901547     | Gritman Medical<br>Center     | University of<br>Idaho                                                                                      | Andrews et al                                                                                                                                                                                                                                                                                                                             |
| USA/IA-Noblis-<br>S716B23/2021            | EPI_ISL_5<br>863412  | OK546329     | -                             | Noblis                                                                                                      | Brinkac et al                                                                                                                                                                                                                                                                                                                             |
| USA/GA-CDC-STM-<br>000051346/2021         | EPI_ISL_1<br>734699  | MZ034924     | -                             | -                                                                                                           | Howard et al                                                                                                                                                                                                                                                                                                                              |
| USA/GA-CDC-<br>MMB09687322/2021           | EPI_ISL_4<br>185738  | OK110046     | -                             | -                                                                                                           | Howard et al                                                                                                                                                                                                                                                                                                                              |
| hCoV-19/USA/FL-CDC-<br>STM-Y75FDU6RZ/2022 | EPI_ISL_1<br>3189585 | -            | Helix                         | Centers for<br>Disease Control<br>and Prevention<br>Division of Viral<br>Diseases,<br>Pathogen<br>Discovery | Dakota Howard,<br>Dhwani Batra, Peter<br>Cook, Jason Caravas,<br>Benjamin Rambo-<br>Martin, Scott<br>Sammons, Yvette<br>Unoarumhi, Matthew<br>Schmerer, Kristine<br>Lacek, Tymeckia<br>Kendall, Victoria<br>Caban Figueroa, Helix<br>CA, Shatavia Morrison,<br>Christopher Gulvick,<br>Erisa Sula, Clinton<br>Paden, Duncan<br>MacCannell |
| hCoV-19/USA/FL-CDC-<br>STM-6WKYCSK4Q/2022 | EPI_ISL_1<br>3305916 | -            | Helix                         | Centers for<br>Disease Control<br>and Prevention<br>Division of Viral<br>Diseases,<br>Pathogen<br>Discovery | Dakota Howard,<br>Dhwani Batra, Peter<br>Cook, Jason Caravas,<br>Benjamin Rambo-<br>Martin, Scott<br>Sammons, Yvette<br>Unoarumhi, Matthew<br>Schmerer, Kristine<br>Lacek, Tymeckia<br>Kendall, Victoria<br>Caban Figueroa, Helix<br>CA, Shatavia Morrison,<br>Christopher Gulvick,<br>Erisa Sula, Clinton<br>Paden, Duncan<br>MacCannell |
| USA/FL-CDC-STM-<br>000049517/2021         | EPI_ISL_1<br>680175  | MZ009908     | -                             | -                                                                                                           | Howard et al                                                                                                                                                                                                                                                                                                                              |
| USA/FL-CDC-STM-<br>000019540/2021         | -                    | MW94186<br>3 | -                             | -                                                                                                           | Howard et al                                                                                                                                                                                                                                                                                                                              |
| USA/FL-CDC-                               | EPI_ISL_2            | MZ535058     | -                             | -                                                                                                           | Howard et al                                                                                                                                                                                                                                                                                                                              |

|                                          |                      |              |                                                       |                                                        |                 |
|------------------------------------------|----------------------|--------------|-------------------------------------------------------|--------------------------------------------------------|-----------------|
| QDX26157325/2021                         | 874010               |              |                                                       |                                                        |                 |
| USA/FL-CDC-LC0737772/2022                | -                    | ON941875     | Laboratory Corporation of America                     | CDC-OAMD                                               | Howard et al    |
| USA/FL-CDC-LC0611265/2022                | EPI_ISL_1<br>2756167 | ON534523     | Laboratory Corporation of America                     | CDC-OAMD                                               | Howard et al    |
| USA/FL-CDC-LC0175863/2021                | EPI_ISL_3<br>741634  | MZ985359     | -                                                     | -                                                      | Howard et al    |
| USA/FL-CDC-LC0055050/2021                | EPI_ISL_2<br>045537  | MZ180783     | -                                                     | -                                                      | Howard et al    |
| USA/FL-CDC-LC0040054/2021                | EPI_ISL_1<br>680757  | MZ036167     | -                                                     | -                                                      | Howard et al    |
| USA/FL-CDC-LC0029967/2021                | EPI_ISL_1<br>462639  | MW87075<br>4 | -                                                     | -                                                      | Howard et al    |
| USA/FL-CDC-ASC210558849/2021             | EPI_ISL_8<br>871318  | OM30840<br>1 | Aegis Sciences Corporation                            | CDC-OAMD                                               | Howard et al    |
| USA/FL-CDC-ASC210208781/2021             | EPI_ISL_3<br>820745  | OK014558     | -                                                     | -                                                      | Howard et al    |
| USA/FL-CDC-ASC210187790/2021             | EPI_ISL_3<br>863412  | OK010924     | -                                                     | -                                                      | Howard et al    |
| USA/FL-CDC-ASC210160756/2021             | EPI_ISL_3<br>430580  | MZ742684     | Aegis Sciences Corporation                            | CDC-OAMD                                               | Howard et al    |
| USA/FL-CDC-ASC210106336/2021             | EPI_ISL_2<br>489202  | MZ376006     | -                                                     | -                                                      | Howard et al    |
| USA/FL-CDC-ASC210056818/2021             | EPI_ISL_1<br>996199  | MZ211317     | -                                                     | -                                                      | Howard et al    |
| USA/FL-BPHL-4138/2021                    | EPI_ISL_2<br>567228  | MZ458288     | Florida Bureau of Public Health Laboratories          | FLDOH                                                  | Schmedes et al  |
| USA/FL-BPHL-12000/2021                   | EPI_ISL_5<br>925309  | OL417301     | Florida Bureau of Public Health Laboratories          | FLDOH                                                  | Schmedes et al  |
| USA/FHCRC-3858/2020                      | -                    | MW59330<br>3 | -                                                     | -                                                      | Pyo et al       |
| USA/CT-CDCBI-CRSP_GQFIFR3U5CAY4 PEO/2021 | EPI_ISL_2<br>192590  | MZ256511     | Broad Institute Clinical Research Sequencing Platform | Broad Institute Genomic Center for Infectious Diseases | Lemieux et al   |
| USA/CO-QDX-2403/2020                     | EPI_ISL_6<br>04691   | MW19112<br>6 | Quest Diagnostics                                     | Quest Diagnostics                                      | Rosenthal et al |
| USA/CO-CDPHE-2100549214/2021             | EPI_ISL_1<br>234345  | MW79696<br>5 | CDPHE                                                 | Colorado Department of Public Health and Environment   | Bankers et al   |
| USA/CO-CDPHE-2010113583/2020             | EPI_ISL_4<br>890691  | OK399256     | CDPHE                                                 | Colorado Department of Public Health and Environment   | Bankers et al   |

|                                         |                      |              |                                             |                                                                                                             |                                                                                                                                                                                                                                                                                                                                                                                                                                                                                   |
|-----------------------------------------|----------------------|--------------|---------------------------------------------|-------------------------------------------------------------------------------------------------------------|-----------------------------------------------------------------------------------------------------------------------------------------------------------------------------------------------------------------------------------------------------------------------------------------------------------------------------------------------------------------------------------------------------------------------------------------------------------------------------------|
| USA/CO-CDPHE-2010042618/2020            | EPI_ISL_3<br>943828  | OK136670     | CDPHE                                       | Colorado<br>Department of<br>Public Health<br>and<br>Environment                                            | Bankers et al                                                                                                                                                                                                                                                                                                                                                                                                                                                                     |
| USA/CO-CDC-<br>MMB14560912/2022         | EPI_ISL_1<br>1252333 | ON026769     | Mako Medical                                | CDC-OAMD                                                                                                    | Howard et al                                                                                                                                                                                                                                                                                                                                                                                                                                                                      |
| USA/CO-CDC-2-<br>3992500/2021           | EPI_ISL_1<br>318387  | MW79273<br>1 | -                                           | -                                                                                                           | Queen et al                                                                                                                                                                                                                                                                                                                                                                                                                                                                       |
| hCoV-19/USA/CA-<br>LACPHL-AF11233/2022  | EPI_ISL_1<br>3456148 | -            | Pomona Valley<br>Hospital Medical<br>Center | Los Angeles<br>County Public<br>Health<br>Laboratories                                                      | J. Garrigues et al.                                                                                                                                                                                                                                                                                                                                                                                                                                                               |
| USA/CA-CHLA-<br>PLM04975012/2020        | -                    | MZ622369     | -                                           | -                                                                                                           | Shen et al                                                                                                                                                                                                                                                                                                                                                                                                                                                                        |
| USA/CA-CDPH-<br>3000135358/2021         | EPI_ISL_4<br>926079  | OK421393     | CDPH VBL                                    | California<br>Department of<br>Public Health                                                                | Smith et al                                                                                                                                                                                                                                                                                                                                                                                                                                                                       |
| USA/CA-CDPH-<br>3000119400/2021         | EPI_ISL_8<br>398381  | OM15153<br>9 | CDPH VBL                                    | California<br>Department of<br>Public Health                                                                | Smith et al                                                                                                                                                                                                                                                                                                                                                                                                                                                                       |
| USA/CA-CDPH-<br>3000016177/2021         | EPI_ISL_8<br>635071  | OM25333<br>7 | CDPH VBL                                    | California<br>Department of<br>Public Health                                                                | Smith et al                                                                                                                                                                                                                                                                                                                                                                                                                                                                       |
| USA/CA-CDC-STM-<br>ZM9M99ZK8/2022       | EPI_ISL_1<br>2923609 | ON611605     | 'Helix'                                     | CDC-OAMD                                                                                                    | Howard et al                                                                                                                                                                                                                                                                                                                                                                                                                                                                      |
| USA/CA-CDC-STM-<br>E7WDZWUQC/2022       | -                    | ON717681     | 'Helix'                                     | CDC-OAMD                                                                                                    | Howard et al                                                                                                                                                                                                                                                                                                                                                                                                                                                                      |
| USA/CA-CDC-STM-<br>000045047/2021       | EPI_ISL_1<br>592665  | MW93224<br>8 | -                                           | -                                                                                                           | Howard et al                                                                                                                                                                                                                                                                                                                                                                                                                                                                      |
| hCoV-19/USA/CA-CDC-<br>QDX38045705/2022 | EPI_ISL_1<br>3592575 | -            | Quest<br>Diagnostics<br>Incorporated        | Centers for<br>Disease Control<br>and Prevention<br>Division of Viral<br>Diseases,<br>Pathogen<br>Discovery | Dakota Howard,<br>Dhwani Batra, Peter<br>Cook, Jason Caravas,<br>Benjamin Rambo-<br>Martin, Scott<br>Sammons, Yvette<br>Unoarumhi, Matthew<br>Schmerer, Kristine<br>Lacek, Tymeckia<br>Kendall, Victoria<br>Caban Figueroa,<br>Shatavia Morrison,<br>Christopher Gulvick,<br>Erisa Sula, S.<br>Rosenthal, A.<br>Gerasimova, R. Kagan,<br>B. Anderson, M. Hua,<br>Y. Liu, L. Bernstein, K.<br>Livingston, A. Perez, I.<br>Shlyakhter, R.<br>Rolando, R. Owen, P.<br>Tanpaiboon, F. |



|                                         |                      |   |                                      |                                                                                                                                                                                                                                                                                                                                                                                                                                                                                                                                       |
|-----------------------------------------|----------------------|---|--------------------------------------|---------------------------------------------------------------------------------------------------------------------------------------------------------------------------------------------------------------------------------------------------------------------------------------------------------------------------------------------------------------------------------------------------------------------------------------------------------------------------------------------------------------------------------------|
|                                         |                      |   |                                      | Lacbawan, Clinton<br>Paden, Duncan<br>MacCannell                                                                                                                                                                                                                                                                                                                                                                                                                                                                                      |
| hCoV-19/USA/CA-CDC-<br>QDX37843144/2022 | EPI_ISL_1<br>3469208 | - | Quest<br>Diagnostics<br>Incorporated | Centers for<br>Disease Control<br>and Prevention<br>Division of Viral<br>Diseases,<br>Pathogen<br>Discovery                                                                                                                                                                                                                                                                                                                                                                                                                           |
|                                         |                      |   |                                      | Dakota Howard,<br>Dhwani Batra, Peter<br>Cook, Jason Caravas,<br>Benjamin Rambo-<br>Martin, Scott<br>Sammons, Yvette<br>Unoarumhi, Matthew<br>Schmerer, Kristine<br>Lacek, Tymeckia<br>Kendall, Victoria<br>Caban Figueroa,<br>Shatavia Morrison,<br>Christopher Gulvick,<br>Erisa Sula, S.<br>Rosenthal, A.<br>Gerasimova, R. Kagan,<br>B. Anderson, M. Hua,<br>Y. Liu, L. Bernstein, K.<br>Livingston, A. Perez, I.<br>Shlyakhter, R.<br>Rolando, R. Owen, P.<br>Tanpaiboon, F.<br>Lacbawan, Clinton<br>Paden, Duncan<br>MacCannell |
| hCoV-19/USA/CA-CDC-<br>QDX37800392/2022 | EPI_ISL_1<br>3464652 | - | Quest<br>Diagnostics<br>Incorporated | Centers for<br>Disease Control<br>and Prevention<br>Division of Viral<br>Diseases,<br>Pathogen<br>Discovery                                                                                                                                                                                                                                                                                                                                                                                                                           |
|                                         |                      |   |                                      | Dakota Howard,<br>Dhwani Batra, Peter<br>Cook, Jason Caravas,<br>Benjamin Rambo-<br>Martin, Scott<br>Sammons, Yvette<br>Unoarumhi, Matthew<br>Schmerer, Kristine<br>Lacek, Tymeckia<br>Kendall, Victoria<br>Caban Figueroa,<br>Shatavia Morrison,<br>Christopher Gulvick,<br>Erisa Sula, S.<br>Rosenthal, A.<br>Gerasimova, R. Kagan,<br>B. Anderson, M. Hua,<br>Y. Liu, L. Bernstein, K.<br>Livingston, A. Perez, I.<br>Shlyakhter, R.<br>Rolando, R. Owen, P.<br>Tanpaiboon, F.<br>Lacbawan, Clinton<br>Paden, Duncan               |

|                                         |                      |          |                                      |                                                                                                             |                                                                                                                                                                                                                                                                                                                                                                                                                                                                                                                                       |
|-----------------------------------------|----------------------|----------|--------------------------------------|-------------------------------------------------------------------------------------------------------------|---------------------------------------------------------------------------------------------------------------------------------------------------------------------------------------------------------------------------------------------------------------------------------------------------------------------------------------------------------------------------------------------------------------------------------------------------------------------------------------------------------------------------------------|
|                                         |                      |          |                                      |                                                                                                             | MacCannell                                                                                                                                                                                                                                                                                                                                                                                                                                                                                                                            |
| hCoV-19/USA/CA-CDC-<br>QDX37596192/2022 | EPI_ISL_1<br>3546798 | -        | Quest<br>Diagnostics<br>Incorporated | Centers for<br>Disease Control<br>and Prevention<br>Division of Viral<br>Diseases,<br>Pathogen<br>Discovery | Dakota Howard,<br>Dhwani Batra, Peter<br>Cook, Jason Caravas,<br>Benjamin Rambo-<br>Martin, Scott<br>Sammons, Yvette<br>Unoarumhi, Matthew<br>Schmerer, Kristine<br>Lacek, Tymeckia<br>Kendall, Victoria<br>Caban Figueroa,<br>Shatavia Morrison,<br>Christopher Gulvick,<br>Erisa Sula, S.<br>Rosenthal, A.<br>Gerasimova, R. Kagan,<br>B. Anderson, M. Hua,<br>Y. Liu, L. Bernstein, K.<br>Livingston, A. Perez, I.<br>Shlyakhter, R.<br>Rolando, R. Owen, P.<br>Tanpaiboon, F.<br>Lacbawan, Clinton<br>Paden, Duncan<br>MacCannell |
| USA/CA-CDC-<br>QDX37549809/2022         | -                    | ON761582 | Quest<br>Diagnostics<br>Incorporated | CDC-OAMD                                                                                                    | Howard et al                                                                                                                                                                                                                                                                                                                                                                                                                                                                                                                          |
| hCoV-19/USA/CA-CDC-<br>QDX37346235/2022 | EPI_ISL_1<br>3261675 | -        | Quest<br>Diagnostics<br>Incorporated | Centers for<br>Disease Control<br>and Prevention<br>Division of Viral<br>Diseases,<br>Pathogen<br>Discovery | Dakota Howard,<br>Dhwani Batra, Peter<br>Cook, Jason Caravas,<br>Benjamin Rambo-<br>Martin, Scott<br>Sammons, Yvette<br>Unoarumhi, Matthew<br>Schmerer, Kristine<br>Lacek, Tymeckia<br>Kendall, Victoria<br>Caban Figueroa,<br>Shatavia Morrison,<br>Christopher Gulvick,<br>Erisa Sula, S.<br>Rosenthal, A.<br>Gerasimova, R. Kagan,<br>B. Anderson, M. Hua,<br>Y. Liu, L. Bernstein, K.<br>Livingston, A. Perez, I.<br>Shlyakhter, R.<br>Rolando, R. Owen, P.<br>Tanpaiboon, F.<br>Lacbawan, Clinton                                |

|                                       |                      |              |                                         |                                                                                                             |                                                                                                                                                                                                                                                                                                                                                                                                                                                                                                                                                                                                                                                                                                                                                                                                                                                                                                                                                                                                         |
|---------------------------------------|----------------------|--------------|-----------------------------------------|-------------------------------------------------------------------------------------------------------------|---------------------------------------------------------------------------------------------------------------------------------------------------------------------------------------------------------------------------------------------------------------------------------------------------------------------------------------------------------------------------------------------------------------------------------------------------------------------------------------------------------------------------------------------------------------------------------------------------------------------------------------------------------------------------------------------------------------------------------------------------------------------------------------------------------------------------------------------------------------------------------------------------------------------------------------------------------------------------------------------------------|
|                                       |                      |              |                                         |                                                                                                             | Paden, Duncan<br>MacCannell                                                                                                                                                                                                                                                                                                                                                                                                                                                                                                                                                                                                                                                                                                                                                                                                                                                                                                                                                                             |
| USA/CA-CDC-<br>QDX37144143/2022       | -                    | ON679441     | Quest<br>Diagnostics<br>Incorporated    | CDC-OAMD                                                                                                    | Howard et al                                                                                                                                                                                                                                                                                                                                                                                                                                                                                                                                                                                                                                                                                                                                                                                                                                                                                                                                                                                            |
| USA/CA-CDC-<br>QDX21613497/2021       | EPI_ISL_1<br>088480  | MW67167<br>6 | -                                       | -                                                                                                           | Cook et al                                                                                                                                                                                                                                                                                                                                                                                                                                                                                                                                                                                                                                                                                                                                                                                                                                                                                                                                                                                              |
| hCoV-19/USA/CA-CDC-<br>LC0736697/2022 | EPI_ISL_1<br>3707615 | -            | Laboratory<br>Corporation of<br>America | Centers for<br>Disease Control<br>and Prevention<br>Division of Viral<br>Diseases,<br>Pathogen<br>Discovery | Dakota Howard,<br>Dhwani Batra, Peter<br>Cook, Jason Caravas,<br>Benjamin Rambo-<br>Martin, Scott<br>Sammons, Yvette<br>Unoarumhi, Matthew<br>Schmerer, Kristine<br>Lacek, Tymeckia<br>Kendall, Victoria<br>Caban Figueroa,<br>Shatavia Morrison,<br>Christopher Gulvick,<br>Mino Agarwal, Eyad<br>Almasri, Debbie Boles,<br>Ayla Burns, Nuthawin<br>Charoensri, Oren<br>Cohen, Susan<br>Countryman, Mary<br>Cristobal, Bobbi Croy,<br>Suzanne Dale,<br>Hrushikesh<br>Deshmukh, Amanda<br>Douglas, Vincent<br>Drouillon, Marcia<br>Eisenberg, Howard<br>Engler, Rama Ghatti,<br>Prashant Gupta, Susan<br>Hicks, Jake Humphrey,<br>Lax Iyer, Lisa Pfefferle,<br>Manoj Jain, Matthew<br>Robinson, Mohan<br>Kolli, Brian Krueger,<br>Tim Kuphal, Stanley<br>Letovsky, Michael<br>Levandoski, Craig<br>Lukasik, Jonathan<br>Meltzer, Brian Norvell,<br>Mindy Nye, Scott<br>Parker, Christos<br>Petropoulos, John<br>Pruitt, Steven Ragan,<br>Scott Ryan, Mike<br>Sapeta, Jana Schroth,<br>Suresh Selvaraju, |

|                                       |                        |                                         |                                                                                                             |                                                                                                                                                                                                                                                                                                                                                                                                                                                                                                                                                                                                                                                                                                                                                                                                                                                                                          |
|---------------------------------------|------------------------|-----------------------------------------|-------------------------------------------------------------------------------------------------------------|------------------------------------------------------------------------------------------------------------------------------------------------------------------------------------------------------------------------------------------------------------------------------------------------------------------------------------------------------------------------------------------------------------------------------------------------------------------------------------------------------------------------------------------------------------------------------------------------------------------------------------------------------------------------------------------------------------------------------------------------------------------------------------------------------------------------------------------------------------------------------------------|
|                                       |                        |                                         |                                                                                                             | Goran Stevovic,<br>Amanda Suchanek,<br>Andrea Throop,<br>Lyndon Tilson, Thomas<br>Urban, Joe Voshell,<br>Kimberly Wagner,<br>Jonathan Williams,<br>Mary Williamson, Qian<br>Zeng, Tricia<br>Zwiefelhofer, Clinton<br>Paden, Duncan<br>MacCannell                                                                                                                                                                                                                                                                                                                                                                                                                                                                                                                                                                                                                                         |
| hCoV-19/USA/CA-CDC-<br>LC0704156/2022 | EPI_ISL_1 -<br>3551457 | Laboratory<br>Corporation of<br>America | Centers for<br>Disease Control<br>and Prevention<br>Division of Viral<br>Diseases,<br>Pathogen<br>Discovery | Dakota Howard,<br>Dhwani Batra, Peter<br>Cook, Jason Caravas,<br>Benjamin Rambo-<br>Martin, Scott<br>Sammons, Yvette<br>Unoarumhi, Matthew<br>Schmerer, Kristine<br>Lacek, Tymeckia<br>Kendall, Victoria<br>Caban Figueroa,<br>Shatavia Morrison,<br>Christopher Gulvick,<br>Minoo Agarwal, Eyad<br>Almasri, Debbie Boles,<br>Ayla Burns, Nuthawin<br>Charoensri, Oren<br>Cohen, Susan<br>Countryman, Mary<br>Cristobal, Bobbi Croy,<br>Suzanne Dale,<br>Hrushikesh<br>Deshmukh, Amanda<br>Douglas, Vincent<br>Drouillon, Marcia<br>Eisenberg, Howard<br>Engler, Rama Ghatti,<br>Prashant Gupta, Susan<br>Hicks, Jake Humphrey,<br>Lax Iyer, Lisa Pfefferle,<br>Manoj Jain, Matthew<br>Robinson, Mohan<br>Kolli, Brian Krueger,<br>Tim Kuphal, Stanley<br>Letovsky, Michael<br>Levandoski, Craig<br>Lukasik, Jonathan<br>Meltzer, Brian Norvell,<br>Mindy Nye, Scott<br>Parker, Christos |

|                                           |                      |              |                                         |                                                                                                             |                                                                                                                                                                                                                                                                                                                                           |                                                                                                                                                                                                                                                                                                                                                                  |
|-------------------------------------------|----------------------|--------------|-----------------------------------------|-------------------------------------------------------------------------------------------------------------|-------------------------------------------------------------------------------------------------------------------------------------------------------------------------------------------------------------------------------------------------------------------------------------------------------------------------------------------|------------------------------------------------------------------------------------------------------------------------------------------------------------------------------------------------------------------------------------------------------------------------------------------------------------------------------------------------------------------|
|                                           |                      |              |                                         |                                                                                                             |                                                                                                                                                                                                                                                                                                                                           | Petropoulos, John<br>Pruitt, Steven Ragan,<br>Scott Ryan, Mike<br>Sapeta, Jana Schroth,<br>Suresh Selvaraju,<br>Goran Stevovic,<br>Amanda Suchanek,<br>Andrea Throop,<br>Lyndon Tilson, Thomas<br>Urban, Joe Voshell,<br>Kimberly Wagner,<br>Jonathan Williams,<br>Mary Williamson, Qian<br>Zeng, Tricia<br>Zwiefelhofer, Clinton<br>Paden, Duncan<br>MacCannell |
| USA/CA-CDC-<br>LC0633233/2022             | EPI_ISL_1<br>2890562 | ON593596     | Laboratory<br>Corporation of<br>America | CDC-OAMD                                                                                                    | Howard et al                                                                                                                                                                                                                                                                                                                              |                                                                                                                                                                                                                                                                                                                                                                  |
| USA/CA-CDC-<br>LC0284812/2021             | EPI_ISL_4<br>811830  | OK364989     | -                                       | -                                                                                                           | Howard et al                                                                                                                                                                                                                                                                                                                              |                                                                                                                                                                                                                                                                                                                                                                  |
| USA/CA-CDC-<br>LC0073796/2021             | EPI_ISL_4<br>374758  | OK231331     | -                                       | -                                                                                                           | Howard et al                                                                                                                                                                                                                                                                                                                              |                                                                                                                                                                                                                                                                                                                                                                  |
| USA/CA-CDC-FG-<br>185174/2021             | EPI_ISL_7<br>567955  | OL823952     | Fulgent Genetics                        | CDC-OAMD                                                                                                    | Howard et al                                                                                                                                                                                                                                                                                                                              |                                                                                                                                                                                                                                                                                                                                                                  |
| USA/CA-CDC-FG-<br>042124/2021             | EPI_ISL_4<br>371468  | OK215038     | -                                       | -                                                                                                           | Howard et al                                                                                                                                                                                                                                                                                                                              |                                                                                                                                                                                                                                                                                                                                                                  |
| USA/CA-CDC-FG-<br>010119/2021             | EPI_ISL_1<br>457823  | MW85846<br>3 | -                                       | -                                                                                                           | Howard et al                                                                                                                                                                                                                                                                                                                              |                                                                                                                                                                                                                                                                                                                                                                  |
| USA/CA-CDC-FG-<br>010087/2021             | EPI_ISL_1<br>481947  | MW86615<br>4 | -                                       | -                                                                                                           | Howard et al                                                                                                                                                                                                                                                                                                                              |                                                                                                                                                                                                                                                                                                                                                                  |
| USA/CA-CDC-<br>ASC210248330/2021          | EPI_ISL_3<br>815586  | MZ978662     | -                                       | -                                                                                                           | Howard et al                                                                                                                                                                                                                                                                                                                              |                                                                                                                                                                                                                                                                                                                                                                  |
| hCoV-19/USA/AZ-CDC-<br>STM-YCXXETKS5/2022 | EPI_ISL_1<br>2923601 | -            | Helix                                   | Centers for<br>Disease Control<br>and Prevention<br>Division of Viral<br>Diseases,<br>Pathogen<br>Discovery | Dakota Howard,<br>Dhwani Batra, Peter<br>Cook, Jason Caravas,<br>Benjamin Rambo-<br>Martin, Scott<br>Sammons, Yvette<br>Unoarumhi, Matthew<br>Schmerer, Kristine<br>Lacek, Tymeckia<br>Kendall, Victoria<br>Caban Figueroa, Helix<br>CA, Shatavia Morrison,<br>Christopher Gulvick,<br>Erisa Sula, Clinton<br>Paden, Duncan<br>MacCannell |                                                                                                                                                                                                                                                                                                                                                                  |
| USA/AZ-CDC-<br>LC0731088/2022             | -                    | ON916761     | Laboratory<br>Corporation of            | CDC-OAMD                                                                                                    | Howard et al                                                                                                                                                                                                                                                                                                                              |                                                                                                                                                                                                                                                                                                                                                                  |

|                                       |                      |   | America                                 |                                                                                                             |                                                                                                                                                                                                                                                                                                                                                                                                                                                                                                                                                                                                                                                                                                                                                                                                                                                                                                                                                                                                                                                                                                                                        |
|---------------------------------------|----------------------|---|-----------------------------------------|-------------------------------------------------------------------------------------------------------------|----------------------------------------------------------------------------------------------------------------------------------------------------------------------------------------------------------------------------------------------------------------------------------------------------------------------------------------------------------------------------------------------------------------------------------------------------------------------------------------------------------------------------------------------------------------------------------------------------------------------------------------------------------------------------------------------------------------------------------------------------------------------------------------------------------------------------------------------------------------------------------------------------------------------------------------------------------------------------------------------------------------------------------------------------------------------------------------------------------------------------------------|
| hCoV-19/USA/AZ-CDC-<br>LC0641621/2022 | EPI_ISL_1<br>2923741 | - | Laboratory<br>Corporation of<br>America | Centers for<br>Disease Control<br>and Prevention<br>Division of Viral<br>Diseases,<br>Pathogen<br>Discovery | Dakota Howard,<br>Dhwani Batra, Peter<br>Cook, Jason Caravas,<br>Benjamin Rambo-<br>Martin, Scott<br>Sammons, Yvette<br>Unoarumhi, Matthew<br>Schmerer, Kristine<br>Lacek, Tymeckia<br>Kendall, Victoria<br>Caban Figueroa,<br>Shatavia Morrison,<br>Christopher Gulvick,<br>Minoo Agarwal, Eyad<br>Almasri, Debbie Boles,<br>Ayla Burns, Nuthawin<br>Charoensri, Oren<br>Cohen, Susan<br>Countryman, Mary<br>Cristobal, Bobbi Croy,<br>Suzanne Dale,<br>Hrushikesh<br>Deshmukh, Amanda<br>Douglas, Vincent<br>Drouillon, Marcia<br>Eisenberg, Howard<br>Engler, Rama Ghatti,<br>Prashant Gupta, Susan<br>Hicks, Jake Humphrey,<br>Lax Iyer, Lisa Pfeifferle,<br>Manoj Jain, Matthew<br>Robinson, Mohan<br>Kolli, Brian Krueger,<br>Tim Kuphal, Stanley<br>Letovsky, Michael<br>Levandoski, Craig<br>Lukasik, Jonathan<br>Meltzer, Brian Norvell,<br>Mindy Nye, Scott<br>Parker, Christos<br>Petropoulos, John<br>Pruitt, Steven Ragan,<br>Scott Ryan, Mike<br>Sapeta, Jana Schroth,<br>Suresh Selvaraju,<br>Goran Stevovic,<br>Amanda Suchanek,<br>Andrea Throop,<br>Lyndon Tilson, Thomas<br>Urban, Joe Voshell,<br>Kimberly Wagner, |

|                                             |                      |              |                                                      |                                                                                                                           |                                                                                                                                                                                                                                            |
|---------------------------------------------|----------------------|--------------|------------------------------------------------------|---------------------------------------------------------------------------------------------------------------------------|--------------------------------------------------------------------------------------------------------------------------------------------------------------------------------------------------------------------------------------------|
|                                             |                      |              |                                                      |                                                                                                                           | Jonathan Williams,<br>Mary Williamson, Qian<br>Zeng, Tricia<br>Zwiefelhofer, Clinton<br>Paden, Duncan<br>MacCannell                                                                                                                        |
| USA/AZ-CDC-<br>ASC210243720/2021            | EPI_ISL_4<br>360761  | OK292256     | -                                                    | -                                                                                                                         | Howard et al                                                                                                                                                                                                                               |
| USA/AK-PHL9297/2021                         | EPI_ISL_2<br>467800  | OL469688     | -                                                    | -                                                                                                                         | DeRonde et al                                                                                                                                                                                                                              |
| USA/AK-<br>PHL12626/2021                    | EPI_ISL_4<br>298613  | OK189078     | -                                                    | -                                                                                                                         | DeRonde et al                                                                                                                                                                                                                              |
| USA/1508xG11/2020                           | EPI_ISL_8<br>84512   | MW52145<br>0 | -                                                    | -                                                                                                                         | Tang et al                                                                                                                                                                                                                                 |
| hCoV-<br>19/Thailand/NIC_BKK_<br>18820/2022 | EPI_ISL_1<br>2861833 | -            | Vichaivej<br>International<br>Hospital Nong<br>Khaem | National<br>Institute of<br>Health,<br>Department of<br>Medical<br>Sciences,<br>Ministry of<br>Public Health,<br>Thailand | Pilailuk Okada;<br>Siripaporn Phuygun;<br>Nuttida Thongpramul;<br>Pakorn Piromtong;<br>Natchaya Khiadsang;<br>Thanutsapa<br>Thanadachakul;<br>Sirikanda Wimol;<br>Suratchana Mitrat;<br>Sunthareeya<br>Waicharoen; Archawin<br>Rojanawiwat |
| hCoV-<br>19/Thailand/NIC_BKK_<br>18819/2022 | EPI_ISL_1<br>2861832 | -            | Vichaivej<br>International<br>Hospital Nong<br>Khaem | National<br>Institute of<br>Health,<br>Department of<br>Medical<br>Sciences,<br>Ministry of<br>Public Health,<br>Thailand | Pilailuk Okada;<br>Siripaporn Phuygun;<br>Nuttida Thongpramul;<br>Pakorn Piromtong;<br>Natchaya Khiadsang;<br>Thanutsapa<br>Thanadachakul;<br>Sirikanda Wimol;<br>Suratchana Mitrat;<br>Sunthareeya<br>Waicharoen; Archawin<br>Rojanawiwat |
| hCoV-<br>19/Thailand/NIC_BKK_<br>18713/2022 | EPI_ISL_1<br>2727577 | -            | Vichaivej<br>International<br>Hospital Nong<br>Khaem | National<br>Institute of<br>Health,<br>Department of<br>Medical<br>Sciences,<br>Ministry of<br>Public Health,<br>Thailand | Pilailuk Okada;<br>Siripaporn Phuygun;<br>Nuttida Thongpramul;<br>Pakorn Piromtong;<br>Natchaya Khiadsang;<br>Thanutsapa<br>Thanadachakul;<br>Sirikanda Wimol;<br>Suratchana Mitrat;<br>Sunthareeya<br>Waicharoen; Archawin<br>Rojanawiwat |
| hCoV-<br>19/Taiwan/w3586/202                | EPI_ISL_6<br>39911   | -            | Division of<br>Clinical                              | Institute of<br>Preventive                                                                                                | Tein-Yao Chang,<br>Cheng-Lih Perng,                                                                                                                                                                                                        |

|                             |                      |   |                                         |                                           |                                                                                                                                                                                                                 |
|-----------------------------|----------------------|---|-----------------------------------------|-------------------------------------------|-----------------------------------------------------------------------------------------------------------------------------------------------------------------------------------------------------------------|
| 0                           |                      |   | Pathology, Tri-service General Hospital | Medicine, National Defense Medical Center | Hung-Sheng Shang                                                                                                                                                                                                |
| hCoV-19/Taiwan/TSGH-78/2022 | EPI_ISL_1<br>3539973 | - | TSGH-CP<br>molecular lab                | TSGH-CP<br>molecular lab                  | Cherng-Lih Perng, Ming-Jr JIAN, Chih-Kai Chang, Jung-Chung Lin, Kuo-Ming Yeh, Chien-Wen Chen, Sheng-Kang Chiu, Hsing-Yi Chung, Shih-Hung Tsai, Kuo-Sheng Hung, Tien-Yao Chang, Feng-Yee Chang, Hung-Sheng Shang |
| hCoV-19/Taiwan/TSGH-77/2022 | EPI_ISL_1<br>3393147 | - | TSGH-CP<br>molecular lab                | TSGH-CP<br>molecular lab                  | Cherng-Lih Perng, Ming-Jr JIAN, Chih-Kai Chang, Jung-Chung Lin, Kuo-Ming Yeh, Chien-Wen Chen, Sheng-Kang Chiu, Hsing-Yi Chung, Shih-Hung Tsai, Kuo-Sheng Hung, Tien-Yao Chang, Feng-Yee Chang, Hung-Sheng Shang |
| hCoV-19/Taiwan/TSGH-76/2022 | EPI_ISL_1<br>3393145 | - | TSGH-CP<br>molecular lab                | TSGH-CP<br>molecular lab                  | Cherng-Lih Perng, Ming-Jr JIAN, Chih-Kai Chang, Jung-Chung Lin, Kuo-Ming Yeh, Chien-Wen Chen, Sheng-Kang Chiu, Hsing-Yi Chung, Shih-Hung Tsai, Kuo-Sheng Hung, Tien-Yao Chang, Feng-Yee Chang, Hung-Sheng Shang |
| hCoV-19/Taiwan/TSGH-75/2022 | EPI_ISL_1<br>3393143 | - | TSGH-CP<br>molecular lab                | TSGH-CP<br>molecular lab                  | Cherng-Lih Perng, Ming-Jr JIAN, Chih-Kai Chang, Jung-Chung Lin, Kuo-Ming Yeh, Chien-Wen Chen, Sheng-Kang Chiu, Hsing-Yi Chung, Shih-Hung Tsai, Kuo-Sheng Hung, Tien-Yao Chang, Feng-Yee Chang, Hung-Sheng Shang |
| hCoV-19/Taiwan/TSGH-74/2022 | EPI_ISL_1<br>3393137 | - | TSGH-CP<br>molecular lab                | TSGH-CP<br>molecular lab                  | Cherng-Lih Perng, Ming-Jr JIAN, Chih-Kai Chang, Jung-Chung Lin, Kuo-Ming Yeh,                                                                                                                                   |



|                                     |                      |   |                          |                                                                                                                                                      |                                                                                                                                                                                                                                                |
|-------------------------------------|----------------------|---|--------------------------|------------------------------------------------------------------------------------------------------------------------------------------------------|------------------------------------------------------------------------------------------------------------------------------------------------------------------------------------------------------------------------------------------------|
|                                     |                      |   |                          | Chien-Wen Chen,<br>Sheng-Kang Chiu,<br>Hsing-Yi Chung, Shih-<br>Hung Tsai, Kuo-Sheng<br>Hung, Tien-Yao Chang,<br>Feng-Yee Chang,<br>Hung-Sheng Shang |                                                                                                                                                                                                                                                |
| hCoV-<br>19/Taiwan/TSGH-<br>73/2022 | EPI_ISL_1<br>3199862 | - | TSGH-CP<br>molecular lab | TSGH-CP<br>molecular lab                                                                                                                             | Cherng-Lih Perng,<br>Ming-Jr JIAN, Chih-Kai<br>Chang, Jung-Chung<br>Lin, Kuo-Ming Yeh,<br>Chien-Wen Chen,<br>Sheng-Kang Chiu,<br>Hsing-Yi Chung, Shih-<br>Hung Tsai, Kuo-Sheng<br>Hung, Tien-Yao Chang,<br>Feng-Yee Chang,<br>Hung-Sheng Shang |
| hCoV-<br>19/Taiwan/TSGH-<br>72/2022 | EPI_ISL_1<br>3199860 | - | TSGH-CP<br>molecular lab | TSGH-CP<br>molecular lab                                                                                                                             | Cherng-Lih Perng,<br>Ming-Jr JIAN, Chih-Kai<br>Chang, Jung-Chung<br>Lin, Kuo-Ming Yeh,<br>Chien-Wen Chen,<br>Sheng-Kang Chiu,<br>Hsing-Yi Chung, Shih-<br>Hung Tsai, Kuo-Sheng<br>Hung, Tien-Yao Chang,<br>Feng-Yee Chang,<br>Hung-Sheng Shang |
| hCoV-<br>19/Taiwan/TSGH-<br>71/2022 | EPI_ISL_1<br>3199687 | - | TSGH-CP<br>molecular lab | TSGH-CP<br>molecular lab                                                                                                                             | Cherng-Lih Perng,<br>Ming-Jr JIAN, Chih-Kai<br>Chang, Jung-Chung<br>Lin, Kuo-Ming Yeh,<br>Chien-Wen Chen,<br>Sheng-Kang Chiu,<br>Hsing-Yi Chung, Shih-<br>Hung Tsai, Kuo-Sheng<br>Hung, Tien-Yao Chang,<br>Feng-Yee Chang,<br>Hung-Sheng Shang |
| hCoV-<br>19/Taiwan/TSGH-<br>70/2022 | EPI_ISL_1<br>3199653 | - | TSGH-CP<br>molecular lab | TSGH-CP<br>molecular lab                                                                                                                             | Cherng-Lih Perng,<br>Ming-Jr JIAN, Chih-Kai<br>Chang, Jung-Chung<br>Lin, Kuo-Ming Yeh,<br>Chien-Wen Chen,<br>Sheng-Kang Chiu,<br>Hsing-Yi Chung, Shih-<br>Hung Tsai, Kuo-Sheng<br>Hung, Tien-Yao Chang,<br>Feng-Yee Chang,<br>Hung-Sheng Shang |
| hCoV-                               | EPI_ISL_1            | - | TSGH-CP                  | TSGH-CP                                                                                                                                              | Cherng-Lih Perng,                                                                                                                                                                                                                              |

|                             |                     |  |                       |                       |                                                                                                                                                                                                                 |
|-----------------------------|---------------------|--|-----------------------|-----------------------|-----------------------------------------------------------------------------------------------------------------------------------------------------------------------------------------------------------------|
| 19/Taiwan/TSGH-69/2022      | 1903003             |  | molecular lab         | molecular lab         | Ming-Jr JIAN, Chih-Kai Chang, Jung-Chung Lin, Kuo-Ming Yeh, Chien-Wen Chen, Sheng-Kang Chiu, Hsing-Yi Chung, Shih-Hung Tsai, Kuo-Sheng Hung, Tien-Yao Chang, Feng-Yee Chang, Hung-Sheng Shang                   |
| hCoV-19/Taiwan/TSGH-68/2022 | EPI_ISL_1 - 1903002 |  | TSGH-CP molecular lab | TSGH-CP molecular lab | Cherng-Lih Perng, Ming-Jr JIAN, Chih-Kai Chang, Jung-Chung Lin, Kuo-Ming Yeh, Chien-Wen Chen, Sheng-Kang Chiu, Hsing-Yi Chung, Shih-Hung Tsai, Kuo-Sheng Hung, Tien-Yao Chang, Feng-Yee Chang, Hung-Sheng Shang |
| hCoV-19/Taiwan/TSGH-67/2022 | EPI_ISL_1 - 1903001 |  | TSGH-CP molecular lab | TSGH-CP molecular lab | Cherng-Lih Perng, Ming-Jr JIAN, Chih-Kai Chang, Jung-Chung Lin, Kuo-Ming Yeh, Chien-Wen Chen, Sheng-Kang Chiu, Hsing-Yi Chung, Shih-Hung Tsai, Kuo-Sheng Hung, Tien-Yao Chang, Feng-Yee Chang, Hung-Sheng Shang |
| hCoV-19/Taiwan/TSGH-66/2022 | EPI_ISL_1 - 1903000 |  | TSGH-CP molecular lab | TSGH-CP molecular lab | Cherng-Lih Perng, Ming-Jr JIAN, Chih-Kai Chang, Jung-Chung Lin, Kuo-Ming Yeh, Chien-Wen Chen, Sheng-Kang Chiu, Hsing-Yi Chung, Shih-Hung Tsai, Kuo-Sheng Hung, Tien-Yao Chang, Feng-Yee Chang, Hung-Sheng Shang |
| hCoV-19/Taiwan/TSGH-65/2022 | EPI_ISL_1 - 1902998 |  | TSGH-CP molecular lab | TSGH-CP molecular lab | Cherng-Lih Perng, Ming-Jr JIAN, Chih-Kai Chang, Jung-Chung Lin, Kuo-Ming Yeh, Chien-Wen Chen, Sheng-Kang Chiu, Hsing-Yi Chung, Shih-Hung Tsai, Kuo-Sheng Hung, Tien-Yao Chang,                                  |

|                             |                      |   |                          |                                     |                                                                                                                                                                                                                                                |
|-----------------------------|----------------------|---|--------------------------|-------------------------------------|------------------------------------------------------------------------------------------------------------------------------------------------------------------------------------------------------------------------------------------------|
|                             |                      |   |                          | Feng-Yee Chang,<br>Hung-Sheng Shang |                                                                                                                                                                                                                                                |
| hCoV-19/Taiwan/TSGH-64/2022 | EPI_ISL_1<br>1902997 | - | TSGH-CP<br>molecular lab | TSGH-CP<br>molecular lab            | Cherng-Lih Perng,<br>Ming-Jr JIAN, Chih-Kai<br>Chang, Jung-Chung<br>Lin, Kuo-Ming Yeh,<br>Chien-Wen Chen,<br>Sheng-Kang Chiu,<br>Hsing-Yi Chung, Shih-<br>Hung Tsai, Kuo-Sheng<br>Hung, Tien-Yao Chang,<br>Feng-Yee Chang,<br>Hung-Sheng Shang |
| hCoV-19/Taiwan/TSGH-63/2021 | EPI_ISL_1<br>1147495 | - | TSGH-CP<br>molecular lab | TSGH-CP<br>molecular lab            | Cherng-Lih Perng,<br>Ming-Jr JIAN, Chih-Kai<br>Chang, Jung-Chung<br>Lin, Kuo-Ming Yeh,<br>Chien-Wen Chen,<br>Sheng-Kang Chiu,<br>Hsing-Yi Chung, Shih-<br>Hung Tsai, Kuo-Sheng<br>Hung, Tien-Yao Chang,<br>Feng-Yee Chang,<br>Hung-Sheng Shang |
| hCoV-19/Taiwan/TSGH-62/2022 | EPI_ISL_1<br>1147476 | - | TSGH-CP<br>molecular lab | TSGH-CP<br>molecular lab            | Cherng-Lih Perng,<br>Ming-Jr JIAN, Chih-Kai<br>Chang, Jung-Chung<br>Lin, Kuo-Ming Yeh,<br>Chien-Wen Chen,<br>Sheng-Kang Chiu,<br>Hsing-Yi Chung, Shih-<br>Hung Tsai, Kuo-Sheng<br>Hung, Tien-Yao Chang,<br>Feng-Yee Chang,<br>Hung-Sheng Shang |
| hCoV-19/Taiwan/TSGH-61/2022 | EPI_ISL_1<br>1147460 | - | TSGH-CP<br>molecular lab | TSGH-CP<br>molecular lab            | Cherng-Lih Perng,<br>Ming-Jr JIAN, Chih-Kai<br>Chang, Jung-Chung<br>Lin, Kuo-Ming Yeh,<br>Chien-Wen Chen,<br>Sheng-Kang Chiu,<br>Hsing-Yi Chung, Shih-<br>Hung Tsai, Kuo-Sheng<br>Hung, Tien-Yao Chang,<br>Feng-Yee Chang,<br>Hung-Sheng Shang |
| hCoV-19/Taiwan/TSGH-60/2022 | EPI_ISL_1<br>1147455 | - | TSGH-CP<br>molecular lab | TSGH-CP<br>molecular lab            | Cherng-Lih Perng,<br>Ming-Jr JIAN, Chih-Kai<br>Chang, Jung-Chung<br>Lin, Kuo-Ming Yeh,<br>Chien-Wen Chen,<br>Sheng-Kang Chiu,                                                                                                                  |

|                             |                 |   |                       |                                                                                                  |                                                                                                                                                                                                                 |
|-----------------------------|-----------------|---|-----------------------|--------------------------------------------------------------------------------------------------|-----------------------------------------------------------------------------------------------------------------------------------------------------------------------------------------------------------------|
|                             |                 |   |                       | Hsing-Yi Chung, Shih-Hung Tsai, Kuo-Sheng Hung, Tien-Yao Chang, Feng-Yee Chang, Hung-Sheng Shang |                                                                                                                                                                                                                 |
| hCoV-19/Taiwan/TSGH-59/2022 | EPI_ISL_1147445 | - | TSGH-CP molecular lab | TSGH-CP molecular lab                                                                            | Cherng-Lih Perng, Ming-Jr JIAN, Chih-Kai Chang, Jung-Chung Lin, Kuo-Ming Yeh, Chien-Wen Chen, Sheng-Kang Chiu, Hsing-Yi Chung, Shih-Hung Tsai, Kuo-Sheng Hung, Tien-Yao Chang, Feng-Yee Chang, Hung-Sheng Shang |
| hCoV-19/Taiwan/TSGH-58/2022 | EPI_ISL_1147434 | - | TSGH-CP molecular lab | TSGH-CP molecular lab                                                                            | Cherng-Lih Perng, Ming-Jr JIAN, Chih-Kai Chang, Jung-Chung Lin, Kuo-Ming Yeh, Chien-Wen Chen, Sheng-Kang Chiu, Hsing-Yi Chung, Shih-Hung Tsai, Kuo-Sheng Hung, Tien-Yao Chang, Feng-Yee Chang, Hung-Sheng Shang |
| hCoV-19/Taiwan/TSGH-57/2022 | EPI_ISL_1147432 | - | TSGH-CP molecular lab | TSGH-CP molecular lab                                                                            | Cherng-Lih Perng, Ming-Jr JIAN, Chih-Kai Chang, Jung-Chung Lin, Kuo-Ming Yeh, Chien-Wen Chen, Sheng-Kang Chiu, Hsing-Yi Chung, Shih-Hung Tsai, Kuo-Sheng Hung, Tien-Yao Chang, Feng-Yee Chang, Hung-Sheng Shang |
| hCoV-19/Taiwan/TSGH-56/2022 | EPI_ISL_1147431 | - | TSGH-CP molecular lab | TSGH-CP molecular lab                                                                            | Cherng-Lih Perng, Ming-Jr JIAN, Chih-Kai Chang, Jung-Chung Lin, Kuo-Ming Yeh, Chien-Wen Chen, Sheng-Kang Chiu, Hsing-Yi Chung, Shih-Hung Tsai, Kuo-Sheng Hung, Tien-Yao Chang, Feng-Yee Chang, Hung-Sheng Shang |
| hCoV-19/Taiwan/TSGH-55/2022 | EPI_ISL_1147430 | - | TSGH-CP molecular lab | TSGH-CP molecular lab                                                                            | Cherng-Lih Perng, Ming-Jr JIAN, Chih-Kai Chang, Jung-Chung                                                                                                                                                      |

|                                     |                      |   |                          |                                                                                                                                                                            |                                                                                                                                                                                                                                                |
|-------------------------------------|----------------------|---|--------------------------|----------------------------------------------------------------------------------------------------------------------------------------------------------------------------|------------------------------------------------------------------------------------------------------------------------------------------------------------------------------------------------------------------------------------------------|
|                                     |                      |   |                          | Lin, Kuo-Ming Yeh,<br>Chien-Wen Chen,<br>Sheng-Kang Chiu,<br>Hsing-Yi Chung, Shih-<br>Hung Tsai, Kuo-Sheng<br>Hung, Tien-Yao Chang,<br>Feng-Yee Chang,<br>Hung-Sheng Shang |                                                                                                                                                                                                                                                |
| hCoV-<br>19/Taiwan/TSGH-<br>54/2022 | EPI_ISL_1<br>1147419 | - | TSGH-CP<br>molecular lab | TSGH-CP<br>molecular lab                                                                                                                                                   | Cherng-Lih Perng,<br>Ming-Jr JIAN, Chih-Kai<br>Chang, Jung-Chung<br>Lin, Kuo-Ming Yeh,<br>Chien-Wen Chen,<br>Sheng-Kang Chiu,<br>Hsing-Yi Chung, Shih-<br>Hung Tsai, Kuo-Sheng<br>Hung, Tien-Yao Chang,<br>Feng-Yee Chang,<br>Hung-Sheng Shang |
| hCoV-<br>19/Taiwan/TSGH-<br>53/2022 | EPI_ISL_1<br>1147418 | - | TSGH-CP<br>molecular lab | TSGH-CP<br>molecular lab                                                                                                                                                   | Cherng-Lih Perng,<br>Ming-Jr JIAN, Chih-Kai<br>Chang, Jung-Chung<br>Lin, Kuo-Ming Yeh,<br>Chien-Wen Chen,<br>Sheng-Kang Chiu,<br>Hsing-Yi Chung, Shih-<br>Hung Tsai, Kuo-Sheng<br>Hung, Tien-Yao Chang,<br>Feng-Yee Chang,<br>Hung-Sheng Shang |
| hCoV-<br>19/Taiwan/TSGH-<br>52/2021 | EPI_ISL_8<br>993636  | - | TSGH-CP<br>molecular lab | TSGH-CP<br>molecular lab                                                                                                                                                   | Cherng-Lih Perng,<br>Ming-Jr JIAN, Chih-Kai<br>Chang, Jung-Chung<br>Lin, Kuo-Ming Yeh,<br>Chien-Wen Chen,<br>Sheng-Kang Chiu,<br>Hsing-Yi Chung, Shih-<br>Hung Tsai, Kuo-Sheng<br>Hung, Tien-Yao Chang,<br>Feng-Yee Chang,<br>Hung-Sheng Shang |
| hCoV-<br>19/Taiwan/TSGH-<br>51/2021 | EPI_ISL_8<br>993543  | - | TSGH-CP<br>molecular lab | TSGH-CP<br>molecular lab                                                                                                                                                   | Cherng-Lih Perng,<br>Ming-Jr JIAN, Chih-Kai<br>Chang, Jung-Chung<br>Lin, Kuo-Ming Yeh,<br>Chien-Wen Chen,<br>Sheng-Kang Chiu,<br>Hsing-Yi Chung, Shih-<br>Hung Tsai, Kuo-Sheng<br>Hung, Tien-Yao Chang,<br>Feng-Yee Chang,<br>Hung-Sheng Shang |

|                             |                     |   |                          |                          |                                                                                                                                                                                                                    |
|-----------------------------|---------------------|---|--------------------------|--------------------------|--------------------------------------------------------------------------------------------------------------------------------------------------------------------------------------------------------------------|
| hCoV-19/Taiwan/TSGH-50/2021 | EPI_ISL_8<br>993542 | - | TSGH-CP<br>molecular lab | TSGH-CP<br>molecular lab | Cherng-Lih Perng,<br>Ming-Jr JIAN, Chih-Kai Chang, Jung-Chung Lin, Kuo-Ming Yeh, Chien-Wen Chen, Sheng-Kang Chiu, Hsing-Yi Chung, Shih-Hung Tsai, Kuo-Sheng Hung, Tien-Yao Chang, Feng-Yee Chang, Hung-Sheng Shang |
| hCoV-19/Taiwan/TSGH-49/2021 | EPI_ISL_8<br>993540 | - | TSGH-CP<br>molecular lab | TSGH-CP<br>molecular lab | Cherng-Lih Perng,<br>Ming-Jr JIAN, Chih-Kai Chang, Jung-Chung Lin, Kuo-Ming Yeh, Chien-Wen Chen, Sheng-Kang Chiu, Hsing-Yi Chung, Shih-Hung Tsai, Kuo-Sheng Hung, Tien-Yao Chang, Feng-Yee Chang, Hung-Sheng Shang |
| hCoV-19/Taiwan/TSGH-48/2021 | EPI_ISL_8<br>993539 | - | TSGH-CP<br>molecular lab | TSGH-CP<br>molecular lab | Cherng-Lih Perng,<br>Ming-Jr JIAN, Chih-Kai Chang, Jung-Chung Lin, Kuo-Ming Yeh, Chien-Wen Chen, Sheng-Kang Chiu, Hsing-Yi Chung, Shih-Hung Tsai, Kuo-Sheng Hung, Tien-Yao Chang, Feng-Yee Chang, Hung-Sheng Shang |
| hCoV-19/Taiwan/TSGH-47/2021 | EPI_ISL_4<br>578347 | - | TSGH-CP<br>molecular lab | TSGH-CP<br>molecular lab | Cherng-Lih Perng,<br>Ming-Jr JIAN, Chih-Kai Chang, Jung-Chung Lin, Kuo-Ming Yeh, Chien-Wen Chen, Sheng-Kang Chiu, Hsing-Yi Chung, Shih-Hung Tsai, Kuo-Sheng Hung, Tien-Yao Chang, Feng-Yee Chang, Hung-Sheng Shang |
| hCoV-19/Taiwan/TSGH-46/2021 | EPI_ISL_4<br>096807 | - | TSGH-CP<br>molecular lab | TSGH-CP<br>molecular lab | Cherng-Lih Perng,<br>Ming-Jr JIAN, Chih-Kai Chang, Jung-Chung Lin, Kuo-Ming Yeh, Chien-Wen Chen, Sheng-Kang Chiu, Hsing-Yi Chung, Shih-Hung Tsai, Kuo-Sheng                                                        |

|                             |                     |   |                          |                                                              |                                                                                                                                                                                                                                                |
|-----------------------------|---------------------|---|--------------------------|--------------------------------------------------------------|------------------------------------------------------------------------------------------------------------------------------------------------------------------------------------------------------------------------------------------------|
|                             |                     |   |                          | Hung, Tien-Yao Chang,<br>Feng-Yee Chang,<br>Hung-Sheng Shang |                                                                                                                                                                                                                                                |
| hCoV-19/Taiwan/TSGH-45/2021 | EPI_ISL_4<br>096805 | - | TSGH-CP<br>molecular lab | TSGH-CP<br>molecular lab                                     | Cherng-Lih Perng,<br>Ming-Jr JIAN, Chih-Kai<br>Chang, Jung-Chung<br>Lin, Kuo-Ming Yeh,<br>Chien-Wen Chen,<br>Sheng-Kang Chiu,<br>Hsing-Yi Chung, Shih-<br>Hung Tsai, Kuo-Sheng<br>Hung, Tien-Yao Chang,<br>Feng-Yee Chang,<br>Hung-Sheng Shang |
| hCoV-19/Taiwan/TSGH-44/2021 | EPI_ISL_4<br>096803 | - | TSGH-CP<br>molecular lab | TSGH-CP<br>molecular lab                                     | Cherng-Lih Perng,<br>Ming-Jr JIAN, Chih-Kai<br>Chang, Jung-Chung<br>Lin, Kuo-Ming Yeh,<br>Chien-Wen Chen,<br>Sheng-Kang Chiu,<br>Hsing-Yi Chung, Shih-<br>Hung Tsai, Kuo-Sheng<br>Hung, Tien-Yao Chang,<br>Feng-Yee Chang,<br>Hung-Sheng Shang |
| hCoV-19/Taiwan/TSGH-43/2021 | EPI_ISL_2<br>693006 | - | TSGH-CP<br>molecular lab | TSGH-CP<br>molecular lab                                     | Cherng-Lih Perng,<br>Ming-Jr JIAN, Chih-Kai<br>Chang, Jung-Chung<br>Lin, Kuo-Ming Yeh,<br>Chien-Wen Chen,<br>Sheng-Kang Chiu,<br>Hsing-Yi Chung, Shih-<br>Hung Tsai, Kuo-Sheng<br>Hung, Tien-Yao Chang,<br>Feng-Yee Chang,<br>Hung-Sheng Shang |
| hCoV-19/Taiwan/TSGH-41/2021 | EPI_ISL_2<br>693000 | - | TSGH-CP<br>molecular lab | TSGH-CP<br>molecular lab                                     | Cherng-Lih Perng,<br>Ming-Jr JIAN, Chih-Kai<br>Chang, Jung-Chung<br>Lin, Kuo-Ming Yeh,<br>Chien-Wen Chen,<br>Sheng-Kang Chiu,<br>Hsing-Yi Chung, Shih-<br>Hung Tsai, Kuo-Sheng<br>Hung, Tien-Yao Chang,<br>Feng-Yee Chang,<br>Hung-Sheng Shang |
| hCoV-19/Taiwan/TSGH-39/2021 | EPI_ISL_2<br>693004 | - | TSGH-CP<br>molecular lab | TSGH-CP<br>molecular lab                                     | Cherng-Lih Perng,<br>Ming-Jr JIAN, Chih-Kai<br>Chang, Jung-Chung<br>Lin, Kuo-Ming Yeh,<br>Chien-Wen Chen,                                                                                                                                      |

|                                     |                    |   |                          |                                                                                                                                   |                                                                                                                                                                                                                                                |
|-------------------------------------|--------------------|---|--------------------------|-----------------------------------------------------------------------------------------------------------------------------------|------------------------------------------------------------------------------------------------------------------------------------------------------------------------------------------------------------------------------------------------|
|                                     |                    |   |                          | Sheng-Kang Chiu,<br>Hsing-Yi Chung, Shih-<br>Hung Tsai, Kuo-Sheng<br>Hung, Tien-Yao Chang,<br>Feng-Yee Chang,<br>Hung-Sheng Shang |                                                                                                                                                                                                                                                |
| hCoV-<br>19/Taiwan/TSGH-<br>38/2020 | EPI_ISL_4<br>58029 | - | TSGH-CP<br>molecular lab | TSGH-CP<br>molecular lab                                                                                                          | Cherng-Lih Perng,<br>Ming-Jr JIAN, Chih-Kai<br>Chang, Jung-Chung<br>Lin, Kuo-Ming Yeh,<br>Chien-Wen Chen,<br>Sheng-Kang Chiu,<br>Hsing-Yi Chung, Shih-<br>Hung Tsai, Kuo-Sheng<br>Hung, Tien-Yao Chang,<br>Feng-Yee Chang,<br>Hung-Sheng Shang |
| hCoV-<br>19/Taiwan/TSGH-<br>37/2020 | EPI_ISL_4<br>57733 | - | TSGH-CP<br>molecular lab | TSGH-CP<br>molecular lab                                                                                                          | Cherng-Lih Perng,<br>Ming-Jr JIAN, Chih-Kai<br>Chang, Jung-Chung<br>Lin, Kuo-Ming Yeh,<br>Chien-Wen Chen,<br>Sheng-Kang Chiu,<br>Hsing-Yi Chung, Shih-<br>Hung Tsai, Kuo-Sheng<br>Hung, Tien-Yao Chang,<br>Feng-Yee Chang,<br>Hung-Sheng Shang |
| hCoV-<br>19/Taiwan/TSGH-<br>36/2020 | EPI_ISL_4<br>57730 | - | TSGH-CP<br>molecular lab | TSGH-CP<br>molecular lab                                                                                                          | Cherng-Lih Perng,<br>Ming-Jr JIAN, Chih-Kai<br>Chang, Jung-Chung<br>Lin, Kuo-Ming Yeh,<br>Chien-Wen Chen,<br>Sheng-Kang Chiu,<br>Hsing-Yi Chung, Shih-<br>Hung Tsai, Kuo-Sheng<br>Hung, Tien-Yao Chang,<br>Feng-Yee Chang,<br>Hung-Sheng Shang |
| hCoV-<br>19/Taiwan/TSGH-<br>34/2020 | EPI_ISL_4<br>47593 | - | TSGH-CP<br>molecular lab | TSGH-CP<br>molecular lab                                                                                                          | Cherng-Lih Perng,<br>Ming-Jr JIAN, Chih-Kai<br>Chang, Jung-Chung<br>Lin, Kuo-Ming Yeh,<br>Chien-Wen Chen,<br>Sheng-Kang Chiu,<br>Hsing-Yi Chung, Shih-<br>Hung Tsai, Kuo-Sheng<br>Hung, Tien-Yao Chang,<br>Feng-Yee Chang,<br>Hung-Sheng Shang |
| hCoV-<br>19/Taiwan/TSGH-            | EPI_ISL_4<br>47592 | - | TSGH-CP<br>molecular lab | TSGH-CP<br>molecular lab                                                                                                          | Cherng-Lih Perng,<br>Ming-Jr JIAN, Chih-Kai                                                                                                                                                                                                    |



|                                     |                    |   |                          |                                                                                                                                                                                                 |                                                                                                                                                                                                                                                |
|-------------------------------------|--------------------|---|--------------------------|-------------------------------------------------------------------------------------------------------------------------------------------------------------------------------------------------|------------------------------------------------------------------------------------------------------------------------------------------------------------------------------------------------------------------------------------------------|
| 33/2020                             |                    |   |                          | Chang, Jung-Chung<br>Lin, Kuo-Ming Yeh,<br>Chien-Wen Chen,<br>Sheng-Kang Chiu,<br>Hsing-Yi Chung, Shih-<br>Hung Tsai, Kuo-Sheng<br>Hung, Tien-Yao Chang,<br>Feng-Yee Chang,<br>Hung-Sheng Shang |                                                                                                                                                                                                                                                |
| hCoV-<br>19/Taiwan/TSGH-<br>32/2020 | EPI_ISL_4<br>47591 | - | TSGH-CP<br>molecular lab | TSGH-CP<br>molecular lab                                                                                                                                                                        | Cherng-Lih Perng,<br>Ming-Jr JIAN, Chih-Kai<br>Chang, Jung-Chung<br>Lin, Kuo-Ming Yeh,<br>Chien-Wen Chen,<br>Sheng-Kang Chiu,<br>Hsing-Yi Chung, Shih-<br>Hung Tsai, Kuo-Sheng<br>Hung, Tien-Yao Chang,<br>Feng-Yee Chang,<br>Hung-Sheng Shang |
| hCoV-<br>19/Taiwan/TSGH-<br>30/2020 | EPI_ISL_4<br>47256 | - | TSGH-CP<br>molecular lab | TSGH-CP<br>molecular lab                                                                                                                                                                        | Cherng-Lih Perng,<br>Ming-Jr JIAN, Chih-Kai<br>Chang, Jung-Chung<br>Lin, Kuo-Ming Yeh,<br>Chien-Wen Chen,<br>Sheng-Kang Chiu,<br>Hsing-Yi Chung, Shih-<br>Hung Tsai, Kuo-Sheng<br>Hung, Tien-Yao Chang,<br>Feng-Yee Chang,<br>Hung-Sheng Shang |
| hCoV-<br>19/Taiwan/TSGH-<br>29/2020 | EPI_ISL_4<br>47255 | - | TSGH-CP<br>molecular lab | TSGH-CP<br>molecular lab                                                                                                                                                                        | Cherng-Lih Perng,<br>Ming-Jr JIAN, Chih-Kai<br>Chang, Jung-Chung<br>Lin, Kuo-Ming Yeh,<br>Chien-Wen Chen,<br>Sheng-Kang Chiu,<br>Hsing-Yi Chung, Shih-<br>Hung Tsai, Kuo-Sheng<br>Hung, Tien-Yao Chang,<br>Feng-Yee Chang,<br>Hung-Sheng Shang |
| hCoV-<br>19/Taiwan/TSGH-<br>28/2020 | EPI_ISL_4<br>47254 | - | TSGH-CP<br>molecular lab | TSGH-CP<br>molecular lab                                                                                                                                                                        | Cherng-Lih Perng,<br>Ming-Jr JIAN, Chih-Kai<br>Chang, Jung-Chung<br>Lin, Kuo-Ming Yeh,<br>Chien-Wen Chen,<br>Sheng-Kang Chiu,<br>Hsing-Yi Chung, Shih-<br>Hung Tsai, Kuo-Sheng<br>Hung, Tien-Yao Chang,<br>Feng-Yee Chang,                     |

|                             |                    |   |                                                                                                  | Hung-Sheng Shang                                                                                 |                                                                                                                                                                                                                                                |
|-----------------------------|--------------------|---|--------------------------------------------------------------------------------------------------|--------------------------------------------------------------------------------------------------|------------------------------------------------------------------------------------------------------------------------------------------------------------------------------------------------------------------------------------------------|
| hCoV-19/Taiwan/TSGH-26/2020 | EPI_ISL_4<br>47252 | - | TSGH-CP<br>molecular lab                                                                         | TSGH-CP<br>molecular lab                                                                         | Cherng-Lih Perng,<br>Ming-Jr JIAN, Chih-Kai<br>Chang, Jung-Chung<br>Lin, Kuo-Ming Yeh,<br>Chien-Wen Chen,<br>Sheng-Kang Chiu,<br>Hsing-Yi Chung, Shih-<br>Hung Tsai, Kuo-Sheng<br>Hung, Tien-Yao Chang,<br>Feng-Yee Chang,<br>Hung-Sheng Shang |
| hCoV-19/Taiwan/TSGH-25/2020 | EPI_ISL_4<br>37336 | - | TSGH-CP<br>molecular lab,<br>Division of<br>Clinical<br>Pathology,<br>Department of<br>Pathology | TSGH-CP<br>molecular lab,<br>Division of<br>Clinical<br>Pathology,<br>Department of<br>Pathology | Cherng-Lih Perng,<br>Ming-Jr JIAN, Chih-Kai<br>Chang, Jung-Chung<br>Lin, Kuo-Ming Yeh,<br>Chien-Wen Chen,<br>Sheng-Kang Chiu,<br>Hsing-Yi Chung, Shih-<br>Hung Tsai, Kuo-Sheng<br>Hung, Tien-Yao Chang,<br>Feng-Yee Chang,<br>Hung-Sheng Shang |
| hCoV-19/Taiwan/TSGH-24/2020 | EPI_ISL_4<br>36099 | - | TSGH-CP<br>molecular lab                                                                         | TSGH-CP<br>molecular lab                                                                         | Cherng-Lih Perng,<br>Ming-Jr JIAN, Chih-Kai<br>Chang, Jung-Chung<br>Lin, Kuo-Ming Yeh,<br>Chien-Wen Chen,<br>Sheng-Kang Chiu,<br>Hsing-Yi Chung, Shih-<br>Hung Tsai, Kuo-Sheng<br>Hung, Tien-Yao Chang,<br>Feng-Yee Chang,<br>Hung-Sheng Shang |
| hCoV-19/Taiwan/TSGH-23/2020 | EPI_ISL_4<br>36108 | - | TSGH-CP<br>molecular lab                                                                         | TSGH-CP<br>molecular lab                                                                         | Cherng-Lih Perng,<br>Ming-Jr JIAN, Chih-Kai<br>Chang, Jung-Chung<br>Lin, Kuo-Ming Yeh,<br>Chien-Wen Chen,<br>Sheng-Kang Chiu,<br>Hsing-Yi Chung, Shih-<br>Hung Tsai, Kuo-Sheng<br>Hung, Tien-Yao Chang,<br>Feng-Yee Chang,<br>Hung-Sheng Shang |
| hCoV-19/Taiwan/TSGH-22/2020 | EPI_ISL_4<br>36107 | - | TSGH-CP<br>molecular lab                                                                         | TSGH-CP<br>molecular lab                                                                         | Cherng-Lih Perng,<br>Ming-Jr JIAN, Chih-Kai<br>Chang, Jung-Chung<br>Lin, Kuo-Ming Yeh,<br>Chien-Wen Chen,<br>Sheng-Kang Chiu,<br>Hsing-Yi Chung, Shih-                                                                                         |

|                             |                    |   |                          |                                                                             |                                                                                                                                                                                                                 |
|-----------------------------|--------------------|---|--------------------------|-----------------------------------------------------------------------------|-----------------------------------------------------------------------------------------------------------------------------------------------------------------------------------------------------------------|
|                             |                    |   |                          | Hung Tsai, Kuo-Sheng Hung, Tien-Yao Chang, Feng-Yee Chang, Hung-Sheng Shang |                                                                                                                                                                                                                 |
| hCoV-19/Taiwan/TSGH-21/2020 | EPI_ISL_4<br>36106 | - | TSGH-CP<br>molecular lab | TSGH-CP<br>molecular lab                                                    | Cherng-Lih Perng, Ming-Jr JIAN, Chih-Kai Chang, Jung-Chung Lin, Kuo-Ming Yeh, Chien-Wen Chen, Sheng-Kang Chiu, Hsing-Yi Chung, Shih-Hung Tsai, Kuo-Sheng Hung, Tien-Yao Chang, Feng-Yee Chang, Hung-Sheng Shang |
| hCoV-19/Taiwan/TSGH-20/2020 | EPI_ISL_4<br>36105 | - | TSGH-CP<br>molecular lab | TSGH-CP<br>molecular lab                                                    | Cherng-Lih Perng, Ming-Jr Jian, Chih-Kai Chang, Jung-Chung Lin, Kuo-Ming Yeh, Chien-Wen Chen, Sheng-Kang Chiu, Hsing-Yi Chung, Shih-Hung Tsai, Kuo-Sheng Hung, Tien-Yao Chang, Feng-Yee Chang, Hung-Sheng Shang |
| hCoV-19/Taiwan/TSGH-19/2020 | EPI_ISL_4<br>36104 | - | TSGH-CP<br>molecular lab | TSGH-CP<br>molecular lab                                                    | Cherng-Lih Perng, Ming-Jr JIAN, Chih-Kai Chang, Jung-Chung Lin, Kuo-Ming Yeh, Chien-Wen Chen, Sheng-Kang Chiu, Hsing-Yi Chung, Shih-Hung Tsai, Kuo-Sheng Hung, Tien-Yao Chang, Feng-Yee Chang, Hung-Sheng Shang |
| hCoV-19/Taiwan/TSGH-17/2020 | EPI_ISL_4<br>36102 | - | TSGH-CP<br>molecular lab | TSGH-CP<br>molecular lab                                                    | Cherng-Lih Perng, Ming-Jr JIAN, Chih-Kai Chang, Jung-Chung Lin, Kuo-Ming Yeh, Chien-Wen Chen, Sheng-Kang Chiu, Hsing-Yi Chung, Shih-Hung Tsai, Kuo-Sheng Hung, Tien-Yao Chang, Feng-Yee Chang, Hung-Sheng Shang |
| hCoV-19/Taiwan/TSGH-16/2020 | EPI_ISL_4<br>36101 | - | TSGH-CP<br>molecular lab | TSGH-CP<br>molecular lab                                                    | Cherng-Lih Perng, Ming-Jr JIAN, Chih-Kai Chang, Jung-Chung Lin, Kuo-Ming Yeh,                                                                                                                                   |

|                                     |                    |   |                          |                                                                                                                                                      |                                                                                                                                                                                                                                                |
|-------------------------------------|--------------------|---|--------------------------|------------------------------------------------------------------------------------------------------------------------------------------------------|------------------------------------------------------------------------------------------------------------------------------------------------------------------------------------------------------------------------------------------------|
|                                     |                    |   |                          | Chien-Wen Chen,<br>Sheng-Kang Chiu,<br>Hsing-Yi Chung, Shih-<br>Hung Tsai, Kuo-Sheng<br>Hung, Tien-Yao Chang,<br>Feng-Yee Chang,<br>Hung-Sheng Shang |                                                                                                                                                                                                                                                |
| hCoV-<br>19/Taiwan/TSGH-<br>15/2020 | EPI_ISL_4<br>36100 | - | TSGH-CP<br>molecular lab | TSGH-CP<br>molecular lab                                                                                                                             | Cherng-Lih Perng,<br>Ming-Jr Jian, Chih-Kai<br>Chang, Jung-Chung<br>Lin, Kuo-Ming Yeh,<br>Chien-Wen Chen,<br>Sheng-Kang Chiu,<br>Hsing-Yi Chung, Shih-<br>Hung Tsai, Kuo-Sheng<br>Hung, Tien-Yao Chang,<br>Feng-Yee Chang,<br>Hung-Sheng Shang |
| hCoV-<br>19/Taiwan/TSGH-<br>14/2020 | EPI_ISL_4<br>28231 | - | TSGH-CP<br>molecular lab | TSGH-CP<br>molecular lab                                                                                                                             | Cherng-Lih Perng,<br>Ming-Jr JIAN, Chih-Kai<br>Chang, Jung-Chung<br>Lin, Kuo-Ming Yeh,<br>Chien-Wen Chen,<br>Sheng-Kang Chiu,<br>Hsing-Yi Chung, Shih-<br>Hung Tsai, Kuo-Sheng<br>Hung, Tien-Yao Chang,<br>Feng-Yee Chang,<br>Hung-Sheng Shang |
| hCoV-<br>19/Taiwan/TSGH-<br>13/2020 | EPI_ISL_4<br>28230 | - | TSGH-CP<br>molecular lab | TSGH-CP<br>molecular lab                                                                                                                             | Cherng-Lih Perng,<br>Ming-Jr Jian, Chih-Kai<br>Chang, Jung-Chung<br>Lin, Kuo-Ming Yeh,<br>Chien-Wen Chen,<br>Sheng-Kang Chiu,<br>Hsing-Yi Chung, Shih-<br>Hung Tsai, Kuo-Sheng<br>Hung, Tien-Yao Chang,<br>Feng-Yee Chang,<br>Hung-Sheng Shang |
| hCoV-<br>19/Taiwan/TSGH-<br>12/2020 | EPI_ISL_4<br>28229 | - | TSGH-CP<br>molecular lab | TSGH-CP<br>molecular lab                                                                                                                             | Cherng-Lih Perng,<br>Ming-Jr Jian, Chih-Kai<br>Chang, Jung-Chung<br>Lin, Kuo-Ming Yeh,<br>Chien-Wen Chen,<br>Sheng-Kang Chiu,<br>Hsing-Yi Chung, Shih-<br>Hung Tsai, Kuo-Sheng<br>Hung, Tien-Yao Chang,<br>Feng-Yee Chang,<br>Hung-Sheng Shang |
| hCoV-                               | EPI_ISL_4          | - | TSGH-CP                  | TSGH-CP                                                                                                                                              | Cherng-Lih Perng,                                                                                                                                                                                                                              |

|                             |                   |  |                       |                       |                                                                                                                                                                                                                 |
|-----------------------------|-------------------|--|-----------------------|-----------------------|-----------------------------------------------------------------------------------------------------------------------------------------------------------------------------------------------------------------|
| 19/Taiwan/TSGH-11/2020      | 27398             |  | molecular lab         | molecular lab         | Ming-Jr Jian, Chih-Kai Chang, Jung-Chung Lin, Kuo-Ming Yeh, Chien-Wen Chen, Sheng-Kang Chiu, Hsing-Yi Chung, Shih-Hung Tsai, Kuo-Sheng Hung, Tien-Yao Chang, Feng-Yee Chang, Hung-Sheng Shang                   |
| hCoV-19/Taiwan/TSGH-08/2020 | EPI_ISL_4 - 27395 |  | TSGH-CP molecular lab | TSGH-CP molecular lab | Cherng-Lih Perng, Ming-Jr Jian, Chih-Kai Chang, Jung-Chung Lin, Kuo-Ming Yeh, Chien-Wen Chen, Sheng-Kang Chiu, Hsing-Yi Chung, Shih-Hung Tsai, Kuo-Sheng Hung, Tien-Yao Chang, Feng-Yee Chang, Hung-Sheng Shang |
| hCoV-19/Taiwan/TSGH-07/2020 | EPI_ISL_4 - 27394 |  | TSGH-CP molecular lab | TSGH-CP molecular lab | Cherng-Lih Perng, Ming-Jr Jian, Chih-Kai Chang, Jung-Chung Lin, Kuo-Ming Yeh, Chien-Wen Chen, Sheng-Kang Chiu, Hsing-Yi Chung, Shih-Hung Tsai, Kuo-Sheng Hung, Tien-Yao Chang, Feng-Yee Chang, Hung-Sheng Shang |
| hCoV-19/Taiwan/TSGH-06/2020 | EPI_ISL_4 - 27393 |  | TSGH-CP molecular lab | TSGH-CP molecular lab | Cherng-Lih Perng, Ming-Jr Jian, Chih-Kai Chang, Jung-Chung Lin, Kuo-Ming Yeh, Chien-Wen Chen, Sheng-Kang Chiu, Hsing-Yi Chung, Shih-Hung Tsai, Kuo-Sheng Hung, Tien-Yao Chang, Feng-Yee Chang, Hung-Sheng Shang |
| hCoV-19/Taiwan/TSGH-05/2020 | EPI_ISL_4 - 27392 |  | TSGH-CP molecular lab | TSGH-CP molecular lab | Cherng-Lih Perng, Ming-Jr Jian, Chih-Kai Chang, Jung-Chung Lin, Kuo-Ming Yeh, Chien-Wen Chen, Sheng-Kang Chiu, Hsing-Yi Chung, Shih-Hung Tsai, Kuo-Sheng Hung, Tien-Yao Chang,                                  |

|                             |                      |   |                                                                                       |                                                                                                                       |                                                                                                                                                                                                                                                |
|-----------------------------|----------------------|---|---------------------------------------------------------------------------------------|-----------------------------------------------------------------------------------------------------------------------|------------------------------------------------------------------------------------------------------------------------------------------------------------------------------------------------------------------------------------------------|
|                             |                      |   |                                                                                       |                                                                                                                       | Feng-Yee Chang,<br>Hung-Sheng Shang                                                                                                                                                                                                            |
| hCoV-19/Taiwan/TSGH-04/2020 | EPI_ISL_4<br>26632   | - | TSGH-CP<br>molecular lab                                                              | TSGH-CP<br>molecular lab                                                                                              | Cherng-Lih Perng,<br>Ming-Jr Jian, Chih-Kai<br>Chang, Jung-Chung<br>Lin, Kuo-Ming Yeh,<br>Chien-Wen Chen,<br>Sheng-Kang Chiu,<br>Hsing-Yi Chung, Shih-<br>Hung Tsai, Kuo-Sheng<br>Hung, Tien-Yao Chang,<br>Feng-Yee Chang,<br>Hung-Sheng Shang |
| hCoV-19/Taiwan/TSGH-02/2020 | EPI_ISL_4<br>26630   | - | TSGH-CP<br>molecular lab                                                              | TSGH-CP<br>molecular lab                                                                                              | Cherng-Lih Perng,<br>Ming-Jr Jian, Chih-Kai<br>Chang, Jung-Chung<br>Lin, Kuo-Ming Yeh,<br>Chien-Wen Chen,<br>Sheng-Kang Chiu,<br>Hsing-Yi Chung, Shih-<br>Hung Tsai, Kuo-Sheng<br>Hung, Feng-Yee<br>Chang, Hung-Sheng<br>Shang                 |
| hCoV-19/Taiwan/TSGH-01/2020 | EPI_ISL_4<br>26629   | - | TSGH-CP<br>molecular lab                                                              | TSGH-CP<br>molecular lab                                                                                              | Cherng-Lih Perng,<br>Ming-Jr Jian, Chih-Kai<br>Chang, Jung-Chung<br>Lin, Kuo-Ming Yeh,<br>Chien-Wen Chen,<br>Sheng-Kang Chiu,<br>Hsing-Yi Chung, Shih-<br>Hung Tsai, Kuo-Sheng<br>Hung, Feng-Yee<br>Chang, Hung-Sheng<br>Shang                 |
| hCoV-19/Taiwan/NTU99/2021   | EPI_ISL_1<br>3618354 | - | Department of<br>Laboratory<br>Medicine,<br>National Taiwan<br>University<br>Hospital | Department of<br>Clinical<br>Laboratory<br>Sciences and<br>Medical<br>Biotechnology,<br>National Taiwan<br>University | Shiou-Hwei Yeh,<br>Hurng-Yi Wang, Sui-<br>Yuan Chang                                                                                                                                                                                           |
| hCoV-19/Taiwan/NTU98/2021   | EPI_ISL_1<br>1333516 | - | Department of<br>Laboratory<br>Medicine,<br>National Taiwan<br>University<br>Hospital | Department of<br>Clinical<br>Laboratory<br>Sciences and<br>Medical<br>Biotechnology,<br>National Taiwan<br>University | Sui-Yuan Chang                                                                                                                                                                                                                                 |
| hCoV-                       | EPI_ISL_1            | - | Department of                                                                         | Department of                                                                                                         | Shiou-Hwei Yeh,                                                                                                                                                                                                                                |

|                           |                   |   |                                                                        |                                                                                                   |                                                                                                                      |
|---------------------------|-------------------|---|------------------------------------------------------------------------|---------------------------------------------------------------------------------------------------|----------------------------------------------------------------------------------------------------------------------|
| 19/Taiwan/NTU97/2021      | 3618353           |   | Laboratory Medicine, National Taiwan University Hospital               | Clinical Laboratory Sciences and Medical Biotechnology, National Taiwan University                | Hurng-Yi Wang, Sui-Yuan Chang                                                                                        |
| hCoV-19/Taiwan/NTU95/2021 | EPI_ISL_1 1333432 | - | Department of Laboratory Medicine, National Taiwan University Hospital | Department of Clinical Laboratory Sciences and Medical Biotechnology, National Taiwan University  | Sui-Yuan Chang                                                                                                       |
| hCoV-19/Taiwan/NTU94/2021 | EPI_ISL_1 1333413 | - | Department of Laboratory Medicine, National Taiwan University Hospital | Department of Clinical Laboratory Sciences and Medical Biotechnology, National Taiwan University  | Sui-Yuan Chang                                                                                                       |
| hCoV-19/Taiwan/NTU93/2021 | EPI_ISL_1 3618352 | - | Department of Laboratory Medicine, National Taiwan University Hospital | Department of Clinical Laboratory Sciences and Medical Biotechnology, National Taiwan University  | Shiou-Hwei Yeh, Hurng-Yi Wang, Sui-Yuan Chang                                                                        |
| hCoV-19/Taiwan/NTU92/2021 | EPI_ISL_3 979387  | - | Department of Laboratory Medicine, National Taiwan University Hospital | Microbial Genomics Core Lab, National Taiwan University Centers of Genomic and Precision Medicine | Shiou-Hwei Yeh, Hurng-Yi Wang, You-Yu Lin, Tzi-Yuan Wang, Ya-Yun Lai, Pei-Jer Chen, Shan-Chwen Chang, Sui-Yuan Chang |
| hCoV-19/Taiwan/NTU91/2021 | EPI_ISL_1 1333514 | - | Department of Laboratory Medicine, National Taiwan University Hospital | Department of Clinical Laboratory Sciences and Medical Biotechnology, National Taiwan University  | Sui-Yuan Chang                                                                                                       |
| hCoV-19/Taiwan/NTU90/2021 | EPI_ISL_1 3618351 | - | Department of Laboratory Medicine, National Taiwan University Hospital | Department of Clinical Laboratory Sciences and                                                    | Shiou-Hwei Yeh, Hurng-Yi Wang, Sui-Yuan Chang                                                                        |

|                                   |                      |   |                                                                                       |                                                                                                                       |                                                      |
|-----------------------------------|----------------------|---|---------------------------------------------------------------------------------------|-----------------------------------------------------------------------------------------------------------------------|------------------------------------------------------|
|                                   |                      |   | University<br>Hospital                                                                | Medical<br>Biotechnology,<br>National Taiwan<br>University                                                            |                                                      |
| hCoV-<br>19/Taiwan/NTU88/202<br>1 | EPI_ISL_1<br>1333411 | - | Department of<br>Laboratory<br>Medicine,<br>National Taiwan<br>University<br>Hospital | Department of<br>Clinical<br>Laboratory<br>Sciences and<br>Medical<br>Biotechnology,<br>National Taiwan<br>University | Sui-Yuan Chang                                       |
| hCoV-<br>19/Taiwan/NTU87/202<br>1 | EPI_ISL_1<br>3618350 | - | Department of<br>Laboratory<br>Medicine,<br>National Taiwan<br>University<br>Hospital | Department of<br>Clinical<br>Laboratory<br>Sciences and<br>Medical<br>Biotechnology,<br>National Taiwan<br>University | Shiou-Hwei Yeh,<br>Hurng-Yi Wang, Sui-<br>Yuan Chang |
| hCoV-<br>19/Taiwan/NTU86/202<br>1 | EPI_ISL_1<br>3618349 | - | Department of<br>Laboratory<br>Medicine,<br>National Taiwan<br>University<br>Hospital | Department of<br>Clinical<br>Laboratory<br>Sciences and<br>Medical<br>Biotechnology,<br>National Taiwan<br>University | Shiou-Hwei Yeh,<br>Hurng-Yi Wang, Sui-<br>Yuan Chang |
| hCoV-<br>19/Taiwan/NTU85/202<br>1 | EPI_ISL_1<br>3578741 | - | Department of<br>Laboratory<br>Medicine,<br>National Taiwan<br>University<br>Hospital | Department of<br>Clinical<br>Laboratory<br>Sciences and<br>Medical<br>Biotechnology,<br>National Taiwan<br>University | Shiou-Hwei Yeh,<br>Hurng-Yi Wang, Sui-<br>Yuan Chang |
| hCoV-<br>19/Taiwan/NTU84/202<br>1 | EPI_ISL_1<br>3578740 | - | Department of<br>Laboratory<br>Medicine,<br>National Taiwan<br>University<br>Hospital | Department of<br>Clinical<br>Laboratory<br>Sciences and<br>Medical<br>Biotechnology,<br>National Taiwan<br>University | Shiou-Hwei Yeh,<br>Hurng-Yi Wang, Sui-<br>Yuan Chang |
| hCoV-<br>19/Taiwan/NTU83/202<br>1 | EPI_ISL_1<br>3618348 | - | Department of<br>Laboratory<br>Medicine,<br>National Taiwan<br>University<br>Hospital | Department of<br>Clinical<br>Laboratory<br>Sciences and<br>Medical<br>Biotechnology,<br>National Taiwan<br>University | Shiou-Hwei Yeh,<br>Hurng-Yi Wang, Sui-<br>Yuan Chang |



|                           |                      |   |                                                                        |                                                                                                  |                                               |
|---------------------------|----------------------|---|------------------------------------------------------------------------|--------------------------------------------------------------------------------------------------|-----------------------------------------------|
| hCoV-19/Taiwan/NTU82/2021 | EPI_ISL_1<br>3578739 | - | Department of Laboratory Medicine, National Taiwan University Hospital | Department of Clinical Laboratory Sciences and Medical Biotechnology, National Taiwan University | Shiou-Hwei Yeh, Hurng-Yi Wang, Sui-Yuan Chang |
| hCoV-19/Taiwan/NTU81/2021 | EPI_ISL_1<br>3578738 | - | Department of Laboratory Medicine, National Taiwan University Hospital | Department of Clinical Laboratory Sciences and Medical Biotechnology, National Taiwan University | Shiou-Hwei Yeh, Hurng-Yi Wang, Sui-Yuan Chang |
| hCoV-19/Taiwan/NTU80/2021 | EPI_ISL_1<br>3578737 | - | Department of Laboratory Medicine, National Taiwan University Hospital | Department of Clinical Laboratory Sciences and Medical Biotechnology, National Taiwan University | Shiou-Hwei Yeh, Hurng-Yi Wang, Sui-Yuan Chang |
| hCoV-19/Taiwan/NTU79/2021 | EPI_ISL_1<br>3578736 | - | Department of Laboratory Medicine, National Taiwan University Hospital | Department of Clinical Laboratory Sciences and Medical Biotechnology, National Taiwan University | Shiou-Hwei Yeh, Hurng-Yi Wang, Sui-Yuan Chang |
| hCoV-19/Taiwan/NTU78/2021 | EPI_ISL_1<br>3578735 | - | Department of Laboratory Medicine, National Taiwan University Hospital | Department of Clinical Laboratory Sciences and Medical Biotechnology, National Taiwan University | Shiou-Hwei Yeh, Hurng-Yi Wang, Sui-Yuan Chang |
| hCoV-19/Taiwan/NTU77/2021 | EPI_ISL_1<br>3618347 | - | Department of Laboratory Medicine, National Taiwan University Hospital | Department of Clinical Laboratory Sciences and Medical Biotechnology, National Taiwan University | Shiou-Hwei Yeh, Hurng-Yi Wang, Sui-Yuan Chang |
| hCoV-19/Taiwan/NTU76/2021 | EPI_ISL_1<br>3618346 | - | Department of Laboratory Medicine, National Taiwan University Hospital | Department of Clinical Laboratory Sciences and                                                   | Shiou-Hwei Yeh, Hurng-Yi Wang, Sui-Yuan Chang |

|                                   |                      |   |                                                                                       |                                                                                                                       |                                                      |
|-----------------------------------|----------------------|---|---------------------------------------------------------------------------------------|-----------------------------------------------------------------------------------------------------------------------|------------------------------------------------------|
|                                   |                      |   | University<br>Hospital                                                                | Medical<br>Biotechnology,<br>National Taiwan<br>University                                                            |                                                      |
| hCoV-<br>19/Taiwan/NTU75/202<br>1 | EPI_ISL_1<br>3578734 | - | Department of<br>Laboratory<br>Medicine,<br>National Taiwan<br>University<br>Hospital | Department of<br>Clinical<br>Laboratory<br>Sciences and<br>Medical<br>Biotechnology,<br>National Taiwan<br>University | Shiou-Hwei Yeh,<br>Hurng-Yi Wang, Sui-<br>Yuan Chang |
| hCoV-<br>19/Taiwan/NTU74/202<br>1 | EPI_ISL_1<br>3618345 | - | Department of<br>Laboratory<br>Medicine,<br>National Taiwan<br>University<br>Hospital | Department of<br>Clinical<br>Laboratory<br>Sciences and<br>Medical<br>Biotechnology,<br>National Taiwan<br>University | Shiou-Hwei Yeh,<br>Hurng-Yi Wang, Sui-<br>Yuan Chang |
| hCoV-<br>19/Taiwan/NTU73/202<br>1 | EPI_ISL_1<br>3578733 | - | Department of<br>Laboratory<br>Medicine,<br>National Taiwan<br>University<br>Hospital | Department of<br>Clinical<br>Laboratory<br>Sciences and<br>Medical<br>Biotechnology,<br>National Taiwan<br>University | Shiou-Hwei Yeh,<br>Hurng-Yi Wang, Sui-<br>Yuan Chang |
| hCoV-<br>19/Taiwan/NTU72/202<br>1 | EPI_ISL_1<br>3578732 | - | Department of<br>Laboratory<br>Medicine,<br>National Taiwan<br>University<br>Hospital | Department of<br>Clinical<br>Laboratory<br>Sciences and<br>Medical<br>Biotechnology,<br>National Taiwan<br>University | Shiou-Hwei Yeh,<br>Hurng-Yi Wang, Sui-<br>Yuan Chang |
| hCoV-<br>19/Taiwan/NTU71/202<br>1 | EPI_ISL_1<br>3578731 | - | Department of<br>Laboratory<br>Medicine,<br>National Taiwan<br>University<br>Hospital | Department of<br>Clinical<br>Laboratory<br>Sciences and<br>Medical<br>Biotechnology,<br>National Taiwan<br>University | Shiou-Hwei Yeh,<br>Hurng-Yi Wang, Sui-<br>Yuan Chang |
| hCoV-<br>19/Taiwan/NTU70/202<br>1 | EPI_ISL_1<br>3578730 | - | Department of<br>Laboratory<br>Medicine,<br>National Taiwan<br>University<br>Hospital | Department of<br>Clinical<br>Laboratory<br>Sciences and<br>Medical<br>Biotechnology,<br>National Taiwan<br>University | Shiou-Hwei Yeh,<br>Hurng-Yi Wang, Sui-<br>Yuan Chang |

|                           |                      |   |                                                                        |                                                                                                   |                                                                                                       |
|---------------------------|----------------------|---|------------------------------------------------------------------------|---------------------------------------------------------------------------------------------------|-------------------------------------------------------------------------------------------------------|
| hCoV-19/Taiwan/NTU69/2021 | EPI_ISL_1<br>3578729 | - | Department of Laboratory Medicine, National Taiwan University Hospital | Department of Clinical Laboratory Sciences and Medical Biotechnology, National Taiwan University  | Shiou-Hwei Yeh, Hurng-Yi Wang, Sui-Yuan Chang                                                         |
| hCoV-19/Taiwan/NTU68/2021 | EPI_ISL_1<br>3578728 | - | Department of Laboratory Medicine, National Taiwan University Hospital | Department of Clinical Laboratory Sciences and Medical Biotechnology, National Taiwan University  | Shiou-Hwei Yeh, Hurng-Yi Wang, Sui-Yuan Chang                                                         |
| hCoV-19/Taiwan/NTU67/2021 | EPI_ISL_1<br>3618360 | - | Department of Laboratory Medicine, National Taiwan University Hospital | Department of Clinical Laboratory Sciences and Medical Biotechnology, National Taiwan University  | Shiou-Hwei Yeh, Hurng-Yi Wang, Sui-Yuan Chang                                                         |
| hCoV-19/Taiwan/NTU66/2021 | EPI_ISL_1<br>3618344 | - | Department of Laboratory Medicine, National Taiwan University Hospital | Department of Clinical Laboratory Sciences and Medical Biotechnology, National Taiwan University  | Shiou-Hwei Yeh, Hurng-Yi Wang, Sui-Yuan Chang                                                         |
| hCoV-19/Taiwan/NTU63/2021 | EPI_ISL_1<br>3566006 | - | Department of Laboratory Medicine, National Taiwan University Hospital | Department of Clinical Laboratory Sciences and Medical Biotechnology, National Taiwan University  | Shiou-Hwei Yeh, Hurng-Yi Wang, Sui-Yuan Chang                                                         |
| hCoV-19/Taiwan/NTU62/2021 | EPI_ISL_1<br>667475  | - | Department of Laboratory Medicine, National Taiwan University Hospital | Microbial Genomics Core Lab, National Taiwan University Centers of Genomic and Precision Medicine | Shiou-Hwei Yeh, You-Yu Lin, Ya-Yun Lai, Chiao-Ling Li, Shan-Chwen Chang, Pei-Jer Chen, Sui-Yuan Chang |
| hCoV-19/Taiwan/NTU61/2021 | EPI_ISL_1<br>667474  | - | Department of Laboratory Medicine,                                     | Microbial Genomics Core Lab, National                                                             | Shiou-Hwei Yeh, You-Yu Lin, Ya-Yun Lai, Chiao-Ling Li, Shan-                                          |

|                           |                    |  |                                                                        |                                                                                                   |                                                                                                       |
|---------------------------|--------------------|--|------------------------------------------------------------------------|---------------------------------------------------------------------------------------------------|-------------------------------------------------------------------------------------------------------|
|                           |                    |  | National Taiwan University Hospital                                    | Taiwan University Centers of Genomic and Precision Medicine                                       | Chwen Chang, Pei-Jer Chen, Sui-Yuan Chang                                                             |
| hCoV-19/Taiwan/NTU60/2021 | EPI_ISL_1 - 667472 |  | Department of Laboratory Medicine, National Taiwan University Hospital | Microbial Genomics Core Lab, National Taiwan University Centers of Genomic and Precision Medicine | Shiou-Hwei Yeh, You-Yu Lin, Ya-Yun Lai, Chiao-Ling Li, Shan-Chwen Chang, Pei-Jer Chen, Sui-Yuan Chang |
| hCoV-19/Taiwan/NTU59/2021 | EPI_ISL_1 - 667471 |  | Department of Laboratory Medicine, National Taiwan University Hospital | Microbial Genomics Core Lab, National Taiwan University Centers of Genomic and Precision Medicine | Shiou-Hwei Yeh, You-Yu Lin, Ya-Yun Lai, Chiao-Ling Li, Shan-Chwen Chang, Pei-Jer Chen, Sui-Yuan Chang |
| hCoV-19/Taiwan/NTU58/2021 | EPI_ISL_1 - 667469 |  | Department of Laboratory Medicine, National Taiwan University Hospital | Microbial Genomics Core Lab, National Taiwan University Centers of Genomic and Precision Medicine | Shiou-Hwei Yeh, You-Yu Lin, Ya-Yun Lai, Chiao-Ling Li, Shan-Chwen Chang, Pei-Jer Chen, Sui-Yuan Chang |
| hCoV-19/Taiwan/NTU57/2021 | EPI_ISL_1 - 020316 |  | Department of Laboratory Medicine, National Taiwan University Hospital | Microbial Genomics Core Lab, National Taiwan University Centers of Genomic and Precision Medicine | Shiou-Hwei Yeh, You-Yu Lin, Ya-Yun Lai, Chiao-Ling Li, Shan-Chwen Chang, Pei-Jer Chen, Sui-Yuan Chang |
| hCoV-19/Taiwan/NTU56/2021 | EPI_ISL_1 - 020315 |  | Department of Laboratory Medicine, National Taiwan University Hospital | Microbial Genomics Core Lab, National Taiwan University Centers of Genomic and Precision Medicine | Shiou-Hwei Yeh, You-Yu Lin, Ya-Yun Lai, Chiao-Ling Li, Shan-Chwen Chang, Pei-Jer Chen, Sui-Yuan Chang |
| hCoV-                     | EPI_ISL_1 -        |  | Department of                                                          | Microbial                                                                                         | Shiou-Hwei Yeh, You-                                                                                  |

|                           |                |   |                                                                        |                                                                                                   |                                                                                                       |
|---------------------------|----------------|---|------------------------------------------------------------------------|---------------------------------------------------------------------------------------------------|-------------------------------------------------------------------------------------------------------|
| 19/Taiwan/NTU55/2021      | 010731         | - | Laboratory Medicine, National Taiwan University Hospital               | Genomics Core Lab, National Taiwan University Centers of Genomic and Precision Medicine           | Yu Lin, Ya-Yun Lai, Chiao-Ling Li, Shan-Chwen Chang, Pei-Jer Chen, Sui-Yuan Chang                     |
| hCoV-19/Taiwan/NTU54/2021 | EPI_ISL_039160 | - | Department of Laboratory Medicine, National Taiwan University Hospital | Microbial Genomics Core Lab, National Taiwan University Centers of Genomic and Precision Medicine | Shiou-Hwei Yeh, You-Yu Lin, Ya-Yun Lai, Chiao-Ling Li, Shan-Chwen Chang, Pei-Jer Chen, Sui-Yuan Chang |
| hCoV-19/Taiwan/NTU53/2021 | EPI_ISL_010730 | - | Department of Laboratory Medicine, National Taiwan University Hospital | Microbial Genomics Core Lab, National Taiwan University Centers of Genomic and Precision Medicine | Shiou-Hwei Yeh, You-Yu Lin, Ya-Yun Lai, Chiao-Ling Li, Shan-Chwen Chang, Pei-Jer Chen, Sui-Yuan Chang |
| hCoV-19/Taiwan/NTU52/2021 | EPI_ISL_041958 | - | Department of Laboratory Medicine, National Taiwan University Hospital | Microbial Genomics Core Lab, National Taiwan University Centers of Genomic and Precision Medicine | Shiou-Hwei Yeh, You-Yu Lin, Ya-Yun Lai, Chiao-Ling Li, Shan-Chwen Chang, Pei-Jer Chen, Sui-Yuan Chang |
| hCoV-19/Taiwan/NTU51/2021 | EPI_ISL_010729 | - | Department of Laboratory Medicine, National Taiwan University Hospital | Microbial Genomics Core Lab, National Taiwan University Centers of Genomic and Precision Medicine | Shiou-Hwei Yeh, You-Yu Lin, Ya-Yun Lai, Chiao-Ling Li, Shan-Chwen Chang, Pei-Jer Chen, Sui-Yuan Chang |
| hCoV-19/Taiwan/NTU50/2021 | EPI_ISL_041957 | - | Department of Laboratory Medicine, National Taiwan University Hospital | Microbial Genomics Core Lab, National Taiwan University Centers of Genomic and Precision Medicine | Shiou-Hwei Yeh, You-Yu Lin, Ya-Yun Lai, Chiao-Ling Li, Shan-Chwen Chang, Pei-Jer Chen, Sui-Yuan Chang |

|                           |                 |   | Medicine                                                               |                                                                                                   |                                                                                                       |
|---------------------------|-----------------|---|------------------------------------------------------------------------|---------------------------------------------------------------------------------------------------|-------------------------------------------------------------------------------------------------------|
| hCoV-19/Taiwan/NTU49/2020 | EPI_ISL_1010728 | - | Department of Laboratory Medicine, National Taiwan University Hospital | Microbial Genomics Core Lab, National Taiwan University Centers of Genomic and Precision Medicine | Shiou-Hwei Yeh, You-Yu Lin, Ya-Yun Lai, Chiao-Ling Li, Shan-Chwen Chang, Pei-Jer Chen, Sui-Yuan Chang |
| hCoV-19/Taiwan/NTU48/2020 | EPI_ISL_872599  | - | Department of Laboratory Medicine, National Taiwan University Hospital | Microbial Genomics Core Lab, National Taiwan University Centers of Genomic and Precision Medicine | Shiou-Hwei Yeh, You-Yu Lin, Ya-Yun Lai, Chiao-Ling Li, Shan-Chwen Chang, Pei-Jer Chen, Sui-Yuan Chang |
| hCoV-19/Taiwan/NTU47/2020 | EPI_ISL_872598  | - | Department of Laboratory Medicine, National Taiwan University Hospital | Microbial Genomics Core Lab, National Taiwan University Centers of Genomic and Precision Medicine | Shiou-Hwei Yeh, You-Yu Lin, Ya-Yun Lai, Chiao-Ling Li, Shan-Chwen Chang, Pei-Jer Chen, Sui-Yuan Chang |
| hCoV-19/Taiwan/NTU46/2020 | EPI_ISL_872597  | - | Department of Laboratory Medicine, National Taiwan University Hospital | Microbial Genomics Core Lab, National Taiwan University Centers of Genomic and Precision Medicine | Shiou-Hwei Yeh, You-Yu Lin, Ya-Yun Lai, Chiao-Ling Li, Shan-Chwen Chang, Pei-Jer Chen, Sui-Yuan Chang |
| hCoV-19/Taiwan/NTU45/2020 | EPI_ISL_872596  | - | Department of Laboratory Medicine, National Taiwan University Hospital | Microbial Genomics Core Lab, National Taiwan University Centers of Genomic and Precision Medicine | Shiou-Hwei Yeh, You-Yu Lin, Ya-Yun Lai, Chiao-Ling Li, Shan-Chwen Chang, Pei-Jer Chen, Sui-Yuan Chang |
| hCoV-19/Taiwan/NTU44/2020 | EPI_ISL_872595  | - | Department of Laboratory Medicine, National Taiwan University Hospital | Microbial Genomics Core Lab, National Taiwan University Centers of                                | Shiou-Hwei Yeh, You-Yu Lin, Ya-Yun Lai, Chiao-Ling Li, Shan-Chwen Chang, Pei-Jer Chen, Sui-Yuan Chang |

|                           |                 |   |                                                                        |                                                                                                   |                                                                                                       |
|---------------------------|-----------------|---|------------------------------------------------------------------------|---------------------------------------------------------------------------------------------------|-------------------------------------------------------------------------------------------------------|
|                           |                 |   |                                                                        | Genomic and Precision Medicine                                                                    |                                                                                                       |
| hCoV-19/Taiwan/NTU43/2020 | EPI_ISL_2307350 | - | Department of Laboratory Medicine, National Taiwan University Hospital | Microbial Genomics Core Lab, National Taiwan University Centers of Genomic and Precision Medicine | Shiou-Hwei Yeh, You-Yu Lin, Ya-Yun Lai, Chiao-Ling Li, Shan-Chwen Chang, Pei-Jer Chen, Sui-Yuan Chang |
| hCoV-19/Taiwan/NTU42/2020 | EPI_ISL_872594  | - | Department of Laboratory Medicine, National Taiwan University Hospital | Microbial Genomics Core Lab, National Taiwan University Centers of Genomic and Precision Medicine | Shiou-Hwei Yeh, You-Yu Lin, Ya-Yun Lai, Chiao-Ling Li, Shan-Chwen Chang, Pei-Jer Chen, Sui-Yuan Chang |
| hCoV-19/Taiwan/NTU41/2020 | EPI_ISL_872593  | - | Department of Laboratory Medicine, National Taiwan University Hospital | Microbial Genomics Core Lab, National Taiwan University Centers of Genomic and Precision Medicine | Shiou-Hwei Yeh, You-Yu Lin, Ya-Yun Lai, Chiao-Ling Li, Shan-Chwen Chang, Pei-Jer Chen, Sui-Yuan Chang |
| hCoV-19/Taiwan/NTU40/2020 | EPI_ISL_872592  | - | Department of Laboratory Medicine, National Taiwan University Hospital | Microbial Genomics Core Lab, National Taiwan University Centers of Genomic and Precision Medicine | Shiou-Hwei Yeh, You-Yu Lin, Ya-Yun Lai, Chiao-Ling Li, Shan-Chwen Chang, Pei-Jer Chen, Sui-Yuan Chang |
| hCoV-19/Taiwan/NTU39/2020 | EPI_ISL_872591  | - | Department of Laboratory Medicine, National Taiwan University Hospital | Microbial Genomics Core Lab, National Taiwan University Centers of Genomic and Precision Medicine | Shiou-Hwei Yeh, You-Yu Lin, Ya-Yun Lai, Chiao-Ling Li, Shan-Chwen Chang, Pei-Jer Chen, Sui-Yuan Chang |
| hCoV-19/Taiwan/NTU38/2020 | EPI_ISL_738065  | - | Department of Laboratory Medicine, National Taiwan University Hospital | Microbial Genomics Core Lab, National Taiwan University Centers of Genomic and Precision Medicine | Shiou-Hwei Yeh, You-Yu Lin, Ya-Yun Lai, Chiao-Ling Li, Shan-Chwen Chang, Pei-Jer Chen, Sui-Yuan Chang |

|                           |                |   |                                                                        |                                                                                                   |                                                                                                       |
|---------------------------|----------------|---|------------------------------------------------------------------------|---------------------------------------------------------------------------------------------------|-------------------------------------------------------------------------------------------------------|
|                           |                |   | University Hospital                                                    | University Centers of Genomic and Precision Medicine                                              | Chen, Sui-Yuan Chang                                                                                  |
| hCoV-19/Taiwan/NTU37/2020 | EPI_ISL_740547 | - | Department of Laboratory Medicine, National Taiwan University Hospital | Microbial Genomics Core Lab, National Taiwan University Centers of Genomic and Precision Medicine | Shiou-Hwei Yeh, You-Yu Lin, Ya-Yun Lai, Chiao-Ling Li, Shan-Chwen Chang, Pei-Jer Chen, Sui-Yuan Chang |
| hCoV-19/Taiwan/NTU36/2020 | EPI_ISL_738064 | - | Department of Laboratory Medicine, National Taiwan University Hospital | Microbial Genomics Core Lab, National Taiwan University Centers of Genomic and Precision Medicine | Shiou-Hwei Yeh, You-Yu Lin, Ya-Yun Lai, Chiao-Ling Li, Shan-Chwen Chang, Pei-Jer Chen, Sui-Yuan Chang |
| hCoV-19/Taiwan/NTU35/2020 | EPI_ISL_693306 | - | Department of Laboratory Medicine, National Taiwan University Hospital | Microbial Genomics Core Lab, National Taiwan University Centers of Genomic and Precision Medicine | Shiou-Hwei Yeh, You-Yu Lin, Ya-Yun Lai, Chiao-Ling Li, Shan-Chwen Chang, Pei-Jer Chen, Sui-Yuan Chang |
| hCoV-19/Taiwan/NTU34/2020 | EPI_ISL_693305 | - | Department of Laboratory Medicine, National Taiwan University Hospital | Microbial Genomics Core Lab, National Taiwan University Centers of Genomic and Precision Medicine | Shiou-Hwei Yeh, You-Yu Lin, Ya-Yun Lai, Chiao-Ling Li, Shan-Chwen Chang, Pei-Jer Chen, Sui-Yuan Chang |
| hCoV-19/Taiwan/NTU33/2020 | EPI_ISL_693304 | - | Department of Laboratory Medicine, National Taiwan University Hospital | Microbial Genomics Core Lab, National Taiwan University Centers of Genomic and Precision Medicine | Shiou-Hwei Yeh, You-Yu Lin, Ya-Yun Lai, Chiao-Ling Li, Shan-Chwen Chang, Pei-Jer Chen, Sui-Yuan Chang |
| hCoV-19/Taiwan/NTU32/2020 | EPI_ISL_693303 | - | Department of Laboratory                                               | Microbial Genomics Core                                                                           | Shiou-Hwei Yeh, You-Yu Lin, Ya-Yun Lai,                                                               |



|                                   |                    |   |                                                                                       |                                                                                                                           |                                                                                                                     |
|-----------------------------------|--------------------|---|---------------------------------------------------------------------------------------|---------------------------------------------------------------------------------------------------------------------------|---------------------------------------------------------------------------------------------------------------------|
| 0                                 |                    |   | Medicine,<br>National Taiwan<br>University<br>Hospital                                | Lab, National<br>Taiwan<br>University<br>Centers of<br>Genomic and<br>Precision<br>Medicine                               | Chiao-Ling Li, Shan-<br>Chwen Chang, Pei-Jer<br>Chen, Sui-Yuan Chang                                                |
| hCoV-<br>19/Taiwan/NTU31/202<br>0 | EPI_ISL_6<br>93302 | - | Department of<br>Laboratory<br>Medicine,<br>National Taiwan<br>University<br>Hospital | Microbial<br>Genomics Core<br>Lab, National<br>Taiwan<br>University<br>Centers of<br>Genomic and<br>Precision<br>Medicine | Shiou-Hwei Yeh, You-<br>Yu Lin, Ya-Yun Lai,<br>Chiao-Ling Li, Shan-<br>Chwen Chang, Pei-Jer<br>Chen, Sui-Yuan Chang |
| hCoV-<br>19/Taiwan/NTU30/202<br>0 | EPI_ISL_5<br>34336 | - | Department of<br>Laboratory<br>Medicine,<br>National Taiwan<br>University<br>Hospital | Microbial<br>Genomics Core<br>Lab, National<br>Taiwan<br>University<br>Centers of<br>Genomic and<br>Precision<br>Medicine | Shiou-Hwei Yeh, You-<br>Yu Lin, Ya-Yun Lai,<br>Chiao-Ling Li, Shan-<br>Chwen Chang, Pei-Jer<br>Chen, Sui-Yuan Chang |
| hCoV-<br>19/Taiwan/NTU29/202<br>0 | EPI_ISL_4<br>63007 | - | Department of<br>Laboratory<br>Medicine,<br>National Taiwan<br>University<br>Hospital | Microbial<br>Genomics Core<br>Lab, National<br>Taiwan<br>University<br>Centers of<br>Genomic and<br>Precision<br>Medicine | Shiou-Hwei Yeh, You-<br>Yu Lin, Ya-Yun Lai,<br>Chiao-Ling Li, Shan-<br>Chwen Chang, Pei-Jer<br>Chen, Sui-Yuan Chang |
| hCoV-<br>19/Taiwan/NTU28/202<br>0 | EPI_ISL_4<br>47622 | - | Department of<br>Laboratory<br>Medicine,<br>National Taiwan<br>University<br>Hospital | Microbial<br>Genomics Core<br>Lab, National<br>Taiwan<br>University<br>Centers of<br>Genomic and<br>Precision<br>Medicine | Shiou-Hwei Yeh, You-<br>Yu Lin, Ya-Yun Lai,<br>Chiao-Ling Li, Shan-<br>Chwen Chang, Pei-Jer<br>Chen, Sui-Yuan Chang |
| hCoV-<br>19/Taiwan/NTU27/202<br>0 | EPI_ISL_4<br>47621 | - | Department of<br>Laboratory<br>Medicine,<br>National Taiwan<br>University<br>Hospital | Microbial<br>Genomics Core<br>Lab, National<br>Taiwan<br>University<br>Centers of<br>Genomic and<br>Precision<br>Medicine | Shiou-Hwei Yeh, You-<br>Yu Lin, Ya-Yun Lai,<br>Chiao-Ling Li, Shan-<br>Chwen Chang, Pei-Jer<br>Chen, Sui-Yuan Chang |

|                            |                      |   |                                                                        |                                                                                                   |                                                                                                       |
|----------------------------|----------------------|---|------------------------------------------------------------------------|---------------------------------------------------------------------------------------------------|-------------------------------------------------------------------------------------------------------|
| hCoV-19/Taiwan/NTU26/2020  | EPI_ISL_4<br>47620   | - | Department of Laboratory Medicine, National Taiwan University Hospital | Microbial Genomics Core Lab, National Taiwan University Centers of Genomic and Precision Medicine | Shiou-Hwei Yeh, You-Yu Lin, Ya-Yun Lai, Chiao-Ling Li, Shan-Chwen Chang, Pei-Jer Chen, Sui-Yuan Chang |
| hCoV-19/Taiwan/NTU25/2020  | EPI_ISL_4<br>47619   | - | Department of Laboratory Medicine, National Taiwan University Hospital | Microbial Genomics Core Lab, National Taiwan University Centers of Genomic and Precision Medicine | Shiou-Hwei Yeh, You-Yu Lin, Ya-Yun Lai, Chiao-Ling Li, Shan-Chwen Chang, Pei-Jer Chen, Sui-Yuan Chang |
| hCoV-19/Taiwan/NTU24/2020  | EPI_ISL_4<br>47618   | - | Department of Laboratory Medicine, National Taiwan University Hospital | Microbial Genomics Core Lab, National Taiwan University Centers of Genomic and Precision Medicine | Shiou-Hwei Yeh, You-Yu Lin, Ya-Yun Lai, Chiao-Ling Li, Shan-Chwen Chang, Pei-Jer Chen, Sui-Yuan Chang |
| hCoV-19/Taiwan/NTU23/2020  | EPI_ISL_4<br>47617   | - | Department of Laboratory Medicine, National Taiwan University Hospital | Microbial Genomics Core Lab, National Taiwan University Centers of Genomic and Precision Medicine | Shiou-Hwei Yeh, You-Yu Lin, Ya-Yun Lai, Chiao-Ling Li, Shan-Chwen Chang, Pei-Jer Chen, Sui-Yuan Chang |
| hCoV-19/Taiwan/NTU222/2022 | EPI_ISL_1<br>3949146 | - | Department of Laboratory Medicine, National Taiwan University Hospital | Department of Clinical Laboratory Sciences and Medical Biotechnology, National Taiwan University  | Shiou-Hwei Yeh, Hurng-Yi Wang, Sui-Yuan Chang                                                         |
| hCoV-19/Taiwan/NTU221/2022 | EPI_ISL_1<br>3949145 | - | Department of Laboratory Medicine, National Taiwan University Hospital | Department of Clinical Laboratory Sciences and Medical Biotechnology, National Taiwan University  | Shiou-Hwei Yeh, Hurng-Yi Wang, Sui-Yuan Chang                                                         |

|                            |                      |   |                                                                        |                                                                                                   |                                                                                                       |
|----------------------------|----------------------|---|------------------------------------------------------------------------|---------------------------------------------------------------------------------------------------|-------------------------------------------------------------------------------------------------------|
| hCoV-19/Taiwan/NTU220/2022 | EPI_ISL_1<br>3949144 | - | Department of Laboratory Medicine, National Taiwan University Hospital | Department of Clinical Laboratory Sciences and Medical Biotechnology, National Taiwan University  | Shiou-Hwei Yeh, Hurng-Yi Wang, Sui-Yuan Chang                                                         |
| hCoV-19/Taiwan/NTU22/2020  | EPI_ISL_4<br>47616   | - | Department of Laboratory Medicine, National Taiwan University Hospital | Microbial Genomics Core Lab, National Taiwan University Centers of Genomic and Precision Medicine | Shiou-Hwei Yeh, You-Yu Lin, Ya-Yun Lai, Chiao-Ling Li, Shan-Chwen Chang, Pei-Jer Chen, Sui-Yuan Chang |
| hCoV-19/Taiwan/NTU217/2022 | EPI_ISL_1<br>3949141 | - | Department of Laboratory Medicine, National Taiwan University Hospital | Department of Clinical Laboratory Sciences and Medical Biotechnology, National Taiwan University  | Shiou-Hwei Yeh, Hurng-Yi Wang, Sui-Yuan Chang                                                         |
| hCoV-19/Taiwan/NTU216/2022 | EPI_ISL_1<br>3949140 | - | Department of Laboratory Medicine, National Taiwan University Hospital | Department of Clinical Laboratory Sciences and Medical Biotechnology, National Taiwan University  | Shiou-Hwei Yeh, Hurng-Yi Wang, Sui-Yuan Chang                                                         |
| hCoV-19/Taiwan/NTU215/2022 | EPI_ISL_1<br>3949139 | - | Department of Laboratory Medicine, National Taiwan University Hospital | Department of Clinical Laboratory Sciences and Medical Biotechnology, National Taiwan University  | Shiou-Hwei Yeh, Hurng-Yi Wang, Sui-Yuan Chang                                                         |
| hCoV-19/Taiwan/NTU214/2022 | EPI_ISL_1<br>3949138 | - | Department of Laboratory Medicine, National Taiwan University Hospital | Department of Clinical Laboratory Sciences and Medical Biotechnology, National Taiwan University  | Shiou-Hwei Yeh, Hurng-Yi Wang, Sui-Yuan Chang                                                         |
| hCoV-19/Taiwan/NTU213/2022 | EPI_ISL_1<br>3949137 | - | Department of Laboratory Medicine,                                     | Department of Clinical Laboratory                                                                 | Shiou-Hwei Yeh, Hurng-Yi Wang, Sui-Yuan Chang                                                         |

|                            |                      |   |                                                                        |                                                                                                   |                                                                                                       |
|----------------------------|----------------------|---|------------------------------------------------------------------------|---------------------------------------------------------------------------------------------------|-------------------------------------------------------------------------------------------------------|
|                            |                      |   | National Taiwan University Hospital                                    | Sciences and Medical Biotechnology, National Taiwan University                                    |                                                                                                       |
| hCoV-19/Taiwan/NTU212/2022 | EPI_ISL_1<br>3949136 | - | Department of Laboratory Medicine, National Taiwan University Hospital | Department of Clinical Laboratory Sciences and Medical Biotechnology, National Taiwan University  | Shiou-Hwei Yeh, Hurng-Yi Wang, Sui-Yuan Chang                                                         |
| hCoV-19/Taiwan/NTU211/2022 | EPI_ISL_1<br>3949135 | - | Department of Laboratory Medicine, National Taiwan University Hospital | Department of Clinical Laboratory Sciences and Medical Biotechnology, National Taiwan University  | Shiou-Hwei Yeh, Hurng-Yi Wang, Sui-Yuan Chang                                                         |
| hCoV-19/Taiwan/NTU21/2020  | EPI_ISL_4<br>22422   | - | Department of Laboratory Medicine, National Taiwan University Hospital | Microbial Genomics Core Lab, National Taiwan University Centers of Genomic and Precision Medicine | Shiou-Hwei Yeh, You-Yu Lin, Ya-Yun Lai, Chiao-Ling Li, Shan-Chwen Chang, Pei-Jer Chen, Sui-Yuan Chang |
| hCoV-19/Taiwan/NTU209/2022 | EPI_ISL_1<br>3949133 | - | Department of Laboratory Medicine, National Taiwan University Hospital | Department of Clinical Laboratory Sciences and Medical Biotechnology, National Taiwan University  | Shiou-Hwei Yeh, Hurng-Yi Wang, Sui-Yuan Chang                                                         |
| hCoV-19/Taiwan/NTU208/2022 | EPI_ISL_1<br>3949132 | - | Department of Laboratory Medicine, National Taiwan University Hospital | Department of Clinical Laboratory Sciences and Medical Biotechnology, National Taiwan University  | Shiou-Hwei Yeh, Hurng-Yi Wang, Sui-Yuan Chang                                                         |
| hCoV-19/Taiwan/NTU207/2022 | EPI_ISL_1<br>3949131 | - | Department of Laboratory Medicine, National Taiwan University Hospital | Department of Clinical Laboratory Sciences and Medical Biotechnology,                             | Shiou-Hwei Yeh, Hurng-Yi Wang, Sui-Yuan Chang                                                         |

|                            |                      |   |                                                                        |                                                                                                   |                                                                                                       |
|----------------------------|----------------------|---|------------------------------------------------------------------------|---------------------------------------------------------------------------------------------------|-------------------------------------------------------------------------------------------------------|
|                            |                      |   |                                                                        | National Taiwan University                                                                        |                                                                                                       |
| hCoV-19/Taiwan/NTU206/2022 | EPI_ISL_1<br>3949130 | - | Department of Laboratory Medicine, National Taiwan University Hospital | Department of Clinical Laboratory Sciences and Medical Biotechnology, National Taiwan University  | Shiou-Hwei Yeh, Hurng-Yi Wang, Sui-Yuan Chang                                                         |
| hCoV-19/Taiwan/NTU205/2022 | EPI_ISL_1<br>3949129 | - | Department of Laboratory Medicine, National Taiwan University Hospital | Department of Clinical Laboratory Sciences and Medical Biotechnology, National Taiwan University  | Shiou-Hwei Yeh, Hurng-Yi Wang, Sui-Yuan Chang                                                         |
| hCoV-19/Taiwan/NTU204/2022 | EPI_ISL_1<br>3949128 | - | Department of Laboratory Medicine, National Taiwan University Hospital | Department of Clinical Laboratory Sciences and Medical Biotechnology, National Taiwan University  | Shiou-Hwei Yeh, Hurng-Yi Wang, Sui-Yuan Chang                                                         |
| hCoV-19/Taiwan/NTU202/2022 | EPI_ISL_1<br>3949126 | - | Department of Laboratory Medicine, National Taiwan University Hospital | Department of Clinical Laboratory Sciences and Medical Biotechnology, National Taiwan University  | Shiou-Hwei Yeh, Hurng-Yi Wang, Sui-Yuan Chang                                                         |
| hCoV-19/Taiwan/NTU20/2020  | EPI_ISL_4<br>22421   | - | Department of Laboratory Medicine, National Taiwan University Hospital | Microbial Genomics Core Lab, National Taiwan University Centers of Genomic and Precision Medicine | Shiou-Hwei Yeh, You-Yu Lin, Ya-Yun Lai, Chiao-Ling Li, Shan-Chwen Chang, Pei-Jer Chen, Sui-Yuan Chang |
| hCoV-19/Taiwan/NTU190/2022 | EPI_ISL_1<br>3356697 | - | Department of Laboratory Medicine, National Taiwan University Hospital | Department of Clinical Laboratory Sciences and Medical Biotechnology, National Taiwan University  | Shiou-Hwei Yeh, Hurng-Yi Wang, Sui-Yuan Chang                                                         |
| hCoV-                      | EPI_ISL_4            | - | Department of                                                          | Microbial                                                                                         | Shiou-Hwei Yeh, You-                                                                                  |

|                            |                      |   |                                                                        |                                                                                                  |                                                                                   |
|----------------------------|----------------------|---|------------------------------------------------------------------------|--------------------------------------------------------------------------------------------------|-----------------------------------------------------------------------------------|
| 19/Taiwan/NTU19/2020       | 22420                |   | Laboratory Medicine, National Taiwan University Hospital               | Genomics Core Lab, National Taiwan University Centers of Genomic and Precision Medicine          | Yu Lin, Ya-Yun Lai, Chiao-Ling Li, Shan-Chwen Chang, Pei-Jer Chen, Sui-Yuan Chang |
| hCoV-19/Taiwan/NTU189/2022 | EPI_ISL_1<br>3356696 | - | Department of Laboratory Medicine, National Taiwan University Hospital | Department of Clinical Laboratory Sciences and Medical Biotechnology, National Taiwan University | Shiou-Hwei Yeh, Hurng-Yi Wang, Sui-Yuan Chang                                     |
| hCoV-19/Taiwan/NTU188/2022 | EPI_ISL_1<br>3356695 | - | Department of Laboratory Medicine, National Taiwan University Hospital | Department of Clinical Laboratory Sciences and Medical Biotechnology, National Taiwan University | Shiou-Hwei Yeh, Hurng-Yi Wang, Sui-Yuan Chang                                     |
| hCoV-19/Taiwan/NTU187/2022 | EPI_ISL_1<br>3356694 | - | Department of Laboratory Medicine, National Taiwan University Hospital | Department of Clinical Laboratory Sciences and Medical Biotechnology, National Taiwan University | Shiou-Hwei Yeh, Hurng-Yi Wang, Sui-Yuan Chang                                     |
| hCoV-19/Taiwan/NTU181/2022 | EPI_ISL_1<br>3356693 | - | Department of Laboratory Medicine, National Taiwan University Hospital | Department of Clinical Laboratory Sciences and Medical Biotechnology, National Taiwan University | Shiou-Hwei Yeh, Hurng-Yi Wang, Sui-Yuan Chang                                     |
| hCoV-19/Taiwan/NTU180/2022 | EPI_ISL_1<br>3356692 | - | Department of Laboratory Medicine, National Taiwan University Hospital | Department of Clinical Laboratory Sciences and Medical Biotechnology, National Taiwan University | Shiou-Hwei Yeh, Hurng-Yi Wang, Sui-Yuan Chang                                     |
| hCoV-19/Taiwan/NTU18/2020  | EPI_ISL_4<br>47615   | - | Department of Laboratory Medicine, National Taiwan University Hospital | Microbial Genomics Core Lab, National Taiwan University                                          | Shiou-Hwei Yeh, You-Yu Lin, Ya-Yun Lai, Chiao-Ling Li, Shan-Chwen Chang, Pei-Jer  |

|                            |                      |   |                                                                        |                                                                                                  |                                               |
|----------------------------|----------------------|---|------------------------------------------------------------------------|--------------------------------------------------------------------------------------------------|-----------------------------------------------|
|                            |                      |   | University Hospital                                                    | University Centers of Genomic and Precision Medicine                                             | Chen, Sui-Yuan Chang                          |
| hCoV-19/Taiwan/NTU179/2022 | EPI_ISL_1<br>3026396 | - | Department of Laboratory Medicine, National Taiwan University Hospital | Department of Clinical Laboratory Sciences and Medical Biotechnology, National Taiwan University | Shiou-Hwei Yeh, Hurng-Yi Wang, Sui-Yuan Chang |
| hCoV-19/Taiwan/NTU178/2022 | EPI_ISL_1<br>3026394 | - | Department of Laboratory Medicine, National Taiwan University Hospital | Department of Clinical Laboratory Sciences and Medical Biotechnology, National Taiwan University | Shiou-Hwei Yeh, Hurng-Yi Wang, Sui-Yuan Chang |
| hCoV-19/Taiwan/NTU177/2022 | EPI_ISL_1<br>3026392 | - | Department of Laboratory Medicine, National Taiwan University Hospital | Department of Clinical Laboratory Sciences and Medical Biotechnology, National Taiwan University | Shiou-Hwei Yeh, Hurng-Yi Wang, Sui-Yuan Chang |
| hCoV-19/Taiwan/NTU176/2022 | EPI_ISL_1<br>3026390 | - | Department of Laboratory Medicine, National Taiwan University Hospital | Department of Clinical Laboratory Sciences and Medical Biotechnology, National Taiwan University | Shiou-Hwei Yeh, Hurng-Yi Wang, Sui-Yuan Chang |
| hCoV-19/Taiwan/NTU175/2022 | EPI_ISL_1<br>3026387 | - | Department of Laboratory Medicine, National Taiwan University Hospital | Department of Clinical Laboratory Sciences and Medical Biotechnology, National Taiwan University | Shiou-Hwei Yeh, Hurng-Yi Wang, Sui-Yuan Chang |
| hCoV-19/Taiwan/NTU174/2022 | EPI_ISL_1<br>3026349 | - | Department of Laboratory Medicine, National Taiwan University Hospital | Department of Clinical Laboratory Sciences and Medical Biotechnology, National Taiwan            | Shiou-Hwei Yeh, Hurng-Yi Wang, Sui-Yuan Chang |

|                            |                      |   | University                                                             |                                                                                                   |                                                                                                       |
|----------------------------|----------------------|---|------------------------------------------------------------------------|---------------------------------------------------------------------------------------------------|-------------------------------------------------------------------------------------------------------|
| hCoV-19/Taiwan/NTU173/2022 | EPI_ISL_1<br>3026317 | - | Department of Laboratory Medicine, National Taiwan University Hospital | Department of Clinical Laboratory Sciences and Medical Biotechnology, National Taiwan University  | Shiou-Hwei Yeh, Hurng-Yi Wang, Sui-Yuan Chang                                                         |
| hCoV-19/Taiwan/NTU172/2022 | EPI_ISL_1<br>2892377 | - | Department of Laboratory Medicine, National Taiwan University Hospital | Department of Clinical Laboratory Sciences and Medical Biotechnology, National Taiwan University  | Shiou-Hwei Yeh, Hurng-Yi Wang, Sui-Yuan Chang                                                         |
| hCoV-19/Taiwan/NTU17/2020  | EPI_ISL_4<br>22419   | - | Department of Laboratory Medicine, National Taiwan University Hospital | Microbial Genomics Core Lab, National Taiwan University Centers of Genomic and Precision Medicine | Shiou-Hwei Yeh, You-Yu Lin, Ya-Yun Lai, Chiao-Ling Li, Shan-Chwen Chang, Pei-Jer Chen, Sui-Yuan Chang |
| hCoV-19/Taiwan/NTU16/2020  | EPI_ISL_4<br>22418   | - | Department of Laboratory Medicine, National Taiwan University Hospital | Microbial Genomics Core Lab, National Taiwan University Centers of Genomic and Precision Medicine | Shiou-Hwei Yeh, You-Yu Lin, Ya-Yun Lai, Chiao-Ling Li, Shan-Chwen Chang, Pei-Jer Chen, Sui-Yuan Chang |
| hCoV-19/Taiwan/NTU15/2020  | EPI_ISL_4<br>22417   | - | Department of Laboratory Medicine, National Taiwan University Hospital | Microbial Genomics Core Lab, National Taiwan University Centers of Genomic and Precision Medicine | Shiou-Hwei Yeh, You-Yu Lin, Ya-Yun Lai, Chiao-Ling Li, Shan-Chwen Chang, Pei-Jer Chen, Sui-Yuan Chang |
| hCoV-19/Taiwan/NTU142/2022 | EPI_ISL_1<br>3105945 | - | Department of Laboratory Medicine, National Taiwan University Hospital | Department of Clinical Laboratory Sciences and Medical Biotechnology, National Taiwan University  | Shiou-Hwei Yeh, Hurng-Yi Wang, Sui-Yuan Chang                                                         |



|                            |                      |   |                                                                        |                                                                                                   |                                                                                                       |
|----------------------------|----------------------|---|------------------------------------------------------------------------|---------------------------------------------------------------------------------------------------|-------------------------------------------------------------------------------------------------------|
| hCoV-19/Taiwan/NTU14/2020  | EPI_ISL_4<br>22416   | - | Department of Laboratory Medicine, National Taiwan University Hospital | Microbial Genomics Core Lab, National Taiwan University Centers of Genomic and Precision Medicine | Shiou-Hwei Yeh, You-Yu Lin, Ya-Yun Lai, Chiao-Ling Li, Shan-Chwen Chang, Pei-Jer Chen, Sui-Yuan Chang |
| hCoV-19/Taiwan/NTU139/2022 | EPI_ISL_1<br>1302937 | - | Department of Laboratory Medicine, National Taiwan University Hospital | Department of Clinical Laboratory Sciences and Medical Biotechnology, National Taiwan University  | Shiou-Hwei Yeh, Hurng-Yi Wang, Sui-Yuan Chang                                                         |
| hCoV-19/Taiwan/NTU138/2022 | EPI_ISL_1<br>1302936 | - | Department of Laboratory Medicine, National Taiwan University Hospital | Department of Clinical Laboratory Sciences and Medical Biotechnology, National Taiwan University  | Shiou-Hwei Yeh, Hurng-Yi Wang, Sui-Yuan Chang                                                         |
| hCoV-19/Taiwan/NTU137/2022 | EPI_ISL_1<br>1302895 | - | Department of Laboratory Medicine, National Taiwan University Hospital | Department of Clinical Laboratory Sciences and Medical Biotechnology, National Taiwan University  | Shiou-Hwei Yeh, Hurng-Yi Wang, Sui-Yuan Chang                                                         |
| hCoV-19/Taiwan/NTU136/2022 | EPI_ISL_1<br>1302894 | - | Department of Laboratory Medicine, National Taiwan University Hospital | Department of Clinical Laboratory Sciences and Medical Biotechnology, National Taiwan University  | Shiou-Hwei Yeh, Hurng-Yi Wang, Sui-Yuan Chang                                                         |
| hCoV-19/Taiwan/NTU135/2022 | EPI_ISL_1<br>1302893 | - | Department of Laboratory Medicine, National Taiwan University Hospital | Department of Clinical Laboratory Sciences and Medical Biotechnology, National Taiwan University  | Shiou-Hwei Yeh, Hurng-Yi Wang, Sui-Yuan Chang                                                         |
| hCoV-19/Taiwan/NTU134/2022 | EPI_ISL_1<br>1302892 | - | Department of Laboratory Medicine,                                     | Department of Clinical Laboratory                                                                 | Shiou-Hwei Yeh, Hurng-Yi Wang, Sui-Yuan Chang                                                         |

|                            |                 |   |                                                                        |                                                                                                   |                                                                                                       |
|----------------------------|-----------------|---|------------------------------------------------------------------------|---------------------------------------------------------------------------------------------------|-------------------------------------------------------------------------------------------------------|
|                            |                 |   | National Taiwan University Hospital                                    | Sciences and Medical Biotechnology, National Taiwan University                                    |                                                                                                       |
| hCoV-19/Taiwan/NTU133/2022 | EPI_ISL_1302891 | - | Department of Laboratory Medicine, National Taiwan University Hospital | Department of Clinical Laboratory Sciences and Medical Biotechnology, National Taiwan University  | Shiou-Hwei Yeh, Hurng-Yi Wang, Sui-Yuan Chang                                                         |
| hCoV-19/Taiwan/NTU132/2022 | EPI_ISL_1302849 | - | Department of Laboratory Medicine, National Taiwan University Hospital | Department of Clinical Laboratory Sciences and Medical Biotechnology, National Taiwan University  | Shiou-Hwei Yeh, Hurng-Yi Wang, Sui-Yuan Chang                                                         |
| hCoV-19/Taiwan/NTU130/2022 | EPI_ISL_1302804 | - | Department of Laboratory Medicine, National Taiwan University Hospital | Department of Clinical Laboratory Sciences and Medical Biotechnology, National Taiwan University  | Shiou-Hwei Yeh, Hurng-Yi Wang, Sui-Yuan Chang                                                         |
| hCoV-19/Taiwan/NTU13/2020  | EPI_ISL_22415   | - | Department of Laboratory Medicine, National Taiwan University Hospital | Microbial Genomics Core Lab, National Taiwan University Centers of Genomic and Precision Medicine | Shiou-Hwei Yeh, You-Yu Lin, Ya-Yun Lai, Chiao-Ling Li, Shan-Chwen Chang, Pei-Jer Chen, Sui-Yuan Chang |
| hCoV-19/Taiwan/NTU129/2022 | EPI_ISL_1302740 | - | Department of Laboratory Medicine, National Taiwan University Hospital | Department of Clinical Laboratory Sciences and Medical Biotechnology, National Taiwan University  | Shiou-Hwei Yeh, Hurng-Yi Wang, Sui-Yuan Chang                                                         |
| hCoV-19/Taiwan/NTU125/2021 | EPI_ISL_1333354 | - | Department of Laboratory Medicine, National Taiwan University Hospital | Department of Clinical Laboratory Sciences and Medical Biotechnology,                             | Sui-Yuan Chang                                                                                        |

|                            |                      |   |                                                                        |                                                                                                   |                                                                                                       |
|----------------------------|----------------------|---|------------------------------------------------------------------------|---------------------------------------------------------------------------------------------------|-------------------------------------------------------------------------------------------------------|
|                            |                      |   |                                                                        | National Taiwan University                                                                        |                                                                                                       |
| hCoV-19/Taiwan/NTU124/2021 | EPI_ISL_1<br>1333351 | - | Department of Laboratory Medicine, National Taiwan University Hospital | Department of Clinical Laboratory Sciences and Medical Biotechnology, National Taiwan University  | Sui-Yuan Chang                                                                                        |
| hCoV-19/Taiwan/NTU123/2021 | EPI_ISL_1<br>1362244 | - | Department of Laboratory Medicine, National Taiwan University Hospital | Department of Clinical Laboratory Sciences and Medical Biotechnology, National Taiwan University  | Sui-Yuan Chang                                                                                        |
| hCoV-19/Taiwan/NTU120/2021 | EPI_ISL_1<br>1362242 | - | Department of Laboratory Medicine, National Taiwan University Hospital | Department of Clinical Laboratory Sciences and Medical Biotechnology, National Taiwan University  | Sui-Yuan Chang                                                                                        |
| hCoV-19/Taiwan/NTU12/2020  | EPI_ISL_4<br>22414   | - | Department of Laboratory Medicine, National Taiwan University Hospital | Microbial Genomics Core Lab, National Taiwan University Centers of Genomic and Precision Medicine | Shiou-Hwei Yeh, You-Yu Lin, Ya-Yun Lai, Chiao-Ling Li, Shan-Chwen Chang, Pei-Jer Chen, Sui-Yuan Chang |
| hCoV-19/Taiwan/NTU118/2021 | EPI_ISL_1<br>3618359 | - | Department of Laboratory Medicine, National Taiwan University Hospital | Department of Clinical Laboratory Sciences and Medical Biotechnology, National Taiwan University  | Shiou-Hwei Yeh, Hurng-Yi Wang, Sui-Yuan Chang                                                         |
| hCoV-19/Taiwan/NTU117/2021 | EPI_ISL_1<br>1362241 | - | Department of Laboratory Medicine, National Taiwan University Hospital | Department of Clinical Laboratory Sciences and Medical Biotechnology, National Taiwan University  | Sui-Yuan Chang                                                                                        |
| hCoV-                      | EPI_ISL_1            | - | Department of                                                          | Department of                                                                                     | Sui-Yuan Chang                                                                                        |

|                            |                   |   |                                                                        |                                                                                                  |                                               |
|----------------------------|-------------------|---|------------------------------------------------------------------------|--------------------------------------------------------------------------------------------------|-----------------------------------------------|
| 19/Taiwan/NTU116/2021      | 1333513           |   | Laboratory Medicine, National Taiwan University Hospital               | Clinical Laboratory Sciences and Medical Biotechnology, National Taiwan University               |                                               |
| hCoV-19/Taiwan/NTU115/2021 | EPI_ISL_1 3618358 | - | Department of Laboratory Medicine, National Taiwan University Hospital | Department of Clinical Laboratory Sciences and Medical Biotechnology, National Taiwan University | Shiou-Hwei Yeh, Hurng-Yi Wang, Sui-Yuan Chang |
| hCoV-19/Taiwan/NTU114/2021 | EPI_ISL_1 3618357 | - | Department of Laboratory Medicine, National Taiwan University Hospital | Department of Clinical Laboratory Sciences and Medical Biotechnology, National Taiwan University | Shiou-Hwei Yeh, Hurng-Yi Wang, Sui-Yuan Chang |
| hCoV-19/Taiwan/NTU113/2021 | EPI_ISL_1 1362240 | - | Department of Laboratory Medicine, National Taiwan University Hospital | Department of Clinical Laboratory Sciences and Medical Biotechnology, National Taiwan University | Sui-Yuan Chang                                |
| hCoV-19/Taiwan/NTU112/2021 | EPI_ISL_1 1362239 | - | Department of Laboratory Medicine, National Taiwan University Hospital | Department of Clinical Laboratory Sciences and Medical Biotechnology, National Taiwan University | Sui-Yuan Chang                                |
| hCoV-19/Taiwan/NTU111/2021 | EPI_ISL_1 1362238 | - | Department of Laboratory Medicine, National Taiwan University Hospital | Department of Clinical Laboratory Sciences and Medical Biotechnology, National Taiwan University | Sui-Yuan Chang                                |
| hCoV-19/Taiwan/NTU110/2021 | EPI_ISL_1 1362243 | - | Department of Laboratory Medicine, National Taiwan University Hospital | Department of Clinical Laboratory Sciences and Medical                                           | Sui-Yuan Chang                                |

|                                |                      |   |                                                                                       |                                                                                                                           |                                                                                                                     |
|--------------------------------|----------------------|---|---------------------------------------------------------------------------------------|---------------------------------------------------------------------------------------------------------------------------|---------------------------------------------------------------------------------------------------------------------|
|                                |                      |   | Hospital                                                                              | Biotechnology,<br>National Taiwan<br>University                                                                           |                                                                                                                     |
| hCoV-<br>19/Taiwan/NTU11/2020  | EPI_ISL_4<br>22413   | - | Department of<br>Laboratory<br>Medicine,<br>National Taiwan<br>University<br>Hospital | Microbial<br>Genomics Core<br>Lab, National<br>Taiwan<br>University<br>Centers of<br>Genomic and<br>Precision<br>Medicine | Shiou-Hwei Yeh, You-<br>Yu Lin, Ya-Yun Lai,<br>Chiao-Ling Li, Shan-<br>Chwen Chang, Pei-Jer<br>Chen, Sui-Yuan Chang |
| hCoV-<br>19/Taiwan/NTU109/2021 | EPI_ISL_1<br>3618356 | - | Department of<br>Laboratory<br>Medicine,<br>National Taiwan<br>University<br>Hospital | Department of<br>Clinical<br>Laboratory<br>Sciences and<br>Medical<br>Biotechnology,<br>National Taiwan<br>University     | Shiou-Hwei Yeh,<br>Hurng-Yi Wang, Sui-<br>Yuan Chang                                                                |
| hCoV-<br>19/Taiwan/NTU108/2021 | EPI_ISL_1<br>1333512 | - | Department of<br>Laboratory<br>Medicine,<br>National Taiwan<br>University<br>Hospital | Department of<br>Clinical<br>Laboratory<br>Sciences and<br>Medical<br>Biotechnology,<br>National Taiwan<br>University     | Sui-Yuan Chang                                                                                                      |
| hCoV-<br>19/Taiwan/NTU107/2021 | EPI_ISL_1<br>1333511 | - | Department of<br>Laboratory<br>Medicine,<br>National Taiwan<br>University<br>Hospital | Department of<br>Clinical<br>Laboratory<br>Sciences and<br>Medical<br>Biotechnology,<br>National Taiwan<br>University     | Sui-Yuan Chang                                                                                                      |
| hCoV-<br>19/Taiwan/NTU106/2021 | EPI_ISL_1<br>1362237 | - | Department of<br>Laboratory<br>Medicine,<br>National Taiwan<br>University<br>Hospital | Department of<br>Clinical<br>Laboratory<br>Sciences and<br>Medical<br>Biotechnology,<br>National Taiwan<br>University     | Sui-Yuan Chang                                                                                                      |
| hCoV-<br>19/Taiwan/NTU105/2021 | EPI_ISL_1<br>1333510 | - | Department of<br>Laboratory<br>Medicine,<br>National Taiwan<br>University<br>Hospital | Department of<br>Clinical<br>Laboratory<br>Sciences and<br>Medical<br>Biotechnology,<br>National Taiwan<br>University     | Sui-Yuan Chang                                                                                                      |

|                            |                      |   |                                                                        |                                                                                                   |                                                                                                       |
|----------------------------|----------------------|---|------------------------------------------------------------------------|---------------------------------------------------------------------------------------------------|-------------------------------------------------------------------------------------------------------|
| hCoV-19/Taiwan/NTU104/2021 | EPI_ISL_1<br>1333509 | - | Department of Laboratory Medicine, National Taiwan University Hospital | Department of Clinical Laboratory Sciences and Medical Biotechnology, National Taiwan University  | Sui-Yuan Chang                                                                                        |
| hCoV-19/Taiwan/NTU103/2021 | EPI_ISL_1<br>1333517 | - | Department of Laboratory Medicine, National Taiwan University Hospital | Department of Clinical Laboratory Sciences and Medical Biotechnology, National Taiwan University  | Sui-Yuan Chang                                                                                        |
| hCoV-19/Taiwan/NTU102/2021 | EPI_ISL_1<br>1333508 | - | Department of Laboratory Medicine, National Taiwan University Hospital | Department of Clinical Laboratory Sciences and Medical Biotechnology, National Taiwan University  | Sui-Yuan Chang                                                                                        |
| hCoV-19/Taiwan/NTU101/2021 | EPI_ISL_1<br>1333507 | - | Department of Laboratory Medicine, National Taiwan University Hospital | Department of Clinical Laboratory Sciences and Medical Biotechnology, National Taiwan University  | Sui-Yuan Chang                                                                                        |
| hCoV-19/Taiwan/NTU100/2021 | EPI_ISL_1<br>3618355 | - | Department of Laboratory Medicine, National Taiwan University Hospital | Department of Clinical Laboratory Sciences and Medical Biotechnology, National Taiwan University  | Shiou-Hwei Yeh, Hurng-Yi Wang, Sui-Yuan Chang                                                         |
| hCoV-19/Taiwan/NTU10/2020  | EPI_ISL_4<br>47614   | - | Department of Laboratory Medicine, National Taiwan University Hospital | Microbial Genomics Core Lab, National Taiwan University Centers of Genomic and Precision Medicine | Shiou-Hwei Yeh, You-Yu Lin, Ya-Yun Lai, Chiao-Ling Li, Shan-Chwen Chang, Pei-Jer Chen, Sui-Yuan Chang |
| hCoV-19/Taiwan/NTU09/2020  | EPI_ISL_4<br>22412   | - | Department of Laboratory Medicine,                                     | Microbial Genomics Core Lab, National                                                             | Shiou-Hwei Yeh, You-Yu Lin, Ya-Yun Lai, Chiao-Ling Li, Shan-                                          |

|                           |                   |  |                                                                        |                                                                                                   |                                                                                                       |
|---------------------------|-------------------|--|------------------------------------------------------------------------|---------------------------------------------------------------------------------------------------|-------------------------------------------------------------------------------------------------------|
|                           |                   |  | National Taiwan University Hospital                                    | Taiwan University Centers of Genomic and Precision Medicine                                       | Chwen Chang, Pei-Jer Chen, Sui-Yuan Chang                                                             |
| hCoV-19/Taiwan/NTU08/2020 | EPI_ISL_4 - 22411 |  | Department of Laboratory Medicine, National Taiwan University Hospital | Microbial Genomics Core Lab, National Taiwan University Centers of Genomic and Precision Medicine | Shiou-Hwei Yeh, You-Yu Lin, Ya-Yun Lai, Chiao-Ling Li, Shan-Chwen Chang, Pei-Jer Chen, Sui-Yuan Chang |
| hCoV-19/Taiwan/NTU07/2020 | EPI_ISL_4 - 22410 |  | Department of Laboratory Medicine, National Taiwan University Hospital | Microbial Genomics Core Lab, National Taiwan University Centers of Genomic and Precision Medicine | Shiou-Hwei Yeh, You-Yu Lin, Ya-Yun Lai, Chiao-Ling Li, Shan-Chwen Chang, Pei-Jer Chen, Sui-Yuan Chang |
| hCoV-19/Taiwan/NTU06/2020 | EPI_ISL_4 - 22409 |  | Department of Laboratory Medicine, National Taiwan University Hospital | Microbial Genomics Core Lab, National Taiwan University Centers of Genomic and Precision Medicine | Shiou-Hwei Yeh, You-Yu Lin, Ya-Yun Lai, Chiao-Ling Li, Shan-Chwen Chang, Pei-Jer Chen, Sui-Yuan Chang |
| hCoV-19/Taiwan/NTU05/2020 | EPI_ISL_4 - 22408 |  | Department of Laboratory Medicine, National Taiwan University Hospital | Microbial Genomics Core Lab, National Taiwan University Centers of Genomic and Precision Medicine | Shiou-Hwei Yeh, You-Yu Lin, Ya-Yun Lai, Chiao-Ling Li, Shan-Chwen Chang, Pei-Jer Chen, Sui-Yuan Chang |
| hCoV-19/Taiwan/NTU04/2020 | EPI_ISL_4 - 22407 |  | Department of Laboratory Medicine, National Taiwan University Hospital | Microbial Genomics Core Lab, National Taiwan University Centers of Genomic and Precision Medicine | Shiou-Hwei Yeh, You-Yu Lin, Ya-Yun Lai, Chiao-Ling Li, Shan-Chwen Chang, Pei-Jer Chen, Sui-Yuan Chang |
| hCoV-                     | EPI_ISL_4 -       |  | Department of                                                          | Microbial                                                                                         | Shiou-Hwei Yeh, You-                                                                                  |

|                               |                 |   |                                                                                |                                                                                                   |                                                                                                       |
|-------------------------------|-----------------|---|--------------------------------------------------------------------------------|---------------------------------------------------------------------------------------------------|-------------------------------------------------------------------------------------------------------|
| 19/Taiwan/NTU03/2020          | 13592           |   | Laboratory Medicine, National Taiwan University Hospital                       | Genomics Core Lab, National Taiwan University Centers of Genomic and Precision Medicine           | Yu Lin, Ya-Yun Lai, Chiao-Ling Li, Shan-Chwen Chang, Pei-Jer Chen, Sui-Yuan Chang                     |
| hCoV-19/Taiwan/NTU02/2020     | EPI_ISL_4 10218 | - | Department of Laboratory Medicine, National Taiwan University Hospital         | Microbial Genomics Core Lab, National Taiwan University Centers of Genomic and Precision Medicine | Shiou-Hwei Yeh, You-Yu Lin, Ya-Yun Lai, Chiao-Ling Li, Shan-Chwen Chang, Pei-Jer Chen, Sui-Yuan Chang |
| hCoV-19/Taiwan/NTU01/2020     | EPI_ISL_4 08489 | - | Department of Laboratory Medicine, National Taiwan University Hospital         | Microbial Genomics Core Lab, National Taiwan University Centers of Genomic and Precision Medicine | Shiou-Hwei Yeh, You-Yu Lin, Ya-Yun Lai, Chiao-Ling Li, Shan-Chwen Chang, Pei-Jer Chen, Sui-Yuan Chang |
| hCoV-19/Taiwan/NCKUH-015/2020 | EPI_ISL_4 93208 | - | Virology Lab, Department of Pathology, National Cheng Kung University Hospital | Virology Lab, Department of Pathology, National Cheng Kung University Hospital                    | Huey-Pin Tsai et al                                                                                   |
| hCoV-19/Taiwan/NCKUH-014/2020 | EPI_ISL_4 93207 | - | Virology Lab, Department of Pathology, National Cheng Kung University Hospital | Virology Lab, Department of Pathology, National Cheng Kung University Hospital                    | Huey-Pin Tsai, et al                                                                                  |
| hCoV-19/Taiwan/NCKUH-012/2020 | EPI_ISL_4 93205 | - | Virology Lab, Department of Pathology, National Cheng Kung University Hospital | Virology Lab, Department of Pathology, National Cheng Kung University Hospital                    | Huey-Pin Tsai, et al                                                                                  |
| hCoV-19/Taiwan/NCKUH-007/2020 | EPI_ISL_4 93202 | - | Virology Lab, Department of Pathology, National Cheng Kung University Hospital | Virology Lab, Department of Pathology, National Cheng Kung University Hospital                    | Huey-Pin Tsai, et al                                                                                  |
| hCoV-19/Taiwan/NCKUH-         | EPI_ISL_4 93201 | - | Virology Lab, Department                                                       | Virology Lab, Department                                                                          | Huey-Pin Tsai, et al                                                                                  |



|                                       |                     |   |                                                                                              |                                                                                              |                                                                                                                                                                                                |
|---------------------------------------|---------------------|---|----------------------------------------------------------------------------------------------|----------------------------------------------------------------------------------------------|------------------------------------------------------------------------------------------------------------------------------------------------------------------------------------------------|
| 006/2020                              |                     |   | of Pathology,<br>National Cheng<br>Kung University<br>Hospital                               | of Pathology,<br>National Cheng<br>Kung University<br>Hospital                               |                                                                                                                                                                                                |
| hCoV-<br>19/Taiwan/NCKUH-<br>005/2020 | EPI_ISL_4<br>93200  | - | Virology<br>Lab,Department<br>of Pathology,<br>National Cheng<br>Kung University<br>Hospital | Virology<br>Lab,Department<br>of Pathology,<br>National Cheng<br>Kung University<br>Hospital | Huey-Pin Tsai, et al                                                                                                                                                                           |
| hCoV-<br>19/Taiwan/NCKUH-<br>003/2020 | EPI_ISL_4<br>93199  | - | Virology<br>Lab,Department<br>of Pathology,<br>National Cheng<br>Kung University<br>Hospital | Virology<br>Lab,Department<br>of Pathology,<br>National Cheng<br>Kung University<br>Hospital | Huey-Pin Tsai, et al                                                                                                                                                                           |
| hCoV-<br>19/Taiwan/NCKUH-<br>002/2020 | EPI_ISL_4<br>93198  | - | Virology<br>Lab,Department<br>of Pathology,<br>National Cheng<br>Kung University<br>Hospital | Virology<br>Lab,Department<br>of Pathology,<br>National Cheng<br>Kung University<br>Hospital | Huey-Pin Tsai, et al                                                                                                                                                                           |
| hCoV-<br>19/Taiwan/KMUH-<br>9/2021    | EPI_ISL_8<br>636668 | - | Dr. Jih-Jin Tsai                                                                             | Dr. Jih-Jin Tsai                                                                             | Ping-Chang Lin, Ching-<br>Yi Tsai, Yan-Yi Tsai,<br>Miao-Chen Hsu, Li-Teh<br>Liu, Chun-Hong Chen,<br>Wan-Long Chuang,<br>Jer-Ming Chang,<br>Shang-Jyh Hwang, Inn-<br>Wen Chong, Jih-Jin<br>Tsai |
| hCoV-<br>19/Taiwan/KMUH-<br>8/2021    | EPI_ISL_8<br>636666 | - | Dr. Jih-Jin Tsai                                                                             | Dr. Jih-Jin Tsai                                                                             | Ping-Chang Lin, Ching-<br>Yi Tsai, Yan-Yi Tsai,<br>Miao-Chen Hsu, Li-Teh<br>Liu, Chun-Hong Chen,<br>Wan-Long Chuang,<br>Jer-Ming Chang,<br>Shang-Jyh Hwang, Inn-<br>Wen Chong, Jih-Jin<br>Tsai |
| hCoV-<br>19/Taiwan/KMUH-<br>7/2021    | EPI_ISL_7<br>016498 | - | Dr. Jih-Jin Tsai                                                                             | Dr. Jih-Jin Tsai                                                                             | Ping-Chang Lin, Ching-<br>Yi Tsai, Yan-Yi Tsai,<br>Miao-Chen Hsu, Li-Teh<br>Liu, Chun-Hong Chen,<br>Wan-Long Chuang,<br>Jer-Ming Chang,<br>Shang-Jyh Hwang, Inn-<br>Wen Chong, Jih-Jin<br>Tsai |
| hCoV-<br>19/Taiwan/KMUH-<br>6/2021    | EPI_ISL_7<br>016494 | - | Dr. Jih-Jin Tsai                                                                             | Dr. Jih-Jin Tsai                                                                             | Ping-Chang Lin, Ching-<br>Yi Tsai, Yan-Yi Tsai,<br>Miao-Chen Hsu, Li-Teh                                                                                                                       |

|                                     |                      |   |                                                                                                                               |                                                                                                                               |                                                                                                                                                                                                              |
|-------------------------------------|----------------------|---|-------------------------------------------------------------------------------------------------------------------------------|-------------------------------------------------------------------------------------------------------------------------------|--------------------------------------------------------------------------------------------------------------------------------------------------------------------------------------------------------------|
|                                     |                      |   |                                                                                                                               |                                                                                                                               | Liu, Chun-Hong Chen,<br>Wan-Long Chuang,<br>Jer-Ming Chang,<br>Shang-Jyh Hwang, Inn-<br>Wen Chong, Jih-Jin<br>Tsai                                                                                           |
| hCoV-<br>19/Taiwan/KMUH-<br>5/2021  | EPI_ISL_7<br>016459  | - | Dr. Jih-Jin Tsai                                                                                                              | Dr. Jih-Jin Tsai                                                                                                              | Ping-Chang Lin, Ching-<br>Yi Tsai, Yan-Yi Tsai,<br>Miao-Chen Hsu, Li-Teh<br>Liu, Chun-Hong Chen,<br>Wan-Long Chuang,<br>Jer-Ming Chang,<br>Shang-Jyh Hwang, Inn-<br>Wen Chong, Jih-Jin<br>Tsai               |
| hCoV-<br>19/Taiwan/KMUH-<br>4/2021  | EPI_ISL_7<br>016374  | - | Dr. Jih-Jin Tsai                                                                                                              | Dr. Jih-Jin Tsai                                                                                                              | Ping-Chang Lin, Ching-<br>Yi Tsai, Yan-Yi Tsai,<br>Miao-Chen Hsu, Li-Teh<br>Liu, Chun-Hong Chen,<br>Ko Chang, Wan-Long<br>Chuang, Jer-Ming<br>Chang, Shang-Jyh<br>Hwang, Inn-Wen<br>Chong, Jih-Jin Tsai      |
| hCoV-<br>19/Taiwan/KMUH-<br>3/2021  | EPI_ISL_5<br>395633  | - | Dr. Jih-Jin Tsai                                                                                                              | Dr. Jih-Jin Tsai                                                                                                              | Ping-Chang Lin, Ching-<br>Yi Tsai, Yan-Yi Tsai,<br>Miao-Chen Hsu, Li-Teh<br>Liu, Chun-Hong Chen,<br>Wan-Long Chuang,<br>Jer-Ming Chang,<br>Shang-Jyh Hwang, Inn-<br>Wen Chong, Jih-Jin<br>Tsai               |
| hCoV-<br>19/Taiwan/KMUH-<br>2/2020  | EPI_ISL_5<br>395635  | - | Dr. Jih-Jin Tsai                                                                                                              | Dr. Jih-Jin Tsai                                                                                                              | Ping-Chang Lin, Ching-<br>Yi Tsai, Yan-Yi Tsai,<br>Miao-Chen Hsu, Li-Teh<br>Liu, Chun-Hong Chen,<br>Wan-Long Chuang,<br>Jer-Ming Chang,<br>Shang-Jyh Hwang, Inn-<br>Wen Chong, Jih-Jin<br>Tsai               |
| hCoV-<br>19/Taiwan/KMUH-<br>11/2022 | EPI_ISL_1<br>2005452 | - | Dr. Jih-Jin Tsai<br>Tropical<br>Medicine<br>Center,<br>Kaohsiung<br>Medical<br>University<br>Chung-Ho<br>Memorial<br>Hospital | Dr. Jih-Jin Tsai<br>Tropical<br>Medicine<br>Center,<br>Kaohsiung<br>Medical<br>University<br>Chung-Ho<br>Memorial<br>Hospital | Ping-Chang Lin, Ching-<br>Yi Tsai, Yan-Yi Tsai,<br>Miao-Chen Hsu, Li-Teh<br>Liu, Chun-Hong Chen,<br>Wan-Long Chuang,<br>Jer-Ming Chang,<br>Shang-Yi Lin, Shang-<br>Jyh Hwang, Inn-Wen<br>Chong, Jih-Jin Tsai |

|                                 |                      |   |                                                                                                                               |                                                                                                                               |                                                                                                                                                                                                                                    |
|---------------------------------|----------------------|---|-------------------------------------------------------------------------------------------------------------------------------|-------------------------------------------------------------------------------------------------------------------------------|------------------------------------------------------------------------------------------------------------------------------------------------------------------------------------------------------------------------------------|
| hCoV-19/Taiwan/KMUH-10/2022     | EPI_ISL_1<br>2005416 | - | Dr. Jih-Jin Tsai<br>Tropical<br>Medicine<br>Center,<br>Kaohsiung<br>Medical<br>University<br>Chung-Ho<br>Memorial<br>Hospital | Dr. Jih-Jin Tsai<br>Tropical<br>Medicine<br>Center,<br>Kaohsiung<br>Medical<br>University<br>Chung-Ho<br>Memorial<br>Hospital | Ping-Chang Lin, Ching-Yi Tsai, Yan-Yi Tsai, Miao-Chen Hsu, Li-Teh Liu, Chun-Hong Chen, Wan-Long Chuang, Jer-Ming Chang, Shang-Yi Lin, Shang-Jyh Hwang, Inn-Wen Chong, Jih-Jin Tsai                                                 |
| hCoV-19/Taiwan/KMUH-1/2020      | EPI_ISL_4<br>169856  | - | Dr. Chiaho Shih                                                                                                               | Dr. Chiaho Shih                                                                                                               | An-Ting Liou, Chih-Hsu Chang, Ping-Chang Lin, Yu-Chen Cheng, Ching-Yi Tsai, Wen-Chang Lin, Jeng-Yi Li, Mei-Yeh Jade Lu, Jer-Ming Chang, Shang-Jyh Hwang, Ming-Feng Hou, Inn-Wen Chong, Yuh-Jyh Jong, Jih-Jin Tsai, and Chiaho Shih |
| hCoV-19/Taiwan/IPM-66/2022      | EPI_ISL_1<br>3171423 | - | Institute of<br>Preventive<br>Medicine                                                                                        | Institute of<br>Preventive<br>Medicine                                                                                        | Chun-Hsiang Chiu, Li-Chen Yen, Yi-Chun Liu, Chuen-Mi, Yang, Yu-Hsiu Chang                                                                                                                                                          |
| hCoV-19/Taiwan/IPM-63/2022      | EPI_ISL_1<br>2097305 | - | Institute of<br>Preventive<br>Medicine                                                                                        | Institute of<br>Preventive<br>Medicine                                                                                        | Shu-Chen Hsu, Tein-Yao Chang, Ping-Cheng Liu, Hui-Ping Tsai, Shan-Ko Tsai, Cheng-Cheung Chen, Chun-Hsiang Chiu, Kuo-Ming Yeh, Yi-Jen Hung                                                                                          |
| hCoV-19/Taiwan/CGMH-CGU-89/2021 | EPI_ISL_5<br>160578  | - | Laboratory<br>Medicine                                                                                                        | Department of<br>Laboratory<br>Medicine, Lin-<br>Kou Chang Gung<br>Memorial<br>Hospital,<br>Taoyuan,<br>Taiwan                | Kuo-Chien Tsao, Yu-Nong Gong, Shu-Li Yang, Yi-Chun Liu, Chung-Guei Huang, Mei-Jen Hsiao, Po-Wei Huang, Cheng-Ta Yang, Cheng-Hsun Chiu, Peng-Nien Huang, Kuo-Ming Lee, Guang-Wu Chen, Shin-Ru Shih                                  |
| hCoV-19/Taiwan/CGMH-CGU-88/2021 | EPI_ISL_5<br>160574  | - | Laboratory<br>Medicine                                                                                                        | Department of<br>Laboratory<br>Medicine, Lin-<br>Kou Chang Gung<br>Memorial<br>Hospital,<br>Taoyuan,<br>Taiwan                | Kuo-Chien Tsao, Yu-Nong Gong, Shu-Li Yang, Yi-Chun Liu, Chung-Guei Huang, Mei-Jen Hsiao, Po-Wei Huang, Cheng-Ta Yang, Cheng-Hsun Chiu, Peng-Nien                                                                                   |

|                                         |                     |   |                        |                                                                                                                |                                                                                                                                                                                                                                   |
|-----------------------------------------|---------------------|---|------------------------|----------------------------------------------------------------------------------------------------------------|-----------------------------------------------------------------------------------------------------------------------------------------------------------------------------------------------------------------------------------|
|                                         |                     |   |                        |                                                                                                                | Huang, Kuo-Ming Lee,<br>Guang-Wu Chen, Shin-<br>Ru Shih                                                                                                                                                                           |
| hCoV-<br>19/Taiwan/CGMH-<br>CGU-87/2021 | EPI_ISL_5<br>160570 | - | Laboratory<br>Medicine | Department of<br>Laboratory<br>Medicine, Lin-<br>Kou Chang Gung<br>Memorial<br>Hospital,<br>Taoyuan,<br>Taiwan | Kuo-Chien Tsao, Yu-<br>Nong Gong, Shu-Li<br>Yang, Yi-Chun Liu,<br>Chung-Guei Huang,<br>Mei-Jen Hsiao, Po-Wei<br>Huang, Cheng-Ta<br>Yang, Cheng-Hsun<br>Chiu, Peng-Nien<br>Huang, Kuo-Ming Lee,<br>Guang-Wu Chen, Shin-<br>Ru Shih |
| hCoV-<br>19/Taiwan/CGMH-<br>CGU-86/2021 | EPI_ISL_5<br>160569 | - | Laboratory<br>Medicine | Department of<br>Laboratory<br>Medicine, Lin-<br>Kou Chang Gung<br>Memorial<br>Hospital,<br>Taoyuan,<br>Taiwan | Kuo-Chien Tsao, Yu-<br>Nong Gong, Shu-Li<br>Yang, Yi-Chun Liu,<br>Chung-Guei Huang,<br>Mei-Jen Hsiao, Po-Wei<br>Huang, Cheng-Ta<br>Yang, Cheng-Hsun<br>Chiu, Peng-Nien<br>Huang, Kuo-Ming Lee,<br>Guang-Wu Chen, Shin-<br>Ru Shih |
| hCoV-<br>19/Taiwan/CGMH-<br>CGU-85/2021 | EPI_ISL_5<br>160564 | - | Laboratory<br>Medicine | Department of<br>Laboratory<br>Medicine, Lin-<br>Kou Chang Gung<br>Memorial<br>Hospital,<br>Taoyuan,<br>Taiwan | Kuo-Chien Tsao, Yu-<br>Nong Gong, Shu-Li<br>Yang, Yi-Chun Liu,<br>Chung-Guei Huang,<br>Mei-Jen Hsiao, Po-Wei<br>Huang, Cheng-Ta<br>Yang, Cheng-Hsun<br>Chiu, Peng-Nien<br>Huang, Kuo-Ming Lee,<br>Guang-Wu Chen, Shin-<br>Ru Shih |
| hCoV-<br>19/Taiwan/CGMH-<br>CGU-84/2021 | EPI_ISL_5<br>160563 | - | Laboratory<br>Medicine | Department of<br>Laboratory<br>Medicine, Lin-<br>Kou Chang Gung<br>Memorial<br>Hospital,<br>Taoyuan,<br>Taiwan | Kuo-Chien Tsao, Yu-<br>Nong Gong, Shu-Li<br>Yang, Yi-Chun Liu,<br>Chung-Guei Huang,<br>Mei-Jen Hsiao, Po-Wei<br>Huang, Cheng-Ta<br>Yang, Cheng-Hsun<br>Chiu, Peng-Nien<br>Huang, Kuo-Ming Lee,<br>Guang-Wu Chen, Shin-<br>Ru Shih |
| hCoV-<br>19/Taiwan/CGMH-<br>CGU-83/2021 | EPI_ISL_5<br>160559 | - | Laboratory<br>Medicine | Department of<br>Laboratory<br>Medicine, Lin-<br>Kou Chang Gung<br>Memorial                                    | Kuo-Chien Tsao, Yu-<br>Nong Gong, Shu-Li<br>Yang, Yi-Chun Liu,<br>Chung-Guei Huang,<br>Mei-Jen Hsiao, Po-Wei                                                                                                                      |

|                                         |                     |   |                             |                                                                                                                |                                                                                                                                                                                                                                   |
|-----------------------------------------|---------------------|---|-----------------------------|----------------------------------------------------------------------------------------------------------------|-----------------------------------------------------------------------------------------------------------------------------------------------------------------------------------------------------------------------------------|
|                                         |                     |   |                             | Hospital,<br>Taoyuan,<br>Taiwan                                                                                | Huang, Cheng-Ta<br>Yang, Cheng-Hsun<br>Chiu, Peng-Nien<br>Huang, Kuo-Ming Lee,<br>Guang-Wu Chen, Shin-<br>Ru Shih                                                                                                                 |
| hCoV-<br>19/Taiwan/CGMH-<br>CGU-82/2021 | EPI_ISL_5<br>160556 | - | Laboratory<br>Medicine      | Department of<br>Laboratory<br>Medicine, Lin-<br>Kou Chang Gung<br>Memorial<br>Hospital,<br>Taoyuan,<br>Taiwan | Kuo-Chien Tsao, Yu-<br>Nong Gong, Shu-Li<br>Yang, Yi-Chun Liu,<br>Chung-Guei Huang,<br>Mei-Jen Hsiao, Po-Wei<br>Huang, Cheng-Ta<br>Yang, Cheng-Hsun<br>Chiu, Peng-Nien<br>Huang, Kuo-Ming Lee,<br>Guang-Wu Chen, Shin-<br>Ru Shih |
| hCoV-<br>19/Taiwan/CGMH-<br>CGU-81/2021 | EPI_ISL_5<br>160551 | - | Laboratory<br>Medicine      | Department of<br>Laboratory<br>Medicine, Lin-<br>Kou Chang Gung<br>Memorial<br>Hospital,<br>Taoyuan,<br>Taiwan | Kuo-Chien Tsao, Yu-<br>Nong Gong, Shu-Li<br>Yang, Yi-Chun Liu,<br>Chung-Guei Huang,<br>Mei-Jen Hsiao, Po-Wei<br>Huang, Cheng-Ta<br>Yang, Cheng-Hsun<br>Chiu, Peng-Nien<br>Huang, Kuo-Ming Lee,<br>Guang-Wu Chen, Shin-<br>Ru Shih |
| hCoV-<br>19/Taiwan/CGMH-<br>CGU-80/2021 | EPI_ISL_5<br>160476 | - | Laboratory<br>Medicine      | Department of<br>Laboratory<br>Medicine, Lin-<br>Kou Chang Gung<br>Memorial<br>Hospital,<br>Taoyuan,<br>Taiwan | Kuo-Chien Tsao, Yu-<br>Nong Gong, Shu-Li<br>Yang, Yi-Chun Liu,<br>Chung-Guei Huang,<br>Mei-Jen Hsiao, Po-Wei<br>Huang, Cheng-Ta<br>Yang, Cheng-Hsun<br>Chiu, Peng-Nien<br>Huang, Kuo-Ming Lee,<br>Guang-Wu Chen, Shin-<br>Ru Shih |
| hCoV-<br>19/Taiwan/CGMH-<br>CGU-79/2021 | EPI_ISL_5<br>160472 | - | Laboratory<br>Medicine      | Department of<br>Laboratory<br>Medicine, Lin-<br>Kou Chang Gung<br>Memorial<br>Hospital,<br>Taoyuan,<br>Taiwan | Kuo-Chien Tsao, Yu-<br>Nong Gong, Shu-Li<br>Yang, Yi-Chun Liu,<br>Chung-Guei Huang,<br>Mei-Jen Hsiao, Po-Wei<br>Huang, Cheng-Ta<br>Yang, Cheng-Hsun<br>Chiu, Peng-Nien<br>Huang, Kuo-Ming Lee,<br>Guang-Wu Chen, Shin-<br>Ru Shih |
| hCoV-<br>19/Taiwan/CGMH-                | EPI_ISL_2<br>544714 | - | Research-<br>center-<br>for | Research-<br>center-<br>for                                                                                    | Shin-Ru Shih, Yu-Nong<br>Gong, Kuo-Ming Lee,                                                                                                                                                                                      |

|                                 |                    |  |                                                                                                    |                                                                                                    |                                                                                                                                                                                                                        |
|---------------------------------|--------------------|--|----------------------------------------------------------------------------------------------------|----------------------------------------------------------------------------------------------------|------------------------------------------------------------------------------------------------------------------------------------------------------------------------------------------------------------------------|
| CGU-78/2021                     |                    |  | Emerging Viral Infections, Chang Gung University, Taiwan                                           | Emerging Viral Infections, Chang Gung University, Taiwan                                           | Tsu-Lan Wu, Chung-Guei Huang, Shu-Li Yang, Po-Wei Huang, Hsiao-Chen Tu, Yung-Feng Lin, Hui-Ying Weng, Hung-Yu Shu, Shih-Feng Tsai, Jason Su, Carol Wang, Pocky Lai, Jora Lin                                           |
| hCoV-19/Taiwan/CGMH-CGU-77/2021 | EPI_ISL_2 - 544713 |  | Research- <sup>+</sup> , <sup>+</sup> for Emerging Viral Infections, Chang Gung University, Taiwan | Research- <sup>+</sup> , <sup>+</sup> for Emerging Viral Infections, Chang Gung University, Taiwan | Shin-Ru Shih, Yu-Nong Gong, Kuo-Ming Lee, Tsu-Lan Wu, Chung-Guei Huang, Shu-Li Yang, Po-Wei Huang, Hsiao-Chen Tu, Yung-Feng Lin, Hui-Ying Weng, Hung-Yu Shu, Shih-Feng Tsai, Jason Su, Carol Wang, Pocky Lai, Jora Lin |
| hCoV-19/Taiwan/CGMH-CGU-76/2021 | EPI_ISL_2 - 544712 |  | Research- <sup>+</sup> , <sup>+</sup> for Emerging Viral Infections, Chang Gung University, Taiwan | Research- <sup>+</sup> , <sup>+</sup> for Emerging Viral Infections, Chang Gung University, Taiwan | Shin-Ru Shih, Yu-Nong Gong, Kuo-Ming Lee, Tsu-Lan Wu, Chung-Guei Huang, Shu-Li Yang, Po-Wei Huang, Hsiao-Chen Tu, Yung-Feng Lin, Hui-Ying Weng, Hung-Yu Shu, Shih-Feng Tsai, Jason Su, Carol Wang, Pocky Lai, Jora Lin |
| hCoV-19/Taiwan/CGMH-CGU-75/2021 | EPI_ISL_2 - 544711 |  | Research- <sup>+</sup> , <sup>+</sup> for Emerging Viral Infections, Chang Gung University, Taiwan | Research- <sup>+</sup> , <sup>+</sup> for Emerging Viral Infections, Chang Gung University, Taiwan | Shin-Ru Shih, Yu-Nong Gong, Kuo-Ming Lee, Tsu-Lan Wu, Chung-Guei Huang, Shu-Li Yang, Po-Wei Huang, Hsiao-Chen Tu, Yung-Feng Lin, Hui-Ying Weng, Hung-Yu Shu, Shih-Feng Tsai, Jason Su, Carol Wang, Pocky Lai, Jora Lin |
| hCoV-19/Taiwan/CGMH-CGU-74/2021 | EPI_ISL_2 - 544710 |  | Research- <sup>+</sup> , <sup>+</sup> for Emerging Viral Infections, Chang Gung University, Taiwan | Research- <sup>+</sup> , <sup>+</sup> for Emerging Viral Infections, Chang Gung University, Taiwan | Shin-Ru Shih, Yu-Nong Gong, Kuo-Ming Lee, Tsu-Lan Wu, Chung-Guei Huang, Shu-Li Yang, Po-Wei Huang, Hsiao-Chen Tu, Yung-Feng Lin, Hui-Ying Weng, Hung-Yu Shu, Shih-Feng Tsai, Jason Su, Carol Wang, Pocky Lai, Jora Lin |

|                                 |                     |   |                                                                                                                                                               |                                                                                                                                                               | Lai, Jora Lin                                                                                                                                                                                                                                          |
|---------------------------------|---------------------|---|---------------------------------------------------------------------------------------------------------------------------------------------------------------|---------------------------------------------------------------------------------------------------------------------------------------------------------------|--------------------------------------------------------------------------------------------------------------------------------------------------------------------------------------------------------------------------------------------------------|
| hCoV-19/Taiwan/CGMH-CGU-73/2021 | EPI_ISL_2<br>544709 | - | Research- <sup>+</sup> , <sup>+</sup> Ä+C<br>enter- <sup>+</sup> , <sup>+</sup> Ä+for<br>Emerging Viral<br>Infections,<br>Chang Gung<br>University,<br>Taiwan | Research- <sup>+</sup> , <sup>+</sup> Ä+C<br>enter- <sup>+</sup> , <sup>+</sup> Ä+for<br>Emerging Viral<br>Infections,<br>Chang Gung<br>University,<br>Taiwan | Shin-Ru Shih, Yu-Nong<br>Gong, Kuo-Ming Lee,<br>Tsu-Lan Wu, Chung-<br>Guei Huang, Shu-Li<br>Yang, Po-Wei Huang,<br>Hsiao-Chen Tu, Yung-<br>Feng Lin, Hui-Ying<br>Weng, Hung-Yu Shu,<br>Shih-Feng Tsai, Jason<br>Su, Carol Wang, Pocky<br>Lai, Jora Lin |
| hCoV-19/Taiwan/CGMH-CGU-72/2021 | EPI_ISL_2<br>544708 | - | Research- <sup>+</sup> , <sup>+</sup> Ä+C<br>enter- <sup>+</sup> , <sup>+</sup> Ä+for<br>Emerging Viral<br>Infections,<br>Chang Gung<br>University,<br>Taiwan | Research- <sup>+</sup> , <sup>+</sup> Ä+C<br>enter- <sup>+</sup> , <sup>+</sup> Ä+for<br>Emerging Viral<br>Infections,<br>Chang Gung<br>University,<br>Taiwan | Shin-Ru Shih, Yu-Nong<br>Gong, Kuo-Ming Lee,<br>Tsu-Lan Wu, Chung-<br>Guei Huang, Shu-Li<br>Yang, Po-Wei Huang,<br>Hsiao-Chen Tu, Yung-<br>Feng Lin, Hui-Ying<br>Weng, Hung-Yu Shu,<br>Shih-Feng Tsai, Jason<br>Su, Carol Wang, Pocky<br>Lai, Jora Lin |
| hCoV-19/Taiwan/CGMH-CGU-71/2021 | EPI_ISL_2<br>544707 | - | Research- <sup>+</sup> , <sup>+</sup> Ä+C<br>enter- <sup>+</sup> , <sup>+</sup> Ä+for<br>Emerging Viral<br>Infections,<br>Chang Gung<br>University,<br>Taiwan | Research- <sup>+</sup> , <sup>+</sup> Ä+C<br>enter- <sup>+</sup> , <sup>+</sup> Ä+for<br>Emerging Viral<br>Infections,<br>Chang Gung<br>University,<br>Taiwan | Shin-Ru Shih, Yu-Nong<br>Gong, Kuo-Ming Lee,<br>Tsu-Lan Wu, Chung-<br>Guei Huang, Shu-Li<br>Yang, Po-Wei Huang,<br>Hsiao-Chen Tu, Yung-<br>Feng Lin, Hui-Ying<br>Weng, Hung-Yu Shu,<br>Shih-Feng Tsai, Jason<br>Su, Carol Wang, Pocky<br>Lai, Jora Lin |
| hCoV-19/Taiwan/CGMH-CGU-70/2021 | EPI_ISL_2<br>544706 | - | Research- <sup>+</sup> , <sup>+</sup> Ä+C<br>enter- <sup>+</sup> , <sup>+</sup> Ä+for<br>Emerging Viral<br>Infections,<br>Chang Gung<br>University,<br>Taiwan | Research- <sup>+</sup> , <sup>+</sup> Ä+C<br>enter- <sup>+</sup> , <sup>+</sup> Ä+for<br>Emerging Viral<br>Infections,<br>Chang Gung<br>University,<br>Taiwan | Shin-Ru Shih, Yu-Nong<br>Gong, Kuo-Ming Lee,<br>Tsu-Lan Wu, Chung-<br>Guei Huang, Shu-Li<br>Yang, Po-Wei Huang,<br>Hsiao-Chen Tu, Yung-<br>Feng Lin, Hui-Ying<br>Weng, Hung-Yu Shu,<br>Shih-Feng Tsai, Jason<br>Su, Carol Wang, Pocky<br>Lai, Jora Lin |
| hCoV-19/Taiwan/CGMH-CGU-69/2021 | EPI_ISL_2<br>544705 | - | Research- <sup>+</sup> , <sup>+</sup> Ä+C<br>enter- <sup>+</sup> , <sup>+</sup> Ä+for<br>Emerging Viral<br>Infections,<br>Chang Gung<br>University,<br>Taiwan | Research- <sup>+</sup> , <sup>+</sup> Ä+C<br>enter- <sup>+</sup> , <sup>+</sup> Ä+for<br>Emerging Viral<br>Infections,<br>Chang Gung<br>University,<br>Taiwan | Shin-Ru Shih, Yu-Nong<br>Gong, Kuo-Ming Lee,<br>Tsu-Lan Wu, Chung-<br>Guei Huang, Shu-Li<br>Yang, Po-Wei Huang,<br>Hsiao-Chen Tu, Yung-<br>Feng Lin, Hui-Ying                                                                                          |

|                                 |                  |   |                                                                                                                                             |                                                                                                                                                                                                                                                                                                                                                                       |
|---------------------------------|------------------|---|---------------------------------------------------------------------------------------------------------------------------------------------|-----------------------------------------------------------------------------------------------------------------------------------------------------------------------------------------------------------------------------------------------------------------------------------------------------------------------------------------------------------------------|
|                                 |                  |   |                                                                                                                                             | Weng, Hung-Yu Shu, Shih-Feng Tsai, Jason Su, Carol Wang, Pocky Lai, Jora Lin                                                                                                                                                                                                                                                                                          |
| hCoV-19/Taiwan/CGMH-CGU-68/2021 | EPI_ISL_2 544704 | - | Research- <sup>+</sup> , <sup>+</sup> Ä+C enter- <sup>+</sup> , <sup>+</sup> Ä+for Emerging Viral Infections, Chang Gung University, Taiwan | Research- <sup>+</sup> , <sup>+</sup> Ä+C enter- <sup>+</sup> , <sup>+</sup> Ä+for Emerging Viral Infections, Chang Gung University, Taiwan<br>Shin-Ru Shih, Yu-Nong Gong, Kuo-Ming Lee, Tsu-Lan Wu, Chung-Guei Huang, Shu-Li Yang, Po-Wei Huang, Hsiao-Chen Tu, Yung-Feng Lin, Hui-Ying Weng, Hung-Yu Shu, Shih-Feng Tsai, Jason Su, Carol Wang, Pocky Lai, Jora Lin |
| hCoV-19/Taiwan/CGMH-CGU-67/2021 | EPI_ISL_2 544703 | - | Research- <sup>+</sup> , <sup>+</sup> Ä+C enter- <sup>+</sup> , <sup>+</sup> Ä+for Emerging Viral Infections, Chang Gung University, Taiwan | Research- <sup>+</sup> , <sup>+</sup> Ä+C enter- <sup>+</sup> , <sup>+</sup> Ä+for Emerging Viral Infections, Chang Gung University, Taiwan<br>Shin-Ru Shih, Yu-Nong Gong, Kuo-Ming Lee, Tsu-Lan Wu, Chung-Guei Huang, Shu-Li Yang, Po-Wei Huang, Hsiao-Chen Tu, Yung-Feng Lin, Hui-Ying Weng, Hung-Yu Shu, Shih-Feng Tsai, Jason Su, Carol Wang, Pocky Lai, Jora Lin |
| hCoV-19/Taiwan/CGMH-CGU-66/2021 | EPI_ISL_2 544702 | - | Research- <sup>+</sup> , <sup>+</sup> Ä+C enter- <sup>+</sup> , <sup>+</sup> Ä+for Emerging Viral Infections, Chang Gung University, Taiwan | Research- <sup>+</sup> , <sup>+</sup> Ä+C enter- <sup>+</sup> , <sup>+</sup> Ä+for Emerging Viral Infections, Chang Gung University, Taiwan<br>Shin-Ru Shih, Yu-Nong Gong, Kuo-Ming Lee, Tsu-Lan Wu, Chung-Guei Huang, Shu-Li Yang, Po-Wei Huang, Hsiao-Chen Tu, Yung-Feng Lin, Hui-Ying Weng, Hung-Yu Shu, Shih-Feng Tsai, Jason Su, Carol Wang, Pocky Lai, Jora Lin |
| hCoV-19/Taiwan/CGMH-CGU-65/2021 | EPI_ISL_2 544701 | - | Research- <sup>+</sup> , <sup>+</sup> Ä+C enter- <sup>+</sup> , <sup>+</sup> Ä+for Emerging Viral Infections, Chang Gung University, Taiwan | Research- <sup>+</sup> , <sup>+</sup> Ä+C enter- <sup>+</sup> , <sup>+</sup> Ä+for Emerging Viral Infections, Chang Gung University, Taiwan<br>Shin-Ru Shih, Yu-Nong Gong, Kuo-Ming Lee, Tsu-Lan Wu, Chung-Guei Huang, Shu-Li Yang, Po-Wei Huang, Hsiao-Chen Tu, Yung-Feng Lin, Hui-Ying Weng, Hung-Yu Shu, Shih-Feng Tsai, Jason Su, Carol Wang, Pocky Lai, Jora Lin |
| hCoV-19/Taiwan/CGMH-CGU-64/2021 | EPI_ISL_2 544700 | - | Research- <sup>+</sup> , <sup>+</sup> Ä+C enter- <sup>+</sup> , <sup>+</sup> Ä+for Emerging Viral Infections,                               | Research- <sup>+</sup> , <sup>+</sup> Ä+C enter- <sup>+</sup> , <sup>+</sup> Ä+for Emerging Viral Infections,<br>Shin-Ru Shih, Yu-Nong Gong, Kuo-Ming Lee, Tsu-Lan Wu, Chung-Guei Huang, Shu-Li                                                                                                                                                                       |



|                                 |                  |   |                               |                                                                                          |                                                                                                                                                                                                   |
|---------------------------------|------------------|---|-------------------------------|------------------------------------------------------------------------------------------|---------------------------------------------------------------------------------------------------------------------------------------------------------------------------------------------------|
|                                 |                  |   | Chang Gung University, Taiwan | Chang Gung University, Taiwan                                                            | Yang, Po-Wei Huang, Hsiao-Chen Tu, Yung-Feng Lin, Hui-Ying Weng, Hung-Yu Shu, Shih-Feng Tsai, Jason Su, Carol Wang, Pocky Lai, Jora Lin                                                           |
| hCoV-19/Taiwan/CGMH-CGU-63/2021 | EPI_ISL_2 250184 | - | Laboratory Medicine           | Department of Laboratory Medicine, Lin-Kou Chang Gung Memorial Hospital, Taoyuan, Taiwan | Kuo-Chien Tsao, Yu-Nong Gong, Shu-Li Yang, Yi-Chun Liu, Chung-Guei Huang, Mei-Jen Hsiao, Po-Wei Huang, Cheng-Ta Yang, Cheng-Hsun Chiu, Peng-Nien Huang, Kuo-Ming Lee, Guang-Wu Chen, Shin-Ru Shih |
| hCoV-19/Taiwan/CGMH-CGU-62/2021 | EPI_ISL_2 250152 | - | Laboratory Medicine           | Department of Laboratory Medicine, Lin-Kou Chang Gung Memorial Hospital, Taoyuan, Taiwan | Kuo-Chien Tsao, Yu-Nong Gong, Shu-Li Yang, Yi-Chun Liu, Chung-Guei Huang, Mei-Jen Hsiao, Po-Wei Huang, Cheng-Ta Yang, Cheng-Hsun Chiu, Peng-Nien Huang, Kuo-Ming Lee, Guang-Wu Chen, Shin-Ru Shih |
| hCoV-19/Taiwan/CGMH-CGU-61/2021 | EPI_ISL_2 250151 | - | Laboratory Medicine           | Department of Laboratory Medicine, Lin-Kou Chang Gung Memorial Hospital, Taoyuan, Taiwan | Kuo-Chien Tsao, Yu-Nong Gong, Shu-Li Yang, Yi-Chun Liu, Chung-Guei Huang, Mei-Jen Hsiao, Po-Wei Huang, Cheng-Ta Yang, Cheng-Hsun Chiu, Peng-Nien Huang, Kuo-Ming Lee, Guang-Wu Chen, Shin-Ru Shih |
| hCoV-19/Taiwan/CGMH-CGU-60/2021 | EPI_ISL_2 249836 | - | Laboratory Medicine           | Department of Laboratory Medicine, Lin-Kou Chang Gung Memorial Hospital, Taoyuan, Taiwan | Kuo-Chien Tsao, Yu-Nong Gong, Shu-Li Yang, Yi-Chun Liu, Chung-Guei Huang, Mei-Jen Hsiao, Po-Wei Huang, Cheng-Ta Yang, Cheng-Hsun Chiu, Peng-Nien Huang, Kuo-Ming Lee, Guang-Wu Chen, Shin-Ru Shih |
| hCoV-                           | EPI_ISL_2        | - | Laboratory                    | Department of                                                                            | Kuo-Chien Tsao, Yu-                                                                                                                                                                               |

|                                         |                     |   |                        |                                                                                                                |                                                                                                                                                                                                                                   |
|-----------------------------------------|---------------------|---|------------------------|----------------------------------------------------------------------------------------------------------------|-----------------------------------------------------------------------------------------------------------------------------------------------------------------------------------------------------------------------------------|
| 19/Taiwan/CGMH-<br>CGU-59/2021          | 249653              |   | Medicine               | Laboratory<br>Medicine, Lin-<br>Kou Chang Gung<br>Memorial<br>Hospital,<br>Taoyuan,<br>Taiwan                  | Nong Gong, Shu-Li<br>Yang, Yi-Chun Liu,<br>Chung-Guei Huang,<br>Mei-Jen Hsiao, Po-Wei<br>Huang, Cheng-Ta<br>Yang, Cheng-Hsun<br>Chiu, Peng-Nien<br>Huang, Kuo-Ming Lee,<br>Guang-Wu Chen, Shin-<br>Ru Shih                        |
| hCoV-<br>19/Taiwan/CGMH-<br>CGU-58/2021 | EPI_ISL_2<br>249597 | - | Laboratory<br>Medicine | Department of<br>Laboratory<br>Medicine, Lin-<br>Kou Chang Gung<br>Memorial<br>Hospital,<br>Taoyuan,<br>Taiwan | Kuo-Chien Tsao, Yu-<br>Nong Gong, Shu-Li<br>Yang, Yi-Chun Liu,<br>Chung-Guei Huang,<br>Mei-Jen Hsiao, Po-Wei<br>Huang, Cheng-Ta<br>Yang, Cheng-Hsun<br>Chiu, Peng-Nien<br>Huang, Kuo-Ming Lee,<br>Guang-Wu Chen, Shin-<br>Ru Shih |
| hCoV-<br>19/Taiwan/CGMH-<br>CGU-57/2021 | EPI_ISL_2<br>249517 | - | Laboratory<br>Medicine | Department of<br>Laboratory<br>Medicine, Lin-<br>Kou Chang Gung<br>Memorial<br>Hospital,<br>Taoyuan,<br>Taiwan | Kuo-Chien Tsao, Yu-<br>Nong Gong, Shu-Li<br>Yang, Yi-Chun Liu,<br>Chung-Guei Huang,<br>Mei-Jen Hsiao, Po-Wei<br>Huang, Cheng-Ta<br>Yang, Cheng-Hsun<br>Chiu, Peng-Nien<br>Huang, Kuo-Ming Lee,<br>Guang-Wu Chen, Shin-<br>Ru Shih |
| hCoV-<br>19/Taiwan/CGMH-<br>CGU-56/2021 | EPI_ISL_2<br>249516 | - | Laboratory<br>Medicine | Department of<br>Laboratory<br>Medicine, Lin-<br>Kou Chang Gung<br>Memorial<br>Hospital,<br>Taoyuan,<br>Taiwan | Kuo-Chien Tsao, Yu-<br>Nong Gong, Shu-Li<br>Yang, Yi-Chun Liu,<br>Chung-Guei Huang,<br>Mei-Jen Hsiao, Po-Wei<br>Huang, Cheng-Ta<br>Yang, Cheng-Hsun<br>Chiu, Peng-Nien<br>Huang, Kuo-Ming Lee,<br>Guang-Wu Chen, Shin-<br>Ru Shih |
| hCoV-<br>19/Taiwan/CGMH-<br>CGU-55/2021 | EPI_ISL_2<br>249515 | - | Laboratory<br>Medicine | Department of<br>Laboratory<br>Medicine, Lin-<br>Kou Chang Gung<br>Memorial<br>Hospital,<br>Taoyuan,<br>Taiwan | Kuo-Chien Tsao, Yu-<br>Nong Gong, Shu-Li<br>Yang, Yi-Chun Liu,<br>Chung-Guei Huang,<br>Mei-Jen Hsiao, Po-Wei<br>Huang, Cheng-Ta<br>Yang, Cheng-Hsun<br>Chiu, Peng-Nien<br>Huang, Kuo-Ming Lee,                                    |

|                                 |                     |   |                        |                                                                                                                |                                                                                                                                                                                                                                   |
|---------------------------------|---------------------|---|------------------------|----------------------------------------------------------------------------------------------------------------|-----------------------------------------------------------------------------------------------------------------------------------------------------------------------------------------------------------------------------------|
|                                 |                     |   |                        |                                                                                                                | Guang-Wu Chen, Shin-Ru Shih                                                                                                                                                                                                       |
| hCoV-19/Taiwan/CGMH-CGU-54/2021 | EPI_ISL_2<br>249500 | - | Laboratory<br>Medicine | Department of<br>Laboratory<br>Medicine, Lin-<br>Kou Chang Gung<br>Memorial<br>Hospital,<br>Taoyuan,<br>Taiwan | Kuo-Chien Tsao, Yu-<br>Nong Gong, Shu-Li<br>Yang, Yi-Chun Liu,<br>Chung-Guei Huang,<br>Mei-Jen Hsiao, Po-Wei<br>Huang, Cheng-Ta<br>Yang, Cheng-Hsun<br>Chiu, Peng-Nien<br>Huang, Kuo-Ming Lee,<br>Guang-Wu Chen, Shin-<br>Ru Shih |
| hCoV-19/Taiwan/CGMH-CGU-53/2021 | EPI_ISL_2<br>249499 | - | Laboratory<br>Medicine | Department of<br>Laboratory<br>Medicine, Lin-<br>Kou Chang Gung<br>Memorial<br>Hospital,<br>Taoyuan,<br>Taiwan | Kuo-Chien Tsao, Yu-<br>Nong Gong, Shu-Li<br>Yang, Yi-Chun Liu,<br>Chung-Guei Huang,<br>Mei-Jen Hsiao, Po-Wei<br>Huang, Cheng-Ta<br>Yang, Cheng-Hsun<br>Chiu, Peng-Nien<br>Huang, Kuo-Ming Lee,<br>Guang-Wu Chen, Shin-<br>Ru Shih |
| hCoV-19/Taiwan/CGMH-CGU-52/2021 | EPI_ISL_2<br>249473 | - | Laboratory<br>Medicine | Department of<br>Laboratory<br>Medicine, Lin-<br>Kou Chang Gung<br>Memorial<br>Hospital,<br>Taoyuan,<br>Taiwan | Kuo-Chien Tsao, Yu-<br>Nong Gong, Shu-Li<br>Yang, Yi-Chun Liu,<br>Chung-Guei Huang,<br>Mei-Jen Hsiao, Po-Wei<br>Huang, Cheng-Ta<br>Yang, Cheng-Hsun<br>Chiu, Peng-Nien<br>Huang, Kuo-Ming Lee,<br>Guang-Wu Chen, Shin-<br>Ru Shih |
| hCoV-19/Taiwan/CGMH-CGU-51/2020 | EPI_ISL_2<br>249472 | - | Laboratory<br>Medicine | Department of<br>Laboratory<br>Medicine, Lin-<br>Kou Chang Gung<br>Memorial<br>Hospital,<br>Taoyuan,<br>Taiwan | Kuo-Chien Tsao, Yu-<br>Nong Gong, Shu-Li<br>Yang, Yi-Chun Liu,<br>Chung-Guei Huang,<br>Mei-Jen Hsiao, Po-Wei<br>Huang, Cheng-Ta<br>Yang, Cheng-Hsun<br>Chiu, Peng-Nien<br>Huang, Kuo-Ming Lee,<br>Guang-Wu Chen, Shin-<br>Ru Shih |
| hCoV-19/Taiwan/CGMH-CGU-50/2021 | EPI_ISL_9<br>56331  | - | Laboratory<br>Medicine | Department of<br>Laboratory<br>Medicine, Lin-<br>Kou Chang Gung<br>Memorial<br>Hospital,                       | Kuo-Chien Tsao, Yu-<br>Nong Gong, Shu-Li<br>Yang, Yi-Chun Liu,<br>Chung-Guei Huang,<br>Mei-Jen Hsiao, Po-Wei<br>Huang, Cheng-Ta                                                                                                   |

|                                         |                    |   |                        |                                                                                                                |                                                                                                                                                                                                                                   |
|-----------------------------------------|--------------------|---|------------------------|----------------------------------------------------------------------------------------------------------------|-----------------------------------------------------------------------------------------------------------------------------------------------------------------------------------------------------------------------------------|
|                                         |                    |   |                        | Taoyuan,<br>Taiwan                                                                                             | Yang, Cheng-Hsun<br>Chiu, Peng-Nien<br>Huang, Kuo-Ming Lee,<br>Guang-Wu Chen, Shin-<br>Ru Shih                                                                                                                                    |
| hCoV-<br>19/Taiwan/CGMH-<br>CGU-49/2021 | EPI_ISL_9<br>56330 | - | Laboratory<br>Medicine | Department of<br>Laboratory<br>Medicine, Lin-<br>Kou Chang Gung<br>Memorial<br>Hospital,<br>Taoyuan,<br>Taiwan | Kuo-Chien Tsao, Yu-<br>Nong Gong, Shu-Li<br>Yang, Yi-Chun Liu,<br>Chung-Guei Huang,<br>Mei-Jen Hsiao, Po-Wei<br>Huang, Cheng-Ta<br>Yang, Cheng-Hsun<br>Chiu, Peng-Nien<br>Huang, Kuo-Ming Lee,<br>Guang-Wu Chen, Shin-<br>Ru Shih |
| hCoV-<br>19/Taiwan/CGMH-<br>CGU-48/2021 | EPI_ISL_9<br>56329 | - | Laboratory<br>Medicine | Department of<br>Laboratory<br>Medicine, Lin-<br>Kou Chang Gung<br>Memorial<br>Hospital,<br>Taoyuan,<br>Taiwan | Kuo-Chien Tsao, Yu-<br>Nong Gong, Shu-Li<br>Yang, Yi-Chun Liu,<br>Chung-Guei Huang,<br>Mei-Jen Hsiao, Po-Wei<br>Huang, Cheng-Ta<br>Yang, Cheng-Hsun<br>Chiu, Peng-Nien<br>Huang, Kuo-Ming Lee,<br>Guang-Wu Chen, Shin-<br>Ru Shih |
| hCoV-<br>19/Taiwan/CGMH-<br>CGU-47/2021 | EPI_ISL_9<br>56328 | - | Laboratory<br>Medicine | Department of<br>Laboratory<br>Medicine, Lin-<br>Kou Chang Gung<br>Memorial<br>Hospital,<br>Taoyuan,<br>Taiwan | Kuo-Chien Tsao, Yu-<br>Nong Gong, Shu-Li<br>Yang, Yi-Chun Liu,<br>Chung-Guei Huang,<br>Mei-Jen Hsiao, Po-Wei<br>Huang, Cheng-Ta<br>Yang, Cheng-Hsun<br>Chiu, Peng-Nien<br>Huang, Kuo-Ming Lee,<br>Guang-Wu Chen, Shin-<br>Ru Shih |
| hCoV-<br>19/Taiwan/CGMH-<br>CGU-46/2021 | EPI_ISL_9<br>56327 | - | Laboratory<br>Medicine | Department of<br>Laboratory<br>Medicine, Lin-<br>Kou Chang Gung<br>Memorial<br>Hospital,<br>Taoyuan,<br>Taiwan | Kuo-Chien Tsao, Yu-<br>Nong Gong, Shu-Li<br>Yang, Yi-Chun Liu,<br>Chung-Guei Huang,<br>Mei-Jen Hsiao, Po-Wei<br>Huang, Cheng-Ta<br>Yang, Cheng-Hsun<br>Chiu, Peng-Nien<br>Huang, Kuo-Ming Lee,<br>Guang-Wu Chen, Shin-<br>Ru Shih |
| hCoV-<br>19/Taiwan/CGMH-<br>CGU-45/2020 | EPI_ISL_9<br>56326 | - | Laboratory<br>Medicine | Department of<br>Laboratory<br>Medicine, Lin-                                                                  | Kuo-Chien Tsao, Yu-<br>Nong Gong, Shu-Li<br>Yang, Yi-Chun Liu,                                                                                                                                                                    |

|                                 |                |   |                     |                                                                                          |                                                                                                                                                                                                   |
|---------------------------------|----------------|---|---------------------|------------------------------------------------------------------------------------------|---------------------------------------------------------------------------------------------------------------------------------------------------------------------------------------------------|
|                                 |                |   |                     | Kou Chang Gung Memorial Hospital, Taoyuan, Taiwan                                        | Chung-Guei Huang, Mei-Jen Hsiao, Po-Wei Huang, Cheng-Ta Yang, Cheng-Hsun Chiu, Peng-Nien Huang, Kuo-Ming Lee, Guang-Wu Chen, Shin-Ru Shih                                                         |
| hCoV-19/Taiwan/CGMH-CGU-44/2020 | EPI_ISL_956325 | - | Laboratory Medicine | Department of Laboratory Medicine, Lin-Kou Chang Gung Memorial Hospital, Taoyuan, Taiwan | Kuo-Chien Tsao, Yu-Nong Gong, Shu-Li Yang, Yi-Chun Liu, Chung-Guei Huang, Mei-Jen Hsiao, Po-Wei Huang, Cheng-Ta Yang, Cheng-Hsun Chiu, Peng-Nien Huang, Kuo-Ming Lee, Guang-Wu Chen, Shin-Ru Shih |
| hCoV-19/Taiwan/CGMH-CGU-43/2020 | EPI_ISL_956324 | - | Laboratory Medicine | Department of Laboratory Medicine, Lin-Kou Chang Gung Memorial Hospital, Taoyuan, Taiwan | Kuo-Chien Tsao, Yu-Nong Gong, Shu-Li Yang, Yi-Chun Liu, Chung-Guei Huang, Mei-Jen Hsiao, Po-Wei Huang, Cheng-Ta Yang, Cheng-Hsun Chiu, Peng-Nien Huang, Kuo-Ming Lee, Guang-Wu Chen, Shin-Ru Shih |
| hCoV-19/Taiwan/CGMH-CGU-42/2020 | EPI_ISL_956323 | - | Laboratory Medicine | Department of Laboratory Medicine, Lin-Kou Chang Gung Memorial Hospital, Taoyuan, Taiwan | Kuo-Chien Tsao, Yu-Nong Gong, Shu-Li Yang, Yi-Chun Liu, Chung-Guei Huang, Mei-Jen Hsiao, Po-Wei Huang, Cheng-Ta Yang, Cheng-Hsun Chiu, Peng-Nien Huang, Kuo-Ming Lee, Guang-Wu Chen, Shin-Ru Shih |
| hCoV-19/Taiwan/CGMH-CGU-41/2020 | EPI_ISL_956322 | - | Laboratory Medicine | Department of Laboratory Medicine, Lin-Kou Chang Gung Memorial Hospital, Taoyuan, Taiwan | Kuo-Chien Tsao, Yu-Nong Gong, Shu-Li Yang, Yi-Chun Liu, Chung-Guei Huang, Mei-Jen Hsiao, Po-Wei Huang, Cheng-Ta Yang, Cheng-Hsun Chiu, Peng-Nien Huang, Kuo-Ming Lee, Guang-Wu Chen, Shin-Ru Shih |

|                                 |                    |   |                        |                                                                                                                |                                                                                                                                                                                                                                   |
|---------------------------------|--------------------|---|------------------------|----------------------------------------------------------------------------------------------------------------|-----------------------------------------------------------------------------------------------------------------------------------------------------------------------------------------------------------------------------------|
| hCoV-19/Taiwan/CGMH-CGU-40/2020 | EPI_ISL_9<br>56321 | - | Laboratory<br>Medicine | Department of<br>Laboratory<br>Medicine, Lin-<br>Kou Chang Gung<br>Memorial<br>Hospital,<br>Taoyuan,<br>Taiwan | Kuo-Chien Tsao, Yu-<br>Nong Gong, Shu-Li<br>Yang, Yi-Chun Liu,<br>Chung-Guei Huang,<br>Mei-Jen Hsiao, Po-Wei<br>Huang, Cheng-Ta<br>Yang, Cheng-Hsun<br>Chiu, Peng-Nien<br>Huang, Kuo-Ming Lee,<br>Guang-Wu Chen, Shin-<br>Ru Shih |
| hCoV-19/Taiwan/CGMH-CGU-39/2020 | EPI_ISL_9<br>56320 | - | Laboratory<br>Medicine | Department of<br>Laboratory<br>Medicine, Lin-<br>Kou Chang Gung<br>Memorial<br>Hospital,<br>Taoyuan,<br>Taiwan | Kuo-Chien Tsao, Yu-<br>Nong Gong, Shu-Li<br>Yang, Yi-Chun Liu,<br>Chung-Guei Huang,<br>Mei-Jen Hsiao, Po-Wei<br>Huang, Cheng-Ta<br>Yang, Cheng-Hsun<br>Chiu, Peng-Nien<br>Huang, Kuo-Ming Lee,<br>Guang-Wu Chen, Shin-<br>Ru Shih |
| hCoV-19/Taiwan/CGMH-CGU-38/2020 | EPI_ISL_9<br>56318 | - | Laboratory<br>Medicine | Department of<br>Laboratory<br>Medicine, Lin-<br>Kou Chang Gung<br>Memorial<br>Hospital,<br>Taoyuan,<br>Taiwan | Kuo-Chien Tsao, Yu-<br>Nong Gong, Shu-Li<br>Yang, Yi-Chun Liu,<br>Chung-Guei Huang,<br>Mei-Jen Hsiao, Po-Wei<br>Huang, Cheng-Ta<br>Yang, Cheng-Hsun<br>Chiu, Peng-Nien<br>Huang, Kuo-Ming Lee,<br>Guang-Wu Chen, Shin-<br>Ru Shih |
| hCoV-19/Taiwan/CGMH-CGU-37/2020 | EPI_ISL_9<br>56317 | - | Laboratory<br>Medicine | Department of<br>Laboratory<br>Medicine, Lin-<br>Kou Chang Gung<br>Memorial<br>Hospital,<br>Taoyuan,<br>Taiwan | Kuo-Chien Tsao, Yu-<br>Nong Gong, Shu-Li<br>Yang, Yi-Chun Liu,<br>Chung-Guei Huang,<br>Mei-Jen Hsiao, Po-Wei<br>Huang, Cheng-Ta<br>Yang, Cheng-Hsun<br>Chiu, Peng-Nien<br>Huang, Kuo-Ming Lee,<br>Guang-Wu Chen, Shin-<br>Ru Shih |
| hCoV-19/Taiwan/CGMH-CGU-36/2020 | EPI_ISL_6<br>67809 | - | Laboratory<br>Medicine | Department of<br>Laboratory<br>Medicine, Lin-<br>Kou Chang Gung<br>Memorial<br>Hospital,<br>Taoyuan,<br>Taiwan | Kuo-Chien Tsao, Yu-<br>Nong Gong, Shu-Li<br>Yang, Yi-Chun Liu,<br>Chung-Guei Huang,<br>Mei-Jen Hsiao, Po-Wei<br>Huang, Cheng-Ta<br>Yang, Cheng-Hsun<br>Chiu, Peng-Nien                                                            |

|                                         |                    |   |                        |                                                                                                                |                                                                                                                                                                                                                                   |
|-----------------------------------------|--------------------|---|------------------------|----------------------------------------------------------------------------------------------------------------|-----------------------------------------------------------------------------------------------------------------------------------------------------------------------------------------------------------------------------------|
|                                         |                    |   |                        |                                                                                                                | Huang, Kuo-Ming Lee,<br>Guang-Wu Chen, Shin-<br>Ru Shih                                                                                                                                                                           |
| hCoV-<br>19/Taiwan/CGMH-<br>CGU-35/2020 | EPI_ISL_6<br>67808 | - | Laboratory<br>Medicine | Department of<br>Laboratory<br>Medicine, Lin-<br>Kou Chang Gung<br>Memorial<br>Hospital,<br>Taoyuan,<br>Taiwan | Kuo-Chien Tsao, Yu-<br>Nong Gong, Shu-Li<br>Yang, Yi-Chun Liu,<br>Chung-Guei Huang,<br>Mei-Jen Hsiao, Po-Wei<br>Huang, Cheng-Ta<br>Yang, Cheng-Hsun<br>Chiu, Peng-Nien<br>Huang, Kuo-Ming Lee,<br>Guang-Wu Chen, Shin-<br>Ru Shih |
| hCoV-<br>19/Taiwan/CGMH-<br>CGU-34/2020 | EPI_ISL_6<br>67807 | - | Laboratory<br>Medicine | Department of<br>Laboratory<br>Medicine, Lin-<br>Kou Chang Gung<br>Memorial<br>Hospital,<br>Taoyuan,<br>Taiwan | Kuo-Chien Tsao, Yu-<br>Nong Gong, Shu-Li<br>Yang, Yi-Chun Liu,<br>Chung-Guei Huang,<br>Mei-Jen Hsiao, Po-Wei<br>Huang, Cheng-Ta<br>Yang, Cheng-Hsun<br>Chiu, Peng-Nien<br>Huang, Kuo-Ming Lee,<br>Guang-Wu Chen, Shin-<br>Ru Shih |
| hCoV-<br>19/Taiwan/CGMH-<br>CGU-33/2020 | EPI_ISL_6<br>60545 | - | Laboratory<br>Medicine | Department of<br>Laboratory<br>Medicine, Lin-<br>Kou Chang Gung<br>Memorial<br>Hospital,<br>Taoyuan,<br>Taiwan | Kuo-Chien Tsao, Yu-<br>Nong Gong, Shu-Li<br>Yang, Yi-Chun Liu,<br>Chung-Guei Huang,<br>Mei-Jen Hsiao, Po-Wei<br>Huang, Cheng-Ta<br>Yang, Cheng-Hsun<br>Chiu, Peng-Nien<br>Huang, Kuo-Ming Lee,<br>Guang-Wu Chen, Shin-<br>Ru Shih |
| hCoV-<br>19/Taiwan/CGMH-<br>CGU-32/2020 | EPI_ISL_6<br>60544 | - | Laboratory<br>Medicine | Department of<br>Laboratory<br>Medicine, Lin-<br>Kou Chang Gung<br>Memorial<br>Hospital,<br>Taoyuan,<br>Taiwan | Kuo-Chien Tsao, Yu-<br>Nong Gong, Shu-Li<br>Yang, Yi-Chun Liu,<br>Chung-Guei Huang,<br>Mei-Jen Hsiao, Po-Wei<br>Huang, Cheng-Ta<br>Yang, Cheng-Hsun<br>Chiu, Peng-Nien<br>Huang, Kuo-Ming Lee,<br>Guang-Wu Chen, Shin-<br>Ru Shih |
| hCoV-<br>19/Taiwan/CGMH-<br>CGU-31/2020 | EPI_ISL_6<br>60543 | - | Laboratory<br>Medicine | Department of<br>Laboratory<br>Medicine, Lin-<br>Kou Chang Gung<br>Memorial                                    | Kuo-Chien Tsao, Yu-<br>Nong Gong, Shu-Li<br>Yang, Yi-Chun Liu,<br>Chung-Guei Huang,<br>Mei-Jen Hsiao, Po-Wei                                                                                                                      |

|                                         |                    |   |                        |                                                                                                                |                                                                                                                                                                                                                                   |
|-----------------------------------------|--------------------|---|------------------------|----------------------------------------------------------------------------------------------------------------|-----------------------------------------------------------------------------------------------------------------------------------------------------------------------------------------------------------------------------------|
|                                         |                    |   |                        | Hospital,<br>Taoyuan,<br>Taiwan                                                                                | Huang, Cheng-Ta<br>Yang, Cheng-Hsun<br>Chiu, Peng-Nien<br>Huang, Kuo-Ming Lee,<br>Guang-Wu Chen, Shin-<br>Ru Shih                                                                                                                 |
| hCoV-<br>19/Taiwan/CGMH-<br>CGU-30/2020 | EPI_ISL_4<br>64094 | - | Laboratory<br>Medicine | Department of<br>Laboratory<br>Medicine, Lin-<br>Kou Chang Gung<br>Memorial<br>Hospital,<br>Taoyuan,<br>Taiwan | Kuo-Chien Tsao, Yu-<br>Nong Gong, Shu-Li<br>Yang, Yi-Chun Liu,<br>Chung-Guei Huang,<br>Mei-Jen Hsiao, Po-Wei<br>Huang, Cheng-Ta<br>Yang, Cheng-Hsun<br>Chiu, Peng-Nien<br>Huang, Kuo-Ming Lee,<br>Guang-Wu Chen, Shin-<br>Ru Shih |
| hCoV-<br>19/Taiwan/CGMH-<br>CGU-29/2020 | EPI_ISL_4<br>64093 | - | Laboratory<br>Medicine | Department of<br>Laboratory<br>Medicine, Lin-<br>Kou Chang Gung<br>Memorial<br>Hospital,<br>Taoyuan,<br>Taiwan | Kuo-Chien Tsao, Yu-<br>Nong Gong, Shu-Li<br>Yang, Yi-Chun Liu,<br>Chung-Guei Huang,<br>Mei-Jen Hsiao, Po-Wei<br>Huang, Cheng-Ta<br>Yang, Cheng-Hsun<br>Chiu, Peng-Nien<br>Huang, Kuo-Ming Lee,<br>Guang-Wu Chen, Shin-<br>Ru Shih |
| hCoV-<br>19/Taiwan/CGMH-<br>CGU-28/2020 | EPI_ISL_4<br>64092 | - | Laboratory<br>Medicine | Department of<br>Laboratory<br>Medicine, Lin-<br>Kou Chang Gung<br>Memorial<br>Hospital,<br>Taoyuan,<br>Taiwan | Kuo-Chien Tsao, Yu-<br>Nong Gong, Shu-Li<br>Yang, Yi-Chun Liu,<br>Chung-Guei Huang,<br>Mei-Jen Hsiao, Po-Wei<br>Huang, Cheng-Ta<br>Yang, Cheng-Hsun<br>Chiu, Peng-Nien<br>Huang, Kuo-Ming Lee,<br>Guang-Wu Chen, Shin-<br>Ru Shih |
| hCoV-<br>19/Taiwan/CGMH-<br>CGU-27/2020 | EPI_ISL_4<br>52179 | - | Laboratory<br>Medicine | Department of<br>Laboratory<br>Medicine, Lin-<br>Kou Chang Gung<br>Memorial<br>Hospital,<br>Taoyuan,<br>Taiwan | Kuo-Chien Tsao, Yu-<br>Nong Gong, Shu-Li<br>Yang, Yi-Chun Liu,<br>Chung-Guei Huang,<br>Mei-Jen Hsiao, Po-Wei<br>Huang, Cheng-Ta<br>Yang, Cheng-Hsun<br>Chiu, Peng-Nien<br>Huang, Kuo-Ming Lee,<br>Guang-Wu Chen, Shin-<br>Ru Shih |
| hCoV-<br>19/Taiwan/CGMH-                | EPI_ISL_4<br>52178 | - | Laboratory<br>Medicine | Department of<br>Laboratory                                                                                    | Kuo-Chien Tsao, Yu-<br>Nong Gong, Shu-Li                                                                                                                                                                                          |



|                                 |               |   |                                                                 |                                                                                                                                                                                                                                                                                               |
|---------------------------------|---------------|---|-----------------------------------------------------------------|-----------------------------------------------------------------------------------------------------------------------------------------------------------------------------------------------------------------------------------------------------------------------------------------------|
| CGU-26/2020                     |               |   | Medicine, Lin-Kou Chang Gung Memorial Hospital, Taoyuan, Taiwan | Yang, Yi-Chun Liu, Chung-Guei Huang, Mei-Jen Hsiao, Po-Wei Huang, Cheng-Ta Yang, Cheng-Hsun Chiu, Peng-Nien Huang, Kuo-Ming Lee, Guang-Wu Chen, Shin-Ru Shih                                                                                                                                  |
| hCoV-19/Taiwan/CGMH-CGU-25/2020 | EPI_ISL_44278 | - | Laboratory Medicine                                             | Department of Laboratory Medicine, Lin-Kou Chang Gung Memorial Hospital, Taoyuan, Taiwan<br>Kuo-Chien Tsao, Yu-Nong Gong, Shu-Li Yang, Yi-Chun Liu, Chung-Guei Huang, Mei-Jen Hsiao, Po-Wei Huang, Cheng-Ta Yang, Cheng-Hsun Chiu, Peng-Nien Huang, Kuo-Ming Lee, Guang-Wu Chen, Shin-Ru Shih |
| hCoV-19/Taiwan/CGMH-CGU-24/2020 | EPI_ISL_44277 | - | Laboratory Medicine                                             | Department of Laboratory Medicine, Lin-Kou Chang Gung Memorial Hospital, Taoyuan, Taiwan<br>Kuo-Chien Tsao, Yu-Nong Gong, Shu-Li Yang, Yi-Chun Liu, Chung-Guei Huang, Mei-Jen Hsiao, Po-Wei Huang, Cheng-Ta Yang, Cheng-Hsun Chiu, Peng-Nien Huang, Kuo-Ming Lee, Guang-Wu Chen, Shin-Ru Shih |
| hCoV-19/Taiwan/CGMH-CGU-23/2020 | EPI_ISL_44276 | - | Laboratory Medicine                                             | Department of Laboratory Medicine, Lin-Kou Chang Gung Memorial Hospital, Taoyuan, Taiwan<br>Kuo-Chien Tsao, Yu-Nong Gong, Shu-Li Yang, Yi-Chun Liu, Chung-Guei Huang, Mei-Jen Hsiao, Po-Wei Huang, Cheng-Ta Yang, Cheng-Hsun Chiu, Peng-Nien Huang, Kuo-Ming Lee, Guang-Wu Chen, Shin-Ru Shih |
| hCoV-19/Taiwan/CGMH-CGU-21/2020 | EPI_ISL_44274 | - | Laboratory Medicine                                             | Department of Laboratory Medicine, Lin-Kou Chang Gung Memorial Hospital, Taoyuan, Taiwan<br>Kuo-Chien Tsao, Yu-Nong Gong, Shu-Li Yang, Yi-Chun Liu, Chung-Guei Huang, Mei-Jen Hsiao, Po-Wei Huang, Cheng-Ta Yang, Cheng-Hsun Chiu, Peng-Nien Huang, Kuo-Ming Lee, Guang-Wu Chen, Shin-Ru Shih |

|                                 |                    |   |                        | Ru Shih                                                                                                        |                                                                                                                                                                                                                                   |
|---------------------------------|--------------------|---|------------------------|----------------------------------------------------------------------------------------------------------------|-----------------------------------------------------------------------------------------------------------------------------------------------------------------------------------------------------------------------------------|
| hCoV-19/Taiwan/CGMH-CGU-20/2020 | EPI_ISL_4<br>24978 | - | Laboratory<br>Medicine | Department of<br>Laboratory<br>Medicine, Lin-<br>Kou Chang Gung<br>Memorial<br>Hospital,<br>Taoyuan,<br>Taiwan | Kuo-Chien Tsao, Yu-<br>Nong Gong, Shu-Li<br>Yang, Yi-Chun Liu,<br>Chung-Guei Huang,<br>Mei-Jen Hsiao, Po-Wei<br>Huang, Cheng-Ta<br>Yang, Cheng-Hsun<br>Chiu, Peng-Nien<br>Huang, Kuo-Ming Lee,<br>Guang-Wu Chen, Shin-<br>Ru Shih |
| hCoV-19/Taiwan/CGMH-CGU-19/2020 | EPI_ISL_4<br>24975 | - | Laboratory<br>Medicine | Department of<br>Laboratory<br>Medicine, Lin-<br>Kou Chang Gung<br>Memorial<br>Hospital,<br>Taoyuan,<br>Taiwan | Kuo-Chien Tsao, Yu-<br>Nong Gong, Shu-Li<br>Yang, Yi-Chun Liu,<br>Chung-Guei Huang,<br>Mei-Jen Hsiao, Po-Wei<br>Huang, Cheng-Ta<br>Yang, Cheng-Hsun<br>Chiu, Peng-Nien<br>Huang, Kuo-Ming Lee,<br>Guang-Wu Chen, Shin-<br>Ru Shih |
| hCoV-19/Taiwan/CGMH-CGU-18/2020 | EPI_ISL_4<br>24974 | - | Laboratory<br>Medicine | Department of<br>Laboratory<br>Medicine, Lin-<br>Kou Chang Gung<br>Memorial<br>Hospital,<br>Taoyuan,<br>Taiwan | Kuo-Chien Tsao, Yu-<br>Nong Gong, Shu-Li<br>Yang, Yi-Chun Liu,<br>Chung-Guei Huang,<br>Mei-Jen Hsiao, Po-Wei<br>Huang, Cheng-Ta<br>Yang, Cheng-Hsun<br>Chiu, Peng-Nien<br>Huang, Kuo-Ming Lee,<br>Guang-Wu Chen, Shin-<br>Ru Shih |
| hCoV-19/Taiwan/CGMH-CGU-17/2020 | EPI_ISL_4<br>24973 | - | Laboratory<br>Medicine | Department of<br>Laboratory<br>Medicine, Lin-<br>Kou Chang Gung<br>Memorial<br>Hospital,<br>Taoyuan,<br>Taiwan | Kuo-Chien Tsao, Yu-<br>Nong Gong, Shu-Li<br>Yang, Yi-Chun Liu,<br>Chung-Guei Huang,<br>Mei-Jen Hsiao, Po-Wei<br>Huang, Cheng-Ta<br>Yang, Cheng-Hsun<br>Chiu, Peng-Nien<br>Huang, Kuo-Ming Lee,<br>Guang-Wu Chen, Shin-<br>Ru Shih |
| hCoV-19/Taiwan/CGMH-CGU-16/2020 | EPI_ISL_4<br>24972 | - | Laboratory<br>Medicine | Department of<br>Laboratory<br>Medicine, Lin-<br>Kou Chang Gung<br>Memorial<br>Hospital,<br>Taoyuan,           | Kuo-Chien Tsao, Yu-<br>Nong Gong, Shu-Li<br>Yang, Yi-Chun Liu,<br>Chung-Guei Huang,<br>Mei-Jen Hsiao, Po-Wei<br>Huang, Cheng-Ta<br>Yang, Cheng-Hsun                                                                               |

|                                         |                    |   |                        |                                                                                                                |                                                                                                                                                                                                                                    |
|-----------------------------------------|--------------------|---|------------------------|----------------------------------------------------------------------------------------------------------------|------------------------------------------------------------------------------------------------------------------------------------------------------------------------------------------------------------------------------------|
|                                         |                    |   |                        | Taiwan                                                                                                         | Chiu, Peng-Nien<br>Huang, Kuo-Ming Lee,<br>Guang-Wu Chen, Shin-<br>Ru Shih                                                                                                                                                         |
| hCoV-<br>19/Taiwan/CGMH-<br>CGU-15/2020 | EPI_ISL_4<br>24971 | - | Laboratory<br>Medicine | Department of<br>Laboratory<br>Medicine, Lin-<br>Kou Chang Gung<br>Memorial<br>Hospital,<br>Taoyuan,<br>Taiwan | Kuo-Chien Tsao, Yu-<br>Nong Gong, Shu-Li<br>Yang, Yi-Chun Liu,<br>Chung-Guei Huang,<br>Mei-Jen Hsiao, Po-Wei<br>Huang, Cheng-Ta<br>Yang, Cheng-Hsun<br>Chiu, Peng-Nien<br>Huang, Kuo-Ming Lee,<br>Guang-Wu Chen, Shin-<br>Ru Shih  |
| hCoV-<br>19/Taiwan/CGMH-<br>CGU-14/2020 | EPI_ISL_4<br>24970 | - | Laboratory<br>Medicine | Department of<br>Laboratory<br>Medicine, Lin-<br>Kou Chang Gung<br>Memorial<br>Hospital,<br>Taoyuan,<br>Taiwan | Kuo-Chien Tsao, Yu-<br>Nong Gong, Shu-Li<br>Yang, Yi-Chun Liu,<br>Chung-Guei Huang,<br>Mei-Jen Hsiao, Po-Wei<br>Huang, Cheng-Ta<br>Yang, Cheng-Hsun<br>Chiu, Peng-Nien<br>Huang, Kuo-Ming Lee,<br>Guang-Wu Chen, Shin-<br>Ru Shih  |
| hCoV-<br>19/Taiwan/CGMH-<br>CGU-13/2020 | EPI_ISL_4<br>24969 | - | Laboratory<br>Medicine | Department of<br>Laboratory<br>Medicine, Lin-<br>Kou Chang Gung<br>Memorial<br>Hospital,<br>Taoyuan,<br>Taiwan | Kuo-Chien Tsao, Yu-<br>Nong Gong, Shu-Li<br>Yang, Yi-Chun Liu,<br>Chung-Guei Huang,<br>Mei-Jen Hsiao, Po-Wei<br>Huang, Cheng-Ta<br>Yang, Cheng-Hsun<br>Chiu, Peng-Nien<br>Huang, Kuo-Ming Lee,<br>Guang-Wu Chen, Shin-<br>Ru Shih  |
| hCoV-<br>19/Taiwan/CGMH-<br>CGU-12/2020 | EPI_ISL_4<br>17525 | - | Laboratory<br>Medicine | Department of<br>Laboratory<br>Medicine, Lin-<br>Kou Chang Gung<br>Memorial<br>Hospital,<br>Taoyuan,<br>Taiwan | Kuo-Chien Tsao, Yu-<br>Nong Gong, Shu-Li<br>Yang, Yi-Chun Liu,<br>Chung-Guei Huang,<br>Po-Wei Huang, Mei-<br>Jen Hsiao, Cheng-Ta<br>Yang, Cheng-Hsun<br>Chiu, Peng-Nien<br>Huang, Kuo-Ming Lee,<br>Guang-Wu Chen, Shin-<br>Ru Shih |
| hCoV-<br>19/Taiwan/CGMH-<br>CGU-11/2020 | EPI_ISL_4<br>17524 | - | Laboratory<br>Medicine | Department of<br>Laboratory<br>Medicine, Lin-<br>Kou Chang Gung                                                | Kuo-Chien Tsao, Yu-<br>Nong Gong, Shu-Li<br>Yang, Yi-Chun Liu,<br>Chung-Guei Huang,                                                                                                                                                |

|                                 |                 |   |                     |                                                                                          |                                                                                                                                                                                                   |
|---------------------------------|-----------------|---|---------------------|------------------------------------------------------------------------------------------|---------------------------------------------------------------------------------------------------------------------------------------------------------------------------------------------------|
|                                 |                 |   |                     | Memorial Hospital, Taoyuan, Taiwan                                                       | Po-Wei Huang, Mei-Jen Hsiao, Cheng-Ta Yang, Cheng-Hsun Chiu, Peng-Nien Huang, Kuo-Ming Lee, Guang-Wu Chen, Shin-Ru Shih                                                                           |
| hCoV-19/Taiwan/CGMH-CGU-10/2020 | EPI_ISL_4 17523 | - | Laboratory Medicine | Department of Laboratory Medicine, Lin-Kou Chang Gung Memorial Hospital, Taoyuan, Taiwan | Kuo-Chien Tsao, Yu-Nong Gong, Shu-Li Yang, Yi-Chun Liu, Chung-Guei Huang, Po-Wei Huang, Mei-Jen Hsiao, Cheng-Ta Yang, Cheng-Hsun Chiu, Peng-Nien Huang, Kuo-Ming Lee, Guang-Wu Chen, Shin-Ru Shih |
| hCoV-19/Taiwan/CGMH-CGU-09/2020 | EPI_ISL_4 17522 | - | Laboratory Medicine | Department of Laboratory Medicine, Lin-Kou Chang Gung Memorial Hospital, Taoyuan, Taiwan | Kuo-Chien Tsao, Yu-Nong Gong, Shu-Li Yang, Yi-Chun Liu, Chung-Guei Huang, Po-Wei Huang, Mei-Jen Hsiao, Cheng-Ta Yang, Cheng-Hsun Chiu, Peng-Nien Huang, Kuo-Ming Lee, Guang-Wu Chen, Shin-Ru Shih |
| hCoV-19/Taiwan/CGMH-CGU-08/2020 | EPI_ISL_4 17521 | - | Laboratory Medicine | Department of Laboratory Medicine, Lin-Kou Chang Gung Memorial Hospital, Taoyuan, Taiwan | Kuo-Chien Tsao, Yu-Nong Gong, Shu-Li Yang, Yi-Chun Liu, Chung-Guei Huang, Po-Wei Huang, Mei-Jen Hsiao, Cheng-Ta Yang, Cheng-Hsun Chiu, Peng-Nien Huang, Kuo-Ming Lee, Guang-Wu Chen, Shin-Ru Shih |
| hCoV-19/Taiwan/CGMH-CGU-07/2020 | EPI_ISL_4 17520 | - | Laboratory Medicine | Department of Laboratory Medicine, Lin-Kou Chang Gung Memorial Hospital, Taoyuan, Taiwan | Kuo-Chien Tsao, Yu-Nong Gong, Shu-Li Yang, Yi-Chun Liu, Chung-Guei Huang, Po-Wei Huang, Mei-Jen Hsiao, Cheng-Ta Yang, Cheng-Hsun Chiu, Peng-Nien Huang, Kuo-Ming Lee, Guang-Wu Chen, Shin-Ru Shih |
| hCoV-                           | EPI_ISL_4       | - | Laboratory Medicine | Department of                                                                            | Kuo-Chien Tsao, Yu-                                                                                                                                                                               |

|                                         |                      |  |                        |                                                                                                                |                                                                                                                                                                                                                                                                                   |
|-----------------------------------------|----------------------|--|------------------------|----------------------------------------------------------------------------------------------------------------|-----------------------------------------------------------------------------------------------------------------------------------------------------------------------------------------------------------------------------------------------------------------------------------|
| 19/Taiwan/CGMH-<br>CGU-06/2020          | 17519                |  | Medicine               | Laboratory<br>Medicine, Lin-<br>Kou Chang Gung<br>Memorial<br>Hospital,<br>Taoyuan,<br>Taiwan                  | Nong Gong, Shu-Li<br>Yang, Yi-Chun Liu,<br>Chung-Guei Huang,<br>Po-Wei Huang, Mei-<br>Jen Hsiao, Cheng-Ta<br>Yang, Cheng-Hsun<br>Chiu, Peng-Nien<br>Huang, Kuo-Ming Lee,<br>Guang-Wu Chen, Shin-<br>Ru Shih                                                                       |
| hCoV-<br>19/Taiwan/CGMH-<br>CGU-05/2020 | EPI_ISL_4 -<br>15743 |  | Laboratory<br>Medicine | Department of<br>Laboratory<br>Medicine, Lin-<br>Kou Chang Gung<br>Memorial<br>Hospital,<br>Taoyuan,<br>Taiwan | Kuo-Chien Tsao, Yu-<br>Nong Gong, Shu-Li<br>Yang, Yi-Chun Liu,<br>Chung-Guei Huang,<br>Po-Wei Huang, Mei-<br>Jen Hsiao, Cheng-Ta<br>Yang, Cheng-Hsun<br>Chiu, Chi-Hsien Huang,<br>Kuang-Tso Le, Shu-Min<br>Lin, Peng-Nien Huang,<br>Kuo-Ming Lee, Guang-<br>Wu Chen, Shin-Ru Shih |
| hCoV-<br>19/Taiwan/CGMH-<br>CGU-04/2020 | EPI_ISL_4 -<br>15742 |  | Laboratory<br>Medicine | Department of<br>Laboratory<br>Medicine, Lin-<br>Kou Chang Gung<br>Memorial<br>Hospital,<br>Taoyuan,<br>Taiwan | Kuo-Chien Tsao, Yu-<br>Nong Gong, Shu-Li<br>Yang, Yi-Chun Liu,<br>Chung-Guei Huang,<br>Po-Wei Huang, Mei-<br>Jen Hsiao, Cheng-Ta<br>Yang, Cheng-Hsun<br>Chiu, Chi-Hsien Huang,<br>Kuang-Tso Le, Shu-Min<br>Lin, Peng-Nien Huang,<br>Kuo-Ming Lee, Guang-<br>Wu Chen, Shin-Ru Shih |
| hCoV-<br>19/Taiwan/CGMH-<br>CGU-03/2020 | EPI_ISL_4 -<br>15741 |  | Laboratory<br>Medicine | Department of<br>Laboratory<br>Medicine, Lin-<br>Kou Chang Gung<br>Memorial<br>Hospital,<br>Taoyuan,<br>Taiwan | Kuo-Chien Tsao, Yu-<br>Nong Gong, Shu-Li<br>Yang, Yi-Chun Liu,<br>Chung-Guei Huang,<br>Po-Wei Huang, Mei-<br>Jen Hsiao, Cheng-Ta<br>Yang, Cheng-Hsun<br>Chiu, Chi-Hsien Huang,<br>Kuang-Tso Le, Shu-Min<br>Lin, Peng-Nien Huang,<br>Kuo-Ming Lee, Guang-<br>Wu Chen, Shin-Ru Shih |
| hCoV-<br>19/Taiwan/CGMH-<br>CGU-02/2020 | EPI_ISL_4 -<br>17518 |  | Laboratory<br>Medicine | Department of<br>Laboratory<br>Medicine, Lin-<br>Kou Chang Gung<br>Memorial<br>Hospital,                       | Kuo-Chien Tsao, Yu-<br>Nong Gong, Shu-Li<br>Yang, Yi-Chun Liu,<br>Chung-Guei Huang,<br>Po-Wei Huang, Mei-<br>Jen Hsiao, Cheng-Ta                                                                                                                                                  |

|                                          |                      |   |                                                                                              |                                                                                              |                                                                                                |
|------------------------------------------|----------------------|---|----------------------------------------------------------------------------------------------|----------------------------------------------------------------------------------------------|------------------------------------------------------------------------------------------------|
|                                          |                      |   |                                                                                              | Taoyuan,<br>Taiwan                                                                           | Yang, Cheng-Hsun<br>Chiu, Peng-Nien<br>Huang, Kuo-Ming Lee,<br>Guang-Wu Chen, Shin-<br>Ru Shih |
| hCoV-<br>19/Taiwan/9098/2021             | EPI_ISL_3<br>040149  | - | Centers for<br>Disease Control,<br>R.O.C. (Taiwan)                                           | Centers for<br>Disease Control,<br>R.O.C. (Taiwan)                                           | Ji-Rong Yang, Yu-Chi-<br>Lin, Jung-Jung Mu,<br>Ming-Tsan-Liu                                   |
| hCoV-<br>19/Taiwan/906/2021              | EPI_ISL_5<br>854262  | - | Centers for<br>Disease Control,<br>R.O.C. (Taiwan)                                           | Centers for<br>Disease Control,<br>R.O.C. (Taiwan)                                           | Ji-Rong Yang, Yu-Chi-<br>Lin, Jung-Jung Mu,<br>Ming-Tsan-Liu                                   |
| hCoV-<br>19/Taiwan/823622116<br>098/2022 | EPI_ISL_1<br>3692642 | - | Virology<br>Lab,Department<br>of Pathology,<br>National Cheng<br>Kung University<br>Hospital | Virology<br>Lab,Department<br>of Pathology,<br>National Cheng<br>Kung University<br>Hospital | Huey-Pin Tsai, et al                                                                           |
| hCoV-<br>19/Taiwan/823622115<br>792/2022 | EPI_ISL_1<br>3692643 | - | Virology<br>Lab,Department<br>of Pathology,<br>National Cheng<br>Kung University<br>Hospital | Virology<br>Lab,Department<br>of Pathology,<br>National Cheng<br>Kung University<br>Hospital | Huey-Pin Tsai, et al                                                                           |
| hCoV-<br>19/Taiwan/823622114<br>192/2022 | EPI_ISL_1<br>3692640 | - | Virology<br>Lab,Department<br>of Pathology,<br>National Cheng<br>Kung University<br>Hospital | Virology<br>Lab,Department<br>of Pathology,<br>National Cheng<br>Kung University<br>Hospital | Huey-Pin Tsai, et al                                                                           |
| hCoV-<br>19/Taiwan/823622108<br>910/2022 | EPI_ISL_1<br>3692641 | - | Virology<br>Lab,Department<br>of Pathology,<br>National Cheng<br>Kung University<br>Hospital | Virology<br>Lab,Department<br>of Pathology,<br>National Cheng<br>Kung University<br>Hospital | Huey-Pin Tsai, et al                                                                           |
| hCoV-<br>19/Taiwan/823622088<br>157/2022 | EPI_ISL_1<br>3692636 | - | Virology<br>Lab,Department<br>of Pathology,<br>National Cheng<br>Kung University<br>Hospital | Virology<br>Lab,Department<br>of Pathology,<br>National Cheng<br>Kung University<br>Hospital | Huey-Pin Tsai, et al                                                                           |
| hCoV-<br>19/Taiwan/823622071<br>761/2022 | EPI_ISL_1<br>3167520 | - | Virology<br>Lab,Department<br>of Pathology,<br>National Cheng<br>Kung University<br>Hospital | Virology<br>Lab,Department<br>of Pathology,<br>National Cheng<br>Kung University<br>Hospital | Huey-Pin Tsai, et al                                                                           |
| hCoV-<br>19/Taiwan/814621/20<br>22       | EPI_ISL_1<br>3198730 | - | Centers for<br>Disease Control,<br>R.O.C. (Taiwan)                                           | Centers for<br>Disease Control,<br>R.O.C. (Taiwan)                                           | Ji-Rong Yang, Yu-Chi-<br>Lin, Jung-Jung Mu,<br>Ming-Tsan-Liu                                   |
| hCoV-<br>19/Taiwan/812/2021              | EPI_ISL_8<br>57314   | - | Centers for<br>Disease Control,                                                              | Centers for<br>Disease Control,                                                              | Ji-Rong Yang, Yu-Chi<br>Lin, Jung-Jung-Mu,                                                     |

|                            |                      |   |                                              |                                              |                                                                    |
|----------------------------|----------------------|---|----------------------------------------------|----------------------------------------------|--------------------------------------------------------------------|
|                            |                      |   | R.O.C. (Taiwan)                              | R.O.C. (Taiwan)                              | Ming-Tsan Liu                                                      |
| hCoV-19/Taiwan/8/2020      | EPI_ISL_4<br>28488   | - | Centers for Disease Control, R.O.C. (Taiwan) | Centers for Disease Control, R.O.C. (Taiwan) | Ji-Rong Yang, Yu-Chi Lin, Jung-Jung Mu, Ming-Tsan Liu              |
| hCoV-19/Taiwan/7955/2021   | EPI_ISL_3<br>040151  | - | Centers for Disease Control, R.O.C. (Taiwan) | Centers for Disease Control, R.O.C. (Taiwan) | Ji-Rong Yang, Yu-Chi Lin, Jung-Jung Mu, Ming-Tsan-Liu              |
| hCoV-19/Taiwan/792/2020    | EPI_ISL_1<br>381386  | - | Centers for Disease Control, R.O.C. (Taiwan) | Centers for Disease Control, R.O.C. (Taiwan) | Ji-Rong Yang, Yu-Chi Lin, Jung-Jung Mu, Ming-Tsan Liu              |
| hCoV-19/Taiwan/78/2020     | EPI_ISL_4<br>28490   | - | Centers for Disease Control, R.O.C. (Taiwan) | Centers for Disease Control, R.O.C. (Taiwan) | Ji-Rong Yang, Yu-Chi Lin, Jung-Jung Mu, Ming-Tsan Liu              |
| hCoV-19/Taiwan/58/2020     | EPI_ISL_4<br>28491   | - | Centers for Disease Control, R.O.C. (Taiwan) | Centers for Disease Control, R.O.C. (Taiwan) | Ji-Rong Yang, Yu-Chi Lin, Jung-Jung Mu, Ming-Tsan Liu              |
| hCoV-19/Taiwan/5703/2021   | EPI_ISL_3<br>000790  | - | Centers for Disease Control, R.O.C. (Taiwan) | Centers for Disease Control, R.O.C. (Taiwan) | Ji-Rong Yang, Yu-Chi Lin, Jung-Jung Mu, Ming-Tsan-Liu              |
| hCoV-19/Taiwan/5/2020      | EPI_ISL_4<br>28489   | - | Centers for Disease Control, R.O.C. (Taiwan) | Centers for Disease Control, R.O.C. (Taiwan) | Ji-Rong Yang, Yu-Chi Lin, Jung-Jung Mu, Ming-Tsan Liu              |
| hCoV-19/Taiwan/379368/2022 | EPI_ISL_1<br>3198731 | - | Centers for Disease Control, R.O.C. (Taiwan) | Centers for Disease Control, R.O.C. (Taiwan) | Ji-Rong Yang, Yu-Chi Lin, Jung-Jung Mu, Ming-Tsan-Liu              |
| hCoV-19/Taiwan/369358/2022 | EPI_ISL_1<br>3198729 | - | Centers for Disease Control, R.O.C. (Taiwan) | Centers for Disease Control, R.O.C. (Taiwan) | Ji-Rong Yang, Yu-Chi Lin, Jung-Jung Mu, Ming-Tsan-Liu              |
| hCoV-19/Taiwan/3445/2021   | EPI_ISL_2<br>455329  | - | Centers for Disease Control, R.O.C. (Taiwan) | Centers for Disease Control, R.O.C. (Taiwan) | Ji-Rong Yang, Yu-Chi Lin, Jung-Jung Mu, Ming-Tsan-Liu              |
| hCoV-19/Taiwan/3/2020      | EPI_ISL_4<br>11926   | - | Taiwan Centers for Disease Control           | Taiwan Centers for Disease Control           | Ji-Rong Yang, Yu-Chi Lin, Jung-Jung Mu, Ming-Tsan-Liu              |
| hCoV-19/Taiwan/299/2020    | EPI_ISL_4<br>29882   | - | Centers for Disease Control, R.O.C. (Taiwan) | Centers for Disease Control, R.O.C. (Taiwan) | Ji-Rong Yang, Yu-Chi Lin, Jung-Jung Mu, Ming-Tsan Liu              |
| hCoV-19/Taiwan/284/2020    | EPI_ISL_4<br>29884   | - | Centers for Disease Control, R.O.C. (Taiwan) | Centers for Disease Control, R.O.C. (Taiwan) | Ji-Rong Yang, Yu-Chi Lin, Jung-Jung Mu, Ming-Tsan Liu              |
| hCoV-19/Taiwan/2262/2021   | EPI_ISL_2<br>455330  | - | Centers for Disease Control, R.O.C. (Taiwan) | Centers for Disease Control, R.O.C. (Taiwan) | Ji-Rong Yang, Yu-Chi Lin, Jung-Jung Mu, Ming-Tsan-Liu              |
| hCoV-19/Taiwan/225/2020    | EPI_ISL_4<br>21651   | - | Centers for Disease Control, R.O.C. (Taiwan) | Centers for Disease Control, R.O.C. (Taiwan) | Ji-Rong Yang, Yu-Chi Lin, Jung-Jung Mu, Ming-Tsan Liu              |
| hCoV-19/Taiwan/2/2020      | EPI_ISL_4<br>06031   | - | Centers for Disease Control, R.O.C. (Taiwan) | Centers for Disease Control, R.O.C. (Taiwan) | Ji-Rong Yang, Yu-Chi Lin, Jung-Jung Mu, Ming-Tsan Liu, Shu-Ying Li |
| hCoV-                      | EPI_ISL_1            | - | Virology Lab,                                | Virology Lab,                                | Huey-Pin Tsai, et al                                               |

|                             |                      |   |                                                                                |                                                                                |                                                       |
|-----------------------------|----------------------|---|--------------------------------------------------------------------------------|--------------------------------------------------------------------------------|-------------------------------------------------------|
| 19/Taiwan/1797952/2022      | 3237696              |   | Department of Pathology, National Cheng Kung University Hospital               | Department of Pathology, National Cheng Kung University Hospital               |                                                       |
| hCoV-19/Taiwan/1797390/2022 | EPI_ISL_1<br>3237454 | - | Virology Lab, Department of Pathology, National Cheng Kung University Hospital | Virology Lab, Department of Pathology, National Cheng Kung University Hospital | Huey-Pin Tsai, et al                                  |
| hCoV-19/Taiwan/1797389/2022 | EPI_ISL_1<br>3237132 | - | Virology Lab, Department of Pathology, National Cheng Kung University Hospital | Virology Lab, Department of Pathology, National Cheng Kung University Hospital | Huey-Pin Tsai, et al                                  |
| hCoV-19/Taiwan/1797243/2022 | EPI_ISL_1<br>3234977 | - | Virology Lab, Department of Pathology, National Cheng Kung University Hospital | Virology Lab, Department of Pathology, National Cheng Kung University Hospital | Huey-Pin Tsai, et al                                  |
| hCoV-19/Taiwan/1794569/2021 | EPI_ISL_1<br>3234976 | - | Virology Lab, Department of Pathology, National Cheng Kung University Hospital | Virology Lab, Department of Pathology, National Cheng Kung University Hospital | Huey-Pin Tsai, et al                                  |
| hCoV-19/Taiwan/1765277/2021 | EPI_ISL_1<br>3234975 | - | Virology Lab, Department of Pathology, National Cheng Kung University Hospital | Virology Lab, Department of Pathology, National Cheng Kung University Hospital | Huey-Pin Tsai, et al                                  |
| hCoV-19/Taiwan/1765252/2021 | EPI_ISL_1<br>3234974 | - | Virology Lab, Department of Pathology, National Cheng Kung University Hospital | Virology Lab, Department of Pathology, National Cheng Kung University Hospital | Huey-Pin Tsai, et al                                  |
| hCoV-19/Taiwan/17099/2021   | EPI_ISL_1<br>3536113 | - | Centers for Disease Control, R.O.C. (Taiwan)                                   | Centers for Disease Control, R.O.C. (Taiwan)                                   | Ji-Rong Yang, Yu-Chi-Lin, Jung-Jung Mu, Ming-Tsan-Liu |
| hCoV-19/Taiwan/17085/2021   | EPI_ISL_1<br>3535983 | - | Centers for Disease Control, R.O.C. (Taiwan)                                   | Centers for Disease Control, R.O.C. (Taiwan)                                   | Ji-Rong Yang, Yu-Chi-Lin, Jung-Jung Mu, Ming-Tsan-Liu |
| hCoV-19/Taiwan/17058/2021   | EPI_ISL_1<br>3535670 | - | Centers for Disease Control, R.O.C. (Taiwan)                                   | Centers for Disease Control, R.O.C. (Taiwan)                                   | Ji-Rong Yang, Yu-Chi-Lin, Jung-Jung Mu, Ming-Tsan-Liu |
| hCoV-19/Taiwan/170/2020     | EPI_ISL_4<br>20084   | - | Centers for Disease Control,                                                   | Centers for Disease Control,                                                   | Ji-Rong Yang, Yu-Chi-Lin, Jung-Jung Mu,               |



|                             |                      |   | R.O.C. (Taiwan)                                                                               | R.O.C. (Taiwan)                                                                               | Ming-Tsan Liu                                         |
|-----------------------------|----------------------|---|-----------------------------------------------------------------------------------------------|-----------------------------------------------------------------------------------------------|-------------------------------------------------------|
| hCoV-19/Taiwan/1695825/2022 | EPI_ISL_1<br>3234973 | - | Virology Lab,<br>Department of<br>Pathology,<br>National Cheng<br>Kung University<br>Hospital | Virology Lab,<br>Department of<br>Pathology,<br>National Cheng<br>Kung University<br>Hospital | Huey-Pin Tsai, et al                                  |
| hCoV-19/Taiwan/16028/2021   | EPI_ISL_3<br>987576  | - | Centers for<br>Disease Control,<br>R.O.C. (Taiwan)                                            | Centers for<br>Disease Control,<br>R.O.C. (Taiwan)                                            | Ji-Rong Yang, Yu-Chi-Lin, Jung-Jung Mu, Ming-Tsan-Liu |
| hCoV-19/Taiwan/14454/2021   | EPI_ISL_3<br>040142  | - | Centers for<br>Disease Control,<br>R.O.C. (Taiwan)                                            | Centers for<br>Disease Control,<br>R.O.C. (Taiwan)                                            | Ji-Rong Yang, Yu-Chi-Lin, Jung-Jung Mu, Ming-Tsan-Liu |
| hCoV-19/Taiwan/14409/2021   | EPI_ISL_3<br>000157  | - | Centers for<br>Disease Control,<br>R.O.C. (Taiwan)                                            | Centers for<br>Disease Control,<br>R.O.C. (Taiwan)                                            | Ji-Rong Yang, Yu-Chi-Lin, Jung-Jung Mu, Ming-Tsan-Liu |
| hCoV-19/Taiwan/144/2020     | EPI_ISL_4<br>21641   | - | Centers for<br>Disease Control,<br>R.O.C. (Taiwan)                                            | Centers for<br>Disease Control,<br>R.O.C. (Taiwan)                                            | Ji-Rong Yang, Yu-Chi-Lin, Jung-Jung Mu, Ming-Tsan Liu |
| hCoV-19/Taiwan/14298/2021   | EPI_ISL_3<br>000160  | - | Centers for<br>Disease Control,<br>R.O.C. (Taiwan)                                            | Centers for<br>Disease Control,<br>R.O.C. (Taiwan)                                            | Ji-Rong Yang, Yu-Chi-Lin, Jung-Jung Mu, Ming-Tsan-Liu |
| hCoV-19/Taiwan/14222/2021   | EPI_ISL_3<br>040143  | - | Centers for<br>Disease Control,<br>R.O.C. (Taiwan)                                            | Centers for<br>Disease Control,<br>R.O.C. (Taiwan)                                            | Ji-Rong Yang, Yu-Chi-Lin, Jung-Jung Mu, Ming-Tsan-Liu |
| hCoV-19/Taiwan/13564/2021   | EPI_ISL_3<br>001368  | - | Centers for<br>Disease Control,<br>R.O.C. (Taiwan)                                            | Centers for<br>Disease Control,<br>R.O.C. (Taiwan)                                            | Ji-Rong Yang, Yu-Chi-Lin, Jung-Jung Mu, Ming-Tsan-Liu |
| hCoV-19/Taiwan/13435/2021   | EPI_ISL_3<br>040140  | - | Centers for<br>Disease Control,<br>R.O.C. (Taiwan)                                            | Centers for<br>Disease Control,<br>R.O.C. (Taiwan)                                            | Ji-Rong Yang, Yu-Chi-Lin, Jung-Jung Mu, Ming-Tsan-Liu |
| hCoV-19/Taiwan/13375/2021   | EPI_ISL_3<br>001055  | - | Centers for<br>Disease Control,<br>R.O.C. (Taiwan)                                            | Centers for<br>Disease Control,<br>R.O.C. (Taiwan)                                            | Ji-Rong Yang, Yu-Chi-Lin, Jung-Jung Mu, Ming-Tsan-Liu |
| hCoV-19/Taiwan/13332/2021   | EPI_ISL_2<br>705575  | - | Centers for<br>Disease Control,<br>R.O.C. (Taiwan)                                            | Centers for<br>Disease Control,<br>R.O.C. (Taiwan)                                            | Ji-Rong Yang, Yu-Chi-Lin, Jung-Jung Mu, Ming-Tsan-Liu |
| hCoV-19/Taiwan/12857/2021   | EPI_ISL_3<br>001841  | - | Centers for<br>Disease Control,<br>R.O.C. (Taiwan)                                            | Centers for<br>Disease Control,<br>R.O.C. (Taiwan)                                            | Ji-Rong Yang, Yu-Chi-Lin, Jung-Jung Mu, Ming-Tsan-Liu |
| hCoV-19/Taiwan/12828/2021   | EPI_ISL_3<br>040141  | - | Centers for<br>Disease Control,<br>R.O.C. (Taiwan)                                            | Centers for<br>Disease Control,<br>R.O.C. (Taiwan)                                            | Ji-Rong Yang, Yu-Chi-Lin, Jung-Jung Mu, Ming-Tsan-Liu |
| hCoV-19/Taiwan/128/2020     | EPI_ISL_4<br>20083   | - | Centers for<br>Disease Control,<br>R.O.C. (Taiwan)                                            | Centers for<br>Disease Control,<br>R.O.C. (Taiwan)                                            | Ji-Rong Yang, Yu-Chi-Lin, Jung-Jung Mu, Ming-Tsan Liu |
| hCoV-19/Taiwan/12699/2021   | EPI_ISL_3<br>002178  | - | Centers for<br>Disease Control,<br>R.O.C. (Taiwan)                                            | Centers for<br>Disease Control,<br>R.O.C. (Taiwan)                                            | Ji-Rong Yang, Yu-Chi-Lin, Jung-Jung Mu, Ming-Tsan-Liu |
| hCoV-19/Taiwan/125/2020     | EPI_ISL_4<br>20082   | - | Centers for<br>Disease Control,<br>R.O.C. (Taiwan)                                            | Centers for<br>Disease Control,<br>R.O.C. (Taiwan)                                            | Ji-Rong Yang, Yu-Chi-Lin, Jung-Jung Mu, Ming-Tsan Liu |

|                                   |                      |   |                                                                                |                                                                                |                                                       |
|-----------------------------------|----------------------|---|--------------------------------------------------------------------------------|--------------------------------------------------------------------------------|-------------------------------------------------------|
| hCoV-19/Taiwan/12288/2021         | EPI_ISL_3<br>040144  | - | Centers for Disease Control, R.O.C. (Taiwan)                                   | Centers for Disease Control, R.O.C. (Taiwan)                                   | Ji-Rong Yang, Yu-Chi-Lin, Jung-Jung Mu, Ming-Tsan-Liu |
| hCoV-19/Taiwan/1144/2021          | EPI_ISL_5<br>854263  | - | Centers for Disease Control, R.O.C. (Taiwan)                                   | Centers for Disease Control, R.O.C. (Taiwan)                                   | Ji-Rong Yang, Yu-Chi-Lin, Jung-Jung Mu, Ming-Tsan-Liu |
| hCoV-19/Taiwan/11310/2021         | EPI_ISL_3<br>040146  | - | Centers for Disease Control, R.O.C. (Taiwan)                                   | Centers for Disease Control, R.O.C. (Taiwan)                                   | Ji-Rong Yang, Yu-Chi-Lin, Jung-Jung Mu, Ming-Tsan-Liu |
| hCoV-19/Taiwan/11103/2021         | EPI_ISL_3<br>040147  | - | Centers for Disease Control, R.O.C. (Taiwan)                                   | Centers for Disease Control, R.O.C. (Taiwan)                                   | Ji-Rong Yang, Yu-Chi-Lin, Jung-Jung Mu, Ming-Tsan-Liu |
| hCoV-19/Taiwan/11102/2021         | EPI_ISL_3<br>040152  | - | Centers for Disease Control, R.O.C. (Taiwan)                                   | Centers for Disease Control, R.O.C. (Taiwan)                                   | Ji-Rong Yang, Yu-Chi-Lin, Jung-Jung Mu, Ming-Tsan-Liu |
| hCoV-19/Taiwan/11042/2021         | EPI_ISL_3<br>040145  | - | Centers for Disease Control, R.O.C. (Taiwan)                                   | Centers for Disease Control, R.O.C. (Taiwan)                                   | Ji-Rong Yang, Yu-Chi-Lin, Jung-Jung Mu, Ming-Tsan-Liu |
| hCoV-19/Taiwan/1103200326544/2021 | EPI_ISL_1<br>2667100 | - | Virology Lab, Department of Pathology, National Cheng Kung University Hospital | Virology Lab, Department of Pathology, National Cheng Kung University Hospital | Huey-Pin Tsai                                         |
| hCoV-19/Taiwan/1100500065622/2021 | EPI_ISL_1<br>2666626 | - | Virology Lab, Department of Pathology, National Cheng Kung University Hospital | Virology Lab, Department of Pathology, National Cheng Kung University Hospital | Huey-Pin Tsai, et al                                  |
| hCoV-19/Taiwan/108/2020           | EPI_ISL_4<br>29883   | - | Centers for Disease Control, R.O.C. (Taiwan)                                   | Centers for Disease Control, R.O.C. (Taiwan)                                   | Ji-Rong Yang, Yu-Chi-Lin, Jung-Jung Mu, Ming-Tsan-Liu |
| hCoV-19/Taiwan/1079/2021          | EPI_ISL_2<br>455264  | - | Centers for Disease Control, R.O.C. (Taiwan)                                   | Centers for Disease Control, R.O.C. (Taiwan)                                   | Ji-Rong Yang, Yu-Chi-Lin, Jung-Jung Mu, Ming-Tsan-Liu |
| hCoV-19/Taiwan/1078/2021          | EPI_ISL_2<br>455327  | - | Centers for Disease Control, R.O.C. (Taiwan)                                   | Centers for Disease Control, R.O.C. (Taiwan)                                   | Ji-Rong Yang, Yu-Chi-Lin, Jung-Jung Mu, Ming-Tsan-Liu |
| hCoV-19/Taiwan/10747/2021         | EPI_ISL_3<br>000409  | - | Centers for Disease Control, R.O.C. (Taiwan)                                   | Centers for Disease Control, R.O.C. (Taiwan)                                   | Ji-Rong Yang, Yu-Chi-Lin, Jung-Jung Mu, Ming-Tsan-Liu |
| hCoV-19/Taiwan/107/2020           | EPI_ISL_4<br>20085   | - | Centers for Disease Control, R.O.C. (Taiwan)                                   | Centers for Disease Control, R.O.C. (Taiwan)                                   | Ji-Rong Yang, Yu-Chi-Lin, Jung-Jung Mu, Ming-Tsan-Liu |
| hCoV-19/Taiwan/10321/2021         | EPI_ISL_3<br>040148  | - | Centers for Disease Control, R.O.C. (Taiwan)                                   | Centers for Disease Control, R.O.C. (Taiwan)                                   | Ji-Rong Yang, Yu-Chi-Lin, Jung-Jung Mu, Ming-Tsan-Liu |
| hCoV-19/Taiwan/1013/2021          | EPI_ISL_5<br>854267  | - | Centers for Disease Control, R.O.C. (Taiwan)                                   | Centers for Disease Control, R.O.C. (Taiwan)                                   | Ji-Rong Yang, Yu-Chi-Lin, Jung-Jung Mu, Ming-Tsan-Liu |
| hCoV-                             | EPI_ISL_1            | - | Virology                                                                       | Virology                                                                       | Huey-Pin Tsai, et al                                  |

|                                          |                      |   |                                                                                              |                                                                                              |                      |
|------------------------------------------|----------------------|---|----------------------------------------------------------------------------------------------|----------------------------------------------------------------------------------------------|----------------------|
| 19/Taiwan/061022009<br>185/2022          | 3692646              |   | Lab,Department<br>of Pathology,<br>National Cheng<br>Kung University<br>Hospital             | Lab,Department<br>of Pathology,<br>National Cheng<br>Kung University<br>Hospital             |                      |
| hCoV-<br>19/Taiwan/061022008<br>911/2022 | EPI_ISL_1<br>3692644 | - | Virology<br>Lab,Department<br>of Pathology,<br>National Cheng<br>Kung University<br>Hospital | Virology<br>Lab,Department<br>of Pathology,<br>National Cheng<br>Kung University<br>Hospital | Huey-Pin Tsai, et al |
| hCoV-<br>19/Taiwan/061022002<br>514/2022 | EPI_ISL_1<br>3692639 | - | Virology<br>Lab,Department<br>of Pathology,<br>National Cheng<br>Kung University<br>Hospital | Virology<br>Lab,Department<br>of Pathology,<br>National Cheng<br>Kung University<br>Hospital | Huey-Pin Tsai, et al |
| hCoV-<br>19/Taiwan/061022002<br>472/2022 | EPI_ISL_1<br>2667334 | - | Virology<br>Lab,Department<br>of Pathology,<br>National Cheng<br>Kung University<br>Hospital | Virology<br>Lab,Department<br>of Pathology,<br>National Cheng<br>Kung University<br>Hospital | Huey-Pin Tsai, et al |
| hCoV-<br>19/Taiwan/061022002<br>178/2022 | EPI_ISL_1<br>2667333 | - | Virology<br>Lab,Department<br>of Pathology,<br>National Cheng<br>Kung University<br>Hospital | Virology<br>Lab,Department<br>of Pathology,<br>National Cheng<br>Kung University<br>Hospital | Huey-Pin Tsai, et al |
| hCoV-<br>19/Taiwan/061022001<br>949/2022 | EPI_ISL_1<br>2667332 | - | Virology<br>Lab,Department<br>of Pathology,<br>National Cheng<br>Kung University<br>Hospital | Virology<br>Lab,Department<br>of Pathology,<br>National Cheng<br>Kung University<br>Hospital | Huey-Pin Tsai, et al |
| hCoV-<br>19/Taiwan/061022001<br>943/2022 | EPI_ISL_1<br>2667331 | - | Virology<br>Lab,Department<br>of Pathology,<br>National Cheng<br>Kung University<br>Hospital | Virology<br>Lab,Department<br>of Pathology,<br>National Cheng<br>Kung University<br>Hospital | Huey-Pin Tsai, et al |
| hCoV-<br>19/Taiwan/061022001<br>802/2022 | EPI_ISL_1<br>2667329 | - | Virology<br>Lab,Department<br>of Pathology,<br>National Cheng<br>Kung University<br>Hospital | Virology<br>Lab,Department<br>of Pathology,<br>National Cheng<br>Kung University<br>Hospital | Huey-Pin Tsai, et al |
| hCoV-<br>19/Taiwan/061022001<br>798/2022 | EPI_ISL_1<br>2667327 | - | Virology<br>Lab,Department<br>of Pathology,<br>National Cheng<br>Kung University             | Virology<br>Lab,Department<br>of Pathology,<br>National Cheng<br>Kung University             | Huey-Pin Tsai, et al |

|                                  |                      |   | Hospital                                                                                     | Hospital                                                                                     |                      |
|----------------------------------|----------------------|---|----------------------------------------------------------------------------------------------|----------------------------------------------------------------------------------------------|----------------------|
| hCoV-19/Taiwan/061022001700/2022 | EPI_ISL_1<br>2667325 | - | Virology<br>Lab,Department<br>of Pathology,<br>National Cheng<br>Kung University<br>Hospital | Virology<br>Lab,Department<br>of Pathology,<br>National Cheng<br>Kung University<br>Hospital | Huey-Pin Tsai, et al |
| hCoV-19/Taiwan/061022001696/2022 | EPI_ISL_1<br>2667324 | - | Virology<br>Lab,Department<br>of Pathology,<br>National Cheng<br>Kung University<br>Hospital | Virology<br>Lab,Department<br>of Pathology,<br>National Cheng<br>Kung University<br>Hospital | Huey-Pin Tsai, et al |
| hCoV-19/Taiwan/061022000659/2022 | EPI_ISL_1<br>3168845 | - | Virology<br>Lab,Department<br>of Pathology,<br>National Cheng<br>Kung University<br>Hospital | Virology<br>Lab,Department<br>of Pathology,<br>National Cheng<br>Kung University<br>Hospital | Huey-Pin Tsai, et al |
| hCoV-19/Taiwan/061022000353/2022 | EPI_ISL_1<br>2665905 | - | Virology<br>Lab,Department<br>of Pathology,<br>National Cheng<br>Kung University<br>Hospital | Virology<br>Lab,Department<br>of Pathology,<br>National Cheng<br>Kung University<br>Hospital | Huey-Pin Tsai        |
| hCoV-19/Taiwan/061022000210/2022 | EPI_ISL_1<br>3168995 | - | Virology<br>Lab,Department<br>of Pathology,<br>National Cheng<br>Kung University<br>Hospital | Virology<br>Lab,Department<br>of Pathology,<br>National Cheng<br>Kung University<br>Hospital | Huey-Pin Tsai, et al |
| hCoV-19/Taiwan/061022000209/2022 | EPI_ISL_1<br>2665904 | - | Virology<br>Lab,Department<br>of Pathology,<br>National Cheng<br>Kung University<br>Hospital | Virology<br>Lab,Department<br>of Pathology,<br>National Cheng<br>Kung University<br>Hospital | Huey-Pin Tsai        |
| hCoV-19/Taiwan/061022000208/2022 | EPI_ISL_1<br>3168994 | - | Virology<br>Lab,Department<br>of Pathology,<br>National Cheng<br>Kung University<br>Hospital | Virology<br>Lab,Department<br>of Pathology,<br>National Cheng<br>Kung University<br>Hospital | Huey-Pin Tsai, et al |
| hCoV-19/Taiwan/061022000207/2022 | EPI_ISL_1<br>3168993 | - | Virology<br>Lab,Department<br>of Pathology,<br>National Cheng<br>Kung University<br>Hospital | Virology<br>Lab,Department<br>of Pathology,<br>National Cheng<br>Kung University<br>Hospital | Huey-Pin Tsai, et al |
| hCoV-19/Taiwan/061022000205/2022 | EPI_ISL_1<br>2665833 | - | Virology<br>Lab,Department<br>of Pathology,                                                  | Virology<br>Lab,Department<br>of Pathology,                                                  | Huey-Pin Tsai, et al |

|                                         |                      |          |                                                                                |                                                                                |                                                                                                                                 |
|-----------------------------------------|----------------------|----------|--------------------------------------------------------------------------------|--------------------------------------------------------------------------------|---------------------------------------------------------------------------------------------------------------------------------|
|                                         |                      |          | National Cheng Kung University Hospital                                        | National Cheng Kung University Hospital                                        |                                                                                                                                 |
| hCoV-19/Taiwan/061022000087/2022        | EPI_ISL_1<br>3168846 | -        | Virology Lab, Department of Pathology, National Cheng Kung University Hospital | Virology Lab, Department of Pathology, National Cheng Kung University Hospital | Huey-Pin Tsai, et al                                                                                                            |
| hCoV-19/Taiwan/061020003933/2020        | EPI_ISL_1<br>2665832 | -        | Virology Lab, Department of Pathology, National Cheng Kung University Hospital | Virology Lab, Department of Pathology, National Cheng Kung University Hospital | Huey-Pin Tsai, et al                                                                                                            |
| hCoV-19/Taiwan/06-109-064485/2020       | EPI_ISL_1<br>2665831 | -        | Virology Lab, Department of Pathology, National Cheng Kung University Hospital | Virology Lab, Department of Pathology, National Cheng Kung University Hospital | Huey-Pin Tsai, et al                                                                                                            |
| Switzerland/ZH-ETHZ-35026221/2021       | EPI_ISL_8<br>807253  | OV668876 | Viollier AG; Hagnattstrasse 14, 4123 Allschwil                                 | ETH ZURICH D-BSSE                                                              | -                                                                                                                               |
| Switzerland/VD-ETHZ-33470977/2021       | EPI_ISL_3<br>297120  | OU573715 | Viollier AG; Hagnattstrasse 14, 4123 Allschwil                                 | ETH ZURICH D-BSSE                                                              | -                                                                                                                               |
| Switzerland/BS-UHB-43333655/2022        | EPI_ISL_9<br>999086  | OV912996 | Clinical Virology, University Hospital Basel, Basel, Switzerland               | University Hospital Basel                                                      | -                                                                                                                               |
| Switzerland/BE-ETHZ-481180/2021         | EPI_ISL_1<br>002016  | OD999762 | Computational evolution group, Mattenstrasse 26, Basel                         | ETH ZURICH D-BSSE                                                              | -                                                                                                                               |
| hCoV-19/Sweden/PEP378108/2022           | EPI_ISL_1<br>3522248 | -        | Swedish national genomic surveillance program of SARS-CoV-2                    | The Public Health Agency of Sweden                                             | Emmi Andersson, Maria Lind Karlberg, Alma Brolund, Swedish national genomic surveillance program of SARS-CoV-2                  |
| hCoV-19/Sweden/01_SE100_22CS104401/2022 | EPI_ISL_1<br>3625940 | -        | Karolinska University Hospital Huddinge                                        | Karolinska University Hospital                                                 | Jan Albert, Tobias Allander, Sandra Brodesson, Robert Dyrdak, Martin Ekman, Lynda Eneh, Shambhu Ganeshappa Aralaguppe, Natalija |

|                                           |                      |   |                                                                                   |                                                                                                                                                       |                                                                                                                                                                                                                                                                                                                                          |
|-------------------------------------------|----------------------|---|-----------------------------------------------------------------------------------|-------------------------------------------------------------------------------------------------------------------------------------------------------|------------------------------------------------------------------------------------------------------------------------------------------------------------------------------------------------------------------------------------------------------------------------------------------------------------------------------------------|
|                                           |                      |   |                                                                                   | Gerasimcik, Karina<br>Hentrich, Tanja<br>Normark, Henning<br>Onsbring, Maria<br>Ropat, Annika<br>Tiveljung Lindell,<br>Valtteri Wirta, Zhibing<br>Yun |                                                                                                                                                                                                                                                                                                                                          |
| hCoV-19/Spain/CT-<br>HUVH-E49865/2022     | EPI_ISL_1<br>3011188 | - | Hospital<br>Universitari Vall<br>dHebron - Vall<br>dHebron Institut<br>de Recerca | Hospital<br>Universitari Vall<br>dHebron - Vall<br>dHebron Institut<br>de Recerca                                                                     | Cristina Andr,àö-©s,<br>Maria Pi,àö-±ana,<br>Alejandra<br>Gonz,àö-∞lez-<br>S,àö-∞nchez, Damir<br>Garcia-Cehic, Ariadna<br>Rando, Juliana<br>Esperalba, Maria<br>Gema Codina, Carla<br>Castillo, Karen<br>Garc,àö,âta, Rodrigo<br>V,àö-∞squez, Maria<br>Carmen Martin,<br>Tom,àö,Âts Pumarola,<br>Josep Quer,<br>Andr,àö-©s<br>Ant,àö,â•n |
| hCoV-19/Spain/CT-<br>HUJT-RB32622/2022    | EPI_ISL_1<br>2732723 | - | Hospital<br>Universitari Dr.<br>Josep Trueta                                      | Institut<br>dInvestigaci,àö,â<br>•<br>Biom,àö-Ædica<br>de Girona  <br>Hospital<br>Universitari Dr.<br>Josep Trueta                                    | Mel-¨,àëlina Pinsach,<br>Bernat del Olmo,<br>Nuria Esther Neto,<br>Meritxell Deulofeu,<br>Paula Costa                                                                                                                                                                                                                                    |
| hCoV-19/Spain/CT-<br>HUJT-RB32591/2022    | EPI_ISL_1<br>2729223 | - | Hospital<br>Universitari Dr.<br>Josep Trueta                                      | Institut<br>dInvestigaci,àö,â<br>•<br>Biom,àö-Ædica<br>de Girona  <br>Hospital<br>Universitari Dr.<br>Josep Trueta                                    | Mel-¨,àëlina Pinsach,<br>Bernat del Olmo,<br>Nuria Esther Neto,<br>Meritxell Deulofeu,<br>Paula Costa                                                                                                                                                                                                                                    |
| hCoV-19/Spain/CT-<br>HUJT-RB32345/2022    | EPI_ISL_1<br>2155204 | - | Hospital<br>Universitari Dr.<br>Josep Trueta                                      | Institut<br>dInvestigaci,àö,â<br>•<br>Biom,àö-Ædica<br>de Girona  <br>Hospital<br>Universitari Dr.<br>Josep Trueta                                    | Mel-¨,àëlina Pinsach,<br>Bernat del Olmo,<br>Nuria Esther Neto,<br>Meritxell Deulofeu,<br>Paula Costa                                                                                                                                                                                                                                    |
| hCoV-<br>19/SouthKorea/KDCA8<br>7112/2022 | EPI_ISL_1<br>3738876 | - | Division of<br>Emerging<br>Infectious                                             | Division of<br>Emerging<br>Infectious                                                                                                                 | Jeong-Ah Kim, Ae<br>Kyung Park, Il-Hwan<br>Kim, Chae Young Lee,                                                                                                                                                                                                                                                                          |

|                                           |                      |              |                                                                                                                                                                         |                                                                                                                                                                         |                                                                                                  |
|-------------------------------------------|----------------------|--------------|-------------------------------------------------------------------------------------------------------------------------------------------------------------------------|-------------------------------------------------------------------------------------------------------------------------------------------------------------------------|--------------------------------------------------------------------------------------------------|
|                                           |                      |              | Diseases,<br>Bureau of<br>Infectious<br>Diseases<br>Diagnosis<br>Control, Korea<br>Disease Control<br>and Prevention<br>Agency                                          | Diseases,<br>Bureau of<br>Infectious<br>Diseases<br>Diagnosis<br>Control, Korea<br>Disease Control<br>and Prevention<br>Agency                                          | Hyuck Jin Lee, Eun-Jin<br>Kim                                                                    |
| hCoV-<br>19/SouthKorea/KDCA8<br>7038/2022 | EPI_ISL_1<br>3738825 | -            | Division of<br>Emerging<br>Infectious<br>Diseases,<br>Bureau of<br>Infectious<br>Diseases<br>Diagnosis<br>Control, Korea<br>Disease Control<br>and Prevention<br>Agency | Division of<br>Emerging<br>Infectious<br>Diseases,<br>Bureau of<br>Infectious<br>Diseases<br>Diagnosis<br>Control, Korea<br>Disease Control<br>and Prevention<br>Agency | Jeong-Ah Kim, Ae<br>Kyung Park, Il-Hwan<br>Kim, Chae Young Lee,<br>Hyuck Jin Lee, Eun-Jin<br>Kim |
| hCoV-<br>19/SouthKorea/KDCA8<br>6943/2022 | EPI_ISL_1<br>3738759 | -            | Division of<br>Emerging<br>Infectious<br>Diseases,<br>Bureau of<br>Infectious<br>Diseases<br>Diagnosis<br>Control, Korea<br>Disease Control<br>and Prevention<br>Agency | Division of<br>Emerging<br>Infectious<br>Diseases,<br>Bureau of<br>Infectious<br>Diseases<br>Diagnosis<br>Control, Korea<br>Disease Control<br>and Prevention<br>Agency | Jeong-Ah Kim, Ae<br>Kyung Park, Il-Hwan<br>Kim, Chae Young Lee,<br>Hyuck Jin Lee, Eun-Jin<br>Kim |
| hCoV-<br>19/SouthKorea/KDCA4<br>1183/2022 | EPI_ISL_1<br>2681044 | -            | Division of<br>Emerging<br>Infectious<br>Diseases,<br>Bureau of<br>Infectious<br>Diseases<br>Diagnosis<br>Control, Korea<br>Disease Control<br>and Prevention<br>Agency | Division of<br>Emerging<br>Infectious<br>Diseases,<br>Bureau of<br>Infectious<br>Diseases<br>Diagnosis<br>Control, Korea<br>Disease Control<br>and Prevention<br>Agency | Jeong-Ah Kim, Ae<br>Kyung Park, Il-Hwan<br>Kim, Chae Young Lee,<br>Hyuck Jin Lee, Eun-Jin<br>Kim |
| SouthAfrica/NHLS-UCT-<br>GS-9911/2021     | EPI_ISL_1<br>534389  | OM73960<br>4 | -                                                                                                                                                                       | -                                                                                                                                                                       | Viana et al                                                                                      |
| SouthAfrica/NHLS-UCT-<br>GS-7980/2020     | -                    | OM73937<br>2 | -                                                                                                                                                                       | -                                                                                                                                                                       | Viana et al                                                                                      |
| hCoV-19/Slovenia/17-<br>000037-NG/2022    | EPI_ISL_1<br>3179066 | -            | National<br>Laboratory for<br>Health,                                                                                                                                   | NLZOH (National<br>Laboratory for<br>Health,                                                                                                                            | Sandra Janezic,<br>Aleksander Mahnic,<br>Maja Rupnik,                                            |

|                             |                   |          |                                                                                                          |                                                                            |                                                                                                                                                                                                                                       |
|-----------------------------|-------------------|----------|----------------------------------------------------------------------------------------------------------|----------------------------------------------------------------------------|---------------------------------------------------------------------------------------------------------------------------------------------------------------------------------------------------------------------------------------|
|                             |                   |          | Environment and Food, OMM, Nova Gorica                                                                   | Environment and Food)                                                      | Tja,ââa ,ââohar<br>Äretnik, Alenka<br>,âÄtorman, Nika<br>Gobec, Kaja Tominc,<br>Ma,ââa<br>JarÄBiÄ, Leon<br>MariÄ, Sabina<br>Mlakar, Ur,ââka<br>Dobovi,ââek, Tanja<br>VrabiÄ, Barbara<br>Hrast, Eva LoziÄ |
| hCoV-19/Singapore/7131/2022 | EPI_ISL_1 3500375 | -        | National Public Health Laboratory, National Centre for Infectious Diseases                               | National Public Health Laboratory, National Centre for Infectious Diseases | Yichen Ding, Grace Ngan, Benny Yeo, Zhenyang Zhou, Royce Ang, Samuel Loo, Lin Cui, Raymond Tzer Pin Lin                                                                                                                               |
| hCoV-19/Singapore/6766/2022 | EPI_ISL_1 3360359 | -        | National Public Health Laboratory, National Centre for Infectious Diseases                               | National Public Health Laboratory, National Centre for Infectious Diseases | Grace Ngan, Yichen Ding, Benny Yeo, Zhenyang Zhou, Royce Ang, Samuel Loo, BeiBei Chen, Jesslin Tan, Chen Shi Ling, Lin Cui, Raymond Tzer Pin Lin                                                                                      |
| hCoV-19/Singapore/6077/2022 | EPI_ISL_1 3150658 | -        | National Public Health Laboratory, National Centre for Infectious Diseases                               | National Public Health Laboratory, National Centre for Infectious Diseases | Yichen Ding, Grace Ngan, Benny Yeo, Zhenyang Zhou, Royce Ang, Samuel Loo, Lin Cui, Raymond Tzer Pin Lin                                                                                                                               |
| hCoV-19/Singapore/5411/2022 | EPI_ISL_1 2870468 | -        | National Public Health Laboratory, National Centre for Infectious Diseases                               | National Public Health Laboratory, National Centre for Infectious Diseases | Grace Ngan, Yichen Ding, Benny Yeo, Zhenyang Zhou, Royce Ang, Samuel Loo, BeiBei Chen, Jesslin Tan, Chen Shi Ling, Lin Cui, Raymond Tzer Pin Lin                                                                                      |
| Scotland/QEUA-CC36A1/2020   | EPI_ISL_8 59182   | OD936389 | Lighthouse Lab in Glasgow                                                                                | Wellcome Sanger Institute                                                  | VanSteenhouse et al                                                                                                                                                                                                                   |
| Scotland/QEUA-9CEAF8/2020   | EPI_ISL_6 01930   | OA999808 | Lighthouse Lab in Glasgow                                                                                | Wellcome Sanger Institute                                                  | VanSteenhouse et al                                                                                                                                                                                                                   |
| Scotland/GCVR-170F3A/2020   | EPI_ISL_4 89684   | OA966278 | NHSGGC West of Scotland Specialist Virology Centre / MRC-University of Glasgow Centre for Virus Research | Wellcome Sanger Institute                                                  | da Silva Filipe et al                                                                                                                                                                                                                 |



|                                       |                     |                              |                                          |                                                                                                                                                                                                                                                                                                                                                                                                                                                                                                                                                                      |
|---------------------------------------|---------------------|------------------------------|------------------------------------------|----------------------------------------------------------------------------------------------------------------------------------------------------------------------------------------------------------------------------------------------------------------------------------------------------------------------------------------------------------------------------------------------------------------------------------------------------------------------------------------------------------------------------------------------------------------------|
| hCoV-19/Philippines/PH-RITM-1514/2022 | EPI_ISL_1 - 3355243 | FIRST AIDE DIAGNOSTIC CENTER | Research Institute for Tropical Medicine | Francisco Gerardo M. Polotan, Gerald Ivan S. Sotelo, Ardiane Ysabelle M. Dolor, Anne Pauline A. Alpino, Jefferson Earl J. Halog, Othoniel Jan T. Onza, Ma. Angelica A. Tujan, Amalea Dulcene D. Nicolasora, Joy Mariette L. Pararay, Criselda T. Bautista, Vina Lea F. Arguelles, Alexander Sadiasa, Catalino S. Demetria, Dodge R. Lim, Angela Kae T. Chang, Ma. Ricci R. Gomez, Claudette Lee S. Navarro, Charalyn Babida, Lei Lanna M. Dancel, Mayan Uy-Lumandas, Timothy John R. Dizon, Kirstyn Brunker, Katie Hampson, Yao-Tsun Li, Simon Daldry, Joseph Hughes |
| hCoV-19/Philippines/PH-RITM-1513/2022 | EPI_ISL_1 - 3355242 | FIRST AIDE DIAGNOSTIC CENTER | Research Institute for Tropical Medicine | Francisco Gerardo M. Polotan, Gerald Ivan S. Sotelo, Ardiane Ysabelle M. Dolor, Anne Pauline A. Alpino, Jefferson Earl J. Halog, Othoniel Jan T. Onza, Ma. Angelica A. Tujan, Amalea Dulcene D. Nicolasora, Joy Mariette L. Pararay, Criselda T. Bautista, Vina Lea F. Arguelles, Alexander Sadiasa, Catalino S. Demetria, Dodge R. Lim, Angela Kae T. Chang, Ma. Ricci R. Gomez, Claudette Lee S. Navarro, Charalyn Babida, Lei Lanna M. Dancel, Mayan Uy-Lumandas, Timothy John R. Dizon, Kirstyn                                                                  |

|                                               |                      |          |                                                                                                                                    |                                                                                                                                    |                                                                                                                                                                                                                                                                                                                                                                                                                                                                                                                                                                                                                                                         |
|-----------------------------------------------|----------------------|----------|------------------------------------------------------------------------------------------------------------------------------------|------------------------------------------------------------------------------------------------------------------------------------|---------------------------------------------------------------------------------------------------------------------------------------------------------------------------------------------------------------------------------------------------------------------------------------------------------------------------------------------------------------------------------------------------------------------------------------------------------------------------------------------------------------------------------------------------------------------------------------------------------------------------------------------------------|
|                                               |                      |          |                                                                                                                                    |                                                                                                                                    | Brunker, Katie<br>Hampson, Yao-Tsun Li,<br>Simon Daldry, Joseph<br>Hughes                                                                                                                                                                                                                                                                                                                                                                                                                                                                                                                                                                               |
| hCoV-<br>19/Philippines/PH-<br>RITM-1449/2022 | EPI_ISL_1<br>3137120 | -        | Chinese General<br>Hospital                                                                                                        | Research<br>Institute for<br>Tropical<br>Medicine                                                                                  | Francisco Gerardo M.<br>Polotan, Gerald Ivan S.<br>Sotelo, Ardiane<br>Ysabelle M. Dolor,<br>Anne Pauline A.<br>Alpino, Jefferson Earl<br>J. Halog, Othoniel Jan<br>T. Onza, Ma. Angelica<br>A. Tujan, Amalea<br>Dulcene D. Nicolasora,<br>Joy Mariette L.<br>Parayray, Criselda T.<br>Bautista, Vina Lea F.<br>Arguelles, Alexander<br>Sadiasa, Catalino S.<br>Demetria, Dodge R.<br>Lim, Angela Kae T.<br>Chang, Ma. Ricci R.<br>Gomez, Claudette Lee<br>S. Navarro, Charalyn<br>Babida, Lei Lanna M.<br>Dancel, Mayan Uy-<br>Lumandas, Timothy<br>John R. Dizon, Kirstyn<br>Brunker, Katie<br>Hampson, Yao-Tsun Li,<br>Simon Daldry, Joseph<br>Hughes |
| OX234701                                      | -                    | OX234701 | -                                                                                                                                  | -                                                                                                                                  | VanSteenhouse et al                                                                                                                                                                                                                                                                                                                                                                                                                                                                                                                                                                                                                                     |
| OX231175                                      | -                    | OX231175 | -                                                                                                                                  | -                                                                                                                                  | Fraser et al                                                                                                                                                                                                                                                                                                                                                                                                                                                                                                                                                                                                                                            |
| OX225154                                      | -                    | OX225154 | -                                                                                                                                  | -                                                                                                                                  | Danish Covid-19<br>Genome et al                                                                                                                                                                                                                                                                                                                                                                                                                                                                                                                                                                                                                         |
| OX212176                                      | -                    | OX212176 | -                                                                                                                                  | -                                                                                                                                  | Danish Covid-19<br>Genome et al                                                                                                                                                                                                                                                                                                                                                                                                                                                                                                                                                                                                                         |
| OX148100                                      | -                    | OX148100 | West of<br>Scotland<br>Specialist<br>Virology Centre,<br>NHSGGC / MRC-<br>University of<br>Glasgow Centre<br>for Virus<br>Research | West of<br>Scotland<br>Specialist<br>Virology Centre,<br>NHSGGC / MRC-<br>University of<br>Glasgow Centre<br>for Virus<br>Research | -                                                                                                                                                                                                                                                                                                                                                                                                                                                                                                                                                                                                                                                       |
| OX148045                                      | -                    | OX148045 | West of<br>Scotland<br>Specialist<br>Virology Centre,<br>NHSGGC / MRC-                                                             | West of<br>Scotland<br>Specialist<br>Virology Centre,<br>NHSGGC / MRC-                                                             | -                                                                                                                                                                                                                                                                                                                                                                                                                                                                                                                                                                                                                                                       |

|          |   |              |                                                                                                                                    |                                                                                                                            |   |
|----------|---|--------------|------------------------------------------------------------------------------------------------------------------------------------|----------------------------------------------------------------------------------------------------------------------------|---|
|          |   |              | University of<br>Glasgow Centre<br>for Virus<br>Research                                                                           | University of<br>Glasgow Centre<br>for Virus<br>Research                                                                   |   |
| OX115932 | - | OX115932     | Universitätsklini-<br>kum Heidelberg,<br>Im<br>Neuenheimer<br>Feld 324; 69120<br>Heidelberg                                        | Robert Koch<br>Institute                                                                                                   | - |
| OX071736 | - | OX071736     | West of<br>Scotland<br>Specialist<br>Virology Centre,<br>NHSGGC / MRC-<br>University of<br>Glasgow Centre<br>for Virus<br>Research | West of<br>Scotland<br>Specialist<br>Virology Centre,<br>NHSGGC / MRC-<br>University of<br>Glasgow Centre<br>for Virus Res | - |
| OW908683 | - | OW90868<br>3 | Sonic -<br>Bioscientia -<br>MVZ Labor Saar<br>GmbH, Otto-<br>Kaiser-Strasse<br>8a; 66386 St.<br>Ingbert                            | Robert Koch<br>Institute                                                                                                   | - |
| OW875123 | - | OW87512<br>3 | Bioscientia<br>Labor<br>Wermsdorf, Am<br>Fasanenholz 31;<br>04779<br>Wermsdorf                                                     | Robert Koch<br>Institute                                                                                                   | - |
| OW858367 | - | OW85836<br>7 | Bioscientia<br>Labor<br>Wermsdorf, Am<br>Fasanenholz 31;<br>04779<br>Wermsdorf                                                     | Robert Koch<br>Institute                                                                                                   | - |
| OW798735 | - | OW79873<br>5 | Eurofins MVZ<br>Labor<br>Gelsenkirchen,<br>Rotthausen<br>Strasse 19;<br>44879<br>Gelsenkirchen                                     | Robert Koch<br>Institute                                                                                                   | - |
| OW790686 | - | OW79068<br>6 | MVZ Labor<br>Krone GbR,<br>Siemensstrasse<br>40; 32105 Bad<br>Salzungen                                                            | Robert Koch<br>Institute                                                                                                   | - |
| OW720062 | - | OW72006<br>2 | Medizinisch-<br>Diagnostisches                                                                                                     | Robert Koch<br>Institute                                                                                                   | - |

|          |   |          |                                                                                                                                                                                                                                                                        |                                                                                                                                                                                                                                                                        |   |
|----------|---|----------|------------------------------------------------------------------------------------------------------------------------------------------------------------------------------------------------------------------------------------------------------------------------|------------------------------------------------------------------------------------------------------------------------------------------------------------------------------------------------------------------------------------------------------------------------|---|
|          |   |          | Labor Kempten<br>allg.Ärztulab,<br>Augartenweg<br>20; 87435<br>Kempten                                                                                                                                                                                                 |                                                                                                                                                                                                                                                                        |   |
| OW660369 | - | OW660369 | Sonic -<br>Bioscientia -<br>MVZ Labor Saar<br>GmbH, Otto-<br>Kaiser-Straße<br>8a; 66386 St.<br>Ingbert                                                                                                                                                                 | Robert Koch<br>Institute                                                                                                                                                                                                                                               | - |
| OW643530 | - | OW643530 | Limbach - MVZ<br>Labor Dr.<br>Volkman &<br>Kollegen,<br>Gerwigstr. 67;<br>76131 Karlsruhe                                                                                                                                                                              | Robert Koch<br>Institute                                                                                                                                                                                                                                               | - |
| OW406425 | - | OW406425 | Northumbria<br>University /<br>South Tees<br>Hospitals NHS<br>Foundation<br>Trust / North<br>Cumbria<br>Integrated Care<br>NHS Foundation<br>Trust / North<br>Tees and<br>Hartlepool NHS<br>Foundation<br>Trust /<br>Newcastle<br>Hospitals NHS<br>Foundation<br>Trust | Northumbria<br>University /<br>South Tees<br>Hospitals NHS<br>Foundation<br>Trust / North<br>Cumbria<br>Integrated Care<br>NHS Foundation<br>Trust / North<br>Tees and<br>Hartlepool NHS<br>Foundation<br>Trust /<br>Newcastle<br>Hospitals NHS<br>Foundation<br>Trust | - |
| OW309946 | - | OW309946 | Bioscientia<br>Labor<br>Wermsdorf, Am<br>Fasanenholz 31;<br>04779<br>Wermsdorf                                                                                                                                                                                         | Robert Koch<br>Institute                                                                                                                                                                                                                                               | - |
| OW300612 | - | OW300612 | Labor Blackholm<br>MVZ,<br>Bahnhofstraße<br>14; 74072<br>Heilbronn                                                                                                                                                                                                     | Robert Koch<br>Institute                                                                                                                                                                                                                                               | - |
| OU964702 | - | OU964702 | Universitätsklini-<br>kum Köln;<br>Institut für<br>Virologie, Fürst-<br>Pückler-Str. 56;                                                                                                                                                                               | Robert Koch<br>Institute                                                                                                                                                                                                                                               | - |

| 50935 Köln |                     |          |                                                                              |                                                                              |   |
|------------|---------------------|----------|------------------------------------------------------------------------------|------------------------------------------------------------------------------|---|
| OU809683   | -                   | OU809683 | Wellcome Sanger Institute                                                    | Wellcome Sanger Institute                                                    | - |
| OU399240   | -                   | OU399240 | MVZ Labor Krone GbR, Siemensstraße 40; 32105 Bad Salzuflen                   | Robert Koch Institute                                                        | - |
| OU399129   | -                   | OU399129 | Medizinische Laboratorien Düsseldorf, Nordstr. 44; 40477 Düsseldorf          | Robert Koch Institute                                                        | - |
| OU399015   | -                   | OU399015 | Labor Dr. Heidrich & Kollegen MVZ GmbH Hamburg, Klinikweg 23; 22081 Hamburg  | Robert Koch Institute                                                        | - |
| OU370312   | -                   | OU370312 | Eurofins LifeCodexx GmbH, Line-Eid-Strasse 3; 78467 Konstanz                 | Robert Koch Institute                                                        | - |
| OU367659   | -                   | OU367659 | Eurofins LifeCodexx GmbH, Line-Eid-Strasse 3; 78467 Konstanz                 | Robert Koch Institute                                                        | - |
| OU348130   | EPI_ISL_2<br>238866 | OU348130 | Queens Medical Centre, Clinical Microbiology Department / DeepSeq Nottingham | Queens Medical Centre, Clinical Microbiology Department / DeepSeq Nottingham | - |
| OU327584   | -                   | OU327584 | Gyncentrum, Sosnowiec, Poland                                                | COVID-HUB-PL                                                                 | - |
| OU200398   | -                   | OU200398 | Laborarztpraxis Osnabrück, Rostocker Straße 5-7; 49124 Georgsmarienhütte     | Robert Koch Institute                                                        | - |
| OU157897   | -                   | OU157897 | SYNLAB MVZ Leverkusen, Paracelsusstraße 13; 51375 Leverkusen                 | Robert Koch Institute                                                        | - |

|                                  |                  |          |                                                                                                                      |                                                       |                                                                                                                                                                            |
|----------------------------------|------------------|----------|----------------------------------------------------------------------------------------------------------------------|-------------------------------------------------------|----------------------------------------------------------------------------------------------------------------------------------------------------------------------------|
| OU155712                         | -                | OU155712 | Centogene; Dr. Bauer Laboratoriums GmbH, Am Strande 7; 18055 Rostock                                                 | Robert Koch Institute                                 | -                                                                                                                                                                          |
| OU134994                         | -                | OU134994 | MVZ für Laboratoriumsmedizin und Mikrobiologie Koblenz-Mittelrhein (Labor Koblenz), Viktoriastraße 39; 56068 Koblenz | Robert Koch Institute                                 | -                                                                                                                                                                          |
| OU116859                         | -                | OU116859 | Limbach - MVZ Humangenetik Ulm, Karlstraße 31; 89073 Ulm                                                             | Robert Koch Institute                                 | -                                                                                                                                                                          |
| OU112926                         | -                | OU112926 | Sonic - Labor Dr. von Froreich GmbH, Großmoorbogen 25; 21079 Hamburg                                                 | Robert Koch Institute                                 | -                                                                                                                                                                          |
| OU109095                         | -                | OU109095 | SYNLAB MVZ Leverkusen, 51371 Leverkusen                                                                              | Robert Koch Institute                                 | -                                                                                                                                                                          |
| OU085785                         | -                | OU085785 | Labor Dr. Wisplinghoff - Köln, 50667 Köln                                                                            | Robert Koch Institute                                 | -                                                                                                                                                                          |
| OU077744                         | -                | OU077744 | MVZ Labor Krone GbR, Siemensstraße 40; 32105 Bad Salzuflen                                                           | Robert Koch Institute                                 | -                                                                                                                                                                          |
| OU076529                         | -                | OU076529 | amedes MVZ Hannover, 30159 Hannover                                                                                  | Robert Koch Institute                                 | -                                                                                                                                                                          |
| NGA/BCVL-24423/2021              | EPI_ISL_4026500  | OL601832 | -                                                                                                                    | -                                                     | Lorenzo-Redondo et al                                                                                                                                                      |
| hCoV-19/NewZealand/22CV5528/2022 | EPI_ISL_13437154 | -        | Wellington SCL (WN)                                                                                                  | Institute of Environmental Science and Research (ESR) | Sarah Cockerton, Clare Gebbie, Dhanisha Patel, Rachel Boyle, SallyAnn Harbison, Olivia Stroeven, Xiaoyun Ren, Matt Storey, Nikki Freed, Muhammad Faisal, Jing Wang, Hermes |

|                      |                      |              |                                                                   |                                           |                                                                                                                                                                                                                                                                                                                                                                                                                                                                                                                                                                                                                                                                                |
|----------------------|----------------------|--------------|-------------------------------------------------------------------|-------------------------------------------|--------------------------------------------------------------------------------------------------------------------------------------------------------------------------------------------------------------------------------------------------------------------------------------------------------------------------------------------------------------------------------------------------------------------------------------------------------------------------------------------------------------------------------------------------------------------------------------------------------------------------------------------------------------------------------|
|                      |                      |              |                                                                   |                                           | Perez, Anja Werno,<br>Antje van der Linden,<br>Arlo Upton, Chris<br>Mansell, David<br>Hammer, Dragana<br>Drinkovic, Gary<br>McAuliffe, Hana Sofia<br>Andersson, James<br>Ussher, Jill Sherwood,<br>Josh Freeman, Julia<br>Howard, Juliet Elvy,<br>Mary DeAlmeida, Matt<br>Blakiston, Matthew<br>Rogers, Max<br>Bloomfield, Michael<br>Addidle, Michelle<br>Balm, Sally Roberts,<br>Sarah Jefferies,<br>Sharmini Muttaiyah,<br>Susan Morpeth, Susan<br>Taylor, Timothy<br>Blackmore, Vani<br>Sathyendran, Veronica<br>Playle, Virginia Hope,<br>Erasmus Smit, Lauren<br>Jelly, Olin Silander,<br>Ana Claasen, Subin<br>Jeon, Amy Bradhsaw,<br>Bethany Forsythe,<br>Joep de Ligt |
| MEX/CMX-27/2020      | EPI_ISL_1<br>301720  | OK435569     | -                                                                 | -                                         | Taboada et al                                                                                                                                                                                                                                                                                                                                                                                                                                                                                                                                                                                                                                                                  |
| LR992024             | -                    | LR992024     | WSSE                                                              | COVID-HUB-PL                              | -                                                                                                                                                                                                                                                                                                                                                                                                                                                                                                                                                                                                                                                                              |
| LR883998             | EPI_ISL_5<br>29974   | LR883998     | Hospital<br>Universitario12<br>de Octubre                         | HOSPITAL<br>UNIVERSITARY<br>12 DE OCTUBRE | Viedma et al                                                                                                                                                                                                                                                                                                                                                                                                                                                                                                                                                                                                                                                                   |
| Lebanon/QIB-387/2021 | -                    | OU606942     | Laboratory of<br>Molecular<br>Biology and<br>Cancer<br>Immunology | Quadram<br>Institute<br>Bioscience        | Tiwari et al                                                                                                                                                                                                                                                                                                                                                                                                                                                                                                                                                                                                                                                                   |
| Lebanon/QIB-242/2021 | -                    | OU604978     | Laboratory of<br>Molecular<br>Biology and<br>Cancer<br>Immunology | Quadram<br>Institute<br>Bioscience        | Tiwari et al                                                                                                                                                                                                                                                                                                                                                                                                                                                                                                                                                                                                                                                                   |
| LC655331             | -                    | LC655331     | -                                                                 | -                                         | Haga et al                                                                                                                                                                                                                                                                                                                                                                                                                                                                                                                                                                                                                                                                     |
| KEN/SS2109/2021      | EPI_ISL_4<br>197086  | OK258401     | -                                                                 | -                                         | Githinji et al                                                                                                                                                                                                                                                                                                                                                                                                                                                                                                                                                                                                                                                                 |
| JPN/HiroHC119c/2020  | EPI_ISL_1<br>0957440 | OM97838<br>2 | -                                                                 | -                                         | Kurose et al                                                                                                                                                                                                                                                                                                                                                                                                                                                                                                                                                                                                                                                                   |

|                                |                      |   |                                                                    |                                                                     |                                                                                                                                                                                    |
|--------------------------------|----------------------|---|--------------------------------------------------------------------|---------------------------------------------------------------------|------------------------------------------------------------------------------------------------------------------------------------------------------------------------------------|
| hCoV-19/Japan/TKYkkm22218/2022 | EPI_ISL_1<br>3293135 | - | Tokyo Metropolitan Institute of Public Health                      | Tokyo Metropolitan Institute of Public Health                       | Akane Negishi, Sachiko Harada, Ryota Kumagai, Ai Suzuki, Fumi Kasuya, Kenshiro Kuroki, Arisa Amano, Maya Isogai, Takushi Fujiwara, Hirofumi Miyake, Mami Nagashima, Kenji Sadamasu |
| hCoV-19/Japan/IC-9966/2022     | EPI_ISL_1<br>3027315 | - | SARS-CoV-2 testing team, National Institute of Infectious Diseases | Pathogen Genomics Center, National Institute of Infectious Diseases | Tsuyoshi Sekizuka, Kentaro Itokawa, Rina Tanaka, Masanori Hashino, Nozomu Hanaoka, Masumichi Saito, Naomi Nojiri, Hazuka Y Furihata, Tsuguto Fujimoto, Makoto Kuroda               |
| hCoV-19/Japan/IC-9926/2022     | EPI_ISL_1<br>3027290 | - | SARS-CoV-2 testing team, National Institute of Infectious Diseases | Pathogen Genomics Center, National Institute of Infectious Diseases | Tsuyoshi Sekizuka, Kentaro Itokawa, Rina Tanaka, Masanori Hashino, Nozomu Hanaoka, Masumichi Saito, Naomi Nojiri, Hazuka Y Furihata, Tsuguto Fujimoto, Makoto Kuroda               |
| hCoV-19/Japan/IC-9869/2022     | EPI_ISL_1<br>3027249 | - | SARS-CoV-2 testing team, National Institute of Infectious Diseases | Pathogen Genomics Center, National Institute of Infectious Diseases | Tsuyoshi Sekizuka, Kentaro Itokawa, Rina Tanaka, Masanori Hashino, Nozomu Hanaoka, Masumichi Saito, Naomi Nojiri, Hazuka Y Furihata, Tsuguto Fujimoto, Makoto Kuroda               |
| hCoV-19/Japan/IC-9818/2022     | EPI_ISL_1<br>3027221 | - | SARS-CoV-2 testing team, National Institute of Infectious Diseases | Pathogen Genomics Center, National Institute of Infectious Diseases | Tsuyoshi Sekizuka, Kentaro Itokawa, Rina Tanaka, Masanori Hashino, Nozomu Hanaoka, Masumichi Saito, Naomi Nojiri, Hazuka Y Furihata, Tsuguto Fujimoto, Makoto Kuroda               |
| hCoV-19/Japan/IC-9785/2022     | EPI_ISL_1<br>3027192 | - | SARS-CoV-2 testing team, National Institute of Infectious Diseases | Pathogen Genomics Center, National Institute of Infectious Diseases | Tsuyoshi Sekizuka, Kentaro Itokawa, Rina Tanaka, Masanori Hashino, Nozomu Hanaoka, Masumichi Saito, Naomi Nojiri,                                                                  |



|                            |                      |   |                                                                                   |                                                                                    |                                                                                                                                                                                              |
|----------------------------|----------------------|---|-----------------------------------------------------------------------------------|------------------------------------------------------------------------------------|----------------------------------------------------------------------------------------------------------------------------------------------------------------------------------------------|
|                            |                      |   |                                                                                   |                                                                                    | Hazuka Y Furihata,<br>Tsuguto Fujimoto,<br>Makoto Kuroda                                                                                                                                     |
| hCoV-19/Japan/IC-9613/2022 | EPI_ISL_1<br>3027064 | - | SARS-CoV-2<br>testing team,<br>National<br>Institute of<br>Infectious<br>Diseases | Pathogen<br>Genomics<br>Center, National<br>Institute of<br>Infectious<br>Diseases | Tsuyoshi Sekizuka,<br>Kentaro Itokawa, Rina<br>Tanaka, Masanori<br>Hashino, Nozomu<br>Hanaoka, Masumichi<br>Saito, Naomi Nojiri,<br>Hazuka Y Furihata,<br>Tsuguto Fujimoto,<br>Makoto Kuroda |
| hCoV-19/Japan/IC-9571/2022 | EPI_ISL_1<br>3027035 | - | SARS-CoV-2<br>testing team,<br>National<br>Institute of<br>Infectious<br>Diseases | Pathogen<br>Genomics<br>Center, National<br>Institute of<br>Infectious<br>Diseases | Tsuyoshi Sekizuka,<br>Kentaro Itokawa, Rina<br>Tanaka, Masanori<br>Hashino, Nozomu<br>Hanaoka, Masumichi<br>Saito, Naomi Nojiri,<br>Hazuka Y Furihata,<br>Tsuguto Fujimoto,<br>Makoto Kuroda |
| hCoV-19/Japan/IC-9477/2022 | EPI_ISL_1<br>3026960 | - | SARS-CoV-2<br>testing team,<br>National<br>Institute of<br>Infectious<br>Diseases | Pathogen<br>Genomics<br>Center, National<br>Institute of<br>Infectious<br>Diseases | Tsuyoshi Sekizuka,<br>Kentaro Itokawa, Rina<br>Tanaka, Masanori<br>Hashino, Nozomu<br>Hanaoka, Masumichi<br>Saito, Naomi Nojiri,<br>Hazuka Y Furihata,<br>Tsuguto Fujimoto,<br>Makoto Kuroda |
| hCoV-19/Japan/IC-9428/2022 | EPI_ISL_1<br>3026918 | - | SARS-CoV-2<br>testing team,<br>National<br>Institute of<br>Infectious<br>Diseases | Pathogen<br>Genomics<br>Center, National<br>Institute of<br>Infectious<br>Diseases | Tsuyoshi Sekizuka,<br>Kentaro Itokawa, Rina<br>Tanaka, Masanori<br>Hashino, Nozomu<br>Hanaoka, Masumichi<br>Saito, Naomi Nojiri,<br>Hazuka Y Furihata,<br>Tsuguto Fujimoto,<br>Makoto Kuroda |
| hCoV-19/Japan/IC-9246/2022 | EPI_ISL_1<br>2807034 | - | SARS-CoV-2<br>testing team,<br>National<br>Institute of<br>Infectious<br>Diseases | Pathogen<br>Genomics<br>Center, National<br>Institute of<br>Infectious<br>Diseases | Tsuyoshi Sekizuka,<br>Kentaro Itokawa, Rina<br>Tanaka, Masanori<br>Hashino, Nozomu<br>Hanaoka, Masumichi<br>Saito, Naomi Nojiri,<br>Hazuka Y Furihata,<br>Tsuguto Fujimoto,<br>Makoto Kuroda |
| hCoV-19/Japan/IC-9143/2022 | EPI_ISL_1<br>2806854 | - | SARS-CoV-2<br>testing team,<br>National<br>Institute of                           | Pathogen<br>Genomics<br>Center, National<br>Institute of                           | Tsuyoshi Sekizuka,<br>Kentaro Itokawa, Rina<br>Tanaka, Masanori<br>Hashino, Nozomu                                                                                                           |

|                             |                      |   |                                                                    |                                                                     |                                                                                                                                                                      |
|-----------------------------|----------------------|---|--------------------------------------------------------------------|---------------------------------------------------------------------|----------------------------------------------------------------------------------------------------------------------------------------------------------------------|
|                             |                      |   | Infectious Diseases                                                | Infectious Diseases                                                 | Hanaoka, Masumichi<br>Saito, Naomi Nojiri,<br>Hazuka Y Furihata,<br>Tsuguto Fujimoto,<br>Makoto Kuroda                                                               |
| hCoV-19/Japan/IC-9101/2022  | EPI_ISL_1<br>2806812 | - | SARS-CoV-2 testing team, National Institute of Infectious Diseases | Pathogen Genomics Center, National Institute of Infectious Diseases | Tsuyoshi Sekizuka, Kentaro Itokawa, Rina Tanaka, Masanori Hashino, Nozomu Hanaoka, Masumichi Saito, Naomi Nojiri, Hazuka Y Furihata, Tsuguto Fujimoto, Makoto Kuroda |
| hCoV-19/Japan/IC-8789/2022  | EPI_ISL_1<br>2724668 | - | SARS-CoV-2 testing team, National Institute of Infectious Diseases | Pathogen Genomics Center, National Institute of Infectious Diseases | Tsuyoshi Sekizuka, Kentaro Itokawa, Rina Tanaka, Masanori Hashino, Nozomu Hanaoka, Masumichi Saito, Naomi Nojiri, Hazuka Y Furihata, Tsuguto Fujimoto, Makoto Kuroda |
| hCoV-19/Japan/IC-7302/2022  | EPI_ISL_1<br>2096935 | - | SARS-CoV-2 testing team, National Institute of Infectious Diseases | Pathogen Genomics Center, National Institute of Infectious Diseases | Tsuyoshi Sekizuka, Kentaro Itokawa, Rina Tanaka, Masanori Hashino, Nozomu Hanaoka, Masumichi Saito, Naomi Nojiri, Hazuka Y Furihata, Tsuguto Fujimoto, Makoto Kuroda |
| hCoV-19/Japan/IC-7301/2022  | EPI_ISL_1<br>2096934 | - | SARS-CoV-2 testing team, National Institute of Infectious Diseases | Pathogen Genomics Center, National Institute of Infectious Diseases | Tsuyoshi Sekizuka, Kentaro Itokawa, Rina Tanaka, Masanori Hashino, Nozomu Hanaoka, Masumichi Saito, Naomi Nojiri, Hazuka Y Furihata, Tsuguto Fujimoto, Makoto Kuroda |
| hCoV-19/Japan/IC-11971/2022 | EPI_ISL_1<br>3565842 | - | SARS-CoV-2 testing team, National Institute of Infectious Diseases | Pathogen Genomics Center, National Institute of Infectious Diseases | Tsuyoshi Sekizuka, Kentaro Itokawa, Rina Tanaka, Masanori Hashino, Nozomu Hanaoka, Masumichi Saito, Naomi Nojiri, Hazuka Y Furihata, Tsuguto Fujimoto, Makoto Kuroda |
| hCoV-19/Japan/IC-11957/2022 | EPI_ISL_1<br>3565831 | - | SARS-CoV-2 testing team,                                           | Pathogen Genomics                                                   | Tsuyoshi Sekizuka, Kentaro Itokawa, Rina                                                                                                                             |

|                             |                      |   |                                                                    |                                                                     |                                                                                                                                                                                              |
|-----------------------------|----------------------|---|--------------------------------------------------------------------|---------------------------------------------------------------------|----------------------------------------------------------------------------------------------------------------------------------------------------------------------------------------------|
|                             |                      |   | National Institute of Infectious Diseases                          | Center, National Institute of Infectious Diseases                   | Tanaka, Masanori<br>Hashino, Nozomu<br>Hanaoka, Masumichi<br>Saito, Naomi Nojiri,<br>Hazuka Y Furihata,<br>Tsuguto Fujimoto,<br>Makoto Kuroda                                                |
| hCoV-19/Japan/IC-11956/2022 | EPI_ISL_1<br>3565830 | - | SARS-CoV-2 testing team, National Institute of Infectious Diseases | Pathogen Genomics Center, National Institute of Infectious Diseases | Tsuyoshi Sekizuka,<br>Kentaro Itokawa, Rina<br>Tanaka, Masanori<br>Hashino, Nozomu<br>Hanaoka, Masumichi<br>Saito, Naomi Nojiri,<br>Hazuka Y Furihata,<br>Tsuguto Fujimoto,<br>Makoto Kuroda |
| hCoV-19/Japan/IC-11819/2022 | EPI_ISL_1<br>3565725 | - | SARS-CoV-2 testing team, National Institute of Infectious Diseases | Pathogen Genomics Center, National Institute of Infectious Diseases | Tsuyoshi Sekizuka,<br>Kentaro Itokawa, Rina<br>Tanaka, Masanori<br>Hashino, Nozomu<br>Hanaoka, Masumichi<br>Saito, Naomi Nojiri,<br>Hazuka Y Furihata,<br>Tsuguto Fujimoto,<br>Makoto Kuroda |
| hCoV-19/Japan/IC-11818/2022 | EPI_ISL_1<br>3565724 | - | SARS-CoV-2 testing team, National Institute of Infectious Diseases | Pathogen Genomics Center, National Institute of Infectious Diseases | Tsuyoshi Sekizuka,<br>Kentaro Itokawa, Rina<br>Tanaka, Masanori<br>Hashino, Nozomu<br>Hanaoka, Masumichi<br>Saito, Naomi Nojiri,<br>Hazuka Y Furihata,<br>Tsuguto Fujimoto,<br>Makoto Kuroda |
| hCoV-19/Japan/IC-11817/2022 | EPI_ISL_1<br>3565723 | - | SARS-CoV-2 testing team, National Institute of Infectious Diseases | Pathogen Genomics Center, National Institute of Infectious Diseases | Tsuyoshi Sekizuka,<br>Kentaro Itokawa, Rina<br>Tanaka, Masanori<br>Hashino, Nozomu<br>Hanaoka, Masumichi<br>Saito, Naomi Nojiri,<br>Hazuka Y Furihata,<br>Tsuguto Fujimoto,<br>Makoto Kuroda |
| hCoV-19/Japan/IC-11816/2022 | EPI_ISL_1<br>3565722 | - | SARS-CoV-2 testing team, National Institute of Infectious Diseases | Pathogen Genomics Center, National Institute of Infectious Diseases | Tsuyoshi Sekizuka,<br>Kentaro Itokawa, Rina<br>Tanaka, Masanori<br>Hashino, Nozomu<br>Hanaoka, Masumichi<br>Saito, Naomi Nojiri,<br>Hazuka Y Furihata,<br>Tsuguto Fujimoto,<br>Makoto Kuroda |

|                             |                      |   |                                                                    |                                                                     |                                                                                                                                                                      |
|-----------------------------|----------------------|---|--------------------------------------------------------------------|---------------------------------------------------------------------|----------------------------------------------------------------------------------------------------------------------------------------------------------------------|
| hCoV-19/Japan/IC-11599/2022 | EPI_ISL_1<br>3565560 | - | SARS-CoV-2 testing team, National Institute of Infectious Diseases | Pathogen Genomics Center, National Institute of Infectious Diseases | Tsuyoshi Sekizuka, Kentaro Itokawa, Rina Tanaka, Masanori Hashino, Nozomu Hanaoka, Masumichi Saito, Naomi Nojiri, Hazuka Y Furihata, Tsuguto Fujimoto, Makoto Kuroda |
| hCoV-19/Japan/IC-11518/2022 | EPI_ISL_1<br>3565493 | - | SARS-CoV-2 testing team, National Institute of Infectious Diseases | Pathogen Genomics Center, National Institute of Infectious Diseases | Tsuyoshi Sekizuka, Kentaro Itokawa, Rina Tanaka, Masanori Hashino, Nozomu Hanaoka, Masumichi Saito, Naomi Nojiri, Hazuka Y Furihata, Tsuguto Fujimoto, Makoto Kuroda |
| hCoV-19/Japan/IC-11503/2022 | EPI_ISL_1<br>3565480 | - | SARS-CoV-2 testing team, National Institute of Infectious Diseases | Pathogen Genomics Center, National Institute of Infectious Diseases | Tsuyoshi Sekizuka, Kentaro Itokawa, Rina Tanaka, Masanori Hashino, Nozomu Hanaoka, Masumichi Saito, Naomi Nojiri, Hazuka Y Furihata, Tsuguto Fujimoto, Makoto Kuroda |
| hCoV-19/Japan/IC-11319/2022 | EPI_ISL_1<br>3217741 | - | SARS-CoV-2 testing team, National Institute of Infectious Diseases | Pathogen Genomics Center, National Institute of Infectious Diseases | Tsuyoshi Sekizuka, Kentaro Itokawa, Rina Tanaka, Masanori Hashino, Nozomu Hanaoka, Masumichi Saito, Naomi Nojiri, Hazuka Y Furihata, Tsuguto Fujimoto, Makoto Kuroda |
| hCoV-19/Japan/IC-11302/2022 | EPI_ISL_1<br>3217728 | - | SARS-CoV-2 testing team, National Institute of Infectious Diseases | Pathogen Genomics Center, National Institute of Infectious Diseases | Tsuyoshi Sekizuka, Kentaro Itokawa, Rina Tanaka, Masanori Hashino, Nozomu Hanaoka, Masumichi Saito, Naomi Nojiri, Hazuka Y Furihata, Tsuguto Fujimoto, Makoto Kuroda |
| hCoV-19/Japan/IC-11076/2022 | EPI_ISL_1<br>3217557 | - | SARS-CoV-2 testing team, National Institute of Infectious Diseases | Pathogen Genomics Center, National Institute of Infectious Diseases | Tsuyoshi Sekizuka, Kentaro Itokawa, Rina Tanaka, Masanori Hashino, Nozomu Hanaoka, Masumichi Saito, Naomi Nojiri, Hazuka Y Furihata,                                 |

|                             |                      |   |                                                                                   |                                                                                    |                                                                                                                                                                                              |
|-----------------------------|----------------------|---|-----------------------------------------------------------------------------------|------------------------------------------------------------------------------------|----------------------------------------------------------------------------------------------------------------------------------------------------------------------------------------------|
|                             |                      |   |                                                                                   |                                                                                    | Tsuguto Fujimoto,<br>Makoto Kuroda                                                                                                                                                           |
| hCoV-19/Japan/IC-11004/2022 | EPI_ISL_1<br>3217492 | - | SARS-CoV-2<br>testing team,<br>National<br>Institute of<br>Infectious<br>Diseases | Pathogen<br>Genomics<br>Center, National<br>Institute of<br>Infectious<br>Diseases | Tsuyoshi Sekizuka,<br>Kentaro Itokawa, Rina<br>Tanaka, Masanori<br>Hashino, Nozomu<br>Hanaoka, Masumichi<br>Saito, Naomi Nojiri,<br>Hazuka Y Furihata,<br>Tsuguto Fujimoto,<br>Makoto Kuroda |
| hCoV-19/Japan/IC-11003/2022 | EPI_ISL_1<br>3217491 | - | SARS-CoV-2<br>testing team,<br>National<br>Institute of<br>Infectious<br>Diseases | Pathogen<br>Genomics<br>Center, National<br>Institute of<br>Infectious<br>Diseases | Tsuyoshi Sekizuka,<br>Kentaro Itokawa, Rina<br>Tanaka, Masanori<br>Hashino, Nozomu<br>Hanaoka, Masumichi<br>Saito, Naomi Nojiri,<br>Hazuka Y Furihata,<br>Tsuguto Fujimoto,<br>Makoto Kuroda |
| hCoV-19/Japan/IC-10946/2022 | EPI_ISL_1<br>3217448 | - | SARS-CoV-2<br>testing team,<br>National<br>Institute of<br>Infectious<br>Diseases | Pathogen<br>Genomics<br>Center, National<br>Institute of<br>Infectious<br>Diseases | Tsuyoshi Sekizuka,<br>Kentaro Itokawa, Rina<br>Tanaka, Masanori<br>Hashino, Nozomu<br>Hanaoka, Masumichi<br>Saito, Naomi Nojiri,<br>Hazuka Y Furihata,<br>Tsuguto Fujimoto,<br>Makoto Kuroda |
| hCoV-19/Japan/IC-10933/2022 | EPI_ISL_1<br>3217439 | - | SARS-CoV-2<br>testing team,<br>National<br>Institute of<br>Infectious<br>Diseases | Pathogen<br>Genomics<br>Center, National<br>Institute of<br>Infectious<br>Diseases | Tsuyoshi Sekizuka,<br>Kentaro Itokawa, Rina<br>Tanaka, Masanori<br>Hashino, Nozomu<br>Hanaoka, Masumichi<br>Saito, Naomi Nojiri,<br>Hazuka Y Furihata,<br>Tsuguto Fujimoto,<br>Makoto Kuroda |
| hCoV-19/Japan/IC-10861/2022 | EPI_ISL_1<br>3217385 | - | SARS-CoV-2<br>testing team,<br>National<br>Institute of<br>Infectious<br>Diseases | Pathogen<br>Genomics<br>Center, National<br>Institute of<br>Infectious<br>Diseases | Tsuyoshi Sekizuka,<br>Kentaro Itokawa, Rina<br>Tanaka, Masanori<br>Hashino, Nozomu<br>Hanaoka, Masumichi<br>Saito, Naomi Nojiri,<br>Hazuka Y Furihata,<br>Tsuguto Fujimoto,<br>Makoto Kuroda |
| hCoV-19/Japan/IC-10855/2022 | EPI_ISL_1<br>3217381 | - | SARS-CoV-2<br>testing team,<br>National<br>Institute of<br>Infectious             | Pathogen<br>Genomics<br>Center, National<br>Institute of<br>Infectious             | Tsuyoshi Sekizuka,<br>Kentaro Itokawa, Rina<br>Tanaka, Masanori<br>Hashino, Nozomu<br>Hanaoka, Masumichi                                                                                     |

|                             |                      |   |                                                                                   |                                                                                    |                                                                                                                                                                                              |
|-----------------------------|----------------------|---|-----------------------------------------------------------------------------------|------------------------------------------------------------------------------------|----------------------------------------------------------------------------------------------------------------------------------------------------------------------------------------------|
|                             |                      |   | Diseases                                                                          | Diseases                                                                           | Saito, Naomi Nojiri,<br>Hazuka Y Furihata,<br>Tsuguto Fujimoto,<br>Makoto Kuroda                                                                                                             |
| hCoV-19/Japan/IC-10669/2022 | EPI_ISL_1<br>3167924 | - | SARS-CoV-2<br>testing team,<br>National<br>Institute of<br>Infectious<br>Diseases | Pathogen<br>Genomics<br>Center, National<br>Institute of<br>Infectious<br>Diseases | Tsuyoshi Sekizuka,<br>Kentaro Itokawa, Rina<br>Tanaka, Masanori<br>Hashino, Nozomu<br>Hanaoka, Masumichi<br>Saito, Naomi Nojiri,<br>Hazuka Y Furihata,<br>Tsuguto Fujimoto,<br>Makoto Kuroda |
| hCoV-19/Japan/IC-10593/2022 | EPI_ISL_1<br>3167861 | - | SARS-CoV-2<br>testing team,<br>National<br>Institute of<br>Infectious<br>Diseases | Pathogen<br>Genomics<br>Center, National<br>Institute of<br>Infectious<br>Diseases | Tsuyoshi Sekizuka,<br>Kentaro Itokawa, Rina<br>Tanaka, Masanori<br>Hashino, Nozomu<br>Hanaoka, Masumichi<br>Saito, Naomi Nojiri,<br>Hazuka Y Furihata,<br>Tsuguto Fujimoto,<br>Makoto Kuroda |
| hCoV-19/Japan/IC-10581/2022 | EPI_ISL_1<br>3167851 | - | SARS-CoV-2<br>testing team,<br>National<br>Institute of<br>Infectious<br>Diseases | Pathogen<br>Genomics<br>Center, National<br>Institute of<br>Infectious<br>Diseases | Tsuyoshi Sekizuka,<br>Kentaro Itokawa, Rina<br>Tanaka, Masanori<br>Hashino, Nozomu<br>Hanaoka, Masumichi<br>Saito, Naomi Nojiri,<br>Hazuka Y Furihata,<br>Tsuguto Fujimoto,<br>Makoto Kuroda |
| hCoV-19/Japan/IC-10546/2022 | EPI_ISL_1<br>3167827 | - | SARS-CoV-2<br>testing team,<br>National<br>Institute of<br>Infectious<br>Diseases | Pathogen<br>Genomics<br>Center, National<br>Institute of<br>Infectious<br>Diseases | Tsuyoshi Sekizuka,<br>Kentaro Itokawa, Rina<br>Tanaka, Masanori<br>Hashino, Nozomu<br>Hanaoka, Masumichi<br>Saito, Naomi Nojiri,<br>Hazuka Y Furihata,<br>Tsuguto Fujimoto,<br>Makoto Kuroda |
| hCoV-19/Japan/IC-10456/2022 | EPI_ISL_1<br>3167755 | - | SARS-CoV-2<br>testing team,<br>National<br>Institute of<br>Infectious<br>Diseases | Pathogen<br>Genomics<br>Center, National<br>Institute of<br>Infectious<br>Diseases | Tsuyoshi Sekizuka,<br>Kentaro Itokawa, Rina<br>Tanaka, Masanori<br>Hashino, Nozomu<br>Hanaoka, Masumichi<br>Saito, Naomi Nojiri,<br>Hazuka Y Furihata,<br>Tsuguto Fujimoto,<br>Makoto Kuroda |
| hCoV-19/Japan/IC-10455/2022 | EPI_ISL_1<br>3167754 | - | SARS-CoV-2<br>testing team,<br>National                                           | Pathogen<br>Genomics<br>Center, National                                           | Tsuyoshi Sekizuka,<br>Kentaro Itokawa, Rina<br>Tanaka, Masanori                                                                                                                              |

|                                              |                      |          |                                                                    |                                                                     |                                                                                                                                                                                                                |
|----------------------------------------------|----------------------|----------|--------------------------------------------------------------------|---------------------------------------------------------------------|----------------------------------------------------------------------------------------------------------------------------------------------------------------------------------------------------------------|
|                                              |                      |          | Institute of Infectious Diseases                                   | Institute of Infectious Diseases                                    | Hashino, Nozomu<br>Hanaoka, Masumichi<br>Saito, Naomi Nojiri,<br>Hazuka Y Furihata,<br>Tsuguto Fujimoto,<br>Makoto Kuroda                                                                                      |
| hCoV-19/Japan/IC-10424/2022                  | EPI_ISL_1<br>3027633 | -        | SARS-CoV-2 testing team, National Institute of Infectious Diseases | Pathogen Genomics Center, National Institute of Infectious Diseases | Tsuyoshi Sekizuka,<br>Kentaro Itokawa, Rina Tanaka, Masanori Hashino, Nozomu Hanaoka, Masumichi Saito, Naomi Nojiri,<br>Hazuka Y Furihata,<br>Tsuguto Fujimoto,<br>Makoto Kuroda                               |
| hCoV-19/Japan/IC-10423/2022                  | EPI_ISL_1<br>3027632 | -        | SARS-CoV-2 testing team, National Institute of Infectious Diseases | Pathogen Genomics Center, National Institute of Infectious Diseases | Tsuyoshi Sekizuka,<br>Kentaro Itokawa, Rina Tanaka, Masanori Hashino, Nozomu Hanaoka, Masumichi Saito, Naomi Nojiri,<br>Hazuka Y Furihata,<br>Tsuguto Fujimoto,<br>Makoto Kuroda                               |
| hCoV-19/Japan/IC-10105/2022                  | EPI_ISL_1<br>3027412 | -        | SARS-CoV-2 testing team, National Institute of Infectious Diseases | Pathogen Genomics Center, National Institute of Infectious Diseases | Tsuyoshi Sekizuka,<br>Kentaro Itokawa, Rina Tanaka, Masanori Hashino, Nozomu Hanaoka, Masumichi Saito, Naomi Nojiri,<br>Hazuka Y Furihata,<br>Tsuguto Fujimoto,<br>Makoto Kuroda                               |
| Japan/Donner417/2021                         | EPI_ISL_1<br>973268  | BS001081 | -                                                                  | -                                                                   | Kosaki et al                                                                                                                                                                                                   |
| hCoV-19/Italy/UMB-LAOP-74-1-03-2022/2022     | EPI_ISL_1<br>3440240 | -        | A.O. TERNI                                                         | A.O. PERUGIA                                                        | Palumbo M, Scaccetti A, Bicchieraro G, Ciurnelli R, Cappelletti E, Lepri E, Bondi P, Lucheroni F, Spaccapelo R                                                                                                 |
| hCoV-19/Indonesia/JK-NIHRD-WGS.22.05393/2022 | EPI_ISL_1<br>3501633 | -        | RSDC Wisma Atlet Kemayoran                                         | National Institute of Health Research and Development               | Nur Ika Hariastuti,<br>Hana Apsari Pawestri,<br>Arie Ardiansyah Nugraha, Fajar Nur Sulistiyohadi, Hartanti Dian Ikawati,<br>Subangkit, Kartika Dewi Puspa, Putri Widia Astuti, Nelis Imaningsih, IGM Wirabrata |

|                                              |                      |   |                               |                                                                   |                                                                                                                                                                                                                                     |
|----------------------------------------------|----------------------|---|-------------------------------|-------------------------------------------------------------------|-------------------------------------------------------------------------------------------------------------------------------------------------------------------------------------------------------------------------------------|
| hCoV-19/Indonesia/JK-NIHRD-WGS.22.05391/2022 | EPI_ISL_1<br>3501631 | - | RSDC Wisma<br>Atlet Kemayoran | National<br>Institute of<br>Health Research<br>and<br>Development | Nur Ika Hariastuti,<br>Hana Apsari Pawestri,<br>Arie Ardiansyah<br>Nugraha, Fajar Nur<br>Sulistiyohadi, Hartanti<br>Dian Ikawati,<br>Subangkit, Kartika<br>Dewi Puspa, Putri<br>Widia Astuti, Nelis<br>Imaningsih, IGM<br>Wirabrata |
| hCoV-19/Indonesia/JK-NIHRD-WGS.22.05182/2022 | EPI_ISL_1<br>3501539 | - | RSDC Wisma<br>Atlet Kemayoran | National<br>Institute of<br>Health Research<br>and<br>Development | Fajar Nur<br>Sulistiyohadi, Hartanti<br>Dian Ikawati, Arie<br>Ardiansyah Nugraha,<br>Hana Apsari Pawestri,<br>Subangkit, Kartika<br>Dewi Puspa, Nur Ika<br>Hariastuti, Putri Widia<br>Astuti, Nelis<br>Imaningsih, IGM<br>Wirabrata |
| hCoV-19/Indonesia/JK-NIHRD-WGS.22.05181/2022 | EPI_ISL_1<br>3501538 | - | RSDC Wisma<br>Atlet Kemayoran | National<br>Institute of<br>Health Research<br>and<br>Development | Fajar Nur<br>Sulistiyohadi, Hartanti<br>Dian Ikawati, Arie<br>Ardiansyah Nugraha,<br>Hana Apsari Pawestri,<br>Subangkit, Kartika<br>Dewi Puspa, Nur Ika<br>Hariastuti, Putri Widia<br>Astuti, Nelis<br>Imaningsih, IGM<br>Wirabrata |
| hCoV-19/Indonesia/JK-NIHRD-WGS-22-06337/2022 | EPI_ISL_1<br>3638122 | - | GSI Lab                       | National<br>Institute of<br>Health Research<br>and<br>Development | Subangkit, Hana<br>Apsari Pawestri, Arie<br>Ardiansyah Nugraha,<br>Fajar Nur<br>Sulistiyohadi, Hartanti<br>Dian Ikawati, Kartika<br>Dewi Puspa, Nur Ika<br>Hariastuti, Putri Widia<br>Astuti, Nelis<br>Imaningsih, IGM<br>Wirabrata |
| hCoV-19/Indonesia/JK-NIHRD-WGS-22-06322/2022 | EPI_ISL_1<br>3638119 | - | GSI Lab                       | National<br>Institute of<br>Health Research<br>and<br>Development | Nur Ika Hariastuti,<br>Hana Apsari Pawestri,<br>Arie Ardiansyah<br>Nugraha, Fajar Nur<br>Sulistiyohadi, Hartanti<br>Dian Ikawati,<br>Subangkit, Kartika<br>Dewi Puspa, Putri                                                        |



|                                              |                      |   |                             |                                                       |                                                                                                                                                                                                       |
|----------------------------------------------|----------------------|---|-----------------------------|-------------------------------------------------------|-------------------------------------------------------------------------------------------------------------------------------------------------------------------------------------------------------|
|                                              |                      |   |                             |                                                       | Widia Astuti, Nelis Imaningsih, IGM Wirabrata                                                                                                                                                         |
| hCoV-19/Indonesia/JK-NIHRD-WGS-22-05733/2022 | EPI_ISL_1<br>3521470 | - | RSDC Wisma Atlet Kemayoran  | National Institute of Health Research and Development | Nur Ika Hariastuti, Hana Apsari Pawestri, Arie Ardiansyah Nugraha, Fajar Nur Sulistiyohadi, Hartanti Dian Ikawati, Subangkit, Kartika Dewi Puspa, Putri Widia Astuti, Nelis Imaningsih, IGM Wirabrata |
| hCoV-19/Indonesia/JK-NIHRD-WGS_22_06654/2022 | EPI_ISL_1<br>3637472 | - | Econolab Jakarta            | National Institute of Health Research and Development | Nur Ika Hariastuti, Hana Apsari Pawestri, Arie Ardiansyah Nugraha, Fajar Nur Sulistiyohadi, Hartanti Dian Ikawati, Subangkit, Kartika Dewi Puspa, Putri Widia Astuti, Nelis Imaningsih, IGM Wirabrata |
| hCoV-19/Indonesia/JK-NIHRD-WGS_22_06381/2022 | EPI_ISL_1<br>3636548 | - | Econolab jakarta            | National Institute of Health Research and Development | Hartanti Dian Ikawati, Arie Ardiansyah Nugraha, Fajar Nur Sulistiyohadi, Hana Apsari Pawestri, Subangkit, Kartika Dewi Puspa, Nur Ika Hariastuti, Putri Widia Astuti, Nelis Imaningsih, IGM Wirabrata |
| hCoV-19/Indonesia/JK-NIHRD-WGS_22_04949/2022 | EPI_ISL_1<br>3466509 | - | Laboratorium Klinik Karunia | National Institute of Health Research and Development | Hana Apsari Pawestri, Arie Ardiansyah Nugraha, Fajar Nur Sulistiyohadi, Hartanti Dian Ikawati, Subangkit, Kartika Dewi Puspa, Nur Ika Hariastuti, Putri Widia Astuti, Nelis Imaningsih, IGM Wirabrata |
| hCoV-19/Indonesia/JK-NIHRD-WGS_22_04948/2022 | EPI_ISL_1<br>3466508 | - | Laboratorium Klinik Karunia | National Institute of Health Research and Development | Hana Apsari Pawestri, Arie Ardiansyah Nugraha, Fajar Nur Sulistiyohadi, Hartanti Dian Ikawati,                                                                                                        |

|                                                      |                      |   |                                |                                                                   |                                                                                                                                                                                                                                     |
|------------------------------------------------------|----------------------|---|--------------------------------|-------------------------------------------------------------------|-------------------------------------------------------------------------------------------------------------------------------------------------------------------------------------------------------------------------------------|
|                                                      |                      |   |                                |                                                                   | Subangkit, Kartika<br>Dewi Puspa, Nur Ika<br>Hariastuti, Putri Widia<br>Astuti, Nelis<br>Imaningsih, IGM<br>Wirabrata                                                                                                               |
| hCoV-19/Indonesia/JK-<br>NIHRD-<br>WGS_22_04945/2022 | EPI_ISL_1<br>3466506 | - | Laboratorium<br>Klinik Karunia | National<br>Institute of<br>Health Research<br>and<br>Development | Subangkit, Hana<br>Apsari Pawestri, Arie<br>Ardiansyah Nugraha,<br>Fajar Nur<br>Sulistiyohadi, Hartanti<br>Dian Ikawati, Kartika<br>Dewi Puspa, Nur Ika<br>Hariastuti, Putri Widia<br>Astuti, Nelis<br>Imaningsih, IGM<br>Wirabrata |
| hCoV-19/Indonesia/JK-<br>NIHRD-<br>WGS_22_04943/2022 | EPI_ISL_1<br>3466505 | - | Laboratorium<br>Klinik Karunia | National<br>Institute of<br>Health Research<br>and<br>Development | Hana Apsari Pawestri,<br>Arie Ardiansyah<br>Nugraha, Fajar Nur<br>Sulistiyohadi, Hartanti<br>Dian Ikawati,<br>Subangkit, Kartika<br>Dewi Puspa, Nur Ika<br>Hariastuti, Putri Widia<br>Astuti, Nelis<br>Imaningsih, IGM<br>Wirabrata |
| hCoV-19/Indonesia/JK-<br>NIHRD-<br>WGS_22_04942/2022 | EPI_ISL_1<br>3466504 | - | Laboratorium<br>Klinik Karunia | National<br>Institute of<br>Health Research<br>and<br>Development | Nur Ika Hariastuti,<br>Hana Apsari Pawestri,<br>Arie Ardiansyah<br>Nugraha, Fajar Nur<br>Sulistiyohadi, Hartanti<br>Dian Ikawati,<br>Subangkit, Kartika<br>Dewi Puspa, Putri<br>Widia Astuti, Nelis<br>Imaningsih, IGM<br>Wirabrata |
| hCoV-19/Indonesia/JK-<br>NIHRD-<br>WGS_22_04941/2022 | EPI_ISL_1<br>3466503 | - | Laboratorium<br>Klinik Karunia | National<br>Institute of<br>Health Research<br>and<br>Development | Nur Ika Hariastuti,<br>Hana Apsari Pawestri,<br>Arie Ardiansyah<br>Nugraha, Fajar Nur<br>Sulistiyohadi, Hartanti<br>Dian Ikawati,<br>Subangkit, Kartika<br>Dewi Puspa, Putri<br>Widia Astuti, Nelis<br>Imaningsih, IGM<br>Wirabrata |
| hCoV-19/Indonesia/JB-<br>NIHRD-                      | EPI_ISL_1<br>3905517 | - | Helix<br>Laboratorium          | National<br>Institute of                                          | Nelis Imaningsih, Arie<br>Ardiansyah Nugraha,                                                                                                                                                                                       |

|                                              |                     |  |                       |                                                       |                                                                                                                                                                                                       |
|----------------------------------------------|---------------------|--|-----------------------|-------------------------------------------------------|-------------------------------------------------------------------------------------------------------------------------------------------------------------------------------------------------------|
| WGS.22.08079/2022                            |                     |  |                       | Health Research and Development                       | Fajar Nur Sulistiyohadi, Hana Apsari Pawestri, Hartanti Dian Ikawati, Subangkit, Kartika Dewi Puspa, Nur Ika Hariastuti, Putri Widia Astuti, IGM Wirabrata                                            |
| hCoV-19/Indonesia/JB-NIHRD-WGS-22-07573/2022 | EPI_ISL_1 - 3752196 |  | Naraya Medical Center | National Institute of Health Research and Development | Kartika Dewi Puspa, Arie Ardiansyah Nugraha, Fajar Nur Sulistiyohadi, Hana Apsari Pawestri, Hartanti Dian Ikawati, Subangkit, Nur Ika Hariastuti, Putri Widia Astuti, Nelis Imaningsih, IGM Wirabrata |
| hCoV-19/Indonesia/JB-NIHRD-WGS-22-07572/2022 | EPI_ISL_1 - 3752205 |  | Naraya Medical Center | National Institute of Health Research and Development | Subangkit, Hana Apsari Pawestri, Arie Ardiansyah Nugraha, Fajar Nur Sulistiyohadi, Hartanti Dian Ikawati, Kartika Dewi Puspa, Nur Ika Hariastuti, Putri Widia Astuti, Nelis Imaningsih, IGM Wirabrata |
| hCoV-19/Indonesia/JB-NIHRD-WGS-22-07569/2022 | EPI_ISL_1 - 3752200 |  | Naraya Medical Center | National Institute of Health Research and Development | Nur Ika Hariastuti, Hana Apsari Pawestri, Arie Ardiansyah Nugraha, Fajar Nur Sulistiyohadi, Hartanti Dian Ikawati, Subangkit, Kartika Dewi Puspa, Putri Widia Astuti, Nelis Imaningsih, IGM Wirabrata |
| hCoV-19/Indonesia/JB-NIHRD-WGS-22-07567/2022 | EPI_ISL_1 - 3752202 |  | Naraya Medical Center | National Institute of Health Research and Development | Nur Ika Hariastuti, Hana Apsari Pawestri, Arie Ardiansyah Nugraha, Fajar Nur Sulistiyohadi, Hartanti Dian Ikawati, Subangkit, Kartika Dewi Puspa, Putri Widia Astuti, Nelis Imaningsih, IGM Wirabrata |

|                                                    |                      |   |                       |                                                                                         |                                                                                                                                                                                                       |
|----------------------------------------------------|----------------------|---|-----------------------|-----------------------------------------------------------------------------------------|-------------------------------------------------------------------------------------------------------------------------------------------------------------------------------------------------------|
| hCoV-19/Indonesia/JB-NIHRD-WGS-22-07564/2022       | EPI_ISL_1<br>3752198 | - | Naraya Medical Center | National Institute of Health Research and Development                                   | Nur Ika Hariastuti, Hana Apsari Pawestri, Arie Ardiansyah Nugraha, Fajar Nur Sulistiyohadi, Hartanti Dian Ikawati, Subangkit, Kartika Dewi Puspa, Putri Widia Astuti, Nelis Imaningsih, IGM Wirabrata |
| hCoV-19/Indonesia/JB-NIHRD-WGS-22-07563/2022       | EPI_ISL_1<br>3752207 | - | Naraya Medical Center | National Institute of Health Research and Development                                   | Nur Ika Hariastuti, Hana Apsari Pawestri, Arie Ardiansyah Nugraha, Fajar Nur Sulistiyohadi, Hartanti Dian Ikawati, Subangkit, Kartika Dewi Puspa, Putri Widia Astuti, Nelis Imaningsih, IGM Wirabrata |
| hCoV-19/Indonesia/JB-NIHRD-WGS-22-07562/2022       | EPI_ISL_1<br>3752197 | - | Naraya Medical Center | National Institute of Health Research and Development                                   | Nur Ika Hariastuti, Hana Apsari Pawestri, Arie Ardiansyah Nugraha, Fajar Nur Sulistiyohadi, Hartanti Dian Ikawati, Subangkit, Kartika Dewi Puspa, Putri Widia Astuti, Nelis Imaningsih, IGM Wirabrata |
| hCoV-19/Indonesia/JB-NIHRD-WGS-22-07559/2022       | EPI_ISL_1<br>3752208 | - | Naraya Medical Center | National Institute of Health Research and Development                                   | Hana Apsari Pawestri, Arie Ardiansyah Nugraha, Fajar Nur Sulistiyohadi, Hartanti Dian Ikawati, Subangkit, Kartika Dewi Puspa, Nur Ika Hariastuti, Putri Widia Astuti, Nelis Imaningsih, IGM Wirabrata |
| hCoV-19/Indonesia/JB-GS-WJHL-ITB-NIHRD-W03778/2022 | EPI_ISL_1<br>3745626 | - | Helix Laboratorium    | West Java Health Laboratory; School of Life Sciences and Technology, Institut Teknologi | Azzania Fibriani, Miftahul Faridl, Karimatu Khoirunnisa, Ema Rahmawati, Ryan Bayusantika Ristandi, Rifky Waluyajati Rachman, Cut Nur Cinthia Alamanda, Rini                                           |

|                                                            |                      |              |                                                                                                         |                                                                                                                                                                                          |                                                                                                                                                                                                                                                                                                                                                                                       |
|------------------------------------------------------------|----------------------|--------------|---------------------------------------------------------------------------------------------------------|------------------------------------------------------------------------------------------------------------------------------------------------------------------------------------------|---------------------------------------------------------------------------------------------------------------------------------------------------------------------------------------------------------------------------------------------------------------------------------------------------------------------------------------------------------------------------------------|
|                                                            |                      |              |                                                                                                         | Bandung;<br>National<br>Institute of<br>Health Research<br>& Development                                                                                                                 | Robiani, Hadiana,<br>Hana Apsari Pawestri,<br>Nelis Imaningsih,<br>Subangkit, IGM<br>Wirabrata                                                                                                                                                                                                                                                                                        |
| hCoV-19/Indonesia/JB-<br>GS-WJHL-ITB-NIHRD-<br>W03773/2022 | EPI_ISL_1<br>3745623 | -            | Helix<br>Laboratorium                                                                                   | West Java<br>Health<br>Laboratory;<br>School of Life<br>Sciences and<br>Technology,<br>Institut<br>Teknologi<br>Bandung;<br>National<br>Institute of<br>Health Research<br>& Development | Azzania Fibriani,<br>Miftahul Faridl,<br>Karimatu Khoirunnisa,<br>Ema Rahmawati, Ryan<br>Bayusantika Ristandi,<br>Rifky Waluyajati<br>Rachman, Cut Nur<br>Cinthia Alamanda, Rini<br>Robiani, Hadiana,<br>Hana Apsari Pawestri,<br>Nelis Imaningsih,<br>Subangkit, IGM<br>Wirabrata                                                                                                    |
| hCoV-19/Indonesia/JB-<br>GS-FKUNPAD-<br>0445/2022          | EPI_ISL_1<br>3783247 | -            | Laboratorium RS<br>Immanuel                                                                             | Laboratorium<br>Genetik<br>Molekuler,<br>Biomedik Lanjut,<br>FK UNPAD                                                                                                                    | Yunia Sribudiani,<br>Chrysanti Murad, Dwi<br>Agustian, Lidya<br>Chaidir, Savira<br>Ekawardhani, Nurul<br>Setia Rahayu, Fensi<br>Amalia, Jessi Annisa,<br>Yeni Rendieni, Yanu,<br>Shinta, Nuni Haeruni,<br>Ida Parwati, Tri<br>Hanggono Ahmad                                                                                                                                          |
| IND/INSACOG-<br>GBRC1397/2021                              | EPI_ISL_3<br>162116  | OM84662<br>8 | -                                                                                                       | -                                                                                                                                                                                        | Kumar et al                                                                                                                                                                                                                                                                                                                                                                           |
| IND/CD211294/2021                                          | EPI_ISL_2<br>714697  | MW96975<br>5 | -                                                                                                       | -                                                                                                                                                                                        | Shrivastava et al                                                                                                                                                                                                                                                                                                                                                                     |
| HongKong/HKPU-<br>00174/2020                               | -                    | MZ266523     | -                                                                                                       | -                                                                                                                                                                                        | Siu et al                                                                                                                                                                                                                                                                                                                                                                             |
| hCoV-<br>19/HongKong/HK-<br>HKPU-<br>PUU038211539/2022     | EPI_ISL_1<br>3140549 | -            | Department of<br>Health<br>Technology and<br>Informatics, The<br>Hong Kong<br>Polytechnic<br>University | Department of<br>Health<br>Technology and<br>Informatics, The<br>Hong Kong<br>Polytechnic<br>University                                                                                  | Gilman Kit-Hang Siu,<br>Lam-Kwong Lee,<br>Kenneth Siu-Sing<br>Leung, Jake Siu-Lun<br>Leung, Wing-Hei Lo,<br>Timothy Ting-Leung<br>Ng, Chloe Toi-Mei<br>Chan, Ivan Tak-Fai<br>Wong, Kingsley King-<br>Gee Tam, Hiu-Yin Lao,<br>Alan Ka-Lun Wu,<br>Miranda Chong-Yee<br>Yau, Yvette Wai-Man<br>Lai, Kitty Sau-Chun<br>Fung, Sandy Ka-Yee<br>Chau, Barry Kin-Chung<br>Wong, Wing-Kin To, |

|                                            |                     |                                                                                       |                                                                                       |                                                                                                                                                                                                                                                                                                                                                                                                                                                    |
|--------------------------------------------|---------------------|---------------------------------------------------------------------------------------|---------------------------------------------------------------------------------------|----------------------------------------------------------------------------------------------------------------------------------------------------------------------------------------------------------------------------------------------------------------------------------------------------------------------------------------------------------------------------------------------------------------------------------------------------|
|                                            |                     |                                                                                       |                                                                                       | Kristine Luk, Alex Yat-Man Ho, Tak-Lun Que, Kam-Tong Yip, Wing Cheong Yam, David Ho-Keung Shum, Shea Ping Yip                                                                                                                                                                                                                                                                                                                                      |
| hCoV-19/HongKong/HK-HKPU-PUU038145226/2022 | EPI_ISL_1 - 3140493 | Department of Health Technology and Informatics, The Hong Kong Polytechnic University | Department of Health Technology and Informatics, The Hong Kong Polytechnic University | Gilman Kit-Hang Siu, Lam-Kwong Lee, Kenneth Siu-Sing Leung, Jake Siu-Lun Leung, Wing-Hei Lo, Timothy Ting-Leung Ng, Chloe Toi-Mei Chan, Ivan Tak-Fai Wong, Kingsley King-Gee Tam, Hiu-Yin Lao, Alan Ka-Lun Wu, Miranda Chong-Yee Yau, Yvette Wai-Man Lai, Kitty Sau-Chun Fung, Sandy Ka-Yee Chau, Barry Kin-Chung Wong, Wing-Kin To, Kristine Luk, Alex Yat-Man Ho, Tak-Lun Que, Kam-Tong Yip, Wing Cheong Yam, David Ho-Keung Shum, Shea Ping Yip |
| hCoV-19/HongKong/HK-HKPU-PUU038143347/2022 | EPI_ISL_1 - 3140494 | Department of Health Technology and Informatics, The Hong Kong Polytechnic University | Department of Health Technology and Informatics, The Hong Kong Polytechnic University | Gilman Kit-Hang Siu, Lam-Kwong Lee, Kenneth Siu-Sing Leung, Jake Siu-Lun Leung, Wing-Hei Lo, Timothy Ting-Leung Ng, Chloe Toi-Mei Chan, Ivan Tak-Fai Wong, Kingsley King-Gee Tam, Hiu-Yin Lao, Alan Ka-Lun Wu, Miranda Chong-Yee Yau, Yvette Wai-Man Lai, Kitty Sau-Chun Fung, Sandy Ka-Yee Chau, Barry Kin-Chung Wong, Wing-Kin To, Kristine Luk, Alex Yat-Man Ho, Tak-Lun Que, Kam-Tong Yip, Wing Cheong Yam, David Ho-Keung Shum, Shea Ping Yip |

|                                            |                      |   |                                                                                          |                                                                                          |                                                                                                                                                                                                                                                                                                                                                                                                                                                          |
|--------------------------------------------|----------------------|---|------------------------------------------------------------------------------------------|------------------------------------------------------------------------------------------|----------------------------------------------------------------------------------------------------------------------------------------------------------------------------------------------------------------------------------------------------------------------------------------------------------------------------------------------------------------------------------------------------------------------------------------------------------|
| hCoV-19/HongKong/HK-HKPU-PUU037449426/2022 | EPI_ISL_1<br>3140558 | - | Department of Health<br>Technology and Informatics, The Hong Kong Polytechnic University | Department of Health<br>Technology and Informatics, The Hong Kong Polytechnic University | Gilman Kit-Hang Siu,<br>Lam-Kwong Lee,<br>Kenneth Siu-Sing Leung, Jake Siu-Lun Leung, Wing-Hei Lo, Timothy Ting-Leung Ng, Chloe Toi-Mei Chan, Ivan Tak-Fai Wong, Kingsley King-Gee Tam, Hiu-Yin Lao, Alan Ka-Lun Wu, Miranda Chong-Yee Yau, Yvette Wai-Man Lai, Kitty Sau-Chun Fung, Sandy Ka-Yee Chau, Barry Kin-Chung Wong, Wing-Kin To, Kristine Luk, Alex Yat-Man Ho, Tak-Lun Que, Kam-Tong Yip, Wing Cheong Yam, David Ho-Keung Shum, Shea Ping Yip |
| hCoV-19/HongKong/HK-HKPU-PUU037300686/2022 | EPI_ISL_1<br>2812535 | - | Department of Health<br>Technology and Informatics, The Hong Kong Polytechnic University | Department of Health<br>Technology and Informatics, The Hong Kong Polytechnic University | Gilman Kit-Hang Siu,<br>Lam-Kwong Lee,<br>Kenneth Siu-Sing Leung, Jake Siu-Lun Leung, Wing-Hei Lo, Timothy Ting-Leung Ng, Chloe Toi-Mei Chan, Ivan Tak-Fai Wong, Kingsley King-Gee Tam, Hiu-Yin Lao, Alan Ka-Lun Wu, Miranda Chong-Yee Yau, Yvette Wai-Man Lai, Kitty Sau-Chun Fung, Sandy Ka-Yee Chau, Barry Kin-Chung Wong, Wing-Kin To, Kristine Luk, Alex Yat-Man Ho, Tak-Lun Que, Kam-Tong Yip, Wing Cheong Yam, David Ho-Keung Shum, Shea Ping Yip |
| hCoV-19/HongKong/HK-HKPU-PUU037283374/2022 | EPI_ISL_1<br>3140316 | - | Department of Health<br>Technology and Informatics, The Hong Kong Polytechnic University | Department of Health<br>Technology and Informatics, The Hong Kong Polytechnic University | Gilman Kit-Hang Siu,<br>Lam-Kwong Lee,<br>Kenneth Siu-Sing Leung, Jake Siu-Lun Leung, Wing-Hei Lo, Timothy Ting-Leung                                                                                                                                                                                                                                                                                                                                    |

|                                                        |                        |  |                                                                                                         |                                                                                                         |                                                                                                                                                                                                                                                                                                                                                                                                                                                                                                                        |
|--------------------------------------------------------|------------------------|--|---------------------------------------------------------------------------------------------------------|---------------------------------------------------------------------------------------------------------|------------------------------------------------------------------------------------------------------------------------------------------------------------------------------------------------------------------------------------------------------------------------------------------------------------------------------------------------------------------------------------------------------------------------------------------------------------------------------------------------------------------------|
|                                                        |                        |  | University                                                                                              | University                                                                                              | Ng, Chloe Toi-Mei<br>Chan, Ivan Tak-Fai<br>Wong, Kingsley King-<br>Gee Tam, Hiu-Yin Lao,<br>Alan Ka-Lun Wu,<br>Miranda Chong-Yee<br>Yau, Yvette Wai-Man<br>Lai, Kitty Sau-Chun<br>Fung, Sandy Ka-Yee<br>Chau, Barry Kin-Chung<br>Wong, Wing-Kin To,<br>Kristine Luk, Alex Yat-<br>Man Ho, Tak-Lun Que,<br>Kam-Tong Yip, Wing<br>Cheong Yam, David<br>Ho-Keung Shum, Shea<br>Ping Yip                                                                                                                                   |
| hCoV-<br>19/HongKong/HK-<br>HKPU-<br>PUU037225137/2022 | EPI_ISL_1 -<br>2839558 |  | Department of<br>Health<br>Technology and<br>Informatics, The<br>Hong Kong<br>Polytechnic<br>University | Department of<br>Health<br>Technology and<br>Informatics, The<br>Hong Kong<br>Polytechnic<br>University | Gilman Kit-Hang Siu,<br>Lam-Kwong Lee,<br>Kenneth Siu-Sing<br>Leung, Jake Siu-Lun<br>Leung, Wing-Hei Lo,<br>Timothy Ting-Leung<br>Ng, Chloe Toi-Mei<br>Chan, Ivan Tak-Fai<br>Wong, Kingsley King-<br>Gee Tam, Hiu-Yin Lao,<br>Alan Ka-Lun Wu,<br>Miranda Chong-Yee<br>Yau, Yvette Wai-Man<br>Lai, Kitty Sau-Chun<br>Fung, Sandy Ka-Yee<br>Chau, Barry Kin-Chung<br>Wong, Wing-Kin To,<br>Kristine Luk, Alex Yat-<br>Man Ho, Tak-Lun Que,<br>Kam-Tong Yip, Wing<br>Cheong Yam, David<br>Ho-Keung Shum, Shea<br>Ping Yip |
| hCoV-<br>19/HongKong/HK-<br>HKPU-<br>PUU037168354/2022 | EPI_ISL_1 -<br>2810066 |  | Department of<br>Health<br>Technology and<br>Informatics, The<br>Hong Kong<br>Polytechnic<br>University | Department of<br>Health<br>Technology and<br>Informatics, The<br>Hong Kong<br>Polytechnic<br>University | Gilman Kit-Hang Siu,<br>Lam-Kwong Lee,<br>Kenneth Siu-Sing<br>Leung, Jake Siu-Lun<br>Leung, Wing-Hei Lo,<br>Timothy Ting-Leung<br>Ng, Chloe Toi-Mei<br>Chan, Ivan Tak-Fai<br>Wong, Kingsley King-<br>Gee Tam, Hiu-Yin Lao,<br>Alan Ka-Lun Wu,<br>Miranda Chong-Yee                                                                                                                                                                                                                                                     |



|                                                        |                        |                                                                                                         |                                                                                                         |                                                                                                                                                                                                                                                                                                                                                                                                                                                                                                                        |
|--------------------------------------------------------|------------------------|---------------------------------------------------------------------------------------------------------|---------------------------------------------------------------------------------------------------------|------------------------------------------------------------------------------------------------------------------------------------------------------------------------------------------------------------------------------------------------------------------------------------------------------------------------------------------------------------------------------------------------------------------------------------------------------------------------------------------------------------------------|
|                                                        |                        |                                                                                                         |                                                                                                         | Yau, Yvette Wai-Man<br>Lai, Kitty Sau-Chun<br>Fung, Sandy Ka-Yee<br>Chau, Barry Kin-Chung<br>Wong, Wing-Kin To,<br>Kristine Luk, Alex Yat-<br>Man Ho, Tak-Lun Que,<br>Kam-Tong Yip, Wing<br>Cheong Yam, David<br>Ho-Keung Shum, Shea<br>Ping Yip                                                                                                                                                                                                                                                                       |
| hCoV-<br>19/HongKong/HK-<br>HKPU-<br>PUU010577490/2022 | EPI_ISL_1 -<br>2810023 | Department of<br>Health<br>Technology and<br>Informatics, The<br>Hong Kong<br>Polytechnic<br>University | Department of<br>Health<br>Technology and<br>Informatics, The<br>Hong Kong<br>Polytechnic<br>University | Gilman Kit-Hang Siu,<br>Lam-Kwong Lee,<br>Kenneth Siu-Sing<br>Leung, Jake Siu-Lun<br>Leung, Wing-Hei Lo,<br>Timothy Ting-Leung<br>Ng, Chloe Toi-Mei<br>Chan, Ivan Tak-Fai<br>Wong, Kingsley King-<br>Gee Tam, Hiu-Yin Lao,<br>Alan Ka-Lun Wu,<br>Miranda Chong-Yee<br>Yau, Yvette Wai-Man<br>Lai, Kitty Sau-Chun<br>Fung, Sandy Ka-Yee<br>Chau, Barry Kin-Chung<br>Wong, Wing-Kin To,<br>Kristine Luk, Alex Yat-<br>Man Ho, Tak-Lun Que,<br>Kam-Tong Yip, Wing<br>Cheong Yam, David<br>Ho-Keung Shum, Shea<br>Ping Yip |
| hCoV-<br>19/HongKong/HK-<br>HKPU-<br>PUU003946974/2022 | EPI_ISL_1 -<br>2812523 | Department of<br>Health<br>Technology and<br>Informatics, The<br>Hong Kong<br>Polytechnic<br>University | Department of<br>Health<br>Technology and<br>Informatics, The<br>Hong Kong<br>Polytechnic<br>University | Gilman Kit-Hang Siu,<br>Lam-Kwong Lee,<br>Kenneth Siu-Sing<br>Leung, Jake Siu-Lun<br>Leung, Wing-Hei Lo,<br>Timothy Ting-Leung<br>Ng, Chloe Toi-Mei<br>Chan, Ivan Tak-Fai<br>Wong, Kingsley King-<br>Gee Tam, Hiu-Yin Lao,<br>Alan Ka-Lun Wu,<br>Miranda Chong-Yee<br>Yau, Yvette Wai-Man<br>Lai, Kitty Sau-Chun<br>Fung, Sandy Ka-Yee<br>Chau, Barry Kin-Chung<br>Wong, Wing-Kin To,<br>Kristine Luk, Alex Yat-                                                                                                       |

|                                                        |                      |   |                                                                                                                  |                                                                                                         |                                                                                                                                                                                                                                                                                                                                                                                                                                                                                                                        |
|--------------------------------------------------------|----------------------|---|------------------------------------------------------------------------------------------------------------------|---------------------------------------------------------------------------------------------------------|------------------------------------------------------------------------------------------------------------------------------------------------------------------------------------------------------------------------------------------------------------------------------------------------------------------------------------------------------------------------------------------------------------------------------------------------------------------------------------------------------------------------|
|                                                        |                      |   |                                                                                                                  | Man Ho, Tak-Lun Que,<br>Kam-Tong Yip, Wing<br>Cheong Yam, David<br>Ho-Keung Shum, Shea<br>Ping Yip      |                                                                                                                                                                                                                                                                                                                                                                                                                                                                                                                        |
| hCoV-<br>19/HongKong/HK-<br>HKPU-<br>PUB061691447/2022 | EPI_ISL_1<br>2419269 | - | Department of<br>Health<br>Technology and<br>Informatics, The<br>Hong Kong<br>Polytechnic<br>University          | Department of<br>Health<br>Technology and<br>Informatics, The<br>Hong Kong<br>Polytechnic<br>University | Gilman Kit-Hang Siu,<br>Lam-Kwong Lee,<br>Kenneth Siu-Sing<br>Leung, Jake Siu-Lun<br>Leung, Wing-Hei Lo,<br>Timothy Ting-Leung<br>Ng, Chloe Toi-Mei<br>Chan, Ivan Tak-Fai<br>Wong, Kingsley King-<br>Gee Tam, Hiu-Yin Lao,<br>Alan Ka-Lun Wu,<br>Miranda Chong-Yee<br>Yau, Yvette Wai-Man<br>Lai, Kitty Sau-Chun<br>Fung, Sandy Ka-Yee<br>Chau, Barry Kin-Chung<br>Wong, Wing-Kin To,<br>Kristine Luk, Alex Yat-<br>Man Ho, Tak-Lun Que,<br>Kam-Tong Yip, Wing<br>Cheong Yam, David<br>Ho-Keung Shum, Shea<br>Ping Yip |
| hCoV-<br>19/HongKong/CM2200<br>1347/2022               | EPI_ISL_1<br>2912012 | - | Temporary<br>Specimen<br>Collection<br>Centre at the<br>AsiaWorld-Expo,<br>Hong Kong<br>International<br>Airport | Hong Kong<br>Department of<br>Health                                                                    | Alan K.L. Tsang, Peter<br>C.W. Yip, Patricia K. L.<br>Leung, Ken H.L. Ng,<br>Edman T.K. Lam,<br>Rickjason C.W. Chan                                                                                                                                                                                                                                                                                                                                                                                                    |
| hCoV-<br>19/HongKong/CM2200<br>1345/2022               | EPI_ISL_1<br>2912010 | - | Temporary<br>Specimen<br>Collection<br>Centre at the<br>AsiaWorld-Expo,<br>Hong Kong<br>International<br>Airport | Hong Kong<br>Department of<br>Health                                                                    | Alan K.L. Tsang, Peter<br>C.W. Yip, Patricia K. L.<br>Leung, Ken H.L. Ng,<br>Edman T.K. Lam,<br>Rickjason C.W. Chan                                                                                                                                                                                                                                                                                                                                                                                                    |
| hCoV-<br>19/HongKong/CM2200<br>1339/2022               | EPI_ISL_1<br>2912007 | - | Temporary<br>Specimen<br>Collection<br>Centre at the<br>AsiaWorld-Expo,<br>Hong Kong<br>International<br>Airport | Hong Kong<br>Department of<br>Health                                                                    | Alan K.L. Tsang, Peter<br>C.W. Yip, Patricia K. L.<br>Leung, Ken H.L. Ng,<br>Edman T.K. Lam,<br>Rickjason C.W. Chan                                                                                                                                                                                                                                                                                                                                                                                                    |

|                                      |                      |   |                                                            |                                                                 |                                                                                                         |
|--------------------------------------|----------------------|---|------------------------------------------------------------|-----------------------------------------------------------------|---------------------------------------------------------------------------------------------------------|
| hCoV-19/HongKong/CM22001334/2022     | EPI_ISL_1<br>2912002 | - | Home Quarantine Taskforce, Centre for Health Protection    | Hong Kong Department of Health                                  | Alan K.L. Tsang, Peter C.W. Yip, Patricia K. L. Leung, Ken H.L. Ng, Edman T.K. Lam, Rickjason C.W. Chan |
| hCoV-19/HongKong/CM22001281/2022     | EPI_ISL_1<br>2911970 | - | Home Quarantine Taskforce, Centre for Health Protection    | Hong Kong Department of Health                                  | Alan K.L. Tsang, Peter C.W. Yip, Patricia K. L. Leung, Ken H.L. Ng, Edman T.K. Lam, Rickjason C.W. Chan |
| hCoV-19/HongKong/CM22001279/2022     | EPI_ISL_1<br>2911968 | - | Home Quarantine Taskforce, Centre for Health Protection    | Hong Kong Department of Health                                  | Alan K.L. Tsang, Peter C.W. Yip, Patricia K. L. Leung, Ken H.L. Ng, Edman T.K. Lam, Rickjason C.W. Chan |
| hCoV-19/HongKong/CM22001023/2022     | EPI_ISL_1<br>2693687 | - | Temporary Specimen Collection Centre at the AsiaWorld-Expo | Public Health Laboratory Centre, Hong Kong Department of Health | Alan K.L. Tsang, Peter C.W. Yip, Patricia K. L. Leung, Ken H.L. Ng, Edman T.K. Lam, Rickjason C.W. Chan |
| hCoV-19/HongKong/CM22000993/2022     | EPI_ISL_1<br>2537872 | - | Home Quarantine Taskforce                                  | Hong Kong Department of Health                                  | Alan K.L. Tsang, Peter C.W. Yip, Patricia K. L. Leung, Ken H.L. Ng, Edman T.K. Lam, Rickjason C.W. Chan |
| hCoV-19/HongKong/CM22000988/2022     | EPI_ISL_1<br>2537858 | - | Temporary Specimen Collection Centre at the AsiaWorld-Expo | Hong Kong Department of Health                                  | Alan K.L. Tsang, Peter C.W. Yip, Patricia K. L. Leung, Ken H.L. Ng, Edman T.K. Lam, Rickjason C.W. Chan |
| hCoV-19/HongKong/CM22000705/2022     | EPI_ISL_1<br>2138136 | - | Temporary Specimen Collection Centre at the AsiaWorld-Expo | Hong Kong Department of Health                                  | Alan K.L. Tsang, Peter C.W. Yip, Patricia K. L. Leung, Ken H.L. Ng, Edman T.K. Lam, Rickjason C.W. Chan |
| hCoV-19/HongKong/CH22084434/2022     | EPI_ISL_1<br>2771763 | - | QC CALL CENTRE                                             | Hong Kong Department of Health                                  | Alan K.L. Tsang, Peter C.W. Yip, Patricia K. L. Leung, Ken H.L. Ng, Edman T.K. Lam, Rickjason C.W. Chan |
| hCoV-19/Germany/BW-RKI-I-829764/2022 | EPI_ISL_1<br>3011779 | - | SYNLAB MVZ Leinfelden-Echterdingen                         | Robert Koch Institute                                           | unknown                                                                                                 |
| hCoV-19/Germany/BE-RKI-I-849151/2022 | EPI_ISL_1<br>3244595 | - | MDI Limbach Berlin GmbH; MVZ Labor Berlin                  | Robert Koch Institute                                           | unknown                                                                                                 |
| hCoV-19/France/IDF-                  | EPI_ISL_1            | - | BIOCLINIC SAINT                                            | Department of                                                   | Christophe Rodriguez,                                                                                   |

|                                         |                   |          |                           |                                                                                                                                                              |                                                                                                                                                             |
|-----------------------------------------|-------------------|----------|---------------------------|--------------------------------------------------------------------------------------------------------------------------------------------------------------|-------------------------------------------------------------------------------------------------------------------------------------------------------------|
| HMN-22052111210/2022                    | 3076374           |          | MAUR                      | Virology, Henri Mondor University Hospital, Assistance Publique H, à l'Université de Paris, Université Paris-Est Cr, à l'Institut, INSERM U955               | Slim Fourati, Vanessa Demontant, Guillaume Gricourt, Melissa NDebi, Alexandre Soulier, Elisabeth Trawinski, Jean-Michel Pawlotsky                           |
| hCoV-19/France/ARA-HMN-22062241398/2022 | EPI_ISL_1 3853966 | -        | STMARTINS ORIADE          | Department of Virology, Henri Mondor University Hospital, Assistance Publique H, à l'Université de Paris, Université Paris-Est Cr, à l'Institut, INSERM U955 | Christophe Rodriguez, Slim Fourati, Vanessa Demontant, Guillaume Gricourt, Melissa NDebi, Alexandre Soulier, Elisabeth Trawinski, Jean-Michel Pawlotsky     |
| hCoV-19/France/ARA-HCL722003303401/2022 | EPI_ISL_1 3877582 | -        | LABORATOIRE NOVELAB       | CNR Virus des Infections Respiratoires - France SUD                                                                                                          | Antonin Bal, Bruno Simon, Theophile Boyer, Gregory Destras, Gwendolyne Burfin, Hadrien Regue, Quentin Semanas, Martine Valette, Bruno Lina, Laurence Josset |
| FRA/IHUCOVID-012678_Nova1/2020          | -                 | ON298268 | -                         | -                                                                                                                                                            | Levasseur et al                                                                                                                                             |
| FRA/IHUCOVID-003240-1/2021              | EPI_ISL_1 020400  | ON442169 | -                         | -                                                                                                                                                            | Levasseur et al                                                                                                                                             |
| FRA/IHUCOVID-000496_Illu2/2020          | EPI_ISL_2 596805  | ON286323 | -                         | -                                                                                                                                                            | Levasseur et al                                                                                                                                             |
| England/RAND-15242CC/2021               | EPI_ISL_1 985276  | OU266353 | Randox Laboratories       | Wellcome Sanger Institute                                                                                                                                    | Randox et al                                                                                                                                                |
| England/QEUH-B11E25/2020                | EPI_ISL_6 42541   | OB991508 | Lighthouse Lab in Glasgow | Wellcome Sanger Institute                                                                                                                                    | VanSteenhouse et al                                                                                                                                         |
| England/QEUH-AD246B/2020                | EPI_ISL_6 34112   | OB989968 | Lighthouse Lab in Glasgow | Wellcome Sanger Institute                                                                                                                                    | VanSteenhouse et al                                                                                                                                         |
| England/QEUH-95F704/2020                | EPI_ISL_5 32428   | OA969870 | Lighthouse Lab in Glasgow | Wellcome Sanger Institute                                                                                                                                    | VanSteenhouse et al                                                                                                                                         |
| hCoV-19/England/QEUH-3DE0273/2022       | EPI_ISL_1 2547840 | -        | Lighthouse Lab in Glasgow | Wellcome Sanger Institute for the COVID-19 Genomics UK                                                                                                       | Harper VanSteenhouse, Yumi Kasai, David Gray, Carol Clugston, Anna                                                                                          |

|                           |                     |          |                                                                   |                           |                                                                                                                                                                                                                                                           |
|---------------------------|---------------------|----------|-------------------------------------------------------------------|---------------------------|-----------------------------------------------------------------------------------------------------------------------------------------------------------------------------------------------------------------------------------------------------------|
|                           |                     |          |                                                                   | (COG-UK)<br>Consortium    | Dominiczak and Alex Alderton, Roberto Amato, Jeffrey Barrett, Sonia Goncalves, Ewan Harrison, David K. Jackson, Ian Johnston, Dominic Kwiatkowski, Cordelia Langford, John Sillitoe on behalf of the Wellcome Sanger Institute COVID-19 Surveillance Team |
| England/QEUH-153B1D4/2021 | EPI_ISL_2<br>005000 | OU270509 | Lighthouse Lab in Glasgow                                         | Wellcome Sanger Institute | VanSteenhouse et al                                                                                                                                                                                                                                       |
| England/QEUH-11CAB2B/2021 | EPI_ISL_9<br>57130  | OD964610 | Lighthouse Lab in Glasgow                                         | Wellcome Sanger Institute | VanSteenhouse et al                                                                                                                                                                                                                                       |
| England/PLYM-2045528/2021 | EPI_ISL_5<br>024200 | OU844323 | Lighthouse Laboratory Plymouth                                    | Wellcome Sanger Institute | Lighthouse Laboratory et al                                                                                                                                                                                                                               |
| England/NORT-2818A3/2020  | EPI_ISL_4<br>88783  | OA965074 | NU-OMICS DNA Sequencing research facility, Northumbria University | Wellcome Sanger Institute | Duncan et al                                                                                                                                                                                                                                              |
| England/MILK-9A54AE/2020  | EPI_ISL_5<br>50143  | OA972543 | Lighthouse Lab in Milton Keynes                                   | Wellcome Sanger Institute | The Lighthouse Lab in Milton et al                                                                                                                                                                                                                        |
| England/MILK-9757AE/2020  | EPI_ISL_5<br>52482  | OA974655 | Lighthouse Lab in Milton Keynes                                   | Wellcome Sanger Institute | The Lighthouse Lab in Milton et al                                                                                                                                                                                                                        |
| England/MILK-654289/2020  | EPI_ISL_5<br>58030  | OA980217 | Lighthouse Lab in Milton Keynes                                   | Wellcome Sanger Institute | The Lighthouse Lab in Milton et al                                                                                                                                                                                                                        |
| England/MILK-62D81E/2020  | EPI_ISL_5<br>57953  | OA980218 | Lighthouse Lab in Milton Keynes                                   | Wellcome Sanger Institute | The Lighthouse Lab in Milton et al                                                                                                                                                                                                                        |
| England/MILK-30847CA/2021 | EPI_ISL_8<br>445018 | OV413443 | Lighthouse Lab in Milton Keynes                                   | Wellcome Sanger Institute | The Lighthouse Lab in Milton et al                                                                                                                                                                                                                        |
| England/MILK-1FE9180/2021 | EPI_ISL_4<br>893890 | OU832281 | Lighthouse Lab in Milton Keynes                                   | Wellcome Sanger Institute | The Lighthouse Lab in Milton et al                                                                                                                                                                                                                        |
| England/MILK-1FD2E47/2021 | EPI_ISL_4<br>897753 | OU828525 | Lighthouse Lab in Milton Keynes                                   | Wellcome Sanger Institute | The Lighthouse Lab in Milton et al                                                                                                                                                                                                                        |
| England/MILK-1F9D3D0/2021 | EPI_ISL_4<br>755259 | OU794998 | Lighthouse Lab in Milton Keynes                                   | Wellcome Sanger Institute | The Lighthouse Lab in Milton et al                                                                                                                                                                                                                        |
| England/MILK-154F9E4/2021 | EPI_ISL_1<br>986586 | OU266945 | Lighthouse Lab in Milton Keynes                                   | Wellcome Sanger Institute | The Lighthouse Lab in Milton et al                                                                                                                                                                                                                        |
| England/MILK-11694BA/2021 | EPI_ISL_9<br>38922  | OD955471 | Lighthouse Lab in Milton Keynes                                   | Wellcome Sanger Institute | The Lighthouse Lab in Milton et al                                                                                                                                                                                                                        |
| England/CAMC-B52101/2020  | EPI_ISL_6<br>57793  | OB999781 | Lighthouse Lab in Cambridge                                       | Wellcome Sanger Institute | Howes et al                                                                                                                                                                                                                                               |
| England/CAMC-145BB4A/2021 | EPI_ISL_1<br>473723 | OU215329 | Lighthouse Lab in Cambridge                                       | Wellcome Sanger Institute | Howes et al                                                                                                                                                                                                                                               |
| England/CAMC-133BC8A/2021 | EPI_ISL_1<br>831442 | OU263813 | Lighthouse Lab in Cambridge                                       | Wellcome Sanger Institute | Howes et al                                                                                                                                                                                                                                               |

|                                  |                      |              |                                                                                          |                                                              |                                   |
|----------------------------------|----------------------|--------------|------------------------------------------------------------------------------------------|--------------------------------------------------------------|-----------------------------------|
| England/CAMB-84BD6/2020          | EPI_ISL_4<br>40515   | FR996847     | Department of Pathology, University of Cambridge                                         | Wellcome Sanger Institute                                    | Meredith et al                    |
| England/BRBR-1995B5E/2021        | EPI_ISL_3<br>093043  | OU457630     | Berkshire and Surrey Pathology Services Lighthouse Laboratory                            | Wellcome Sanger Institute                                    | Berkshire et al                   |
| England/ALDP-C39275/2020         | EPI_ISL_7<br>31487   | OD909855     | Lighthouse Lab in Alderley Park                                                          | Wellcome Sanger Institute                                    | Wynn et al                        |
| England/ALDP-C062CC/2020         | EPI_ISL_7<br>09427   | OD905007     | Lighthouse Lab in Alderley Park                                                          | Wellcome Sanger Institute                                    | Wynn et al                        |
| England/ALDP-2DAB426/2021        | EPI_ISL_7<br>625201  | OV464532     | Lighthouse Lab in Alderley Park                                                          | Wellcome Sanger Institute                                    | Wynn et al                        |
| England/ALDP-20242EC/2021        | EPI_ISL_5<br>027976  | OU850730     | Lighthouse Lab in Alderley Park                                                          | Wellcome Sanger Institute                                    | Wynn et al                        |
| England/ALDP-1651720/2021        | EPI_ISL_2<br>541661  | OU334042     | Lighthouse Lab in Alderley Park                                                          | Wellcome Sanger Institute                                    | Wynn et al                        |
| England/ALDP-154FF3D/2021        | EPI_ISL_1<br>986886  | OU267164     | Lighthouse Lab in Alderley Park                                                          | Wellcome Sanger Institute                                    | Wynn et al                        |
| England/ALDP-1490C28/2021        | EPI_ISL_1<br>488833  | OU226240     | Lighthouse Lab in Alderley Park                                                          | Wellcome Sanger Institute                                    | Wynn et al                        |
| England/ALDP-12AB891/2021        | EPI_ISL_1<br>061906  | OD993942     | Lighthouse Lab in Alderley Park                                                          | Wellcome Sanger Institute                                    | Wynn et al                        |
| England/ALDP-10F9B51/2021        | EPI_ISL_9<br>17632   | OD951405     | Lighthouse Lab in Alderley Park                                                          | Wellcome Sanger Institute                                    | Wynn et al                        |
| England/ALDP-10312A3/2021        | EPI_ISL_8<br>80535   | OD942732     | Lighthouse Lab in Alderley Park                                                          | Wellcome Sanger Institute                                    | Wynn et al                        |
| EGY/CUNCI-HGC91014/2020          | EPI_ISL_9<br>07087   | MW54744<br>2 | -                                                                                        | -                                                            | Zekri et al                       |
| EGY/CCHE57357_W3_A088/2021       | -                    | OK001882     | -                                                                                        | -                                                            | Hatem et al                       |
| DEU/NRW-06/2020                  | EPI_ISL_4<br>14505   | MT582494     | Center of Medical Microbiology, Virology, and Hospital Hygiene, University of Dusseldorf | Heinrich Heine University                                    | Houwaart et al                    |
| DEU/C1291/2021                   | -                    | OM46244<br>2 | -                                                                                        | -                                                            | Kieninger et al                   |
| hCoV-19/Denmark/DCGC-527922/2022 | EPI_ISL_1<br>3299190 | -            | Department of Bacteria, Parasites and Fungi, Statens Serum Institut, Copenhagen, Denmark | Statens Serum Institut Bioinformatics and Microbial Genomics | Danish Covid-19 Genome Consortium |

|                                  |                      |          |                                                                                          |                                                                        |                                   |
|----------------------------------|----------------------|----------|------------------------------------------------------------------------------------------|------------------------------------------------------------------------|-----------------------------------|
| hCoV-19/Denmark/DCGC-526165/2022 | EPI_ISL_1<br>3178888 | -        | Department of Bacteria, Parasites and Fungi, Statens Serum Institut, Copenhagen, Denmark | Statens Serum Institut<br>Bioinformatics and Microbial Genomics        | Danish Covid-19 Genome Consortium |
| Denmark/DCGC-525453/2022         | -                    | OX209628 | Department of Bacteria, Parasites and Fungi, Statens Serum Institut, Copenhagen, Denmark | statens serum institut and the danish covid19 genome consortium (dcgc) | Danish Covid-19 Genome et al      |
| Denmark/DCGC-519203/2022         | -                    | OX205413 | Department of Bacteria, Parasites and Fungi, Statens Serum Institut, Copenhagen, Denmark | statens serum institut and the danish covid19 genome consortium (dcgc) | Danish Covid-19 Genome et al      |
| hCoV-19/Denmark/DCGC-518675/2022 | EPI_ISL_1<br>2895962 | -        | Department of Bacteria, Parasites and Fungi, Statens Serum Institut, Copenhagen, Denmark | Statens Serum Institut<br>Bioinformatics and Microbial Genomics        | Danish Covid-19 Genome Consortium |
| hCoV-19/Denmark/DCGC-518156/2022 | EPI_ISL_1<br>2895448 | -        | Department of Bacteria, Parasites and Fungi, Statens Serum Institut, Copenhagen, Denmark | Statens Serum Institut<br>Bioinformatics and Microbial Genomics        | Danish Covid-19 Genome Consortium |
| hCoV-19/Denmark/DCGC-516956/2022 | EPI_ISL_1<br>2811161 | -        | Department of Bacteria, Parasites and Fungi, Statens Serum Institut, Copenhagen, Denmark | Statens Serum Institut<br>Bioinformatics and Microbial Genomics        | Danish Covid-19 Genome Consortium |
| hCoV-19/Denmark/DCGC-506132/2022 | EPI_ISL_1<br>2534001 | -        | Department of Bacteria, Parasites and Fungi, Statens Serum Institut, Copenhagen, Denmark | Statens Serum Institut<br>Bioinformatics and Microbial Genomics        | Danish Covid-19 Genome Consortium |
| Denmark/DCGC-506024/2022         | -                    | OX195666 | Department of Bacteria, Parasites and                                                    | statens serum institut and the danish covid19                          | Danish Covid-19 Genome et al      |

|                                     |                      |          |                                                                                          |                                                                        |                                                                                                                                                                                                                                                                                                                                                                               |
|-------------------------------------|----------------------|----------|------------------------------------------------------------------------------------------|------------------------------------------------------------------------|-------------------------------------------------------------------------------------------------------------------------------------------------------------------------------------------------------------------------------------------------------------------------------------------------------------------------------------------------------------------------------|
|                                     |                      |          | Fungi, Statens Serum Institut, Copenhagen, Denmark                                       | genome consortium (dcgc)                                               |                                                                                                                                                                                                                                                                                                                                                                               |
| Denmark/DCGC-447615/2022            | -                    | OX121053 | Department of Bacteria, Parasites and Fungi, Statens Serum Institut, Copenhagen, Denmark | statens serum institut and the danish covid19 genome consortium (dcgc) | Danish Covid-19 Genome et al                                                                                                                                                                                                                                                                                                                                                  |
| Denmark/DCGC-446089/2022            | -                    | OX119393 | Department of Bacteria, Parasites and Fungi, Statens Serum Institut, Copenhagen, Denmark | statens serum institut and the danish covid19 genome consortium (dcgc) | Danish Covid-19 Genome et al                                                                                                                                                                                                                                                                                                                                                  |
| Denmark/DCGC-127684/2021            | EPI_ISL_2<br>972615  | OV917415 | Department of Bacteria, Parasites and Fungi, Statens Serum Institut, Copenhagen, Denmark | statens serum institut and the danish covid19 genome consortium (dcgc) | Danish Covid-19 Genome et al                                                                                                                                                                                                                                                                                                                                                  |
| hCoV-19/Chile/RM-52265/2022         | EPI_ISL_1<br>2688039 | -        | Genetica Molecular and Subdepartamento de Virologia ISP Chile                            | Instituto de Salud Publica de Chile                                    | Karen Orostica, Constanza Campano, Marcelo Rojas, Barbara Parra, Patricia Bustos, Rodrigo Fasce, Andres Castillo, Matias Pezoa, Ivan Ponce, Jorge Fernandez                                                                                                                                                                                                                   |
| hCoV-19/Canada/ON-PHL-22-22167/2022 | EPI_ISL_1<br>2881278 | -        | Public Health Ontario Laboratory                                                         | Public Health Ontario Laboratory                                       | Jacob Afelskie, Rebecca Azzaro, Doonia Bajovic, Philip Banh, Claudia Chu, Kirby Cronin, Rachelle DiTullio, Carla Duncan, Dhiraj Gaglani, Mark Horsman, Hadia Hussain, Jason Iraheta, Grace Jeong, Sushma Kavikondala, Lisa Kim, Surendra Kumar, Aimin Li, Maria Mariscal, Alex Marchand-Austin, Dean Maxwell, Lisa McTaggart, Fatima Merza, Esther Nagai, Rima Palencia, John |



|                                         |                        |                                                              |                                                                   |                                                                                                                                                                                                                                                                                                                                                                                                                                                                                                                                                       |
|-----------------------------------------|------------------------|--------------------------------------------------------------|-------------------------------------------------------------------|-------------------------------------------------------------------------------------------------------------------------------------------------------------------------------------------------------------------------------------------------------------------------------------------------------------------------------------------------------------------------------------------------------------------------------------------------------------------------------------------------------------------------------------------------------|
|                                         |                        |                                                              |                                                                   | Palmer, Samir N Patel,<br>Nataliya Potapova,<br>Anna Puzinovici, Zarah<br>Rajaei, Christina<br>Rampertab, Himeshi<br>Samarsinghe, Candice<br>Schreiber, Narisha<br>Shakuralli, Christine<br>Seah, Karthikeyan<br>Sivaraman, Fatemeh<br>Shaeri, Natasha Sing,<br>Vincent Su Bin Cha,<br>Ashleigh Sullivan,<br>Sarah Teatero, Semra<br>Tibebu, Nobish<br>Varghese, Brandon Ye,<br>Andre Villegas, Jesse<br>Wang, Sophie Yu                                                                                                                              |
| hCoV-19/Canada/NL-<br>PHML-449070/2022  | EPI_ISL_1 -<br>3429304 | NL-Dr. Leonard<br>A. Miller Centre<br>for Health<br>Services | Newfoundland<br>and Labrador -<br>Eastern Health                  | Anna Majer, Shari<br>Tyson, Grace Seo,<br>Philip Mabon, Elsie<br>Grudeski, Rhiannon<br>Huzarewich, Russell<br>Mandes, Anneliese<br>Landgraff, Jennifer<br>Tanner, Natalie Knox,<br>Morag Graham, Gary<br>Van Domselaar,<br>Robert Needle, Yang<br>Yu, George Zahariadis,<br>Phil Andrews,<br>Christopher Corkum,<br>Geoffrey Woodland,<br>Nathalie Bastien, Yan<br>Li, Timothy Booth,<br>Darian Hole, Madison<br>Chapel, Ana Duggan,<br>Kirsten Biggar,<br>CanCOGeNs metadata<br>curation team, Public<br>Health Agency of<br>Canada CanCOGeN<br>team |
| hCoV-19/Canada/BC-<br>BCCDC-450890/2022 | EPI_ISL_1 -<br>3412609 | British Columbia<br>Centre For<br>Disease Control            | B.C. Centre for<br>Disease Control<br>Public Health<br>Laboratory | Prystajacky Natalie,<br>Linda Hoang, Dan<br>Fornika, John Tyson,<br>Shannon Russell, Kim<br>Macdonald, Kimia<br>Kamelian, James<br>Zlosnik, Ana<br>Pacagnella, Corrinne<br>Ng, Loretta Janz,                                                                                                                                                                                                                                                                                                                                                          |

|                                               |                      |          |                                                            |                                                                   |                                                                                                                                                                                                                             |
|-----------------------------------------------|----------------------|----------|------------------------------------------------------------|-------------------------------------------------------------------|-----------------------------------------------------------------------------------------------------------------------------------------------------------------------------------------------------------------------------|
|                                               |                      |          |                                                            |                                                                   | Robert Azana, Mel Krajden                                                                                                                                                                                                   |
| hCoV-19/Canada/BC-BCCDC-450325/2022           | EPI_ISL_1<br>3412156 | -        | British Columbia<br>Centre For<br>Disease Control          | B.C. Centre for<br>Disease Control<br>Public Health<br>Laboratory | Prystajecy Natalie,<br>Linda Hoang, Dan<br>Fornika, John Tyson,<br>Shannon Russell, Kim<br>Macdonald, Kimia<br>Kamelian, James<br>Zlosnik, Ana<br>Pacagnella, Corrinne<br>Ng, Loretta Janz,<br>Robert Azana, Mel<br>Krajden |
| hCoV-19/Canada/BC-BCCDC-442235/2022           | EPI_ISL_1<br>3320726 | -        | British Columbia<br>Centre For<br>Disease Control          | B.C. Centre for<br>Disease Control<br>Public Health<br>Laboratory | Prystajecy Natalie,<br>Linda Hoang, Dan<br>Fornika, John Tyson,<br>Shannon Russell, Kim<br>Macdonald, Kimia<br>Kamelian, James<br>Zlosnik, Ana<br>Pacagnella, Corrinne<br>Ng, Loretta Janz,<br>Robert Azana, Mel<br>Krajden |
| hCoV-19/Cambodia/g062104<br>7/2022            | EPI_ISL_1<br>3613167 | -        | Virology Unit,<br>Institut Pasteur<br>du Cambodge<br>(IPC) | Virology Unit,<br>Institut Pasteur<br>du Cambodge<br>(IPC)        | Leakhena Pum,<br>Sophoannadedh Rath,<br>Cecile Troupin, Jurre Y<br>Siegers, Ly Sovann,<br>Kraing Sidonn, Yi<br>Sengdoeurn, Chin<br>Savuth, Chau<br>Darapheak, Veasna<br>Duong, Erik A Karlsson                              |
| hCoV-19/Cambodia/g061611<br>7/2022            | EPI_ISL_1<br>3613162 | -        | Virology Unit,<br>Institut Pasteur<br>du Cambodge<br>(IPC) | Virology Unit,<br>Institut Pasteur<br>du Cambodge<br>(IPC)        | Leakhena Pum,<br>Sophoannadedh Rath,<br>Cecile Troupin, Jurre Y<br>Siegers, Ly Sovann,<br>Kraing Sidonn, Yi<br>Sengdoeurn, Chin<br>Savuth, Chau<br>Darapheak, Veasna<br>Duong, Erik A Karlsson                              |
| BRA/SP-<br>NXBS1644GENOV8276<br>72305963/2021 | EPI_ISL_4<br>415938  | ON576167 | -                                                          | -                                                                 | Guarisch et al                                                                                                                                                                                                              |
| BRA/GO-<br>NVBS2560GENOV7008<br>00055209/2021 | EPI_ISL_4<br>423895  | ON576898 | -                                                          | -                                                                 | Guarisch et al                                                                                                                                                                                                              |
| BGD/ideSHi-TR-<br>673/2021                    | EPI_ISL_1<br>915113  | MZ413856 | -                                                          | -                                                                 | Afrad et al                                                                                                                                                                                                                 |
| hCoV-19/Austria/LB-<br>R00087-S250/2022       | EPI_ISL_1<br>3826133 | -        | Lifefrain Covid<br>Labor GmbH                              | Lifefrain Covid<br>Labor GmbH                                     | Filip Sima, Alexandra<br>Wagner, Kristina                                                                                                                                                                                   |

|                                        |                      |   |                                                                                                                          |                                                                                                                                                                 |                                                                                                    |
|----------------------------------------|----------------------|---|--------------------------------------------------------------------------------------------------------------------------|-----------------------------------------------------------------------------------------------------------------------------------------------------------------|----------------------------------------------------------------------------------------------------|
|                                        |                      |   |                                                                                                                          |                                                                                                                                                                 | Bavrka Kolenc, Lucia<br>Castello, Anna<br>Edermayr                                                 |
| hCoV-19/Austria/LB-R00087-S007/2022    | EPI_ISL_1<br>3825898 | - | Lifebrian Covid<br>Labor GmbH                                                                                            | Lifebrian Covid<br>Labor GmbH                                                                                                                                   | Filip Sima, Alexandra<br>Wagner, Kristina<br>Bavrka Kolenc, Lucia<br>Castello, Anna<br>Edermayr    |
| hCoV-19/Australia/VIC65083/2022        | EPI_ISL_1<br>3710153 | - | Microbiological<br>Diagnostic Unit -<br>Public Health<br>Laboratory<br>(MDU-PHL)                                         | Microbiological<br>Diagnostic Unit -<br>Public Health<br>Laboratory<br>(MDU-PHL)                                                                                | Seemann, T., Horan,<br>K., Sherry, N.L.                                                            |
| hCoV-19/Australia/VIC63016/2022        | EPI_ISL_1<br>3458344 | - | Microbiological<br>Diagnostic Unit -<br>Public Health<br>Laboratory<br>(MDU-PHL)                                         | Microbiological<br>Diagnostic Unit -<br>Public Health<br>Laboratory<br>(MDU-PHL)                                                                                | Seemann, T., Horan,<br>K., Sherry, N.L.                                                            |
| hCoV-19/Australia/NSW-SAVID-12395/2022 | EPI_ISL_1<br>3199454 | - | Area of Virology,<br>Serology and<br>Virology Division<br>(SAViD), New<br>South Wales<br>Health<br>Pathology<br>Randwick | Virology<br>Research<br>Laboratory; Area<br>of Virology,<br>Serology and<br>Virology Division<br>(SAViD), New<br>South Wales<br>Health<br>Pathology<br>Randwick | Foster, C.; Jean, T.;<br>Wong, M.; Yeang, M.;<br>Van Hal, S.; Rawlinson,<br>W.                     |
| hCoV-19/Australia/NSW-ICPMR-28746/2022 | EPI_ISL_1<br>3721586 | - | Australian<br>Clinical Labs<br>(formerly<br>Healthscope<br>Pathology)                                                    | NSW Health<br>Pathology -<br>Institute of<br>Clinical<br>Pathology and<br>Medical<br>Research;<br>Westmead<br>Hospital;<br>University of<br>Sydney              | Arnott A., Draper J.,<br>Gall M., Martinez E.,<br>Rockett R., Sintchenko<br>V., on behalf of ICPMR |
| hCoV-19/Australia/NSW-ICPMR-26871/2022 | EPI_ISL_1<br>3198944 | - | 4Cyte Pathology                                                                                                          | NSW Health<br>Pathology -<br>Institute of<br>Clinical<br>Pathology and<br>Medical<br>Research;<br>Westmead<br>Hospital;<br>University of<br>Sydney              | Arnott A., Draper J.,<br>Gall M., Martinez E.,<br>Rockett R., Sintchenko<br>V., on behalf of ICPMR |
| hCoV-                                  | EPI_ISL_1            | - | Laverty                                                                                                                  | NSW Health                                                                                                                                                      | Arnott A., Draper J.,                                                                              |

|                                        |                      |              |                                                                      |                                                                                                                      |                                                                                           |
|----------------------------------------|----------------------|--------------|----------------------------------------------------------------------|----------------------------------------------------------------------------------------------------------------------|-------------------------------------------------------------------------------------------|
| 19/Australia/NSW-ICPMR-26741/2022      | 3198814              |              | Pathology                                                            | Pathology - Institute of Clinical Pathology and Medical Research; Westmead Hospital; University of Sydney            | Gall M., Martinez E., Rockett R., Sintchenko V., on behalf of ICPMR                       |
| hCoV-19/Australia/NSW-ICPMR-25941/2022 | EPI_ISL_1<br>2932830 | -            | Australian Clinical Labs (formerly Healthscope Pathology)            | NSW Health Pathology - Institute of Clinical Pathology and Medical Research; Westmead Hospital; University of Sydney | Arnott A., Draper J., Gall M., Martinez E., Rockett R., Sintchenko V., on behalf of ICPMR |
| AUS/VIC9904/2020                       | -                    | MW15639<br>4 | Microbiological Diagnostic Unit - Public Health Laboratory (MDU-PHL) | The Peter Doherty Institute for Infection and Immunity                                                               | Caly et al                                                                                |
| AUS/VIC9581/2020                       | -                    | MW15622<br>8 | Microbiological Diagnostic Unit - Public Health Laboratory (MDU-PHL) | The Peter Doherty Institute for Infection and Immunity                                                               | Caly et al                                                                                |
| AUS/VIC8368/2020                       | -                    | MW15369<br>4 | Microbiological Diagnostic Unit - Public Health Laboratory (MDU-PHL) | The Peter Doherty Institute for Infection and Immunity                                                               | Caly et al                                                                                |
| AUS/VIC8060/2020                       | -                    | MW15348<br>9 | Microbiological Diagnostic Unit - Public Health Laboratory (MDU-PHL) | The Peter Doherty Institute for Infection and Immunity                                                               | Caly et al                                                                                |
| AUS/VIC7296/2020                       | -                    | MW15493<br>7 | Victorian Infectious Diseases Reference Laboratory (VIDRL)           | The Peter Doherty Institute for Infection and Immunity                                                               | Caly et al                                                                                |
| AUS/VIC4980/2020                       | EPI_ISL_5<br>19346   | MT970670     | Microbiological Diagnostic Unit - Public Health Laboratory (MDU-PHL) | The Peter Doherty Institute for Infection and Immunity                                                               | Sait et al                                                                                |

|                   |                    |              |                                                                                  |                                                                    |               |
|-------------------|--------------------|--------------|----------------------------------------------------------------------------------|--------------------------------------------------------------------|---------------|
| AUS/VIC3701/2020  | EPI_ISL_5<br>20437 | MT970093     | Microbiological<br>Diagnostic Unit -<br>Public Health<br>Laboratory<br>(MDU-PHL) | The Peter<br>Doherty<br>Institute for<br>Infection and<br>Immunity | Sait et al    |
| AUS/VIC17386/2020 | EPI_ISL_6<br>63869 | MW32089<br>7 | Microbiological<br>Diagnostic Unit -<br>Public Health<br>Laboratory<br>(MDU-PHL) | The Peter<br>Doherty<br>Institute for<br>Infection and<br>Immunity | Seemann et al |
| AUS/VIC1614/2020  | EPI_ISL_4<br>56523 | MT612213     | Victorian<br>Infectious<br>Diseases<br>Reference<br>Laboratory<br>(VIDRL)        | The Peter<br>Doherty<br>Institute for<br>Infection and<br>Immunity | Caly et al    |
| AUS/VIC14070/2020 | -                  | MW15687<br>1 | Microbiological<br>Diagnostic Unit -<br>Public Health<br>Laboratory<br>(MDU-PHL) | The Peter<br>Doherty<br>Institute for<br>Infection and<br>Immunity | Caly et al    |
| AUS/VIC11388/2020 | -                  | MW15683<br>6 | Microbiological<br>Diagnostic Unit -<br>Public Health<br>Laboratory<br>(MDU-PHL) | The Peter<br>Doherty<br>Institute for<br>Infection and<br>Immunity | Caly et al    |
